# Supplementary material for: Analysis of the Hypoxic Response in a Mouse Cortical Collecting Duct-Derived Cell Line Suggests That Esrra Is Partially Involved in Hif1α-Mediated Hypoxia-Inducible Gene Expression in mCCDcl1 Cells
Source: Int J Mol Sci. 2022 Jun 30;23(13):7262. doi: 10.3390/ijms23137262 (PMC9267015; doi:10.3390/ijms23137262)
Supplement: Supplementary file 1 [file ijms-23-07262-s001.zip › Table S1.xlsx]

## Sheet: Limma-Voom
Row-names	Symbol	logFC	adj-P-Val	data	N1	N2	N3	H1	H2	H3
ENSMUSG00000023045	Soat2	9.0898	0.0001		2.3266	2.5278	2.2599	9.878	9.5585	9.8835
ENSMUSG00000030790	Adm	8.2091	0.0008		2.5928	5.3612	2.9906	11.6664	11.3245	10.413
ENSMUSG00000022262	Dnah5	7.8103	0.0006		2.3266	2.5278	2.2599	9.1779	8.5043	7.6758
ENSMUSG00000025347	Mettl7b	7.6492	0.0001		4.4786	4.6554	5.8892	12.888	12.0183	12.6407
ENSMUSG00000024912	Fosl1	7.6063	0.0001		4.3407	3.868	5.6606	12.0393	12.2471	11.7457
ENSMUSG00000029727	Cyp3a13	7.6049	0.0007		2.3266	2.9133	2.2599	8.0888	9.3704	8.2642
ENSMUSG00000029134	Plb1	7.4794	0.0008		2.3266	2.7334	2.2599	8.8342	8.6823	7.3267
ENSMUSG00000029334	Prkg2	7.4181	0.0004		4.0176	3.868	5.3614	12.3942	11.3334	11.0234
ENSMUSG00000013483	Card14	7.1602	0.0053		2.8174	3.2173	2.671	9.9417	9.7249	7.4565
ENSMUSG00000009687	Fxyd5	7.0537	0.0006		3.183	2.5278	3.9858	9.3339	10.1039	9.0383
ENSMUSG00000116657	Gm49774	6.9582	0.0006		2.5928	4.3148	3.6651	10.3209	10.0313	9.1817
ENSMUSG00000029378	Areg	6.884	0.0046		3.183	2.9133	2.48	9.6306	9.0798	7.1427
ENSMUSG00000104554	Gm4610	6.8688	0.0013		4.3407	4.6554	3.252	10.9554	11.1785	9.4402
ENSMUSG00000024388	Myo7b	6.6279	0.01		2.3266	3.9527	3.1272	9.8487	9.4707	7.0107
ENSMUSG00000114554	5430425K12Rik	6.4981	0.0032		2.8174	2.7334	2.2599	8.8783	7.6361	6.5849
ENSMUSG00000030187	Klra2	6.4871	0.0045		2.5928	2.2879	2.671	8.3195	8.2818	5.9783
ENSMUSG00000005611	Irag1	6.373	0.0007		2.8174	3.0733	2.671	8.9897	7.8499	7.823
ENSMUSG00000055333	Fat2	6.3647	0.0023		3.7167	5.8552	5.2758	11.6016	11.9696	9.8301
ENSMUSG00000028125	Abca4	6.3463	0.0004		4.0176	5.2978	4.5692	11.0263	11.1752	10.0535
ENSMUSG00000109372	Gm19410	6.309	0.0014		2.3266	2.2879	2.2599	7.5044	5.7206	7.1567
ENSMUSG00000074489	Bglap3	6.1561	0.0013		2.5928	2.5278	2.671	7.6197	8.2867	6.5217
ENSMUSG00000021950	Anxa8	6.1398	0.0102		3.183	3.868	3.252	10.2555	9.3448	7.1286
ENSMUSG00000053141	Ptprt	6.1017	0.0038		3.8241	3.3482	2.2599	9.2713	7.8096	7.3512
ENSMUSG00000020256	Aldh1l2	5.9113	0.0001		8.5739	8.6557	7.5604	14.3635	14.0964	13.985
ENSMUSG00000063767	S100a7a	5.8656	0.0011		2.8174	4.4951	3.1272	9.2333	8.844	7.9406
ENSMUSG00000039518	Cdsn	5.8037	0.0011		3.183	3.2173	2.8396	8.9654	7.6206	7.5961
ENSMUSG00000029468	P2rx7	5.7898	0.0007		3.0117	2.5278	2.48	7.7583	7.329	6.6054
ENSMUSG00000042759	Apobr	5.7672	0.0027		2.5928	2.2879	2.671	7.7646	5.7774	7.1427
ENSMUSG00000085912	Trp53cor1	5.7648	0.0045		3.0117	3.3482	2.8396	9.3083	7.6815	6.9154
ENSMUSG00000024421	Lama3	5.716	0.0011		4.8782	6.3529	4.056	11.2324	10.7607	9.7837
ENSMUSG00000036480	Prss56	5.7045	0.0186		2.3266	2.2879	2.671	8.729	5.5679	5.3111
ENSMUSG00000026981	Il1rn	5.6669	0.0007		3.183	4.3148	4.3632	9.9376	8.9027	8.8451
ENSMUSG00000085183	Wincr1	5.6086	0.0005		4.4786	4.972	5.4682	11.155	10.0062	10.1262
ENSMUSG00000035273	Hpse	5.4551	0.0007		4.7748	5.6163	3.6651	9.9152	10.3403	9.3058
ENSMUSG00000031844	Hsd17b2	5.4216	0.0023		2.3266	2.9133	2.2599	6.8032	7.0348	5.3601
ENSMUSG00000037411	Serpine1	5.4209	0.0005		9.3132	9.5051	11.4881	15.5295	15.6797	15.4279
ENSMUSG00000108179	Gm44274	5.3802	0.0011		2.3266	2.9133	2.8396	7.5193	6.9508	6.183
ENSMUSG00000027824	Vmn2r1	5.3389	0.0071		2.5928	3.3482	2.2599	7.5044	7.465	5.3111
ENSMUSG00000021831	Ero1a	5.3059	0.0001		10.3918	10.9267	9.9412	16.1336	15.9405	15.1422
ENSMUSG00000050914	Ankrd37	5.283	0.0008		5.343	7.9376	5.5434	11.9425	11.3846	11.1412
ENSMUSG00000005413	Hmox1	5.2829	0.0001		8.8305	8.7445	8.859	14.4342	13.8388	14.0137
ENSMUSG00000037613	Tnfrsf23	5.2629	0.0003		7.078	6.7463	6.6024	12.3516	12.497	11.2485
ENSMUSG00000038550	Ciart	5.2382	0.0001		5.3064	6.1704	5.9458	10.8012	10.7483	11.3903
ENSMUSG00000004540	Psg17	5.2381	0.0008		2.5928	2.7334	2.2599	6.6889	6.6033	5.7762
ENSMUSG00000074796	Slc4a11	5.2264	0.0002		7.3627	7.7726	8.1311	13.5332	13.1958	12.2514
ENSMUSG00000038742	Angptl6	5.1949	0.0001		4.8782	5.0121	4.947	10.1777	9.7176	10.0479
ENSMUSG00000107458	Gm44040	5.1696	0.0019		3.183	2.5278	3.252	8.1572	6.8616	6.7037
ENSMUSG00000096965	3300005D01Rik	5.1459	0.0025		3.183	2.2879	2.8396	6.6488	7.605	5.9783
ENSMUSG00000029380	Cxcl1	5.136	0.0018		4.4786	5.089	5.9458	11.0158	10.3249	9.1576
ENSMUSG00000086681	Gm16178	5.1358	0.0008		2.8174	2.2879	2.671	6.9646	6.1445	6.1555
ENSMUSG00000084807	Gm13073	5.1298	0.0012		2.5928	2.2879	3.1272	7.0286	6.0086	6.6846
ENSMUSG00000043388	Tmem130	5.0836	0.0022		2.3266	2.7334	3.3669	6.4292	6.4717	7.7513
ENSMUSG00000025408	Ddit3	5.0432	0.0001		7.4151	7.5662	7.6539	12.7877	12.3171	12.6276
ENSMUSG00000026166	Ccl20	5.0304	0.001		3.0117	3.0733	4.5692	7.5704	8.4442	8.1363
ENSMUSG00000037716	Ccdc33	5.0169	0.003		2.3266	2.2879	3.1272	6.331	6.9753	5.2603
ENSMUSG00000116289	Gm31342	4.9815	0.0013		2.8174	2.2879	2.48	6.7535	5.5353	6.0988
ENSMUSG00000032548	Slco2a1	4.9625	0.002		4.4786	5.6673	3.9121	9.9988	9.714	8.3877
ENSMUSG00000040828	Catsperd	4.9564	0.0115		2.3266	3.2173	2.48	7.8732	5.2032	6.0398
ENSMUSG00000107768	Gm44275	4.8921	0.0008		5.2303	5.265	5.1207	10.6752	9.9913	9.1541
ENSMUSG00000092216	Gm19345	4.8662	0.005		2.3266	3.0733	2.2599	6.8861	6.1227	4.8438
ENSMUSG00000039238	Zfp750	4.8508	0.0698		2.3266	2.2879	2.2599	8.4224	4.5279	3.2468
ENSMUSG00000022218	Tgm1	4.8399	0.006		3.183	4.5506	2.9906	8.263	8.6176	6.4555
ENSMUSG00000032715	Trib3	4.8248	0.0003		8.0998	6.6094	7.9074	12.5468	11.945	12.5191
ENSMUSG00000022705	Drd3	4.8067	0.001		2.5928	2.2879	3.1272	6.314	6.5874	5.8468
ENSMUSG00000086845	Gm13010	4.8005	0.0016		2.8174	4.0328	3.1272	8.1086	7.4736	6.7226
ENSMUSG00000027737	Slc7a11	4.8002	0.0022		8.1829	6.3529	7.9262	13.3464	11.0618	12.3703
ENSMUSG00000047528	Flacc1	4.7559	0.0005		3.336	3.0733	3.7522	7.5267	7.9522	7.1977
ENSMUSG00000059434	Gckr	4.7556	0.005		2.3266	2.2879	2.48	6.5358	5.6913	4.2558
ENSMUSG00000026959	Grin1	4.7041	0.0022		3.4743	3.3482	3.9858	8.7918	7.3849	7.2112
ENSMUSG00000023120	Ldc1	4.69	0.0033		3.183	2.5278	2.8396	7.1773	6.9133	5.4535
ENSMUSG00000025383	Il23a	4.6812	0.0011		2.5928	2.9133	2.671	5.806	6.4544	6.9154
ENSMUSG00000018906	P4ha2	4.648	0.0023		5.9526	9.6196	7.1595	12.0722	12.2618	12.3408
ENSMUSG00000117571	4933433H22Rik	4.6381	0.0017		2.3266	2.5278	2.8396	6.6351	5.5679	5.498
ENSMUSG00000034799	Unc13a	4.6351	0.0007		6.3076	7.2767	5.6149	11.5804	10.8904	10.4086
ENSMUSG00000047963	Stbd1	4.6293	0.0001		6.5459	6.5426	6.0526	10.73	11.013	11.112
ENSMUSG00000074577	Ripor3	4.6229	0.0027		5.1907	5.877	5.5188	10.792	10.4828	8.8013
ENSMUSG00000005045	Chd5	4.5857	0.0135		6.4317	6.7815	6.6711	12.4479	11.9874	9.0644
ENSMUSG00000037106	Fer1l6	4.5844	0.0474		3.183	4.4951	3.3669	9.2036	8.6673	5.153
ENSMUSG00000026069	Il1rl1	4.5818	0.0225		3.9241	5.3298	8.5017	11.2072	8.8736	11.2607
ENSMUSG00000017204	Gsdma	4.5693	0.0253		3.336	3.4682	2.671	8.0169	7.8232	4.8438
ENSMUSG00000054568	Usp17la	4.5506	0.0057		2.5928	2.2879	2.2599	5.097	6.5715	4.3559
ENSMUSG00000046056	Sbsn	4.5435	0.0039		4.0176	4.8447	4.056	9.1446	9.1433	7.2507
ENSMUSG00000020911	Krt19	4.5045	0.0011		8.5739	10.2667	7.731	13.2893	13.7554	13.0082
ENSMUSG00000026639	Lamb3	4.4973	0.0002		7.4407	7.9272	7.2521	12.4826	12.1384	11.4446
ENSMUSG00000031538	Plat	4.496	0.0007		7.7509	8.3468	8.9072	12.1396	13.8013	12.6078
ENSMUSG00000039742	Fam71f1	4.491	0.0003		5.8798	6.2892	7.1515	10.9899	10.4806	11.2542
ENSMUSG00000026271	Gpr35	4.4839	0.0074		3.183	3.2173	2.8396	8.1619	5.9847	6.1555
ENSMUSG00000087028	Gm13387	4.4738	0.0015		5.1081	4.4951	4.3068	9.2082	9.3956	7.9079
ENSMUSG00000115852	Gm52969	4.4329	0.0029		3.183	3.0733	2.8396	7.4509	5.7493	6.831
ENSMUSG00000003545	Fosb	4.4079	0.0013		4.2664	4.8884	4.1229	9.1203	8.8001	7.695
ENSMUSG00000047104	Pbp2	4.3851	0.0023		4.1881	4.2493	4.5692	9.3776	8.3205	7.5546
ENSMUSG00000020399	Havcr2	4.3824	0.0034		3.0117	2.7334	2.48	6.6213	6.3645	5.0372
ENSMUSG00000024521	Pmaip1	4.3771	0.0005		9.173	8.6237	9.7347	14.4512	13.0802	13.1734
ENSMUSG00000054855	Rnd1	4.3762	0.0004		6.5301	6.0408	7.3461	11.2759	11.2448	10.4231
ENSMUSG00000021125	Arg2	4.3699	0.0012		2.3266	2.7334	2.9906	5.9003	6.3077	5.5412
ENSMUSG00000020044	Timp3	4.3617	0.0006		3.183	3.579	2.9906	7.0494	6.5874	7.2892
ENSMUSG00000026068	Il18rap	4.36	0.0036		2.5928	3.4682	4.3068	7.0182	6.6798	8.0567
ENSMUSG00000028943	Espn	4.3438	0.0065		3.183	5.1259	2.9906	7.474	8.4917	6.6455
ENSMUSG00000038295	Atg9b	4.3361	0.0029		4.8274	6.7344	5.9641	11.0413	9.9973	9.222
ENSMUSG00000004655	Aqp1	4.3352	0.0128		3.7167	3.6819	3.6651	8.328	8.4486	5.7762
ENSMUSG00000078606	Gvin2	4.3239	0.0152		2.8174	2.5278	4.7912	5.9672	6.8351	8.2642
ENSMUSG00000015766	Eps8	4.3128	0.0087		3.6006	3.868	3.9858	8.9434	7.7959	6.2881
ENSMUSG00000026628	Atf3	4.3128	0.004		7.4823	7.6383	8.0773	13.5549	10.7233	11.8763
ENSMUSG00000003541	Ier3	4.299	0.0003		9.4724	10.4455	10.3888	15.0433	14.2283	13.99
ENSMUSG00000063522	Ly6m	4.2876	0.0009		2.5928	2.5278	2.671	5.652	6.1445	5.3111
ENSMUSG00000052955	Cpvl	4.2839	0.0092		3.183	3.3482	3.252	7.7457	7.5076	5.3601
ENSMUSG00000067219	Nipal1	4.2607	0.0009		3.336	2.9133	3.5724	7.3375	6.9005	6.4096
ENSMUSG00000027456	Sdcbp2	4.2536	0.0014		3.336	3.579	3.1272	6.4911	6.9133	7.7604
ENSMUSG00000045349	Sh2d5	4.2437	0.0032		3.8241	4.7997	4.3068	8.2894	9.1964	7.2765
ENSMUSG00000051435	Fhad1	4.2371	0.0018		4.1054	5.162	3.3669	8.511	8.2369	7.4222
ENSMUSG00000031026	Trim66	4.2315	0.0014		2.5928	2.2879	2.48	5.7565	4.8261	5.2603
ENSMUSG00000003279	Dlgap1	4.2269	0.0083		2.3266	2.9133	2.8396	6.8393	5.8321	4.6204
ENSMUSG00000006143	Upk3bl	4.2216	0.0048		3.336	4.8447	3.9121	8.2451	8.598	6.7037
ENSMUSG00000111343	Gm47175	4.2123	0.0009		3.4743	3.868	3.3669	7.379	7.7821	6.6652
ENSMUSG00000006567	Atp7b	4.1932	0.0008		4.6045	5.7876	4.056	9.1228	8.4573	8.788
ENSMUSG00000097282	5031415H12Rik	4.1884	0.0009		3.7167	2.7334	3.9121	6.9646	7.1894	6.9796
ENSMUSG00000070498	Tmem132b	4.1804	0.0606		2.5928	3.4682	2.2599	7.9413	5.2839	3.9054
ENSMUSG00000064080	Fbln2	4.1738	0.0053		4.0176	5.2315	7.6929	9.3148	9.714	10.2646
ENSMUSG00000043421	Hilpda	4.1721	0.0001		7.5227	7.6699	8.3975	12.3453	11.8897	11.9003
ENSMUSG00000086526	Gm12762	4.1693	0.0036		3.7167	4.2493	3.9858	8.8783	7.3385	7.1
ENSMUSG00000050359	Sprr1a	4.1663	0.0015		5.5132	6.399	7.1595	10.9192	9.6469	10.9462
ENSMUSG00000097098	9330111N05Rik	4.1607	0.0125		2.8174	3.579	2.8396	7.9302	5.6309	5.7396
ENSMUSG00000047428	Dlk2	4.1512	0.0071		2.5928	2.2879	2.2599	5.8302	5.2839	3.7668
ENSMUSG00000058966	Tlcd3b	4.1266	0.0368		2.5928	2.2879	2.48	6.8153	5.4678	3.2468
ENSMUSG00000055994	Nod2	4.1201	0.0049		2.3266	3.0733	2.2599	5.248	6.0782	4.5375
ENSMUSG00000026536	Ifi211	4.1164	0.0023		2.3266	2.7334	3.3669	6.0101	5.4678	6.3133
ENSMUSG00000010051	Hyal1	4.1081	0.0032		5.576	6.1704	5.2758	10.761	9.3888	8.8058
ENSMUSG00000116380	Gm39556	4.097	0.0004		3.336	4.2493	4.1229	7.5775	7.674	7.6854
ENSMUSG00000008461	Fut1	4.0853	0.0018		2.8174	2.9133	4.2481	7.1294	6.6344	6.4999
ENSMUSG00000040405	Havcr1	4.0774	0.001		2.8174	3.0733	2.9906	5.9229	6.1006	6.7778
ENSMUSG00000026674	Ddr2	4.0651	0.0025		3.183	2.9133	2.9906	7.1196	5.6913	6.1274
ENSMUSG00000038917	3930402G23Rik	4.0542	0.0013		2.3266	2.7334	2.48	5.417	5.5019	4.8438
ENSMUSG00000048078	Tenm4	4.0251	0.0032		4.8782	5.3918	5.3334	10.1635	8.719	8.3086
ENSMUSG00000021765	Fst	4.0169	0.0066		3.4743	3.2173	5.5676	8.5803	7.2205	7.3018
ENSMUSG00000024486	Hbegf	4.0007	0.0001		9.2592	9.1864	9.7962	13.3261	13.7545	13.1953
ENSMUSG00000111341	Gm47111	3.9923	0.0006		3.4743	4.7997	4.056	7.9469	7.789	7.5961
ENSMUSG00000056271	Lman1l	3.9855	0.0033		2.3266	2.9133	2.48	5.5097	5.8321	4.5375
ENSMUSG00000035775	Krt20	3.9843	0.1047		6.7229	5.7407	3.252	10.5554	9.8192	5.8468
ENSMUSG00000105826	Gm42141	3.9707	0.0019		2.3266	2.5278	2.9906	5.318	5.805	5.0372
ENSMUSG00000001227	Sema6b	3.951	0.0092		4.1054	5.3918	3.4733	8.4104	8.6673	6.5849
ENSMUSG00000027071	P2rx3	3.9441	0.02		2.8174	2.2879	3.5724	7.0899	5.6913	4.5375
ENSMUSG00000113159	Gm48771	3.9317	0.0023		2.5928	3.2173	2.2599	5.417	5.5679	5.2603
ENSMUSG00000032057	Hoatz	3.9303	0.0163		2.5928	2.5278	2.48	6.6074	5.0731	3.9054
ENSMUSG00000057098	Ebf1	3.9282	0.0007		4.3407	4.5506	4.2481	8.4499	8.1958	7.4451
ENSMUSG00000097636	Mirt1	3.9088	0.0021		4.6045	4.3774	5.8304	8.0169	9.3211	8.819
ENSMUSG00000031027	Stk33	3.9024	0.0027		2.3266	3.0733	3.3669	5.9888	5.5019	6.3133
ENSMUSG00000078566	Bnip3	3.8985	0.0006		10.2866	11.6287	10.0266	14.6278	14.4046	14.6268
ENSMUSG00000024210	Ip6k3	3.8983	0.0063		2.3266	3.7779	2.8396	6.17	6.4717	5.0963
ENSMUSG00000026872	Zeb2	3.8896	0.0008		3.4743	4.7997	4.4699	7.879	8.0763	7.6063
ENSMUSG00000033730	Egr3	3.8879	0.0159		2.3266	2.2879	2.671	6.331	4.5279	3.7668
ENSMUSG00000040380	Cbln3	3.8828	0.0031		3.336	4.5506	2.671	7.0076	6.7944	6.4096
ENSMUSG00000027435	Cd93	3.8827	0.0006		4.0176	5.265	4.3068	8.3616	8.2165	7.9486
ENSMUSG00000037580	Gch1	3.8818	0.0003		4.2664	4.1806	4.4176	7.9133	8.1427	7.6563
ENSMUSG00000040435	Ppp1r15a	3.8587	0.0001		9.6026	9.6954	9.6105	13.8884	13.0207	13.5912
ENSMUSG00000118257	9630014M24Rik	3.8266	0.0011		2.8174	3.4682	3.4733	6.1317	6.8484	6.4327
ENSMUSG00000032589	Bsn	3.8152	0.0108		2.8174	3.9527	3.1272	7.7136	6.0553	5.5412
ENSMUSG00000006411	Nectin4	3.8106	0.0393		2.3266	3.7779	2.8396	7.6674	4.8261	4.9755
ENSMUSG00000085105	Gm12758	3.7753	0.0029		3.8241	5.1259	3.8344	8.4144	7.7109	6.9796
ENSMUSG00000027015	Cybrd1	3.7694	0.0035		3.0117	2.9133	2.2599	5.806	5.0269	5.2077
ENSMUSG00000053581	Zfand2a	3.7686	0.0008		9.4474	9.2939	9.6719	14.2969	12.9214	12.5459
ENSMUSG00000003955	Fam162a	3.7638	0.0002		9.2853	10.3432	9.7625	13.6684	13.5091	13.5379
ENSMUSG00000115406	Gm49300	3.7627	0.0244		2.3266	2.2879	2.2599	6.1317	3.9684	3.2468
ENSMUSG00000035697	Arhgap45	3.7601	0.0101		4.6045	5.0121	5.3614	9.7222	8.7513	7.1427
ENSMUSG00000024846	Cst6	3.7551	0.0013		2.8174	2.7334	3.4733	6.1317	6.1227	5.6635
ENSMUSG00000052837	Junb	3.7493	0.0007		9.0456	9.658	10.831	13.614	13.6193	13.6121
ENSMUSG00000027611	Procr	3.7453	0.0029		2.3266	2.2879	2.671	4.326	4.7712	5.3601
ENSMUSG00000032487	Ptgs2	3.7391	0.0017		6.6518	6.4726	7.052	11.3664	10.0997	9.7926
ENSMUSG00000035105	Egln3	3.7369	0.0041		9.7881	11.1529	8.3941	14.0531	13.6158	12.8729
ENSMUSG00000058420	Syt17	3.7295	0.01		2.3266	3.868	3.9858	5.652	6.7805	6.9479
ENSMUSG00000095457	Gvin-ps5	3.7284	0.0085		2.5928	2.5278	4.2481	6.1121	5.3603	6.6455
ENSMUSG00000018774	Cd68	3.7212	0.0009		5.722	6.501	6.3466	10.4227	9.9471	9.1645
ENSMUSG00000101549	Gm29630	3.7161	0.0053		4.5429	4.0328	5.4937	8.0987	7.4211	9.2869
ENSMUSG00000041120	Nbl1	3.7151	0.0136		4.3407	5.3918	4.6164	9.7556	7.8164	7.1705
ENSMUSG00000051335	Gfod1	3.7059	0.0025		5.7495	6.1525	6.0526	9.8473	10.3684	8.5863
ENSMUSG00000020892	Aloxe3	3.6875	0.0481		3.183	2.5278	2.671	7.4817	4.7141	4.1482
ENSMUSG00000066952	Myo1h	3.6857	0.0014		2.5928	2.5278	2.48	5.318	4.9793	4.6988
ENSMUSG00000022483	Col2a1	3.6794	0.0135		2.3266	2.2879	2.48	5.8773	3.641	4.2558
ENSMUSG00000037447	Arid5a	3.6729	0.001		4.8782	4.9308	5.4937	8.643	8.1154	9.2741
ENSMUSG00000029410	Ppef2	3.6705	0.0032		2.3266	2.7334	2.9906	5.8302	4.9793	4.9755
ENSMUSG00000087341	0610040F04Rik	3.6658	0.0019		2.5928	2.5278	2.48	5.015	5.397	4.5375
ENSMUSG00000117485	Gm19696	3.6443	0.003		3.9241	4.1086	3.4733	7.8379	7.0464	6.2625
ENSMUSG00000079033	Mef2b	3.6429	0.0059		2.3266	3.0733	2.671	5.6246	5.6614	4.3559
ENSMUSG00000085055	Gm15958	3.6425	0.0079		2.5928	2.5278	4.2481	6.4758	5.4329	5.8468
ENSMUSG00000090066	1110002E22Rik	3.6424	0.0092		4.9746	5.6673	7.052	10.5991	8.4659	9.379
ENSMUSG00000015533	Itga2	3.6422	0.0005		6.4818	6.1163	5.8503	9.5655	10.2453	9.3244
ENSMUSG00000042622	Maff	3.6306	0.0001		8.4948	9.0147	9.2139	12.8236	12.5993	12.2392
ENSMUSG00000028970	Abcb1b	3.6157	0.0028		3.336	3.3482	3.9121	7.4509	6.3458	6.1555
ENSMUSG00000096035	Odaph	3.6038	0.0143		3.4743	3.7779	4.6164	6.3809	6.7944	8.7654
ENSMUSG00000045027	Prss22	3.5983	0.0103		2.3266	4.7051	2.8396	6.314	5.9104	5.8119
ENSMUSG00000032776	Mctp2	3.5918	0.0221		2.3266	3.3482	2.2599	4.3924	6.2883	4.2558
ENSMUSG00000038729	Pakap	3.5853	0.0004		3.8241	4.0328	4.2481	7.2685	7.3849	7.3018
ENSMUSG00000071042	Rasgrp3	3.5783	0.0083		3.4743	3.579	6.1032	7.2417	8.267	7.5546
ENSMUSG00000045868	Gvin1	3.5652	0.0108		3.0117	3.4682	4.9096	6.151	6.8484	8.0037
ENSMUSG00000026414	Tnnt2	3.5588	0.0022		3.9241	4.3774	4.947	7.196	7.7109	8.5014
ENSMUSG00000037033	Clca3b	3.5535	0.0016		2.8174	3.2173	3.5724	6.2793	6.3829	5.6635
ENSMUSG00000019960	Dusp6	3.5486	0.0001		10.4145	10.4582	10.1471	13.7986	13.9486	13.9328
ENSMUSG00000085976	Gm13816	3.5385	0.0029		2.3266	2.2879	2.9906	4.9282	4.7141	4.6988
ENSMUSG00000005089	Slc1a2	3.5323	0.0207		2.5928	2.5278	3.3669	6.728	4.3889	5.153
ENSMUSG00000094018	S100a2	3.5078	0.0021		2.3266	2.2879	2.48	4.6311	4.5926	4.0319
ENSMUSG00000068874	Selenbp1	3.5044	0.0014		8.5506	9.326	7.6874	12.2077	12.5387	11.2863
ENSMUSG00000017724	Etv4	3.5042	0.0007		8.3314	6.5831	7.8444	10.8778	11.1665	11.136
ENSMUSG00000030717	Nupr1	3.4956	0.0005		4.8782	5.3612	5.4682	8.2451	8.9027	8.7654
ENSMUSG00000034855	Cxcl10	3.4933	0.1187		4.6045	4.5506	6.1197	11.2737	6.9005	6.8822
ENSMUSG00000022707	Gbe1	3.4909	0.0001		9.1447	8.6173	8.9167	12.4768	12.3476	12.3165
ENSMUSG00000037868	Egr2	3.4886	0.0201		3.7167	3.7779	2.671	7.5988	5.4329	5.5412
ENSMUSG00000027977	Ndst3	3.4432	0.0013		4.7202	4.0328	4.9835	8.3365	7.6284	7.3989
ENSMUSG00000025515	Muc2	3.4403	0.0219		3.336	3.0733	2.48	6.5934	5.6913	4.1482
ENSMUSG00000050395	Tnfsf15	3.433	0.0039		2.5928	3.4682	3.7522	6.5061	6.1006	5.5412
ENSMUSG00000013846	St3gal1	3.4264	0.011		7.3082	7.619	6.8595	11.7624	11.0517	9.0792
ENSMUSG00000070313	Pate14	3.4246	0.0014		2.8174	2.7334	2.9906	5.6788	5.2032	5.3601
ENSMUSG00000110537	Gm4316	3.4208	0.0047		2.5928	2.2879	2.48	5.1362	4.5926	3.9054
ENSMUSG00000102893	Gm37855	3.4137	0.0426		2.5928	2.9133	3.3669	7.1294	4.0629	5.6239
ENSMUSG00000090576	Gm17055	3.4114	0.0036		2.5928	2.9133	2.2599	4.8827	4.5279	5.0372
ENSMUSG00000027994	Mcub	3.4111	0.0013		3.4743	4.6554	3.7522	6.8032	7.2905	6.9952
ENSMUSG00000116114	Gm35853	3.4098	0.0329		5.0205	6.4289	3.6651	9.2288	8.6292	6.4999
ENSMUSG00000034765	Dusp5	3.4093	0.0005		7.9359	8.0621	8.2924	10.872	12.0478	11.5982
ENSMUSG00000006494	Pdk1	3.3987	0.0023		10.0745	11.7495	9.6451	14.1992	13.8185	13.6737
ENSMUSG00000046318	Ccbe1	3.3882	0.0045		8.0564	7.6762	10.2813	12.5301	11.9434	11.8182
ENSMUSG00000001021	S100a3	3.3868	0.0023		3.7167	4.2493	5.019	7.0698	7.3572	8.1222
ENSMUSG00000006462	A530013C23Rik	3.3829	0.0047		2.8174	4.2493	3.7522	6.997	6.5874	5.8468
ENSMUSG00000112544	Gm48089	3.3822	0.0071		2.3266	3.3482	2.2599	4.9282	4.46	4.9755
ENSMUSG00000004558	Ndrg2	3.3755	0.0254		2.3266	3.0733	3.7522	5.8539	4.46	6.7037
ENSMUSG00000067203	H2-K2	3.3708	0.0042		3.336	3.4682	4.3068	7.4273	6.1006	6.4327
ENSMUSG00000022769	Sdf2l1	3.3611	0.0004		8.2615	8.3777	9.0387	12.4951	11.6042	11.7089
ENSMUSG00000049985	Ankrd55	3.3546	0.0059		3.0117	2.9133	4.4176	6.4449	5.6614	6.6846
ENSMUSG00000032238	Rora	3.3528	0.0011		5.2303	6.5831	5.5188	9.4318	9.116	8.5391
ENSMUSG00000082247	Gm16074	3.3438	0.0076		2.5928	3.9527	2.8396	5.0566	6.1227	6.0696
ENSMUSG00000039126	Prune2	3.3369	0.0073		4.5429	5.051	5.1207	8.798	8.5211	6.7778
ENSMUSG00000040511	Pvr	3.3139	0.0002		9.7167	9.8289	10.0212	13.5951	13.227	12.7262
ENSMUSG00000102419	Gm36940	3.3074	0.0037		3.9241	4.4951	3.5724	6.331	7.6889	6.9154
ENSMUSG00000021751	Acox2	3.3049	0.0016		6.9174	6.1345	7.6021	10.8005	9.6957	9.9847
ENSMUSG00000043811	Rtn4r	3.3002	0.006		3.0117	2.9133	3.3669	6.5211	5.6309	4.9112
ENSMUSG00000048373	Fgfbp1	3.2919	0.0009		7.0226	5.8552	7.1754	10.3252	9.9014	9.55
ENSMUSG00000003032	Klf4	3.2916	0.0009		8.4068	9.075	8.0345	12.5003	11.5919	11.2839
ENSMUSG00000004105	Angptl2	3.284	0.0031		5.6064	5.8552	6.3325	9.3817	9.8158	8.1711
ENSMUSG00000080115	Eef1akmt3	3.2838	0.0053		2.5928	3.0733	3.252	4.8358	5.7493	6.0398
ENSMUSG00000057069	Ero1b	3.2798	0.0006		7.8559	8.1136	7.6253	11.7644	10.9725	10.6434
ENSMUSG00000030103	Bhlhe40	3.2698	0.0002		10.8153	11.0509	10.836	14.6574	14.0502	13.8413
ENSMUSG00000059900	Tmem40	3.264	0.0196		3.183	4.0328	2.2599	5.6246	6.0553	4.6988
ENSMUSG00000034394	Lif	3.2626	0.0008		8.5854	8.69	9.1491	12.8662	11.5088	11.8768
ENSMUSG00000037428	Vgf	3.2539	0.004		2.3266	2.7334	2.671	5.1745	4.5279	4.3559
ENSMUSG00000059668	Krt4	3.2519	0.0711		4.1054	4.2493	3.5724	8.8783	6.6946	4.8438
ENSMUSG00000048388	Fam171b	3.2504	0.0015		3.9241	3.579	3.6651	7.0596	6.4368	6.1555
ENSMUSG00000057321	Usp17ld	3.2487	0.0065		2.8174	2.2879	2.2599	4.2564	4.879	3.9054
ENSMUSG00000039236	Isg20	3.236	0.0016		5.2303	6.2395	5.3614	8.9709	9.146	8.0641
ENSMUSG00000112636	Gm47223	3.2356	0.004		3.0117	2.9133	2.48	5.097	5.5353	4.6204
ENSMUSG00000038412	Higd1a	3.2352	0.0001		10.0745	10.5964	10.6163	13.6159	13.5941	13.8103
ENSMUSG00000116617	Gm49767	3.2308	0.0043		2.3266	2.7334	2.48	4.2564	4.3889	5.0963
ENSMUSG00000110697	Gm31718	3.2294	0.0246		3.183	3.2173	4.4699	7.7393	6.0553	5.2603
ENSMUSG00000028217	Cdh17	3.2252	0.017		2.5928	3.579	2.671	5.731	6.0086	4.1482
ENSMUSG00000057836	Xlr3a	3.2065	0.0415		2.5928	2.5278	2.48	5.1362	5.6913	3.0214
ENSMUSG00000036499	Eea1	3.2015	0.0016		10.9385	10.5478	10.4921	15.0022	13.5021	13.1247
ENSMUSG00000001281	Itgb7	3.1913	0.0053		2.5928	2.2879	2.48	4.8358	4.46	3.7668
ENSMUSG00000040829	Zmynd15	3.189	0.0216		3.183	3.2173	3.1272	7.1098	4.7141	5.3601
ENSMUSG00000019997	Ccn2	3.1882	0.001		10.0921	9.7659	10.7975	13.1758	12.8705	14.1855
ENSMUSG00000031486	Adgra2	3.1806	0.0242		2.3266	3.7779	3.4733	6.314	5.9847	4.4496
ENSMUSG00000026864	Hspa5	3.1728	0.0002		13.5118	13.489	14.0343	17.0786	16.6845	16.8196
ENSMUSG00000105402	Gm3716	3.1603	0.0006		6.0881	6.6857	6.5548	10.0356	9.2725	9.3671
ENSMUSG00000046169	Adamts6	3.1507	0.0389		3.183	3.579	5.2461	5.8302	6.4011	8.4682
ENSMUSG00000026726	Cubn	3.1501	0.001		4.7202	5.3918	6.23	8.5624	8.3583	8.6616
ENSMUSG00000020695	Mrc2	3.1457	0.0131		2.8174	4.2493	2.9906	6.5792	6.0322	4.9112
ENSMUSG00000042745	Id1	3.1399	0.0001		7.3082	7.1921	7.4861	10.4395	10.6614	10.2517
ENSMUSG00000043289	Mei4	3.139	0.0105		3.6006	2.2879	3.6651	5.6246	5.2839	5.5831
ENSMUSG00000052302	Tbc1d30	3.1332	0.0018		2.8174	3.2173	2.8396	5.248	5.3226	5.4535
ENSMUSG00000046186	Cd109	3.1323	0.0014		4.8782	6.1163	6.6933	9.0806	8.8374	9.0383
ENSMUSG00000107198	Gm19619	3.1209	0.0374		2.3266	2.9133	2.2599	5.3848	4.6546	3.0214
ENSMUSG00000114493	Gm47071	3.1204	0.012		2.3266	3.0733	2.671	5.417	4.93	3.9054
ENSMUSG00000089849	Runx2os2	3.1192	0.0068		2.3266	2.2879	2.2599	4.6311	3.5129	3.6134
ENSMUSG00000036533	Cdc42ep3	3.1144	0.0029		5.5132	6.2562	7.0173	8.6998	9.4985	9.933
ENSMUSG00000020108	Ddit4	3.1112	0.0013		10.2449	11.5924	10.4625	14.476	13.776	13.4257
ENSMUSG00000037509	Arhgef4	3.1016	0.0031		4.6045	4.972	3.8344	7.9302	7.1361	6.8135
ENSMUSG00000097134	1110002J07Rik	3.0985	0.0096		2.3266	2.7334	2.671	5.3848	4.2351	4.0319
ENSMUSG00000044330	Gm9790	3.0983	0.0025		3.0117	3.2173	2.671	5.1745	5.5353	5.153
ENSMUSG00000097028	Ptgs2os	3.0892	0.006		3.0117	2.5278	3.252	5.731	5.2032	4.6204
ENSMUSG00000109695	Gm31166	3.0812	0.0065		4.0176	4.604	2.9906	7.0076	6.4544	5.9783
ENSMUSG00000028341	Nr4a3	3.0789	0.1608		3.183	4.0328	2.2599	7.7329	4.93	3.2468
ENSMUSG00000038155	Gstp2	3.0757	0.0025		2.8174	3.3482	3.3669	5.9452	5.6614	5.2603
ENSMUSG00000028121	Bcar3	3.073	0.0023		9.026	8.7084	7.9262	12.1229	12.0344	10.6582
ENSMUSG00000020151	Ptprr	3.0726	0.002		3.4743	3.3482	3.1272	6.0923	5.9847	5.3601
ENSMUSG00000086631	Gm12784	3.0593	0.0037		4.0176	4.4375	3.7522	7.312	7.0464	6.0094
ENSMUSG00000020901	Pik3r5	3.0547	0.0066		3.4743	3.4682	3.9858	6.5504	6.9133	5.3111
ENSMUSG00000004371	Il11	3.0444	0.002		4.2664	4.3148	4.3632	7.3205	6.5057	7.5961
ENSMUSG00000097081	Gm10425	3.0416	0.0018		5.15	4.4375	6.0002	8.4104	7.9273	7.9881
ENSMUSG00000027956	Tmem144	3.0415	0.0012		8.778	7.5795	9.3193	11.7255	11.4324	11.6577
ENSMUSG00000061397	Krt79	3.032	0.0488		3.4743	2.7334	2.671	6.5061	5.2839	3.6134
ENSMUSG00000056758	Hmga2	3.0319	0.0007		10.0731	9.3939	9.5404	13.3728	12.552	12.193
ENSMUSG00000030000	Add2	3.0197	0.0364		3.183	2.2879	2.671	5.731	4.8261	3.4417
ENSMUSG00000026479	Lamc2	3.0193	0.013		9.501	10.8439	8.0815	13.2525	12.7302	11.4942
ENSMUSG00000032726	Bmp8a	3.0168	0.0152		3.183	4.0328	3.252	6.9863	6.0086	4.9112
ENSMUSG00000030093	Wnt7a	3.0147	0.0004		9.5836	9.802	10.1896	13.4388	12.7655	12.4637
ENSMUSG00000041798	Gck	3.0142	0.0292		3.7167	5.2978	2.8396	6.0722	7.549	5.7762
ENSMUSG00000026480	Ncf2	3.0135	0.0084		2.5928	2.7334	2.9906	4.2564	5.0269	5.6239
ENSMUSG00000024395	Lims2	2.9967	0.0123		3.7167	3.579	3.7522	7.4352	5.805	5.498
ENSMUSG00000041168	Lonp1	2.9947	0.0001		11.5489	11.829	11.7552	14.775	14.6865	14.6829
ENSMUSG00000110498	A630001O12Rik	2.9921	0.0142		2.8174	2.2879	3.1272	5.5097	4.2351	4.4496
ENSMUSG00000032322	Pstpip1	2.9891	0.0059		2.3266	3.0733	2.671	4.9723	4.3889	4.6204
ENSMUSG00000026354	Lct	2.9874	0.0356		2.5928	3.9527	3.252	6.7408	5.7206	4.2558
ENSMUSG00000024778	Fas	2.9817	0.0699		3.336	2.2879	4.056	7.0076	4.6546	4.4496
ENSMUSG00000042216	Sgsm1	2.9729	0.0409		3.336	3.6819	2.48	6.2617	5.8587	3.9054
ENSMUSG00000045679	Pqlc3	2.9725	0.0017		6.9884	6.2562	6.3325	9.9948	9.4921	8.7654
ENSMUSG00000117446	Gm35551	2.9684	0.0033		2.8174	3.7779	3.1272	5.806	5.6614	5.3111
ENSMUSG00000034205	Loxl2	2.9662	0.0109		2.8174	3.3482	3.7522	6.6351	5.2839	5.153
ENSMUSG00000032359	Ctsh	2.9658	0.0015		7.9478	8.1273	6.9266	10.9136	10.8701	9.9749
ENSMUSG00000085282	Gm15663	2.9636	0.0037		4.4786	4.604	5.2158	8.3153	6.9874	7.3633
ENSMUSG00000111825	Gm10646	2.9599	0.0039		3.6006	2.9133	3.5724	6.0923	5.2839	5.9783
ENSMUSG00000110239	Gm45620	2.9589	0.0093		3.0117	2.7334	3.7522	4.8358	6.1006	5.5831
ENSMUSG00000108804	Gm30437	2.9406	0.0107		2.8174	2.2879	2.671	4.1063	4.1515	5.2077
ENSMUSG00000032515	Csrnp1	2.9384	0.0018		7.3082	7.5526	7.9587	11.3325	10.2863	9.9808
ENSMUSG00000026107	Nabp1	2.9359	0.0004		8.8874	8.7206	9.03	12.2559	11.3516	11.8497
ENSMUSG00000110404	Rnf223	2.9254	0.0048		3.183	3.579	2.9906	5.7815	6.0086	4.9112
ENSMUSG00000108472	Gm45212	2.9195	0.003		3.336	3.6819	4.3068	5.9452	6.7093	6.3861
ENSMUSG00000032374	Plod2	2.9194	0.0009		9.3983	10.3953	9.6691	13.182	12.9431	12.1404
ENSMUSG00000001946	Esam	2.9129	0.0029		3.336	3.0733	3.1272	5.9003	5.397	5.0963
ENSMUSG00000019850	Tnfaip3	2.9086	0.0008		8.7579	8.2285	9.1491	12.0108	11.0767	11.7917
ENSMUSG00000097363	Gm26717	2.9011	0.0348		3.336	3.3482	3.1272	7.0494	5.2839	4.3559
ENSMUSG00000041827	Oasl1	2.8971	0.0222		5.803	6.2225	4.2481	9.0398	8.3905	6.831
ENSMUSG00000106739	Gm43499	2.8959	0.0124		2.8174	2.2879	2.2599	3.749	4.7141	3.7668
ENSMUSG00000001627	Ifrd1	2.8957	0.0004		9.8177	9.5068	10.3094	13.2392	12.5735	12.5469
ENSMUSG00000061815	Rufy4	2.8908	0.0101		3.0117	2.5278	2.671	5.1745	4.93	3.9054
ENSMUSG00000062151	Unc13c	2.8906	0.0115		6.577	6.5289	5.3614	9.6271	9.4024	7.6758
ENSMUSG00000080152	H3f4	2.8904	0.12		3.0117	2.7334	2.9906	3.4076	5.0731	7.3512
ENSMUSG00000062296	Trank1	2.8822	0.0007		7.9117	7.5321	7.2219	10.8028	10.4678	9.9208
ENSMUSG00000114285	Gm47773	2.8809	0.0223		3.4743	3.2173	2.2599	4.5167	5.6309	4.6204
ENSMUSG00000097651	4930461G14Rik	2.8787	0.0021		8.5739	8.513	7.5051	11.5371	11.301	10.2838
ENSMUSG00000023067	Cdkn1a	2.8786	0.0061		10.7504	10.7923	9.6774	14.3249	13.4915	12.0831
ENSMUSG00000110266	Gm32742	2.8759	0.0099		2.5928	2.5278	2.671	5.1362	4.3889	3.7668
ENSMUSG00000023951	Vegfa	2.8637	0.0004		10.3764	11.0906	10.0408	13.3729	13.3677	13.3774
ENSMUSG00000108563	Gm44686	2.8624	0.0142		2.3266	3.3482	3.1272	5.6246	4.7712	4.4496
ENSMUSG00000016552	Foxred2	2.86	0.1347		2.5928	3.7779	2.48	6.8746	4.93	3.0214
ENSMUSG00000005087	Cd44	2.8588	0.0002		9.2302	9.0392	9.2023	12.3858	11.9673	11.7095
ENSMUSG00000010751	Tnfrsf22	2.8545	0.0021		7.8995	7.5113	7.1354	10.6458	10.8135	9.5043
ENSMUSG00000055632	Hmcn2	2.8535	0.0239		5.4135	5.8552	6.136	10.0601	7.9584	7.5651
ENSMUSG00000032261	Sh3bgrl2	2.8456	0.0006		9.7948	9.6892	9.4175	12.8308	12.8098	11.8182
ENSMUSG00000026822	Lcn2	2.8411	0.0003		8.2945	8.3816	7.6707	10.9805	10.7981	11.0367
ENSMUSG00000029120	Ppp2r2c	2.8373	0.0721		2.5928	3.0733	2.48	5.9229	4.879	3.0214
ENSMUSG00000031886	Ces2e	2.8369	0.0095		2.5928	2.7334	2.2599	4.7371	3.9684	3.9054
ENSMUSG00000079173	Zan	2.8309	0.0165		5.4475	4.972	4.5692	8.5147	8.0126	6.2625
ENSMUSG00000006445	Epha2	2.826	0.0001		11.168	11.1456	11.4921	14.0787	14.1386	14.0911
ENSMUSG00000020184	Mdm2	2.8233	0.0009		11.2395	10.8236	11.0418	14.5773	13.8855	13.1598
ENSMUSG00000036944	Tmem71	2.8219	0.0005		5.8546	5.265	5.4937	8.446	8.2113	8.0934
ENSMUSG00000050335	Lgals3	2.8182	0.0005		11.5518	11.8406	10.8521	14.3182	14.3964	14.0218
ENSMUSG00000031770	Herpud1	2.8158	0.0003		10.2057	9.9639	10.2442	13.1151	12.4886	13.2718
ENSMUSG00000024190	Dusp1	2.8144	0.002		7.6811	8.4812	8.9947	11.922	10.8545	10.892
ENSMUSG00000000628	Hk2	2.8096	0.0008		11.6055	11.828	12.5521	15.3356	14.4502	14.6585
ENSMUSG00000066278	Vps37b	2.8093	0.0006		9.5624	9.7949	9.3317	12.9708	12.3269	11.8433
ENSMUSG00000117764	Gm50143	2.8011	0.008		2.5928	2.2879	2.8396	3.9387	4.5279	4.4496
ENSMUSG00000081137	BC022960	2.7989	0.0046		3.336	4.5506	4.8317	6.6889	7.1252	6.5217
ENSMUSG00000025791	Pgm1	2.7982	0.0004		10.2437	11.0521	10.0938	13.3252	13.3454	13.1389
ENSMUSG00000028758	Kif17	2.7975	0.1449		3.4743	4.1806	2.671	6.6488	6.9994	3.2468
ENSMUSG00000055926	Gm14137	2.7962	0.0036		4.3407	6.1704	5.2158	7.9957	8.1958	7.544
ENSMUSG00000085511	Gm11738	2.7949	0.0109		2.5928	2.7334	2.8396	5.318	4.5926	3.9054
ENSMUSG00000020889	Nr1d1	2.793	0.1449		7.6302	8.0086	6.0526	11.923	10.626	7.1144
ENSMUSG00000072623	Zfp9	2.79	0.0006		5.7495	5.642	6.388	8.8162	8.4529	8.7191
ENSMUSG00000097779	4833407H14Rik	2.7894	0.0576		3.7167	2.5278	2.2599	5.5967	4.5279	3.4417
ENSMUSG00000024427	Spry4	2.7888	0.0023		6.6518	5.7876	5.3049	8.378	9.1133	8.2961
ENSMUSG00000017390	Aldoc	2.7886	0.0011		6.817	7.5458	6.3743	9.8234	9.9014	9.2286
ENSMUSG00000021118	Plek2	2.7882	0.0061		5.0205	4.7532	5.4422	7.8963	8.4398	6.7596
ENSMUSG00000003865	Gys1	2.7823	0.001		10.2497	11.0424	9.6885	13.3868	13.0856	12.8763
ENSMUSG00000030730	Atp2a1	2.7807	0.016		2.3266	3.2173	3.3669	4.4559	4.9793	5.5831
ENSMUSG00000028645	Slc2a1	2.7797	0.0009		12.5904	12.971	11.7513	15.4419	15.3164	14.9423
ENSMUSG00000097715	Gpr137b-ps	2.7757	0.0003		8.9598	8.7681	8.8242	11.8429	11.8571	11.1785
ENSMUSG00000084989	Crocc2	2.7756	0.0507		4.1054	4.7997	5.1848	8.8696	7.1789	5.6635
ENSMUSG00000111324	Gm31410	2.7739	0.0048		4.0176	3.868	4.6164	7.3872	6.3829	6.21
ENSMUSG00000024268	Celf4	2.7731	0.002		5.6064	4.6554	5.8503	7.8078	8.4398	7.8576
ENSMUSG00000104701	Gm42555	2.7716	0.0441		3.0117	2.2879	3.9858	5.5393	4.0629	5.6239
ENSMUSG00000052415	Tchh	2.7708	0.0078		2.8174	3.579	2.671	5.2834	5.2839	4.5375
ENSMUSG00000114687	Gm5452	2.7655	0.0187		3.0117	3.3482	2.2599	4.4559	5.2032	4.3559
ENSMUSG00000048572	Tmem252	2.7644	0.083		3.0117	2.5278	2.2599	4.7371	5.4329	2.7541
ENSMUSG00000073771	Btbd19	2.762	0.002		7.9239	7.8409	7.8143	11.4482	10.145	10.2088
ENSMUSG00000032502	Stac	2.761	0.02		2.3266	2.7334	2.2599	4.7371	3.8673	3.2468
ENSMUSG00000088552	Mir1957a	2.752	0.0043		3.8241	4.7997	3.3669	6.2074	6.5553	6.4555
ENSMUSG00000104140	Gm37140	2.7478	0.005		2.5928	2.5278	2.671	4.326	4.6546	4.0319
ENSMUSG00000085569	Gm12602	2.7472	0.0007		5.15	5.7407	5.705	8.1714	8.4442	7.9645
ENSMUSG00000007379	Dennd2c	2.7372	0.0016		6.3798	6.2728	6.1032	9.3999	9.0397	8.2642
ENSMUSG00000101191	Gm28809	2.736	0.0004		5.803	5.5084	5.9083	8.4064	8.2818	8.5391
ENSMUSG00000032942	Ucp3	2.7353	0.0444		3.9241	3.868	3.7522	7.6674	6.187	4.6988
ENSMUSG00000013089	Etv5	2.7335	0.0008		8.7847	7.4175	7.9356	10.6509	10.8595	10.745
ENSMUSG00000097998	Gm27019	2.7313	0.0021		3.4743	4.1086	3.4733	6.0518	5.8848	6.1555
ENSMUSG00000030584	Dpf1	2.7301	0.0007		6.1513	5.9407	6.3325	8.8696	9.127	8.4169
ENSMUSG00000048285	Frmd6	2.7241	0.0002		9.2424	9.3977	9.7949	12.1962	12.3966	12.0489
ENSMUSG00000025064	Col17a1	2.7233	0.1062		2.5928	2.5278	2.2599	5.2834	4.5926	2.4258
ENSMUSG00000020620	Abca8b	2.7202	0.0468		3.6006	2.9133	2.8396	6.6074	4.1515	4.6988
ENSMUSG00000091635	Vmn2r13	2.7192	0.0077		3.0117	2.7334	2.8396	5.318	4.2351	4.8438
ENSMUSG00000025020	Slit1	2.7133	0.0069		3.9241	4.4951	3.1272	6.3809	6.4011	5.6239
ENSMUSG00000067212	H2-T23	2.7075	0.0025		4.5429	6.2225	5.2461	7.9957	8.0303	7.7876
ENSMUSG00000078249	Hmga1b	2.7064	0.0172		3.183	3.6819	2.48	5.0566	5.6614	4.4496
ENSMUSG00000093042	Mir3109	2.7063	0.0038		4.1881	4.1086	3.1272	6.1121	6.1445	6.0398
ENSMUSG00000008136	Fhl2	2.7053	0.001		7.8933	7.9167	9.1789	10.9512	11.0781	11.1447
ENSMUSG00000105528	Gm43519	2.7014	0.0029		4.4113	3.4682	4.3632	6.2617	6.7382	6.4555
ENSMUSG00000030641	Ddias	2.7004	0.0024		9.3631	8.5677	9.075	12.5609	11.5182	11.0291
ENSMUSG00000116321	Gm49522	2.6954	0.0046		3.4743	3.3482	3.3669	5.097	6.1227	5.6635
ENSMUSG00000064267	Hvcn1	2.6941	0.056		4.8782	5.1971	2.9906	7.6874	6.8616	5.2603
ENSMUSG00000036611	Eepd1	2.6934	0.0015		4.7202	5.1259	4.947	7.7329	7.7109	6.9479
ENSMUSG00000117270	Gm49953	2.6915	0.0092		2.5928	3.0733	2.8396	4.2564	4.7141	5.3601
ENSMUSG00000034457	Eda2r	2.6909	0.0057		9.3316	8.2412	8.4891	12.2348	11.4994	10.3415
ENSMUSG00000036067	Slc2a6	2.6902	0.0018		5.4475	5.265	4.947	8.263	7.7255	7.2765
ENSMUSG00000063229	Ldha	2.6879	0.0015		13.198	14.3307	12.9254	16.2974	16.2426	16.0167
ENSMUSG00000087159	Gm15246	2.6879	0.0074		2.8174	4.1806	3.4733	5.3518	5.8848	5.8808
ENSMUSG00000021196	Pfkp	2.6802	0.0003		11.5832	11.6064	10.9486	14.2822	13.8613	14.0682
ENSMUSG00000035818	Plekhs1	2.6772	0.0291		5.2303	6.7102	4.7064	7.7201	9.3796	7.1427
ENSMUSG00000022952	Runx1	2.6769	0.001		8.7545	9.5669	9.9845	12.5329	11.9427	11.924
ENSMUSG00000021306	Gpr137b	2.6733	0.0011		10.1435	10.0944	9.5631	13.1315	12.8401	11.8737
ENSMUSG00000034845	Plvap	2.6728	0.0029		3.6006	3.2173	3.9858	5.9003	6.0322	5.6239
ENSMUSG00000115882	Gm5481	2.6692	0.0057		3.336	3.0733	2.671	4.8358	5.3226	4.7731
ENSMUSG00000043822	Adamtsl5	2.6667	0.0013		5.722	6.8713	5.8102	8.496	8.9864	8.779
ENSMUSG00000005148	Klf5	2.6646	0.0008		9.7289	9.8106	9.2386	12.7419	12.3878	11.6583
ENSMUSG00000028755	Cda	2.6553	0.0129		5.8546	6.8713	5.6149	9.0705	9.3933	7.4899
ENSMUSG00000097146	Gm4211	2.6533	0.029		2.5928	2.5278	2.2599	4.7371	4.0629	3.0214
ENSMUSG00000026880	Stom	2.6519	0.0008		8.8624	9.2979	8.6734	11.6987	12.05	11.0423
ENSMUSG00000025969	Nrp2	2.6423	0.0015		7.7509	8.774	8.0475	10.9629	11.2858	10.237
ENSMUSG00000086719	Gm16275	2.6407	0.0206		3.336	2.5278	2.2599	3.9387	4.3889	4.6204
ENSMUSG00000117310	Ptp4a1	2.6407	0.0067		2.5928	2.7334	3.3669	4.8358	4.93	4.5375
ENSMUSG00000044471	Lncpint	2.6352	0.0002		7.8239	7.5252	7.5724	10.322	10.3626	10.0793
ENSMUSG00000022051	Bnip3l	2.6346	0.0008		11.3145	12.253	11.2535	14.3047	14.4903	13.9645
ENSMUSG00000021214	Akr1c18	2.6338	0.0062		2.8174	2.7334	2.48	4.6311	4.314	4.1482
ENSMUSG00000021281	Tnfaip2	2.6323	0.0004		11.0049	10.8734	10.8459	13.8946	13.76	13.0067
ENSMUSG00000117648	Gm32282	2.6315	0.0158		2.8174	3.2173	2.2599	4.3924	4.6546	4.1482
ENSMUSG00000017943	Gdap1l1	2.6314	0.0306		2.3266	3.7779	3.1272	5.731	4.3889	4.6988
ENSMUSG00000102475	Gm37246	2.6299	0.087		2.3266	2.2879	2.48	2.558	4.46	4.9112
ENSMUSG00000104917	Gm43289	2.6285	0.001		4.2664	4.2493	4.1229	6.7021	6.5057	6.5641
ENSMUSG00000086754	Gm16098	2.6268	0.0105		2.8174	2.7334	2.671	4.1833	4.2351	5.2603
ENSMUSG00000023393	Slc17a9	2.6264	0.0353		3.6006	3.7779	3.252	6.9537	5.6309	4.4496
ENSMUSG00000025650	Col7a1	2.6207	0.0182		4.8782	6.0978	8.2024	8.9013	9.0656	9.0644
ENSMUSG00000086665	Gm13067	2.6156	0.0015		4.4113	4.7051	4.7494	7.2417	7.2807	6.6256
ENSMUSG00000090248	Gm14027	2.6085	0.0373		2.3266	3.2173	2.9906	5.5097	4.6546	3.6134
ENSMUSG00000027313	Chac1	2.607	0.0009		8.3762	7.5729	8.8091	10.722	10.7843	11.0904
ENSMUSG00000103183	Gm37090	2.6062	0.007		5.343	6.1163	4.3632	7.2507	8.262	7.714
ENSMUSG00000074945	Olfr1314	2.6053	0.0233		4.1054	2.9133	3.3669	6.0311	6.0322	4.4496
ENSMUSG00000050022	Amz1	2.6001	0.0011		4.9746	5.2315	4.8712	7.4509	7.8164	7.1842
ENSMUSG00000046814	Gchfr	2.5972	0.0101		2.5928	2.9133	3.8344	4.8827	5.2032	5.0963
ENSMUSG00000096655	1700065D16Rik	2.5969	0.005		2.8174	2.7334	3.252	5.015	4.7141	4.6988
ENSMUSG00000108736	Gm45151	2.5965	0.0084		4.5429	3.9527	3.7522	7.0899	6.3077	5.6239
ENSMUSG00000025432	Avil	2.5958	0.0013		5.343	5.8985	5.1531	8.1331	7.605	8.1711
ENSMUSG00000111079	Gm47112	2.5817	0.0042		4.0176	3.0733	3.6651	5.5683	5.7206	5.914
ENSMUSG00000020788	Atp2a3	2.579	0.0164		4.1054	3.579	3.5724	6.9755	5.5679	5.2077
ENSMUSG00000018920	Cxcl16	2.5781	0.0039		7.0995	7.425	6.9996	10.5867	9.3377	9.2053
ENSMUSG00000041920	Slc16a6	2.5758	0.0126		6.0881	5.4801	5.683	9.304	7.3479	7.9881
ENSMUSG00000086003	B230206L02Rik	2.5752	0.0011		4.8782	5.089	4.5692	7.3625	7.3849	7.0107
ENSMUSG00000005125	Ndrg1	2.5719	0.0036		12.8906	13.5146	11.8916	15.8746	15.3329	14.8668
ENSMUSG00000023034	Nr4a1	2.5698	0.0051		6.3798	6.2728	5.4422	8.887	8.9122	7.6365
ENSMUSG00000078653	Cntd1	2.5623	0.007		3.7167	4.4951	4.1868	6.8976	6.6946	5.6239
ENSMUSG00000025473	Adam8	2.5618	0.0128		5.6362	6.1879	6.3605	8.9267	9.3187	7.3267
ENSMUSG00000046711	Hmga1	2.5602	0.0007		10.2901	10.3481	9.6221	12.76	12.9767	12.2189
ENSMUSG00000075569	Rsph10b	2.5573	0.0123		3.0117	3.868	3.1272	6.0311	5.2839	4.6988
ENSMUSG00000055493	Epm2a	2.5564	0.007		3.8241	4.8447	5.0537	7.3459	6.3077	7.2377
ENSMUSG00000110730	Gm19385	2.5496	0.0372		2.3266	2.5278	3.3669	4.9723	4.5926	3.4417
ENSMUSG00000050931	Sgms2	2.5493	0.0003		10.5894	10.3618	9.9178	13.0665	12.8136	12.6512
ENSMUSG00000028862	Map3k6	2.548	0.0069		5.4135	5.1971	4.056	7.7457	6.6798	7.2765
ENSMUSG00000064344	mt-Tm	2.5479	0.0268		3.183	2.2879	3.5724	4.7873	4.314	5.2077
ENSMUSG00000084616	NA	2.5469	0.0025		4.8782	4.972	3.9858	7.1391	6.8616	6.8135
ENSMUSG00000118367	Gm50277	2.5413	0.0135		4.5429	4.3148	4.6164	7.902	6.3458	6.1555
ENSMUSG00000100158	Gm28119	2.538	0.0254		2.3266	3.2173	2.9906	4.1833	5.3603	4.1482
ENSMUSG00000040675	Mthfd1l ENSMUSG00000040675	2.5376	0.0001		10.0718	9.9106	10.1073	12.6611	12.359	12.7003
ENSMUSG00000074065	Gm10617	2.5321	0.0053		3.0117	3.3482	2.8396	5.1745	5.0269	4.6204
ENSMUSG00000076448	Mir763	2.5311	0.011		2.5928	2.5278	3.4733	4.575	4.6546	4.5375
ENSMUSG00000072812	NA	2.53	0.0163		8.006	8.8366	7.8931	11.7044	11.1545	9.3879
ENSMUSG00000038418	Egr1	2.5297	0.0102		9.5468	8.9284	8.3247	12.6676	10.9596	10.71
ENSMUSG00000043488	Frmd8os	2.5293	0.011		3.8241	4.4951	3.7522	7.1098	5.6614	5.9465
ENSMUSG00000065610	Mir29a	2.527	0.0331		3.7167	4.5506	5.4682	6.4911	6.2284	8.2707
ENSMUSG00000010067	Rassf1	2.5248	0.0005		9.0372	9.2837	9.2832	12.2399	11.6415	11.3254
ENSMUSG00000034773	Hrob	2.5217	0.0009		8.0286	7.425	8.0773	10.8217	10.207	10.0138
ENSMUSG00000008129	Brme1	2.5211	0.0098		4.9272	5.4513	5.5914	8.7096	7.0579	7.4106
ENSMUSG00000062753	AI413582	2.517	0.0011		7.0339	6.7463	7.3461	9.1056	9.9173	9.6271
ENSMUSG00000079575	Rbpj-ps3	2.5166	0.0106		3.0117	3.0733	3.5724	5.6788	5.3603	4.4496
ENSMUSG00000085274	BC046401	2.5113	0.0041		4.1054	3.2173	3.9858	5.9229	5.7493	6.0696
ENSMUSG00000010362	Rdm1	2.5102	0.0006		7.6595	7.9167	7.731	10.0524	10.7105	10.046
ENSMUSG00000037855	Zfp365	2.509	0.0082		5.9992	5.642	6.3466	9.2197	8.5001	7.4677
ENSMUSG00000021123	Rdh12	2.5071	0.0044		5.6362	4.8884	5.3614	8.0888	7.9645	6.8989
ENSMUSG00000022346	Myc	2.5064	0.0003		9.7306	10.1118	9.9178	12.5735	12.0874	12.6398
ENSMUSG00000097021	4933433G15Rik	2.5049	0.0023		4.1054	4.1806	3.7522	6.3972	6.3458	5.8808
ENSMUSG00000028642	Tmem269	2.5038	0.0218		2.5928	3.3482	2.2599	4.4559	4.0629	4.1482
ENSMUSG00000021411	Pxdc1	2.5034	0.0002		8.3629	8.22	8.6565	10.853	11.1123	10.7916
ENSMUSG00000019852	Arfgef3	2.5028	0.0002		8.8337	8.9258	9.3562	11.6307	11.5088	11.5147
ENSMUSG00000086775	Snhg7os	2.4972	0.0046		4.1881	5.051	5.3889	6.9863	7.0231	7.8142
ENSMUSG00000060621	Nkpd1	2.4939	0.0163		2.5928	4.0328	2.9906	5.417	4.879	4.8438
ENSMUSG00000075704	Txnrd2	2.492	0.0017		9.3961	8.8505	9.3838	12.4682	11.2889	11.365
ENSMUSG00000109366	Gm44698	2.4888	0.0079		3.183	3.2173	3.252	4.8358	5.8321	4.8438
ENSMUSG00000109299	Gm45164	2.488	0.0163		2.5928	2.5278	2.8396	4.9282	3.9684	3.7668
ENSMUSG00000026456	Cyb5r1	2.4873	0.0005		9.3429	9.1442	9.6047	11.7577	11.5094	12.2998
ENSMUSG00000042678	Myo15	2.487	0.0367		3.4743	4.1086	3.4733	6.8153	5.9604	4.4496
ENSMUSG00000051022	Hs3st1	2.487	0.0245		5.2303	5.4219	3.8344	7.2144	7.9398	6.0398
ENSMUSG00000016239	Lonrf3	2.4857	0.0004		8.4619	7.8901	7.8786	10.7428	10.6163	10.255
ENSMUSG00000002983	Relb	2.4831	0.0003		7.9655	8.5025	8.6366	10.9171	10.7634	10.9106
ENSMUSG00000024610	Cd74	2.4816	0.0284		2.5928	3.0733	2.2599	3.5306	4.314	4.6204
ENSMUSG00000022176	Rem2	2.4802	0.0022		4.1881	4.1806	4.8712	6.4911	6.9133	6.7037
ENSMUSG00000044499	Hs3st5	2.4741	0.0654		3.0117	2.2879	2.8396	4.7371	5.0269	3.0214
ENSMUSG00000038602	Slc35f1	2.4736	0.0722		5.5449	4.7997	9.1551	9.3693	8.7263	8.7191
ENSMUSG00000012519	Mlkl	2.4673	0.0008		7.2026	6.501	6.7994	9.1661	9.5826	9.027
ENSMUSG00000035678	Tnfsf9	2.4671	0.0029		6.0443	6.6857	5.3614	8.598	8.6598	7.9406
ENSMUSG00000046133	C130073F10Rik	2.4657	0.0109		3.4743	2.9133	3.4733	5.318	5.7493	4.5375
ENSMUSG00000102380	Gm38140	2.4654	0.0066		3.8241	4.0328	4.6164	6.9755	5.8321	6.3133
ENSMUSG00000041842	Fhdc1	2.4649	0.0006		7.6883	7.6383	8.5692	10.4512	10.4284	10.446
ENSMUSG00000014905	Dnajb9	2.4641	0.0003		8.6956	8.8697	8.508	11.3659	10.8644	11.228
ENSMUSG00000086443	4933421A08Rik	2.4608	0.0343		3.183	3.0733	2.8396	5.5393	3.7586	5.3601
ENSMUSG00000105356	Gm42603	2.4599	0.0024		5.4807	5.3612	6.1032	7.654	8.0067	8.5603
ENSMUSG00000049128	Ivl	2.4566	0.06		3.6006	2.7334	2.48	5.7815	3.7586	4.1482
ENSMUSG00000057454	Lypd3	2.4546	0.1421		3.183	4.7532	2.48	6.2968	5.9356	3.4417
ENSMUSG00000039191	Rbpj	2.4537	0.0003		10.9636	10.7352	10.7447	13.5446	13.3628	12.9309
ENSMUSG00000034640	Tiparp	2.448	0.001		10.012	9.6245	10.0386	12.6304	12.7311	11.691
ENSMUSG00000010095	Slc3a2	2.4453	0.0002		11.8606	11.6762	11.8416	13.9797	14.2992	14.4564
ENSMUSG00000022598	Psca	2.4439	0.0614		3.336	3.9527	3.6651	6.4758	6.5224	4.0319
ENSMUSG00000087141	Plcxd2	2.4348	0.0046		9.976	9.7949	10.0277	13.4828	11.641	12.0168
ENSMUSG00000039384	Dusp10	2.4346	0.0003		8.8655	8.5372	8.9493	11.4961	11.1179	11.0442
ENSMUSG00000085389	1700003M07Rik	2.4325	0.0823		2.8174	3.0733	2.671	5.5683	5.0269	3.0214
ENSMUSG00000056501	Cebpb	2.4314	0.0005		8.006	8.2454	8.5572	10.8111	10.3924	10.9331
ENSMUSG00000087684	1200007C13Rik	2.4237	0.0445		2.3266	2.9133	3.252	5.4486	4.0629	3.7668
ENSMUSG00000063011	Msln	2.4231	0.0011		11.0995	11.8803	11.3509	14.0889	14.2609	13.2909
ENSMUSG00000115249	Gm49085	2.4204	0.0029		3.4743	3.3482	3.7522	5.4794	5.6309	5.498
ENSMUSG00000028680	Plk3	2.4198	0.0046		7.7711	7.2518	7.2596	10.3742	10.0885	8.9206
ENSMUSG00000042751	Nmnat2	2.4198	0.0133		6.5459	5.9198	5.9823	9.192	8.8473	7.2892
ENSMUSG00000113015	Gm6296	2.4196	0.0193		3.183	2.5278	3.5724	4.3924	5.3603	4.8438
ENSMUSG00000031450	Grk1	2.4194	0.0603		3.4743	2.5278	3.1272	6.0722	4.2351	3.9054
ENSMUSG00000004936	Map2k1	2.4076	0.0003		10.2425	10.8173	10.3281	13.0156	12.877	12.7477
ENSMUSG00000005057	Sh2b2	2.4057	0.0106		3.4743	3.7779	3.9121	5.8773	6.4191	4.9755
ENSMUSG00000097812	Gm26812	2.4017	0.0348		3.0117	2.7334	3.1272	3.749	5.0269	5.5412
ENSMUSG00000041642	Kif21b	2.401	0.0086		3.183	4.1806	3.7522	6.2617	5.5353	5.3601
ENSMUSG00000039911	Spsb1	2.3984	0.0014		7.0888	7.8847	7.7575	9.5031	10.2591	10.2021
ENSMUSG00000115505	Gm9247	2.3955	0.0087		3.0117	3.0733	2.8396	4.3924	5.2032	4.5375
ENSMUSG00000111394	Gm49759	2.3934	0.0005		8.5428	9.4127	8.8736	11.3388	11.5234	11.1707
ENSMUSG00000087381	Gm16008	2.3933	0.0018		5.9287	6.079	5.5676	7.8379	8.6408	8.0715
ENSMUSG00000109708	Gm45809	2.3933	0.0053		4.1054	3.7779	3.9121	5.9003	6.5874	5.5412
ENSMUSG00000027397	Slc20a1	2.3923	0.0006		9.5131	9.304	10.0558	12.3715	11.9546	11.7617
ENSMUSG00000085395	Gm13056	2.3876	0.0027		5.8546	5.877	5.6379	7.694	8.7263	7.8997
ENSMUSG00000086290	Snhg12	2.3865	0.001		8.006	8.081	8.69	10.3027	10.6105	11.0794
ENSMUSG00000097440	Gm6277	2.3861	0.034		2.3266	3.0733	2.2599	3.9387	4.314	3.2468
ENSMUSG00000115762	Gm34907	2.3843	0.0354		3.183	3.7779	2.48	5.5967	4.46	4.3559
ENSMUSG00000084399	Gm15666	2.3815	0.0172		3.0117	2.5278	3.4733	4.326	5.1611	4.6204
ENSMUSG00000102278	Gm37145	2.3811	0.0032		4.4113	4.4951	4.7494	6.2793	7.0231	7.0411
ENSMUSG00000041801	Phlda3	2.3752	0.0025		9.8306	9.2038	10.0792	12.8547	11.6918	11.7271
ENSMUSG00000031987	Egln1	2.3724	0.001		10.6232	11.1343	10.1581	13.3455	13.0768	12.6429
ENSMUSG00000108456	4732496C06Rik	2.3657	0.021		4.8782	4.7051	4.1229	7.7265	6.5874	5.7396
ENSMUSG00000097960	A330074K22Rik	2.3626	0.0045		4.0176	4.972	5.2461	6.8153	7.2807	6.7957
ENSMUSG00000015312	Gadd45b	2.3602	0.0057		8.203	9.2316	10.3013	11.7788	11.5649	11.5633
ENSMUSG00000087633	Gm14455	2.3586	0.017		2.3266	2.9133	2.9906	4.6311	4.0629	4.0319
ENSMUSG00000019916	P4ha1	2.3577	0.0003		11.8031	12.3512	11.9526	14.5551	14.3609	14.295
ENSMUSG00000031557	Plekha2	2.3574	0.0008		8.9947	9.669	9.8342	12.1486	11.485	11.9805
ENSMUSG00000097039	Pvt1	2.3538	0.0005		7.983	8.2028	7.9632	10.7171	10.4015	10.0516
ENSMUSG00000021668	Polk	2.3528	0.0012		9.1343	8.8778	8.69	11.7597	11.3143	10.6619
ENSMUSG00000032724	Abtb2	2.3492	0.0006		7.4151	8.2538	7.7416	10.3326	10.1463	9.9631
ENSMUSG00000112937	Gm17746	2.3447	0.0117		3.336	2.7334	2.8396	5.0566	4.314	4.4496
ENSMUSG00000110165	Btf3-ps18	2.3442	0.0106		2.5928	3.4682	2.9906	4.6311	4.5926	4.9112
ENSMUSG00000097921	Gm26576	2.3437	0.0517		3.0117	2.5278	3.5724	5.5393	4.879	3.6134
ENSMUSG00000103622	Gm38391	2.3437	0.007		4.3407	5.3918	5.0537	7.5988	6.4888	7.3633
ENSMUSG00000029102	Hgfac	2.3388	0.0005		10.3282	10.3314	9.8317	12.8554	12.4517	12.2202
ENSMUSG00000018800	Abca5	2.3332	0.0048		4.7202	5.2978	4.7912	7.4586	7.43	6.4327
ENSMUSG00000090173	Fbxw10	2.3329	0.0095		2.5928	3.2173	3.3669	4.8827	4.7141	4.6988
ENSMUSG00000053746	Ptrh1	2.3292	0.0006		7.7372	7.9008	8.3907	10.0841	10.4239	10.5501
ENSMUSG00000028542	Slc6a9	2.3288	0.0006		9.5111	9.1798	8.593	11.4966	11.3714	11.371
ENSMUSG00000090582	Gm17024	2.3283	0.0011		4.7748	5.2315	4.947	7.2507	7.1789	7.1286
ENSMUSG00000044005	Gls2	2.3259	0.0029		4.8274	4.9308	5.6149	7.556	7.549	6.8822
ENSMUSG00000089371	Mir1938	2.3203	0.0051		3.0117	3.4682	3.1272	4.9723	5.0731	4.9112
ENSMUSG00000025006	Sorbs1	2.3201	0.0029		8.4619	8.0429	8.1672	11.0745	10.7394	9.7403
ENSMUSG00000116270	Gm1600	2.3188	0.271		3.336	3.579	2.2599	6.4911	5.0731	2.4258
ENSMUSG00000081562	Gm11575	2.3169	0.0182		2.5928	2.5278	2.48	3.4076	4.3889	3.9054
ENSMUSG00000082016	Pgam1-ps2	2.3167	0.0128		2.8174	3.4682	3.5724	5.015	5.6309	4.6204
ENSMUSG00000021890	Eaf1	2.3129	0.0002		10.2303	10.2842	10.2338	12.5372	12.8347	12.3412
ENSMUSG00000031490	Eif4ebp1	2.3115	0.0004		10.8194	10.5672	11.2656	13.0871	13.1271	13.3931
ENSMUSG00000000706	Btn1a1	2.311	0.0223		2.5928	3.9527	2.9906	5.2117	4.879	4.4496
ENSMUSG00000096917	2500002B13Rik	2.311	0.0056		5.4135	6.2562	6.0353	8.8696	7.7681	7.7604
ENSMUSG00000098433	Mir6391	2.3051	0.0406		2.5928	2.7334	2.8396	3.4076	4.3889	5.153
ENSMUSG00000085929	Gm13421	2.304	0.0013		5.2303	4.9308	5.6606	7.5193	7.4121	7.5226
ENSMUSG00000031381	Piga	2.2986	0.0009		8.5349	8.7971	8.1869	11.1285	10.9024	10.3415
ENSMUSG00000021701	Plk2	2.2982	0.0032		12.5052	12.4583	13.5338	15.7048	14.5868	15.127
ENSMUSG00000098055	Gm26947	2.2964	0.0241		2.8174	2.7334	2.671	4.4559	4.7712	3.4417
ENSMUSG00000002602	Axl	2.2963	0.0035		11.0629	11.8364	12.5653	13.8427	14.5412	13.9838
ENSMUSG00000109460	Gm45591	2.2915	0.0089		3.7167	3.0733	4.056	5.8302	5.4329	5.2077
ENSMUSG00000024883	Rin1	2.2898	0.0003		10.8813	10.8452	11.068	12.9042	13.4383	13.3414
ENSMUSG00000011148	Adssl1	2.2878	0.0614		4.4113	4.1806	3.1272	6.5211	6.4191	4.3559
ENSMUSG00000105466	Gm42998	2.2806	0.0171		4.1881	3.4682	4.9096	5.731	6.1006	6.9318
ENSMUSG00000042349	Ikbke	2.2795	0.0016		8.3495	8.5542	8.3702	11.3112	10.5967	10.1732
ENSMUSG00000049580	Tsku	2.2724	0.0002		9.6833	9.5984	9.3562	11.8156	11.8714	11.7731
ENSMUSG00000004791	Pgf	2.271	0.064		2.3266	3.2173	2.9906	4.1833	5.397	3.4417
ENSMUSG00000025225	Nfkb2	2.2655	0.0005		10.4443	10.928	10.8964	12.6644	13.3001	13.1236
ENSMUSG00000006205	Htra1	2.2652	0.01		3.7167	4.3774	4.5204	6.8861	6.1006	5.6635
ENSMUSG00000023175	Bsg	2.2631	0.0002		13.3104	13.5324	13.6586	15.705	15.6958	15.9112
ENSMUSG00000031530	Dusp4	2.2624	0.0006		9.9977	9.5685	10.2656	12.2427	11.9427	12.4535
ENSMUSG00000019055	Plod1	2.2579	0.005		9.2759	10.87	9.3193	12.2377	12.2484	11.7821
ENSMUSG00000074625	Arhgap40	2.2568	0.1225		4.0176	4.7051	3.4733	7.3205	6.539	4.0319
ENSMUSG00000045319	Proser2	2.2536	0.0026		8.57	9.4331	8.3941	11.1309	11.5015	10.5112
ENSMUSG00000051457	Spn	2.2528	0.0319		3.183	3.4682	4.1229	5.097	6.5057	4.7731
ENSMUSG00000003746	Man1a	2.2524	0.0013		10.0947	9.4441	10.2619	12.6873	12.0895	11.8138
ENSMUSG00000020048	Hsp90b1	2.2518	0.001		13.9902	13.4942	13.8399	16.611	15.8483	15.6728
ENSMUSG00000021798	Ldb3	2.2485	0.0508		2.8174	3.3482	2.671	5.5967	3.7586	4.1482
ENSMUSG00000010830	Kdelr3	2.2468	0.001		7.6883	8.4267	7.4861	9.9974	10.3403	9.9651
ENSMUSG00000040249	Lrp1	2.2462	0.0149		7.1623	7.6447	7.5422	10.4326	10.0414	8.4849
ENSMUSG00000114053	Gm35330	2.2455	0.0348		3.336	3.0733	3.6651	6.2074	4.46	4.6988
ENSMUSG00000107741	Gm2011	2.24	0.0035		4.1054	4.7997	4.3068	6.5649	6.6344	6.0988
ENSMUSG00000041180	Hectd2	2.2385	0.0038		4.6635	3.7779	4.3632	6.2438	6.2284	6.338
ENSMUSG00000118386	Gm50149	2.2376	0.0243		2.5928	2.2879	2.48	3.4076	3.3724	4.2558
ENSMUSG00000062070	Pgk1	2.2373	0.0005		12.9478	13.5977	13.0233	15.4799	15.5081	15.3255
ENSMUSG00000021250	Fos	2.2344	0.001		7.2026	7.6699	6.8496	9.3735	9.7012	9.2645
ENSMUSG00000015981	Stk32c	2.2319	0.0647		3.336	3.4682	3.4733	6.2793	5.5353	3.7668
ENSMUSG00000053714	4732471J01Rik	2.2314	0.0009		6.4317	6.9963	6.6024	8.798	9.1648	8.6616
ENSMUSG00000100291	2310069B03Rik	2.2297	0.051		3.8241	3.6819	4.3068	6.997	5.9604	4.5375
ENSMUSG00000044017	Adgrd1	2.2267	0.1003		2.5928	3.2173	3.4733	5.8302	5.0731	3.2468
ENSMUSG00000073198	Bnip3l-ps	2.2258	0.0055		4.4786	4.4375	3.7522	5.8773	6.539	6.183
ENSMUSG00000044313	Mab21l3	2.223	0.1066		5.1081	3.7779	5.3889	8.4104	5.3226	6.6256
ENSMUSG00000041974	Spidr	2.2215	0.0004		9.3896	9.1599	9.5661	11.847	11.6096	11.3446
ENSMUSG00000103731	Gm17530	2.2195	0.0223		2.3266	2.9133	2.9906	4.4559	4.1515	3.7668
ENSMUSG00000024164	C3	2.2194	0.0271		3.183	3.3482	3.4733	4.8358	6.0782	4.3559
ENSMUSG00000052525	Spdya	2.2163	0.0057		3.8241	3.6819	4.1229	5.4794	6.2284	5.7021
ENSMUSG00000097145	9230114K14Rik	2.2162	0.0164		6.5615	6.1704	6.0697	9.4803	7.9948	7.6563
ENSMUSG00000032231	Anxa2	2.2154	0.0004		13.4339	13.7006	13.3599	15.7449	16.0053	15.4312
ENSMUSG00000085156	Snhg15	2.2122	0.0018		8.3405	7.9219	8.9969	11.0013	10.2802	10.641
ENSMUSG00000045817	Zfp36l2	2.2071	0.0003		11.3676	11.2393	11.1635	13.4449	13.7523	13.2277
ENSMUSG00000098146	Gm26935	2.2036	0.0073		3.0117	3.6819	3.3669	5.248	5.1611	4.8438
ENSMUSG00000069808	Tlcd3a	2.2028	0.0003		7.9888	7.7491	7.9402	10.1407	10.1368	9.9769
ENSMUSG00000029385	Ccng2	2.1971	0.0023		10.362	11.4494	10.8083	13.4053	13.2954	12.5548
ENSMUSG00000007035	Msh5	2.1969	0.0086		6.4146	5.9613	6.7259	9.3381	8.201	7.9243
ENSMUSG00000044098	Rsbn1	2.1967	0.0003		9.7427	9.669	9.394	12.02	11.8208	11.5646
ENSMUSG00000079334	Naa80	2.1907	0.0129		7.4491	7.8901	7.5237	10.8698	9.3658	9.0937
ENSMUSG00000027356	Fermt1	2.1828	0.0622		5.803	7.1657	8.1869	8.0326	9.4985	10.3984
ENSMUSG00000028654	Mycl	2.1822	0.0066		3.7167	3.3482	3.9121	5.731	5.5679	5.0963
ENSMUSG00000106310	Gm43523	2.1812	0.0539		4.1054	2.5278	4.1868	4.685	5.5997	5.5831
ENSMUSG00000043192	Gpi-ps	2.181	0.0262		4.6635	5.1259	3.3669	5.8773	6.9005	6.0696
ENSMUSG00000023272	Creld2	2.174	0.001		9.8063	9.7541	9.7937	12.5697	11.6164	11.7165
ENSMUSG00000029814	Igf2bp3	2.1732	0.072		2.5928	2.5278	3.7522	5.417	3.8673	3.9054
ENSMUSG00000026435	Slc45a3	2.1731	0.0044		5.0205	5.4219	4.8317	7.1583	7.5971	6.6256
ENSMUSG00000026809	Spaca9	2.1708	0.0101		3.7167	4.7532	3.7522	5.9672	6.3645	5.5412
ENSMUSG00000032575	Manf	2.1689	0.0004		10.6527	10.4326	10.9024	12.9221	12.5553	13.0391
ENSMUSG00000008384	Sertad1	2.1682	0.0004		9.0372	9.2755	9.2253	11.0996	11.6662	11.295
ENSMUSG00000031098	Syt8	2.1681	0.0013		7.7164	8.6962	8.5752	10.6885	10.627	10.2088
ENSMUSG00000109864	Eid3	2.168	0.002		6.3621	6.2395	6.6372	8.1619	8.558	9.0078
ENSMUSG00000111933	Gm36660	2.1674	0.019		3.7167	3.0733	3.3669	5.652	5.1611	4.3559
ENSMUSG00000085250	Gm15234	2.1663	0.0117		4.1881	3.0733	3.9858	5.7815	5.3603	5.4535
ENSMUSG00000054342	Kcnn4	2.1659	0.16		3.0117	4.8447	2.8396	5.9003	6.2284	3.4417
ENSMUSG00000091712	Sec14l5	2.1657	0.1744		3.183	2.7334	2.8396	6.1317	4.46	2.7541
ENSMUSG00000074415	Mir100hg	2.1637	0.0102		6.7229	7.6125	6.518	9.0731	9.8125	8.2898
ENSMUSG00000042807	Hecw2	2.1633	0.0645		3.0117	3.0733	2.8396	5.015	5.2441	3.2468
ENSMUSG00000088015	Mir1932	2.1629	0.0186		3.183	2.5278	2.671	3.9387	4.1515	4.4496
ENSMUSG00000100599	1700120C14Rik	2.1587	0.0056		4.4113	4.7051	5.1848	7.2236	6.7944	6.2881
ENSMUSG00000062785	Kcnc3	2.1586	0.0182		4.3407	5.8552	3.9858	6.6488	7.0807	6.3133
ENSMUSG00000103364	Gm38157	2.1543	0.0251		3.0117	3.6819	3.5724	4.3924	5.6913	5.498
ENSMUSG00000116604	Gm49745	2.1511	0.0266		2.3266	2.9133	2.671	3.5306	4.314	3.9054
ENSMUSG00000028545	Bend5	2.1497	0.0017		8.3762	8.4451	7.9216	10.8771	10.3427	9.9002
ENSMUSG00000117975	Itprip	2.147	0.0007		9.9643	9.9614	10.3448	12.4055	12.5454	11.8
ENSMUSG00000000223	Drp2	2.1469	0.0558		4.2664	4.604	4.4176	7.4969	6.5874	4.9112
ENSMUSG00000037679	Inf2	2.1375	0.0029		9.2993	9.206	8.8712	11.7199	11.5629	10.4894
ENSMUSG00000110341	Gm45424	2.1373	0.1285		3.183	4.1086	2.2599	5.3848	4.6546	3.4417
ENSMUSG00000023952	Gtpbp2	2.1318	0.0002		10.2242	10.4363	10.2376	12.4733	12.2683	12.5725
ENSMUSG00000104114	Gm37297	2.1317	0.0081		3.183	3.7779	4.1229	5.3848	5.6309	5.4535
ENSMUSG00000044006	Cilp2	2.1316	0.0775		2.8174	3.2173	2.2599	4.7371	3.2167	4.1482
ENSMUSG00000097792	Gm27042	2.1282	0.0082		3.336	3.868	3.4733	5.1362	5.1178	5.7396
ENSMUSG00000029576	Radil	2.1277	0.0284		2.8174	2.9133	3.1272	3.749	4.93	4.8438
ENSMUSG00000025130	P4hb	2.1246	0.0006		13.5668	13.8543	13.4831	16.1572	15.6587	15.5072
ENSMUSG00000024922	Ovol1	2.1244	0.1972		4.8782	6.8158	2.8396	6.8393	7.6284	5.0963
ENSMUSG00000033538	Casp4	2.124	0.031		5.722	4.0328	6.388	7.7071	6.8616	7.5961
ENSMUSG00000034751	Mast4	2.124	0.0138		10.2279	10.0542	9.4439	12.948	12.3084	10.8689
ENSMUSG00000002791	Pdxk-ps	2.1235	0.0091		3.7167	3.579	3.3669	5.652	5.3603	4.7731
ENSMUSG00000015962	1700016C15Rik	2.1215	0.0313		2.8174	2.9133	3.5724	4.7371	5.2839	3.9054
ENSMUSG00000047153	Khnyn	2.1205	0.0007		9.7597	10.4753	9.9342	12.3199	12.3662	11.8779
ENSMUSG00000114282	5330431K02Rik	2.1163	0.0131		4.0176	3.9527	3.7522	5.0566	6.2284	6.0094
ENSMUSG00000056055	Sag	2.1161	0.0068		4.0176	3.868	4.9835	6.2617	6.1227	6.21
ENSMUSG00000061232	H2-K1	2.1153	0.0013		10.0401	9.9264	10.7968	12.3079	12.1145	12.7148
ENSMUSG00000024661	Fth1	2.1151	0.0123		13.5766	13.5368	12.3949	15.7596	15.8868	14.2873
ENSMUSG00000098068	Gm7909	2.1096	0.0339		2.5928	3.6819	2.8396	4.1063	5.0731	4.3559
ENSMUSG00000029771	Irf5	2.1082	0.023		3.0117	2.9133	3.9858	4.8358	4.5926	5.4076
ENSMUSG00000028128	F3	2.1078	0.0004		8.9716	8.9569	9.1868	10.996	11.0219	11.4446
ENSMUSG00000110148	5830408C22Rik	2.1061	0.0049		4.1054	4.7997	4.3632	6.314	6.0553	6.7037
ENSMUSG00000044854	1700056E22Rik	2.1003	0.0065		4.4113	5.0121	5.1531	7.3708	6.4717	6.6256
ENSMUSG00000053470	Kdm3a	2.0953	0.0048		10.9985	11.7498	10.8838	14.1365	13.0304	12.7995
ENSMUSG00000026305	Lrrfip1	2.0951	0.0009		12.4864	11.6633	12.4155	14.4423	14.239	14.2034
ENSMUSG00000102148	Gm38059	2.0951	0.1422		3.183	3.2173	2.9906	5.015	6.1006	3.0214
ENSMUSG00000074305	Peak1	2.0947	0.0158		9.8672	10.0446	8.9585	12.3337	12.259	10.5672
ENSMUSG00000025196	Cpn1	2.0944	0.0107		4.0176	5.265	3.8344	6.314	6.2079	6.183
ENSMUSG00000062991	Nrg1	2.0917	0.0034		10.1266	9.2274	10.4786	12.4547	11.6634	12.0182
ENSMUSG00000108668	Gm32816	2.0874	0.1061		2.5928	2.2879	2.8396	2.7726	4.314	4.5375
ENSMUSG00000029797	Sspo	2.087	0.0933		3.336	3.868	3.252	6.4758	3.8673	5.2077
ENSMUSG00000087366	Junos	2.0812	0.0326		3.7167	3.6819	3.5724	6.314	5.2839	4.4496
ENSMUSG00000052131	Akr1b7	2.0777	0.0844		3.4743	3.868	2.2599	4.9282	4.46	4.0319
ENSMUSG00000100865	Gm9320	2.0777	0.007		4.3407	4.604	4.8317	6.0722	6.4717	7.1
ENSMUSG00000010760	Phlda2	2.0769	0.0224		3.9241	3.6819	3.5724	5.731	6.0322	4.5375
ENSMUSG00000085771	C230066G23Rik	2.0759	0.0527		2.8174	2.7334	2.9906	3.847	5.3226	3.6134
ENSMUSG00000039099	Wdr93	2.0718	0.01		3.9241	4.4951	4.7494	6.7909	6.2284	5.7396
ENSMUSG00000103696	Gm37531	2.0714	0.0078		4.4786	3.868	4.7064	5.806	6.4888	6.4096
ENSMUSG00000107477	Gm44366	2.0713	0.0128		3.0117	3.579	3.6651	4.685	5.2441	5.3601
ENSMUSG00000085457	1110046J04Rik	2.0702	0.0017		5.2303	5.642	5.3334	7.4893	7.4992	7.1427
ENSMUSG00000114409	Gm9042	2.0702	0.1221		2.5928	2.2879	2.2599	2.558	4.6546	3.2468
ENSMUSG00000036006	Ripor2	2.0685	0.001		9.3808	8.7115	9.6134	11.431	11.3725	11.1227
ENSMUSG00000110631	Gm42047	2.0654	0.0035		6.289	6.0978	6.1521	8.7418	8.0419	7.714
ENSMUSG00000039942	Ptger4	2.0636	0.001		6.251	6.2892	6.4282	8.1428	8.3395	8.6169
ENSMUSG00000115483	Gm9732	2.063	0.0383		5.15	4.7051	4.9096	7.9904	6.6648	5.7396
ENSMUSG00000026819	Slc25a25	2.0629	0.0008		9.5291	9.5277	10.0057	12.1686	11.5998	11.5194
ENSMUSG00000004864	Mapk13	2.0616	0.0312		4.4786	5.162	4.1229	6.6351	7.2509	5.4076
ENSMUSG00000097835	Gm26910	2.0591	0.0053		4.5429	4.604	5.019	7.0286	6.187	6.7037
ENSMUSG00000059040	Eno1b	2.0572	0.0185		4.3407	4.8884	4.5692	5.652	6.8747	7.1
ENSMUSG00000054409	Tmem74	2.0565	0.0142		3.9241	3.4682	4.4176	5.731	5.2441	6.2365
ENSMUSG00000042549	Map2k3os	2.0555	0.0025		4.4786	4.4375	4.7064	6.4292	6.539	6.3133
ENSMUSG00000084899	Gm15344	2.0544	0.003		4.9272	5.3918	5.3614	7.1773	6.8877	7.5546
ENSMUSG00000086997	Gm12981	2.0541	0.0096		4.8782	3.7779	4.8712	6.4292	6.5874	6.0398
ENSMUSG00000116498	Gm38563	2.054	0.0206		3.0117	2.9133	3.7522	4.685	4.46	5.2603
ENSMUSG00000009108	Gnat2	2.0521	0.026		3.8241	3.6819	3.9858	6.3972	4.7712	5.5831
ENSMUSG00000104253	Gm37174	2.0514	0.0084		4.0176	4.3148	4.5692	6.4449	5.5997	6.4555
ENSMUSG00000030659	Nucb2	2.0508	0.0008		8.6156	8.0185	8.4176	10.6777	10.2802	10.2105
ENSMUSG00000029314	Gpat3	2.0487	0.0007		6.6074	6.8821	6.6933	8.7607	8.8866	8.5863
ENSMUSG00000102349	Gm37376	2.0478	0.048		2.5928	4.2493	4.1229	5.652	4.93	5.2077
ENSMUSG00000054150	Syne3	2.0475	0.0192		8.9058	9.3613	8.056	11.3777	11.3143	9.6884
ENSMUSG00000103251	Gm37519	2.0458	0.0244		3.183	2.9133	3.3669	4.1833	5.3603	4.5375
ENSMUSG00000021025	Nfkbia	2.045	0.007		8.385	8.4006	8.4109	11.0971	10.6689	9.5043
ENSMUSG00000046223	Plaur	2.0425	0.0002		9.9317	10.1187	9.9913	12.0337	11.9829	12.1725
ENSMUSG00000090207	4930524O07Rik	2.0424	0.0435		2.8174	3.6819	3.9121	4.685	4.7141	6.0696
ENSMUSG00000020277	Pfkl	2.0419	0.0027		11.7559	12.9315	11.9216	14.2263	14.0759	14.4541
ENSMUSG00000086841	2410006H16Rik	2.0418	0.0018		10.1781	10.9901	10.7846	12.2201	12.8567	13.0216
ENSMUSG00000031273	Col4a6	2.041	0.0692		3.0117	2.5278	3.1272	5.2834	3.9684	3.4417
ENSMUSG00000048779	P2ry6	2.0386	0.0508		2.5928	2.5278	2.8396	4.7371	3.641	3.2468
ENSMUSG00000001473	Tubb6	2.0277	0.0026		10.2131	9.3457	10.6486	12.0646	12.0835	12.1678
ENSMUSG00000034825	Nrip3	2.0275	0.0027		6.2316	6.0214	5.9641	7.8199	7.8299	8.5707
ENSMUSG00000113776	Gm19327	2.0244	0.0046		5.4807	5.877	4.8317	7.0799	7.5652	7.3143
ENSMUSG00000071332	E230015B07Rik	2.0243	0.0921		2.8174	2.2879	3.4733	4.9282	3.3724	4.0319
ENSMUSG00000056749	Nfil3	2.0227	0.005		7.3266	8.1409	8.72	9.7382	10.0801	10.5501
ENSMUSG00000037362	Ccn3	2.0202	0.1479		3.183	2.7334	4.947	6.4449	4.0629	5.0372
ENSMUSG00000020407	Upp1	2.0187	0.0049		7.045	6.1879	7.6311	9.2128	8.959	8.6567
ENSMUSG00000040472	Rabggta	2.0155	0.0006		9.0893	9.1886	9.3614	11.0464	11.6106	11.0489
ENSMUSG00000073274	Gm14636	2.0142	0.0011		6.8299	6.7698	6.7151	8.5147	9.0627	8.7049
ENSMUSG00000056671	Prelid2	2.0125	0.017		3.183	2.9133	2.8396	4.7873	4.1515	4.1482
ENSMUSG00000027800	Tm4sf1	2.0122	0.0211		6.9295	6.9036	9.0036	9.418	9.4772	10.1119
ENSMUSG00000085665	Gm12059	2.0122	0.064		4.1054	2.9133	3.7522	6.2617	4.6546	4.5375
ENSMUSG00000057948	Unc13d	2.0103	0.0003		9.6689	10.0116	9.7267	11.9835	11.6807	11.7967
ENSMUSG00000078952	Lncenc1	2.0085	0.0066		4.2664	4.4951	5.2758	6.8153	6.5057	6.2881
ENSMUSG00000068744	Psrc1	2.0054	0.0016		8.9271	8.0857	8.8881	10.9697	10.505	10.4217
ENSMUSG00000108436	Gm44851	2.0054	0.0558		2.3266	2.9133	3.7522	4.5167	4.46	3.9054
ENSMUSG00000039831	Arhgap29	2.0052	0.0005		12.0537	12.0435	11.5468	13.8805	13.9975	13.8166
ENSMUSG00000117013	Gm30531	2.003	0.0436		2.5928	3.4682	2.9906	4.326	5.1178	3.7668
ENSMUSG00000105848	Gm42683	2.0005	0.0107		4.2664	4.7051	4.4699	5.6788	6.7238	6.6054
ENSMUSG00000027858	Tspan2	1.9999	0.0606		2.8174	3.0733	2.9906	5.3518	4.2351	3.4417
ENSMUSG00000011752	Pgam1	1.9995	0.0018		11.6436	12.3636	11.5187	14.1047	14.0178	13.4427
ENSMUSG00000046402	Rbp1	1.9994	0.0649		3.4743	2.2879	2.671	4.3924	3.9684	3.4417
ENSMUSG00000027713	1810062G17Rik	1.9987	0.0082		3.7167	3.868	4.6621	5.9672	5.6913	5.8808
ENSMUSG00000074340	Ovgp1	1.998	0.013		3.6006	4.3148	3.9121	5.6246	6.187	5.153
ENSMUSG00000029648	Flt1	1.9915	0.0205		3.4743	4.3774	5.0537	5.9672	5.8321	6.5431
ENSMUSG00000035179	Ppp1r32	1.991	0.0184		3.4743	3.579	3.3669	5.248	5.5353	4.3559
ENSMUSG00000040703	Cyp2s1	1.9908	0.0062		6.9295	8.1136	6.9817	9.5254	9.6181	8.7517
ENSMUSG00000112338	Gm47693	1.9906	0.0367		3.6006	3.2173	2.48	4.2564	4.6546	4.3559
ENSMUSG00000025329	Padi1	1.9898	0.16		3.7167	6.1704	4.1229	7.3205	7.2609	4.6204
ENSMUSG00000041957	Pkp2	1.9898	0.0004		9.9833	10.2268	9.9991	12.2603	12.1107	11.8351
ENSMUSG00000065904	Gm26109	1.9885	0.0073		3.7167	3.3482	3.9121	5.2834	5.2441	5.4076
ENSMUSG00000118068	Gm50275	1.9882	0.0154		2.8174	3.6819	3.4733	4.7371	4.93	4.9112
ENSMUSG00000052727	Map1b	1.9867	0.0003		10.4838	10.3801	10.6061	12.37	12.4448	12.6358
ENSMUSG00000031750	Il34	1.9857	0.0044		7.1207	8.109	6.9907	9.1661	9.8108	9.1401
ENSMUSG00000039563	2210406O10Rik	1.9852	0.0173		2.8174	3.0733	2.671	3.9387	4.314	4.2558
ENSMUSG00000086539	Gm16759	1.9851	0.0251		2.5928	2.9133	2.8396	3.6439	4.46	4.1482
ENSMUSG00000113769	5033406O09Rik	1.985	0.0339		4.1054	5.9198	3.9121	6.17	6.8747	6.2365
ENSMUSG00000047810	Ccdc88b	1.9847	0.1529		3.0117	4.5506	4.1229	6.1888	6.6497	3.7668
ENSMUSG00000035109	Shc4	1.9841	0.0213		3.7167	4.3774	3.7522	6.3645	5.0731	5.498
ENSMUSG00000097519	4930558J18Rik	1.9829	0.0019		5.6064	5.3298	5.4682	7.5119	7.465	7.0855
ENSMUSG00000031762	Mt2	1.9813	0.0508		7.0671	8.0763	8.4795	9.3423	9.0882	11.3262
ENSMUSG00000028389	Zfp37	1.9806	0.0005		8.3038	8.6683	8.2593	10.5122	10.4871	10.156
ENSMUSG00000025089	Gfra1	1.9805	0.2212		3.8241	4.972	3.252	6.8512	6.6344	3.4417
ENSMUSG00000040543	Pitpnm3	1.9801	0.001		8.6043	9.2422	8.3907	10.5814	10.799	10.7983
ENSMUSG00000104684	5430427N15Rik	1.9797	0.0732		3.336	3.3482	2.671	5.318	4.7141	3.4417
ENSMUSG00000055435	Maf	1.9789	0.0596		6.9295	6.2225	4.5204	8.6599	7.1576	7.2765
ENSMUSG00000055116	Arntl	1.9762	0.0004		8.9832	9.0367	8.5632	10.9015	10.8371	10.7565
ENSMUSG00000048065	Cyb5r2	1.9746	0.0136		4.1054	4.5506	3.4733	5.4794	6.1006	5.6239
ENSMUSG00000024359	Hspa9	1.9732	0.0008		13.7597	13.2435	13.8073	15.8434	15.424	15.4999
ENSMUSG00000026452	Syt2	1.9682	0.1827		2.3266	2.9133	3.252	5.5097	2.8436	4.1482
ENSMUSG00000003355	Fkbp11	1.9675	0.0053		4.2664	4.1806	4.3632	6.1317	5.6913	6.3133
ENSMUSG00000109541	Gm6112	1.967	0.0495		2.5928	3.2173	2.48	3.5306	3.8673	4.6204
ENSMUSG00000034731	Dgkh	1.9641	0.0021		5.722	5.6922	6.23	7.9633	7.549	7.883
ENSMUSG00000086680	Gm11592	1.9613	0.0199		3.7167	2.9133	3.1272	4.685	5.0269	4.3559
ENSMUSG00000020572	Nampt	1.9592	0.0009		11.4205	11.7569	11.0985	13.5974	13.5109	13.0843
ENSMUSG00000025092	Hspa12a	1.9573	0.1076		4.8782	5.5634	5.3334	8.7161	6.9133	5.5412
ENSMUSG00000004952	Rasa4	1.9566	0.0952		3.7167	4.4951	4.5204	6.8153	6.6648	4.3559
ENSMUSG00000022385	Gtse1	1.9555	0.0018		10.3598	9.6469	10.1176	12.4776	11.9128	11.6235
ENSMUSG00000087424	5730405O15Rik	1.9538	0.0039		4.7202	4.8447	4.8317	6.5504	6.3645	6.9952
ENSMUSG00000000627	Sema4f	1.9528	0.0791		2.3266	3.2173	3.1272	4.9723	3.9684	3.4417
ENSMUSG00000006800	Sulf2	1.9526	0.1543		7.7024	8.7913	5.9641	9.9961	10.4849	7.4565
ENSMUSG00000095115	Itpripl2	1.9514	0.0007		9.2783	9.7288	9.9319	11.4354	11.6439	11.7497
ENSMUSG00000108732	2310043P16Rik	1.9499	0.024		3.6006	3.6819	4.3632	5.731	4.879	6.1555
ENSMUSG00000062198	2700097O09Rik	1.9488	0.0022		6.9651	7.476	7.6079	8.9462	9.6602	9.3058
ENSMUSG00000084817	Gm5526	1.9487	0.0114		4.9746	4.7051	5.2461	7.1773	6.1006	7.1842
ENSMUSG00000101849	Gm28386	1.9473	0.0951		2.3266	2.2879	3.3669	3.5306	3.2167	4.4496
ENSMUSG00000063760	Rnf217	1.9453	0.0005		9.649	9.6564	9.683	11.9659	11.3685	11.5113
ENSMUSG00000118032	Gm50147	1.9433	0.1146		2.3266	2.7334	2.8396	4.7873	3.7586	2.7541
ENSMUSG00000034918	Cdhr2	1.9415	0.1744		2.5928	4.2493	2.48	4.9282	5.0269	3.0214
ENSMUSG00000039813	Tbc1d2	1.9391	0.0071		9.5874	9.8946	8.9378	11.9314	11.6793	10.6197
ENSMUSG00000011632	Pinlyp	1.9383	0.0368		3.9241	3.9527	3.3669	5.9229	5.6614	4.3559
ENSMUSG00000041515	Irf8	1.9366	0.0847		5.5132	5.8104	4.7064	7.7393	8.0819	5.498
ENSMUSG00000035673	Sbno2	1.9355	0.0006		10.8727	11.043	11.1891	13.3371	12.7589	12.8487
ENSMUSG00000025069	Gsto2	1.9317	0.0073		3.6006	3.579	4.056	5.4794	5.3603	5.2603
ENSMUSG00000016356	Col20a1	1.9313	0.0294		3.9241	4.4951	4.2481	6.6757	5.0731	6.0988
ENSMUSG00000109784	Gm45493	1.9309	0.0064		4.3407	4.4375	4.2481	5.7815	6.0086	6.5217
ENSMUSG00000024556	Me2	1.9294	0.0004		10.7002	10.5255	10.7898	12.4532	12.8229	12.5521
ENSMUSG00000086638	4930405A21Rik	1.9285	0.0326		2.8174	3.579	3.9858	4.8358	4.6546	5.5412
ENSMUSG00000031609	Sap30	1.9256	0.001		8.8592	9.1754	9.5	10.7936	11.2648	11.2958
ENSMUSG00000028300	C9orf72	1.9246	0.0006		9.2496	9.6229	9.4108	11.1616	11.6539	11.2623
ENSMUSG00000108753	Gm45094	1.9231	0.0045		4.6635	4.2493	4.3068	6.151	6.2883	5.9465
ENSMUSG00000042686	Jph1	1.9224	0.081		4.5429	3.0733	5.5188	6.2438	5.3603	6.5431
ENSMUSG00000107879	9330102E08Rik	1.9222	0.0641		4.2664	3.7779	3.7522	6.6074	5.5997	4.3559
ENSMUSG00000032558	Nphp3	1.9221	0.0013		7.2896	7.341	6.9077	9.2954	9.1352	8.7562
ENSMUSG00000028108	Ecm1	1.9202	0.007		7.2126	7.3172	7.3738	9.4397	9.7158	8.3817
ENSMUSG00000046733	Gprc5a	1.9163	0.0251		10.2266	10.0373	8.7912	12.2722	11.9677	10.5474
ENSMUSG00000040329	Il7	1.9161	0.0585		2.8174	2.9133	3.9121	5.097	3.8673	4.9755
ENSMUSG00000020388	Pdlim4	1.916	0.0792		2.8174	2.9133	2.671	5.1362	3.5129	3.4417
ENSMUSG00000040554	Aipl1	1.9158	0.0237		3.183	3.7779	3.9121	5.806	5.0269	4.6988
ENSMUSG00000030134	Rasgef1a	1.9122	0.0258		5.4135	5.089	4.7064	7.7956	6.4717	6.183
ENSMUSG00000062380	Tubb3	1.9122	0.0362		5.576	6.9963	6.1837	8.0533	9.0854	7.1427
ENSMUSG00000020354	Sgcd	1.9106	0.0287		7.9419	7.5252	6.0526	9.6098	9.116	8.2184
ENSMUSG00000025912	Mybl1	1.9101	0.0108		9.1831	8.4705	9.008	11.6705	10.651	10.0271
ENSMUSG00000024805	Pcgf5	1.9091	0.0022		10.8063	10.7019	10.1935	12.7597	12.7884	11.9122
ENSMUSG00000030522	Mtmr10	1.9056	0.0008		9.7748	9.8621	9.4373	11.431	11.9399	11.4282
ENSMUSG00000074968	Ano3	1.9044	0.0635		5.1081	4.3774	4.056	7.2144	6.2883	4.9755
ENSMUSG00000030208	Emp1	1.9035	0.0123		12.3632	11.9311	11.4714	14.2627	14.4595	12.8191
ENSMUSG00000056031	9330154J02Rik	1.9031	0.108		2.8174	2.5278	4.056	4.5167	3.641	5.3111
ENSMUSG00000036390	Gadd45a	1.8968	0.003		9.638	9.3958	9.9365	11.2748	11.2007	12.2068
ENSMUSG00000028931	Kcnab2	1.8958	0.0259		7.2707	7.9531	6.8982	9.9264	9.5483	8.1292
ENSMUSG00000069554	I830134H01Rik	1.8937	0.0277		2.5928	2.7334	3.252	3.847	4.2351	4.2558
ENSMUSG00000116771	Gm49691	1.8904	0.1448		2.5928	2.2879	2.671	4.3924	3.8673	2.4258
ENSMUSG00000105896	Gm43311	1.8895	0.0059		4.1881	4.1086	3.8344	5.5393	5.7206	5.8119
ENSMUSG00000064023	Klk8	1.8889	0.1405		2.3266	2.5278	2.48	3.4076	4.5926	2.4258
ENSMUSG00000056771	Gm10010	1.8886	0.0541		3.8241	3.9527	3.7522	6.5792	5.0269	4.6204
ENSMUSG00000005374	Tbl2	1.8881	0.0009		10.0934	10.5639	9.8564	12.2103	12.1479	11.8433
ENSMUSG00000047407	Tgif1	1.8867	0.0007		10.4092	10.5765	10.8886	12.247	12.5591	12.7503
ENSMUSG00000075701	Selenos	1.8866	0.0004		9.5251	9.4183	9.4041	11.2504	11.1824	11.5873
ENSMUSG00000035498	Cdcp1	1.8856	0.0716		4.2664	6.1345	4.5204	6.2257	7.8499	6.0696
ENSMUSG00000097418	Mir155hg	1.8839	0.0077		4.6635	3.9527	4.8317	6.1888	6.0553	6.338
ENSMUSG00000036427	Gpi1	1.8836	0.0057		13.784	14.4399	13.1615	15.6002	16.1488	15.3338
ENSMUSG00000117358	Gm31645	1.8822	0.0498		3.0117	3.6819	4.5204	4.7873	5.2032	6.0398
ENSMUSG00000105755	Gm43514	1.8819	0.0504		2.3266	3.2173	3.3669	4.0249	4.2351	4.3559
ENSMUSG00000033854	Kcnk10	1.8792	0.0123		5.065	6.0016	6.5907	7.9413	7.2905	7.9881
ENSMUSG00000034795	Ccdc122	1.8785	0.0417		5.694	4.3774	6.0353	7.556	6.2686	7.666
ENSMUSG00000048458	Inka2	1.877	0.0371		8.193	6.8493	7.4988	10.3701	8.4041	9.2677
ENSMUSG00000035504	Reep6	1.8759	0.0199		7.9239	7.8185	6.4544	9.6477	9.5111	8.4227
ENSMUSG00000082515	Gm12902	1.8754	0.0288		3.8241	3.7779	2.8396	4.8827	5.1611	4.6204
ENSMUSG00000047496	Rnf152	1.8751	0.1123		5.4807	5.2978	2.9906	6.6757	6.1006	5.4535
ENSMUSG00000056962	Jmjd6	1.8744	0.0005		10.0289	10.4482	10.3475	12.4066	12.0139	12.061
ENSMUSG00000032115	Hyou1	1.874	0.0027		12.5808	12.409	12.5003	15.1049	13.9906	14.0626
ENSMUSG00000069833	Ahnak	1.874	0.0009		15.8326	16.1546	16.2186	18.0009	18.1994	17.6623
ENSMUSG00000019301	Hsd17b1	1.8739	0.0912		3.336	4.0328	4.1229	6.7021	4.3889	5.153
ENSMUSG00000020571	Pdia6	1.8735	0.001		11.9819	11.8547	12.4675	14.3024	13.8421	13.8118
ENSMUSG00000044447	Dock5	1.8724	0.0023		9.6306	9.1008	8.8639	11.4354	11.1268	10.6185
ENSMUSG00000027605	Acss2	1.8721	0.0371		8.3806	8.0037	7.747	10.9213	10.0298	8.6269
ENSMUSG00000093979	Gm2237	1.8719	0.0153		4.5429	5.2315	5.3334	7.474	6.6344	6.2365
ENSMUSG00000021403	Serpinb9b	1.8695	0.0411		5.694	6.0601	8.1908	8.7258	8.0932	8.7745
ENSMUSG00000001156	Mxd1	1.8693	0.0368		8.8111	8.7999	8.0082	11.454	10.4796	9.161
ENSMUSG00000030256	Bhlhe41	1.8692	0.0047		9.3247	10.2321	9.5404	12.1825	11.4765	11.0785
ENSMUSG00000047501	Cldn4	1.8684	0.0183		9.8656	9.8785	11.0712	12.444	11.2226	12.7894
ENSMUSG00000050310	Rictor	1.8666	0.0026		10.8867	10.9629	10.9083	13.4828	12.6521	12.268
ENSMUSG00000106287	Gm43585	1.8656	0.0084		3.8241	3.9527	4.1868	5.3848	5.5353	5.9783
ENSMUSG00000020021	Fgd6	1.8642	0.0174		7.8559	7.9583	7.3531	9.9854	10.1053	8.5122
ENSMUSG00000049971	Glt1d1	1.8605	0.01		7.5067	7.2518	8.1229	10.0265	8.7619	9.686
ENSMUSG00000043051	Disc1	1.8601	0.0229		3.4743	3.7779	3.7522	5.8539	5.0731	4.6204
ENSMUSG00000072437	Nanos1	1.859	0.0018		8.345	8.258	8.1473	10.5363	10.0758	9.6593
ENSMUSG00000068547	Clca4a	1.8581	0.0488		3.183	2.7334	3.1272	5.097	3.8673	3.9054
ENSMUSG00000033105	Lss	1.8568	0.0287		11.7462	10.4967	12.1374	14.3197	13.047	12.6348
ENSMUSG00000117912	Gm50383	1.8564	0.0375		3.0117	3.868	2.671	4.575	4.3889	4.4496
ENSMUSG00000096948	Gm4221	1.856	0.0352		3.0117	3.4682	4.5204	4.9282	5.2032	5.4535
ENSMUSG00000113029	Gm40578	1.8557	0.0321		2.8174	3.3482	3.9858	4.8358	5.1178	4.4496
ENSMUSG00000002257	Def6	1.854	0.0109		3.6006	4.0328	3.7522	5.731	5.2032	5.0963
ENSMUSG00000085776	5430402O13Rik	1.8539	0.0364		3.0117	3.0733	4.3632	4.8827	4.8261	5.0963
ENSMUSG00000110218	Tincr	1.853	0.0478		3.7167	4.1806	3.3669	6.2257	4.7712	4.7731
ENSMUSG00000038517	Tbkbp1	1.8527	0.0483		3.0117	3.9527	3.4733	5.7815	4.5279	4.4496
ENSMUSG00000037260	Hgsnat	1.8517	0.005		10.4199	10.6741	10.3413	13.0066	12.4593	11.5698
ENSMUSG00000085589	A430078I02Rik	1.849	0.0273		3.9241	3.7779	4.3632	6.3479	4.9793	5.5412
ENSMUSG00000066632	Pgk1-rs7	1.848	0.0637		2.5928	3.0733	2.9906	3.4076	4.8261	4.2558
ENSMUSG00000112301	Gm10752	1.848	0.0237		3.0117	3.3482	3.5724	4.9723	4.2351	5.0372
ENSMUSG00000045813	Gm9801	1.8468	0.0213		3.183	4.4375	3.7522	5.3848	5.4678	5.0963
ENSMUSG00000060961	Slc4a4	1.8466	0.0084		6.6663	8.4415	7.8883	9.4727	9.6374	9.4768
ENSMUSG00000026142	Rhbdd1	1.8434	0.0012		10.3191	9.8906	10.3777	12.4093	11.6927	12.0405
ENSMUSG00000057093	Zfp607b	1.8407	0.0066		5.8546	6.0978	6.4015	8.5035	7.5892	7.6063
ENSMUSG00000015837	Sqstm1	1.8406	0.0007		13.8555	13.8628	13.9223	16.0917	15.4588	15.6498
ENSMUSG00000026447	Pik3c2b	1.8391	0.0188		6.7907	7.8241	6.5055	8.7544	9.5605	8.1711
ENSMUSG00000050953	Gja1	1.8391	0.0045		6.3076	6.414	7.454	8.6866	8.5211	8.4456
ENSMUSG00000026504	Sdccag8	1.839	0.0011		8.7374	8.9414	8.8953	10.9663	10.8677	10.2517
ENSMUSG00000039153	Runx2	1.8387	0.0134		5.1907	5.162	5.7898	7.4431	7.5408	6.3622
ENSMUSG00000104913	Gm6560	1.8372	0.0032		4.8274	5.051	5.2158	6.6351	6.9005	6.7778
ENSMUSG00000088246	NA	1.8365	0.2789		3.8241	3.7779	2.2599	4.8827	5.6913	2.7541
ENSMUSG00000021266	Wars	1.8361	0.0004		10.596	10.382	10.5357	12.5315	12.1131	12.4007
ENSMUSG00000028801	Stpg1	1.836	0.1608		2.3266	2.9133	3.252	4.8358	4.3889	2.7541
ENSMUSG00000043415	Otud1	1.8349	0.0019		7.983	8.331	8.0941	9.735	9.757	10.4601
ENSMUSG00000109801	Olfr1316	1.833	0.1647		3.9241	3.2173	2.2599	4.9723	4.314	3.2468
ENSMUSG00000035637	Grhpr	1.8321	0.0015		9.3541	10.0744	9.1691	11.2375	11.4882	11.3807
ENSMUSG00000064193	Gm4735	1.8307	0.0112		4.3407	4.3774	3.9121	5.417	5.9104	6.21
ENSMUSG00000115009	G930009F23Rik ENSMUSG00000115009	1.8304	0.0015		8.006	8.6494	8.7783	10.5832	10.173	10.2055
ENSMUSG00000102737	1700016A09Rik	1.8302	0.0277		2.8174	3.0733	2.671	3.9387	4.3889	3.7668
ENSMUSG00000097497	Gm26652	1.8292	0.0199		4.1881	4.8447	4.3068	5.4794	6.6798	6.21
ENSMUSG00000025007	Aldh18a1	1.8288	0.0004		11.9735	11.6166	11.9535	13.5714	13.7542	13.7315
ENSMUSG00000042851	Zc3h6	1.8271	0.0914		7.5227	7.79	7.0606	10.6593	9.2119	7.7045
ENSMUSG00000026304	Rab17	1.8268	0.0153		6.4486	6.5963	5.9823	8.7161	8.2818	7.2245
ENSMUSG00000000078	Klf6	1.8251	0.0046		11.9794	12.2066	11.9405	14.6774	13.3207	13.6465
ENSMUSG00000031570	Plpp5	1.8235	0.004		8.2899	8.0525	8.6452	9.7729	9.9868	10.7611
ENSMUSG00000038059	Smim3	1.8221	0.0009		9.2448	9.4695	9.7064	11.3633	10.9937	11.5646
ENSMUSG00000029992	Gfpt1	1.8207	0.0102		11.2291	11.159	10.1186	13.1265	12.9533	11.9296
ENSMUSG00000046959	Slc26a1	1.8205	0.0409		3.183	4.604	5.0537	5.806	5.7774	6.0988
ENSMUSG00000078816	Prkcg	1.8201	0.0051		4.7748	4.3148	4.4176	6.2438	6.1659	6.0094
ENSMUSG00000020326	Ccng1	1.8199	0.0039		12.564	11.8991	12.2427	14.5818	14.1951	13.4413
ENSMUSG00000117332	Gm49942	1.8188	0.0685		2.3266	2.9133	3.252	3.9387	4.46	3.4417
ENSMUSG00000029217	Tec	1.8186	0.0053		6.3798	7.3092	6.8197	8.598	9.0684	8.205
ENSMUSG00000085843	Kank4os	1.8156	0.0326		2.8174	2.9133	3.252	4.4559	3.7586	4.6204
ENSMUSG00000022074	Tnfrsf10b	1.8147	0.0042		9.4069	9.117	8.8905	11.5625	10.8855	10.3791
ENSMUSG00000027999	Pla2g12a	1.8144	0.0008		7.7644	7.8629	8.017	9.9278	9.4942	9.6569
ENSMUSG00000089706	B230216N24Rik	1.8098	0.0593		3.336	3.0733	2.9906	4.3924	5.2839	3.6134
ENSMUSG00000005883	Spo11	1.8095	0.0389		3.7167	3.2173	3.8344	4.326	5.4678	5.498
ENSMUSG00000040918	Slc19a2	1.8079	0.0022		9.5701	9.4294	9.2648	11.8103	10.9982	10.8794
ENSMUSG00000025257	Ribc1	1.8071	0.0083		5.1907	5.833	5.705	7.8674	6.9508	7.1
ENSMUSG00000000184	Ccnd2	1.8066	0.0349		3.6006	3.9527	3.5724	5.8302	5.3226	4.3559
ENSMUSG00000107352	Gm43660	1.8059	0.0325		2.5928	3.2173	3.252	4.1833	4.0629	4.6204
ENSMUSG00000089239	Gm22200	1.8051	0.0277		3.4743	3.868	4.2481	5.4486	4.8261	6.0398
ENSMUSG00000074794	Arrdc3	1.8047	0.009		10.5663	11.1366	10.6024	13.4525	12.459	11.8593
ENSMUSG00000087132	A930001C03Rik	1.8042	0.0027		6.4981	6.515	6.5548	8.2674	8.6711	7.9079
ENSMUSG00000069939	Gm12070	1.8022	0.1482		3.336	2.2879	2.2599	3.1248	4.3889	3.0214
ENSMUSG00000105199	Gm43581	1.8021	0.0084		5.3064	4.8447	5.8892	6.7661	7.1361	7.3633
ENSMUSG00000028211	Trp53inp1	1.8001	0.0148		12.2831	12.1917	12.1689	15.1325	13.8102	13.1628
ENSMUSG00000028132	Tlcd4	1.7975	0.0908		4.3407	4.6554	2.8396	5.417	5.9104	4.6204
ENSMUSG00000097772	5430416N02Rik	1.7973	0.0051		8.6956	8.6173	9.4041	10.2056	10.7142	11.2583
ENSMUSG00000103122	Gm37391	1.797	0.1244		2.3266	4.0328	2.671	3.5306	4.46	4.3559
ENSMUSG00000026131	Dst	1.7963	0.0006		12.376	12.2714	12.2908	14.4353	14.0785	13.8531
ENSMUSG00000025545	Clybl	1.7949	0.0004		8.1263	8.0904	8.2178	9.9934	9.8593	9.9651
ENSMUSG00000021998	Lcp1	1.7928	0.0186		3.7167	3.579	4.3068	5.7815	4.9793	5.4076
ENSMUSG00000039616	Mocos	1.7921	0.0346		3.0117	2.9133	3.9858	4.8358	4.46	4.6204
ENSMUSG00000030695	Aldoa	1.792	0.0023		14.6665	15.4073	14.5152	16.5258	16.8751	16.597
ENSMUSG00000063524	Eno1	1.7913	0.0018		14.1225	14.7949	13.9536	16.1099	16.2457	15.9274
ENSMUSG00000117406	Ntn3	1.7896	0.0256		3.336	3.3482	2.9906	4.8827	4.6546	4.0319
ENSMUSG00000006641	Slc5a6	1.7895	0.0021		6.9174	6.8382	7.4145	9.0831	8.5861	8.8321
ENSMUSG00000024386	Proc	1.7892	0.0429		3.9241	4.6554	4.6621	6.8512	6.0322	5.0963
ENSMUSG00000098113	Gm2445	1.7881	0.1138		3.8241	2.2879	3.1272	3.6439	4.46	4.4496
ENSMUSG00000025185	Loxl4	1.7876	0.0018		9.1343	9.4838	9.9515	11.0172	11.4241	11.5362
ENSMUSG00000020658	Efr3b	1.7875	0.0184		3.183	2.9133	3.4733	4.5167	4.46	4.5375
ENSMUSG00000019851	Perp	1.7869	0.0011		9.6689	9.4731	9.971	11.7819	11.5669	11.1526
ENSMUSG00000044636	Csrnp2	1.7861	0.0387		9.6082	9.8594	9.8441	13.0103	10.9238	10.7747
ENSMUSG00000085006	BC021767	1.7847	0.0146		3.7167	3.2173	3.4733	4.9282	5.0269	4.6204
ENSMUSG00000024049	Myom1	1.7846	0.0062		5.2689	5.3612	5.4937	7.5193	6.6497	7.0561
ENSMUSG00000097245	Gm5421	1.7836	0.046		3.0117	3.0733	2.48	3.9387	3.641	4.3559
ENSMUSG00000095280	NA	1.783	0.2171		4.1054	3.9527	5.019	5.806	4.3889	8.1007
ENSMUSG00000113423	Gm3791	1.7828	0.0436		2.8174	2.9133	2.9906	3.5306	4.314	4.6204
ENSMUSG00000023456	Tpi1	1.7808	0.0008		13.7037	14.2208	13.6867	15.6877	15.5365	15.7574
ENSMUSG00000105789	Gm42997	1.7798	0.0759		2.8174	2.2879	3.252	3.749	3.5129	4.2558
ENSMUSG00000032648	Pygm	1.7784	0.0114		5.2689	5.5634	5.3614	7.7709	6.7805	6.6652
ENSMUSG00000032122	Slc37a2	1.7782	0.0168		3.183	3.0733	3.1272	4.326	4.6546	4.2558
ENSMUSG00000042406	Atf4	1.7762	0.002		12.7506	12.1446	12.9703	14.4826	14.133	14.6032
ENSMUSG00000087445	Gm14286	1.7713	0.0213		4.1054	4.5506	4.1229	6.314	5.9847	5.0963
ENSMUSG00000086993	Rsf1os2	1.77	0.0218		4.0176	3.4682	3.9121	5.3848	4.7712	5.7396
ENSMUSG00000112449	Srp54b	1.7698	0.0766		2.8174	2.9133	3.5724	3.6439	4.46	5.2077
ENSMUSG00000050106	Tmc8	1.7689	0.0366		4.4113	4.4375	3.7522	6.4911	5.6309	4.9755
ENSMUSG00000041301	Cftr	1.7683	0.099		4.3407	3.2173	5.5434	6.2074	5.1178	6.4327
ENSMUSG00000056004	Elapor2	1.7673	0.0165		3.183	3.579	3.1272	4.575	4.7712	4.5375
ENSMUSG00000040734	Ppp1r13l	1.7656	0.0056		8.5428	8.7623	8.1065	10.6618	10.4206	9.5526
ENSMUSG00000041836	Ptpre	1.7654	0.0004		8.2129	8.2496	8.3529	10.0485	10.0687	9.9964
ENSMUSG00000104378	Gm37510	1.7625	0.0664		3.336	2.9133	2.671	4.1063	4.8261	3.4417
ENSMUSG00000024186	Rgs11	1.7623	0.0602		4.3407	6.0016	3.8344	6.2438	6.7805	5.8119
ENSMUSG00000031644	Nek1	1.7623	0.0018		9.5291	9.8261	9.2215	11.6294	11.3598	10.8784
ENSMUSG00000025823	Pdia4	1.7605	0.0038		12.3503	12.0881	12.6391	14.7953	13.7152	13.8879
ENSMUSG00000002083	Bbc3	1.7598	0.0228		8.2805	8.8085	8.786	11.4574	10.0062	9.6667
ENSMUSG00000085886	D030047H15Rik	1.7594	0.0307		3.183	3.2173	4.056	4.575	4.8261	5.3111
ENSMUSG00000037818	Abhd18	1.7565	0.0019		6.7367	7.0646	6.3743	8.4499	8.4442	8.4569
ENSMUSG00000053706	B430305J03Rik	1.7559	0.0258		3.9241	3.868	3.9858	6.151	4.9793	5.0963
ENSMUSG00000039377	Hlx	1.7555	0.0041		5.4135	5.4219	6.0353	7.4034	7.1252	7.4565
ENSMUSG00000032294	Pkm	1.755	0.0007		14.656	15.1055	14.8556	16.5044	16.7724	16.6318
ENSMUSG00000063506	Arhgap22	1.7531	0.018		9.1755	9.1329	9.3228	11.9679	10.827	10.083
ENSMUSG00000097354	2310001H17Rik	1.7523	0.0164		7.0561	7.0741	5.9083	8.9736	8.1642	7.9079
ENSMUSG00000037185	Krt80	1.7522	0.0023		9.3631	9.6908	9.2977	11.6855	11.1968	10.7335
ENSMUSG00000032020	Ubash3b	1.7506	0.0101		5.576	6.4726	7.0606	8.043	8.3629	7.8997
ENSMUSG00000028982	Slc25a33	1.7482	0.0023		7.152	7.218	6.9635	8.5479	9.2093	8.7699
ENSMUSG00000017718	Afmid	1.7469	0.003		5.6362	6.0016	5.9083	7.7895	7.5408	7.2637
ENSMUSG00000111058	Gm36033	1.746	0.006		4.5429	4.604	4.8317	6.4449	5.9847	6.3861
ENSMUSG00000045102	Poln	1.7457	0.0193		3.336	4.0328	3.6651	4.7873	5.4329	5.153
ENSMUSG00000096960	A230028O05Rik	1.7457	0.0526		2.8174	3.3482	2.671	4.6311	3.9684	3.6134
ENSMUSG00000021282	Eif5	1.7449	0.0004		12.8119	12.7756	12.8173	14.4724	14.7522	14.4467
ENSMUSG00000021185	Dglucy	1.7443	0.004		9.1831	8.4741	8.9699	10.8035	10.9756	10.046
ENSMUSG00000107136	Gm42466	1.7421	0.1067		2.5928	3.2173	2.48	3.1248	3.8673	4.6204
ENSMUSG00000103808	Gm37060	1.7404	0.1121		2.5928	3.579	3.8344	3.749	5.3226	4.9755
ENSMUSG00000026070	Il18r1	1.7394	0.0166		5.8798	6.7344	6.8096	7.8199	7.9083	9.0001
ENSMUSG00000085669	Gm14817	1.7389	0.035		2.8174	3.0733	2.9906	4.2564	4.5279	3.6134
ENSMUSG00000105350	4930537H20Rik	1.7379	0.1086		3.0117	2.2879	3.252	3.4076	3.7586	4.6204
ENSMUSG00000070806	Zmynd12	1.7356	0.0249		3.336	4.1086	3.6651	4.685	5.4678	5.3111
ENSMUSG00000097749	Gm16938	1.7343	0.0202		3.4743	3.4682	4.1868	5.318	4.8261	5.3111
ENSMUSG00000097183	Gm17501	1.7334	0.107		4.2664	3.4682	5.683	5.318	5.8848	7.0107
ENSMUSG00000036432	Siah2	1.733	0.0029		8.5623	8.181	8.7834	10.5417	9.7798	10.4202
ENSMUSG00000022479	Vdr	1.7329	0.0759		4.1054	3.7779	3.1272	5.9888	4.7712	4.2558
ENSMUSG00000097683	Gm26644	1.7327	0.0601		2.8174	4.1806	3.5724	5.417	4.3889	4.7731
ENSMUSG00000088892	NA	1.7293	0.1101		2.3266	2.9133	2.671	2.9594	3.641	4.4496
ENSMUSG00000037940	Inpp4b	1.7275	0.0695		3.0117	3.2173	2.48	3.9387	4.5279	3.4417
ENSMUSG00000062232	Rapgef2	1.7273	0.0028		10.382	10.1913	10.4881	12.7135	11.7382	11.8264
ENSMUSG00000053641	Dennd4a	1.7262	0.0057		9.2664	8.7236	7.9904	10.6719	10.3225	10.072
ENSMUSG00000039782	Cpeb2	1.721	0.0492		8.0342	8.1678	6.9635	10.4915	9.1022	8.5177
ENSMUSG00000107286	Gm43788	1.7209	0.1081		3.183	4.3774	4.5692	4.4559	6.1445	6.183
ENSMUSG00000054720	Lrrc8c	1.7205	0.0266		8.9686	8.8394	7.4669	10.3835	10.5977	9.3027
ENSMUSG00000021453	Gadd45g	1.7175	0.0029		7.1826	7.9887	8.1065	9.4974	9.6771	9.2805
ENSMUSG00000029484	Anxa3	1.7131	0.0029		12.1237	11.7454	12.7433	13.7715	13.848	14.1492
ENSMUSG00000027901	Dennd2d	1.7126	0.0744		4.2664	4.5506	3.7522	6.0923	6.3645	4.4496
ENSMUSG00000029816	Gpnmb	1.7118	0.2568		4.8274	3.579	7.9356	7.379	6.0086	7.7965
ENSMUSG00000020758	Itgb4	1.7104	0.153		10.3407	10.9475	8.3667	12.6212	12.2079	9.937
ENSMUSG00000105006	Gm9484	1.7098	0.0242		3.336	3.579	3.4733	5.1362	4.9793	4.2558
ENSMUSG00000045467	Ttll13	1.7095	0.0223		3.8241	4.7051	3.9858	6.151	5.4329	5.3601
ENSMUSG00000030609	Aen	1.7076	0.0046		9.3541	8.8113	9.5676	11.5228	10.6462	10.6945
ENSMUSG00000087685	1700122E12Rik	1.7057	0.0152		3.4743	3.2173	3.5724	4.7873	4.8261	4.6204
ENSMUSG00000097027	Gm26559	1.7025	0.0059		4.5429	4.6554	4.8712	6.3972	6.3458	6.0094
ENSMUSG00000036036	Zfp57	1.7023	0.0011		7.9945	8.3071	8.6222	9.95	9.9393	10.192
ENSMUSG00000026615	Eprs	1.6983	0.0011		12.5099	12.1188	12.7054	14.1405	13.9645	14.3477
ENSMUSG00000101037	Gm28424	1.6955	0.0068		4.5429	4.4951	4.947	6.0311	6.2883	6.3861
ENSMUSG00000107115	Gm43052	1.6953	0.0242		3.183	2.9133	3.3669	4.1833	4.5279	4.4496
ENSMUSG00000097148	Gm3839	1.6947	0.0692		2.5928	3.6819	2.9906	3.749	4.46	4.6204
ENSMUSG00000025608	Podxl	1.6918	0.0053		9.845	10.7133	10.4066	12.351	12.3035	11.4347
ENSMUSG00000110393	Gm36445	1.6914	0.0123		5.9287	5.642	5.2758	7.7646	7.1576	6.6652
ENSMUSG00000118219	Gm29695	1.6914	0.1095		2.3266	2.9133	2.8396	4.5167	3.2167	3.2468
ENSMUSG00000118550	Gm52965	1.6896	0.1611		2.8174	3.0733	2.48	4.8358	3.8673	2.7541
ENSMUSG00000108053	Gm43890	1.6894	0.0067		5.9992	5.4801	6.0526	7.4817	7.1142	7.8913
ENSMUSG00000075229	Ccdc58	1.6888	0.0023		9.505	9.6737	10.1501	11.6714	11.0496	11.713
ENSMUSG00000044937	Ttc41	1.6879	0.05		5.8546	5.6673	5.6606	8.4884	6.5224	6.9479
ENSMUSG00000023883	Phf10	1.6876	0.0008		10.8952	10.7995	10.8686	12.2115	12.6339	12.7978
ENSMUSG00000008318	Relt	1.6853	0.0109		5.5132	5.5084	6.5788	7.826	7.2708	7.4222
ENSMUSG00000104156	Gm38102	1.6852	0.0258		4.1881	3.579	4.056	5.248	4.9793	5.9783
ENSMUSG00000002250	Ppard	1.6842	0.0047		8.623	8.8751	8.4407	10.775	10.471	9.698
ENSMUSG00000056735	A930024E05Rik	1.6842	0.0042		5.576	6.2728	6.304	7.826	7.5408	7.742
ENSMUSG00000009654	Oit3	1.683	0.071		5.694	4.0328	6.23	7.4969	6.5057	6.6054
ENSMUSG00000027955	Gask1b	1.6822	0.2763		10.3632	7.2434	11.3192	11.773	9.6083	12.6201
ENSMUSG00000044786	Zfp36	1.6796	0.0044		8.198	7.8409	7.6819	9.8953	9.7535	9.004
ENSMUSG00000065422	Mir221	1.6794	0.0527		3.336	4.0328	4.7494	4.9282	5.5997	6.0696
ENSMUSG00000027808	Serp1	1.6783	0.0011		12.1052	11.9786	12.3492	13.8444	13.5243	14.1196
ENSMUSG00000109719	Gm45266	1.6783	0.0639		3.0117	3.7779	3.9121	4.1833	5.4678	5.2077
ENSMUSG00000030353	Tead4	1.6757	0.0058		8.7201	8.2949	8.4731	10.691	10.2352	9.5233
ENSMUSG00000029752	Asns	1.6749	0.0024		11.9877	11.1546	11.948	13.2946	13.3023	13.5427
ENSMUSG00000047443	Erfe	1.6742	0.0221		5.7495	6.2562	5.9458	6.9203	8.386	7.5858
ENSMUSG00000037982	Gm9725	1.6724	0.0432		3.0117	3.868	2.9906	4.4559	4.2351	4.9112
ENSMUSG00000097673	Gm26608	1.6714	0.0603		3.9241	2.9133	3.4733	5.3518	4.2351	4.4496
ENSMUSG00000057335	Cep170	1.6711	0.0007		11.5056	11.159	11.3143	13.2508	12.9302	12.846
ENSMUSG00000015980	Lrrc27	1.6698	0.0135		7.3891	6.9352	7.1754	9.5049	8.7081	8.115
ENSMUSG00000054520	Sh3bp2	1.6679	0.0076		7.0671	6.6224	8.0126	8.8754	8.8801	8.9688
ENSMUSG00000020423	Btg2	1.6654	0.0081		9.9377	10.0602	10.0907	12.5158	11.0682	11.5342
ENSMUSG00000031342	Gpm6b	1.6586	0.0831		2.8174	3.3482	3.3669	4.7371	4.93	3.4417
ENSMUSG00000033618	Map3k13	1.6557	0.0241		6.0219	6.4726	5.4682	8.2585	7.4736	6.8989
ENSMUSG00000036019	Tmtc2	1.6557	0.0105		8.8012	8.1182	9.3157	10.9879	10.1122	10.1029
ENSMUSG00000104342	Gm36401	1.6544	0.0051		5.722	5.2978	5.9272	7.4034	7.0113	7.3143
ENSMUSG00000112637	Gm48225	1.6536	0.0468		3.8241	3.7779	2.9906	4.326	5.2032	4.9112
ENSMUSG00000020183	Cpm	1.6526	0.0961		6.764	7.9634	5.5188	8.7449	8.8963	7.2245
ENSMUSG00000055725	Paqr3	1.6521	0.001		7.2896	7.4175	7.5051	9.1943	8.9621	8.9807
ENSMUSG00000068587	Mgam	1.6516	0.0911		3.183	2.9133	3.1272	4.8827	4.5279	3.2468
ENSMUSG00000029228	Lnx1	1.6514	0.0861		2.8174	4.1086	3.9858	5.1745	5.4329	4.1482
ENSMUSG00000029446	Psph	1.6483	0.0045		8.623	8.303	9.1064	9.9403	10.3356	10.7623
ENSMUSG00000024909	Efemp2	1.6482	0.0626		3.0117	3.4682	2.9906	4.6311	3.641	4.8438
ENSMUSG00000029699	Ssc4d	1.6471	0.0058		6.5142	6.399	6.4015	7.6741	8.0007	8.5759
ENSMUSG00000027408	Cpxm1	1.644	0.0859		3.336	3.0733	2.671	4.9282	3.7586	3.6134
ENSMUSG00000004872	Pax3	1.6421	0.0159		4.1054	3.6819	4.056	5.5683	5.4329	4.9755
ENSMUSG00000107355	AI839979	1.6415	0.0133		4.4113	5.3918	4.947	6.7021	6.5057	6.0988
ENSMUSG00000086547	Gm11755	1.64	0.1327		2.5928	3.3482	2.671	4.8827	3.2167	3.6134
ENSMUSG00000079242	C730034F03Rik	1.6375	0.0079		4.4786	4.5506	4.4699	5.9672	5.7774	6.2365
ENSMUSG00000030587	2200002D01Rik	1.6361	0.0128		9.3247	9.4713	10.5555	10.9416	11.429	11.9417
ENSMUSG00000106547	B230303O12Rik	1.634	0.0511		3.7167	4.4951	3.252	5.3848	5.4329	4.5375
ENSMUSG00000055945	Prr18	1.6311	0.022		3.0117	3.3482	3.3669	4.3924	4.5279	4.4496
ENSMUSG00000096751	Gm28373	1.6308	0.0385		4.7202	4.2493	3.7522	5.1362	6.2883	5.5412
ENSMUSG00000021747	Cfap20dc	1.6284	0.1494		6.3441	6.0978	4.4176	7.6128	7.9888	5.5831
ENSMUSG00000022364	Tbc1d31	1.6279	0.0023		9.3063	8.9999	8.7119	10.792	10.8586	10.2138
ENSMUSG00000108486	Gm44836	1.6273	0.0097		4.6045	4.1086	4.3068	5.652	5.8321	5.8808
ENSMUSG00000042734	Ttc9	1.6266	0.0088		7.2612	7.5043	7.4925	9.3549	9.3727	8.2961
ENSMUSG00000097015	Gm26705	1.6266	0.1094		2.5928	2.9133	2.8396	4.7371	3.2167	3.4417
ENSMUSG00000010755	Cars	1.6251	0.0014		11.2754	10.7359	11.193	12.7367	12.9468	12.4286
ENSMUSG00000097693	4930471M09Rik	1.6246	0.0412		3.4743	3.3482	4.1868	5.3848	4.46	5.153
ENSMUSG00000020439	Smtn	1.6239	0.0005		12.268	12.2412	12.4403	13.9171	13.8792	14.0503
ENSMUSG00000030257	Srgap3	1.6238	0.048		9.0511	8.856	7.3107	10.8255	9.679	9.4114
ENSMUSG00000002107	Celf2	1.6236	0.0073		9.1931	9.6132	8.4986	10.9886	10.9199	10.2288
ENSMUSG00000086806	Gm13054	1.6215	0.1241		3.183	2.9133	2.48	4.2564	3.0422	4.3559
ENSMUSG00000020593	Lpin1	1.6213	0.0316		9.4156	9.3319	9.6733	12.1116	11.1343	10.0385
ENSMUSG00000030095	Tmem43	1.6212	0.0018		11.1788	10.8306	11.5066	13.1057	12.7116	12.5957
ENSMUSG00000044320	1700001O22Rik	1.6178	0.1293		2.5928	2.5278	3.5724	4.6311	3.7586	3.2468
ENSMUSG00000102258	Gm38257	1.6169	0.0199		5.1907	5.6673	4.5692	6.2438	7.0348	6.6846
ENSMUSG00000104591	Gm43145	1.6169	0.207		2.5928	2.7334	2.48	2.558	4.5926	3.7668
ENSMUSG00000036091	Hyal3	1.6159	0.2743		3.6006	3.0733	3.252	6.5792	3.7586	3.2468
ENSMUSG00000097360	9430065F17Rik	1.6151	0.0278		4.1881	4.3148	4.6621	5.2117	6.3077	6.0988
ENSMUSG00000117123	Gm49890	1.6146	0.0052		7.7977	7.9786	8.0258	9.1031	9.4964	10.1137
ENSMUSG00000100747	1700084E18Rik	1.6142	0.015		3.7167	3.9527	4.1868	5.097	5.5353	5.4076
ENSMUSG00000026930	Gpsm1	1.6135	0.0057		8.8966	9.304	9.6564	11.4467	10.8496	10.426
ENSMUSG00000097785	B230217O12Rik	1.6112	0.0265		3.7167	4.2493	3.7522	4.8827	5.2441	5.7762
ENSMUSG00000095186	Gm10718	1.61	0.1757		3.0117	3.0733	2.8396	3.749	3.2167	5.6239
ENSMUSG00000038037	Socs1	1.6099	0.0143		4.2664	3.7779	4.1229	5.3518	5.6913	5.2603
ENSMUSG00000074818	Pdzd7	1.6096	0.1942		3.183	5.0121	3.5724	6.1888	5.6309	3.7668
ENSMUSG00000110038	Gm45570	1.6093	0.0622		2.8174	3.3482	2.8396	4.685	3.7586	3.7668
ENSMUSG00000111539	Gm48372	1.6081	0.1254		3.0117	2.2879	3.1272	3.5306	4.3889	3.2468
ENSMUSG00000070644	Etnk2	1.6039	0.0397		3.6006	4.7532	3.6651	5.097	5.7774	5.2077
ENSMUSG00000026994	Galnt3	1.6035	0.0964		8.1677	7.6762	6.4149	9.6426	9.49	7.5858
ENSMUSG00000085995	Gm2788	1.6031	0.0347		3.336	3.3482	3.8344	5.1745	4.314	4.8438
ENSMUSG00000020799	Tekt1	1.6025	0.1652		3.0117	3.9527	2.671	5.2117	4.3889	3.2468
ENSMUSG00000031824	6430548M08Rik	1.5997	0.0211		6.8681	7.5043	6.6024	9.2779	8.3536	7.9566
ENSMUSG00000086813	Gm13657	1.5994	0.0575		4.6635	5.0121	3.4733	5.8773	6.0782	5.2077
ENSMUSG00000031453	Rasa3	1.5991	0.0066		8.4154	8.4524	8.6593	10.4306	10.458	9.4026
ENSMUSG00000093424	6330562C20Rik	1.5984	0.032		4.7202	5.1259	4.7912	6.6757	5.5679	6.9154
ENSMUSG00000045730	Adrb2	1.5976	0.1225		2.5928	3.2173	2.9906	4.326	4.5926	3.0214
ENSMUSG00000022508	Bcl6	1.5958	0.0106		8.6598	8.8477	8.1147	10.639	10.2678	9.4201
ENSMUSG00000084797	Gm14321	1.5948	0.0102		5.3064	5.6673	5.1531	7.3375	6.5874	6.7037
ENSMUSG00000025403	Shmt2	1.5944	0.0021		12.1481	11.6601	12.1859	13.4759	13.3539	13.9668
ENSMUSG00000031700	Gpt2	1.5941	0.0007		9.535	9.6564	9.8784	11.217	11.4813	11.1819
ENSMUSG00000045211	Nudt18	1.5931	0.0671		7.1102	7.8629	6.0865	9.3019	8.7081	7.5333
ENSMUSG00000093536	Smim17	1.5926	0.1402		3.0117	2.2879	2.8396	2.9594	3.7586	4.2558
ENSMUSG00000037999	Arap2	1.5919	0.0041		9.1704	9.0845	8.9424	11.2498	10.3237	10.3821
ENSMUSG00000022639	Dubr	1.5918	0.0109		9.3497	8.9284	8.5722	11.1887	9.9393	10.4559
ENSMUSG00000109394	A230057D06Rik	1.5908	0.0997		2.8174	3.4682	2.671	4.5167	4.2351	3.2468
ENSMUSG00000087624	9230111E07Rik	1.5904	0.0092		4.6045	4.3774	4.3632	5.806	5.7493	6.0988
ENSMUSG00000050721	Plekho2	1.5888	0.0041		7.4658	7.5043	8.3941	9.5087	9.3635	9.2869
ENSMUSG00000007589	Tinf2	1.5883	0.002		9.4868	9.1375	9.7427	10.7766	11.3569	11.0225
ENSMUSG00000020181	Nav3	1.588	0.1195		3.336	2.7334	3.6651	5.318	4.1515	3.6134
ENSMUSG00000089959	Gm16268	1.5864	0.0988		2.3266	3.0733	3.1272	3.847	3.3724	4.2558
ENSMUSG00000025140	Pycr1	1.5824	0.0045		7.4322	7.5113	7.5422	8.9951	8.7044	9.5762
ENSMUSG00000097150	Gm26513	1.5797	0.0306		3.6006	4.1086	4.2481	5.8773	5.1178	4.9755
ENSMUSG00000037400	Atp11b	1.5794	0.0036		10.7367	10.4887	10.0013	12.275	12.16	11.5515
ENSMUSG00000097675	1700101I11Rik	1.5792	0.0995		3.336	2.7334	2.9906	4.9282	3.5129	3.7668
ENSMUSG00000001119	Col6a1	1.5789	0.0509		4.6635	5.4219	6.3183	7.2327	7.465	6.21
ENSMUSG00000026343	Gpr39	1.5789	0.0041		9.3808	8.9362	9.0168	11.1968	10.2566	10.6033
ENSMUSG00000043789	Vwce	1.5774	0.0503		3.336	3.579	3.8344	5.4486	4.879	4.1482
ENSMUSG00000026548	Slamf9	1.5771	0.0126		5.065	4.7051	5.3889	6.6757	6.1445	6.8135
ENSMUSG00000023905	Tnfrsf12a	1.576	0.0084		11.4049	11.2276	12.4069	13.4324	12.9172	13.4354
ENSMUSG00000035834	Polr3g	1.5753	0.0015		8.1211	7.6574	8.179	9.4631	9.5442	9.6812
ENSMUSG00000059060	Rad51b	1.5749	0.0051		6.1306	6.0016	6.6141	7.8674	7.9888	7.4899
ENSMUSG00000028539	Artn	1.5724	0.0229		3.8241	4.0328	3.6651	5.4486	5.2441	4.6988
ENSMUSG00000020080	Hkdc1	1.5698	0.1438		6.3441	6.6224	5.683	9.1638	7.5813	6.21
ENSMUSG00000112368	Gm49376	1.5698	0.0127		4.8274	4.7532	4.1868	6.17	5.805	6.0094
ENSMUSG00000085085	1700086P04Rik	1.5697	0.0543		3.0117	3.868	3.252	5.0566	4.1515	4.4496
ENSMUSG00000041245	Wnk3	1.5678	0.012		4.1881	4.0328	4.3632	5.3848	5.6614	5.7021
ENSMUSG00000001870	Ltbp1	1.5676	0.0143		10.5061	10.4336	11.8338	12.7015	12.5783	12.2334
ENSMUSG00000050035	Fhl4	1.5666	0.0397		4.4786	4.9308	5.5434	7.0799	5.7774	6.5217
ENSMUSG00000020484	Xbp1	1.5661	0.0008		10.7212	10.9839	10.7729	12.2689	12.2804	12.6475
ENSMUSG00000022296	Baalc	1.5658	0.0301		4.7202	4.4375	5.5188	6.8629	5.8848	6.2881
ENSMUSG00000112317	Gm47580	1.5652	0.0276		4.7748	4.3774	3.6651	5.5683	5.8321	5.4076
ENSMUSG00000115685	D730044K07Rik	1.5646	0.0685		3.6006	3.3482	5.019	5.4794	5.0269	5.4076
ENSMUSG00000087443	Ppp1r18os	1.5645	0.0495		3.183	2.7334	3.4733	4.1063	4.0629	4.5375
ENSMUSG00000025355	Mmp19	1.5644	0.0681		3.336	3.2173	3.252	5.248	3.9684	4.0319
ENSMUSG00000017314	Mpp2	1.5639	0.0047		9.3452	9.4331	8.6734	10.8858	10.9733	10.2501
ENSMUSG00000032177	Pde4a	1.5635	0.1613		3.336	4.7532	3.252	5.5097	5.6913	3.7668
ENSMUSG00000030683	Sez6l2	1.5624	0.0492		4.2664	4.1806	3.252	5.5967	4.7712	5.0963
ENSMUSG00000052566	Hook2	1.5623	0.0013		8.9271	9.4386	8.9072	10.5716	10.8203	10.5802
ENSMUSG00000108291	Gm44292	1.5622	0.0953		4.0176	4.8884	4.5204	6.6074	6.2883	4.6204
ENSMUSG00000028435	Aqp3	1.5604	0.2839		3.0117	5.3918	2.8396	5.7565	5.2839	3.4417
ENSMUSG00000097313	Gm26569	1.5584	0.0194		4.2664	4.604	4.4699	6.3479	5.4678	5.7021
ENSMUSG00000047671	Dynlt4	1.5566	0.0184		3.9241	3.7779	3.8344	5.4486	4.879	5.0963
ENSMUSG00000055723	Rras2	1.5566	0.0005		11.953	11.8958	12.0445	13.3987	13.5635	13.6256
ENSMUSG00000097304	Rpl31-ps15	1.5552	0.0726		4.6635	4.3774	5.5188	7.2052	5.5019	6.1555
ENSMUSG00000053007	Creb5	1.5541	0.0261		9.7202	9.7992	9.173	12.1152	10.8092	10.4144
ENSMUSG00000075014	Gm10800	1.5516	0.1866		6.5615	6.3529	7.36	7.8848	7.0464	10.2695
ENSMUSG00000024533	Spire1	1.5511	0.0013		9.3109	8.7971	8.9493	10.7913	10.4372	10.4671
ENSMUSG00000027340	Slc23a2	1.5508	0.0029		9.5682	9.7273	9.3666	11.5544	11.0809	10.6813
ENSMUSG00000104493	Gm19552	1.55	0.0298		4.1054	3.868	3.3669	4.8827	5.3603	4.8438
ENSMUSG00000026656	Fcgr2b	1.5485	0.2491		2.5928	3.9527	2.2599	3.1248	4.7141	3.4417
ENSMUSG00000092300	Cdk3	1.5451	0.0123		4.7202	5.3298	4.8317	6.2793	6.7525	6.1555
ENSMUSG00000042292	Mrtfa	1.544	0.0052		10.7028	10.6865	10.144	12.4911	12.2021	11.5031
ENSMUSG00000116842	Gm49588	1.5432	0.1156		3.6006	3.9527	3.5724	6.17	4.2351	4.4496
ENSMUSG00000018143	Mafk	1.5429	0.0023		9.4004	9.4294	9.6705	11.4975	10.7475	10.9055
ENSMUSG00000107881	Gm44250	1.5426	0.0569		7.2612	6.1879	6.0697	8.8899	7.8028	7.1286
ENSMUSG00000117429	A430019L02Rik	1.5419	0.0551		3.6006	4.1806	3.4733	4.3924	5.5679	5.153
ENSMUSG00000026014	Raph1	1.5413	0.0292		9.8226	9.5138	8.7912	11.5439	11.1922	9.9591
ENSMUSG00000006310	Zbtb32	1.5411	0.1174		4.1054	4.972	3.6651	6.4604	5.6614	4.4496
ENSMUSG00000027438	Napb	1.5404	0.0009		8.0117	7.8575	8.0688	9.5691	9.4425	9.542
ENSMUSG00000049878	Rlf	1.5402	0.001		10.3951	10.6441	10.164	12.1091	11.9859	11.7543
ENSMUSG00000022565	Plec	1.5396	0.0032		13.8359	14.1991	13.8564	15.7988	15.7574	15.0044
ENSMUSG00000085054	Gm15834	1.5395	0.0284		4.0176	4.5506	4.9096	5.4486	5.9847	6.338
ENSMUSG00000003873	Bax	1.5388	0.0019		9.4745	9.312	9.8784	11.4081	10.9246	10.975
ENSMUSG00000087593	Gm16174	1.5386	0.011		5.2689	5.1971	5.8892	6.5934	7.1142	7.1286
ENSMUSG00000102759	Gm10463	1.5377	0.0837		3.6006	3.0733	3.5724	5.318	4.5926	3.7668
ENSMUSG00000038146	Notch3	1.5374	0.3889		4.3407	6.2728	3.5724	7.8439	6.539	3.6134
ENSMUSG00000118557	Gm53043	1.5356	0.0446		3.183	3.6819	3.7522	4.2564	5.0731	5.0372
ENSMUSG00000029993	Nfu1	1.5353	0.0022		10.0063	9.6721	10.2895	11.2227	11.5924	11.7838
ENSMUSG00000105259	Gm42874	1.5352	0.0782		3.183	2.7334	2.8396	3.4076	4.46	3.9054
ENSMUSG00000023088	Abcc1	1.5351	0.0011		12.2819	12.2034	11.8853	13.7835	13.8097	13.4228
ENSMUSG00000082082	Gm13230	1.5341	0.0123		5.6362	4.972	5.5188	6.6351	6.6497	7.2637
ENSMUSG00000059412	Fxyd2	1.5331	0.1078		4.1054	3.6819	2.671	4.7371	4.8261	4.0319
ENSMUSG00000001131	Timp1	1.5323	0.0042		8.1105	7.9376	8.9001	9.7493	9.8707	9.9828
ENSMUSG00000091514	Gm17484	1.5316	0.021		4.1881	4.1806	4.3068	6.0311	5.4678	5.153
ENSMUSG00000026663	Atf6	1.5312	0.0029		10.8323	10.502	10.6061	12.6919	11.8085	12.0629
ENSMUSG00000048482	Bdnf	1.5312	0.0059		7.3266	7.447	7.9168	9.0957	8.719	9.534
ENSMUSG00000049811	Fam161a	1.53	0.1491		4.7202	4.4951	3.6651	6.151	6.3829	4.1482
ENSMUSG00000080626	Mir1192	1.5284	0.049		3.336	3.0733	2.8396	4.1063	4.46	3.7668
ENSMUSG00000021171	Esyt2	1.5253	0.0047		11.5537	11.7263	11.3605	13.2564	13.5282	12.4777
ENSMUSG00000021585	Cast	1.5252	0.0027		11.4475	11.2618	11.1798	13.2557	12.8891	12.3639
ENSMUSG00000114515	Aldoa	1.5246	0.0046		5.9526	6.1879	6.4149	7.6335	7.4992	7.9486
ENSMUSG00000024843	Chka	1.5236	0.0027		12.7299	12.7337	12.2061	14.409	14.1317	13.7466
ENSMUSG00000110586	4930578M07Rik	1.5223	0.0731		2.5928	3.3482	2.8396	3.749	4.314	3.6134
ENSMUSG00000044813	Shb	1.5222	0.001		10.9181	11.1281	10.6912	12.6709	12.3141	12.3492
ENSMUSG00000022586	Ly6i	1.5216	0.0862		2.5928	3.4682	2.9906	4.2564	4.314	3.4417
ENSMUSG00000022306	Zfpm2	1.5206	0.0319		6.817	7.9428	6.879	8.5587	9.4469	8.0934
ENSMUSG00000034591	Slc41a2	1.5204	0.0118		8.0117	7.2767	7.3178	9.5993	8.6292	8.8146
ENSMUSG00000035929	H2-Q4	1.5199	0.0297		6.0443	5.7643	6.7151	8.3195	7.0231	7.6164
ENSMUSG00000063406	Tmed5	1.518	0.0008		10.6026	10.2065	10.4625	12.1149	11.8973	11.8373
ENSMUSG00000005514	Por	1.5171	0.0055		11.0233	10.9989	10.6322	12.9228	12.5089	11.816
ENSMUSG00000030699	Tbx6	1.5162	0.0497		3.336	4.3774	3.6651	5.5097	4.7141	4.8438
ENSMUSG00000087574	C030037D09Rik	1.5158	0.0054		6.192	6.2053	6.7043	8.1331	7.6284	7.7965
ENSMUSG00000074141	Il4i1	1.5146	0.0203		6.1513	5.9407	6.0526	7.7709	7.9767	6.7037
ENSMUSG00000078607	1810010H24Rik	1.5146	0.0451		3.4743	4.0328	3.3669	4.5167	5.3603	4.6204
ENSMUSG00000030738	Eif3c	1.5138	0.0007		13.0297	12.9689	12.844	14.4528	14.6054	14.3607
ENSMUSG00000033307	Mif	1.5134	0.0027		12.0998	12.4912	12.7241	13.9426	13.6605	14.2682
ENSMUSG00000078967	Gapdh-ps16	1.5133	0.0058		6.5142	5.877	6.1197	7.4273	7.6665	7.8576
ENSMUSG00000029201	Ugdh	1.5131	0.0036		12.2233	11.6774	11.5031	13.5372	13.5072	12.9455
ENSMUSG00000046731	Kctd11	1.5111	0.0136		8.2852	8.4954	8.5572	9.2174	10.2174	10.514
ENSMUSG00000017418	Arl5b	1.5103	0.005		10.054	10.1638	10.0505	12.2181	11.5083	11.1021
ENSMUSG00000078776	9530053A07Rik	1.5073	0.0525		6.8806	7.7372	7.325	9.8561	8.3061	8.1642
ENSMUSG00000105457	Gm43200	1.5066	0.1432		4.2664	3.0733	3.6651	3.847	5.3603	5.5412
ENSMUSG00000042650	Alkbh5	1.5064	0.0132		12.5077	13.0408	11.8979	14.458	14.1164	13.4442
ENSMUSG00000029009	Mthfr	1.5056	0.0008		8.9028	8.867	8.8712	10.3639	10.2453	10.5672
ENSMUSG00000060594	Layn	1.5042	0.0229		6.6949	6.1525	6.8692	7.5487	8.7619	7.8576
ENSMUSG00000105801	C430019N01Rik	1.5042	0.1144		2.8174	3.3482	3.9121	3.749	5.0731	4.7731
ENSMUSG00000030104	Edem1	1.5034	0.0018		11.3064	10.9775	11.1935	13.0665	12.436	12.5198
ENSMUSG00000109032	Gm7972	1.5031	0.0597		3.183	3.6819	2.9906	4.8827	4.0629	4.1482
ENSMUSG00000063531	Sema3e	1.5029	0.01		11.1674	10.0554	11.0261	12.6684	12.1465	11.9736
ENSMUSG00000105326	6030400A10Rik	1.5028	0.1414		3.8241	4.0328	2.48	4.575	4.3889	4.2558
ENSMUSG00000023805	Synj2	1.5026	0.0215		7.3447	7.235	6.6599	8.7096	9.0826	7.7604
ENSMUSG00000118107	Gm34455	1.5013	0.0795		3.0117	2.7334	2.9906	4.5167	3.641	3.4417
ENSMUSG00000028158	Mttp	1.5004	0.0173		7.2322	7.3566	7.6984	9.6081	8.3301	8.8058
ENSMUSG00000031734	Irx3	1.4989	0.0801		3.183	4.604	3.9858	5.248	5.6614	4.5375
ENSMUSG00000020248	Nfyb	1.4987	0.0035		10.1857	10.0721	10.3022	12.2286	11.5684	11.2918
ENSMUSG00000054871	Tmem158	1.4983	0.0182		4.8782	5.5361	4.5692	6.314	6.6497	6.1555
ENSMUSG00000103114	Gm32200	1.498	0.2313		2.8174	2.9133	2.671	5.2117	3.0422	3.0214
ENSMUSG00000029552	Tes	1.4976	0.0008		11.2878	11.6097	11.6819	12.9216	13.052	13.1205
ENSMUSG00000027353	Mcm8	1.4974	0.001		8.519	8.6494	8.6251	10.1952	10.2199	9.8666
ENSMUSG00000105707	Gm43753	1.497	0.0474		3.4743	3.3482	2.8396	4.3924	4.0629	4.3559
ENSMUSG00000029762	Akr1b8	1.4967	0.0026		7.8995	7.755	8.1986	9.2691	9.757	9.3214
ENSMUSG00000104735	C130075A20Rik	1.4959	0.0686		4.3407	3.2173	3.6651	4.4559	4.93	5.498
ENSMUSG00000096950	Gm9530	1.4942	0.0649		3.8241	3.0733	4.3068	5.318	4.6546	4.7731
ENSMUSG00000024301	Kifc5b	1.4938	0.0024		8.8465	8.5677	8.5901	10.3691	10.3356	9.7426
ENSMUSG00000087496	Gm13523	1.492	0.013		4.4113	4.3774	4.5692	6.0311	5.5353	5.8119
ENSMUSG00000071456	1110002L01Rik	1.4913	0.0029		7.4741	7.395	7.4925	8.6833	8.9122	9.2677
ENSMUSG00000113792	Gm10933	1.4909	0.0508		3.9241	4.3148	3.7522	4.7873	5.9847	5.0372
ENSMUSG00000085956	4930481B07Rik	1.49	0.0181		4.8274	4.1806	4.6621	5.731	5.7774	6.2365
ENSMUSG00000018076	Med13l	1.4899	0.0046		9.8625	10.0178	9.6047	11.6834	11.5188	10.7623
ENSMUSG00000035890	Rnf126	1.4878	0.0009		10.3248	10.2584	10.4794	11.7862	11.6788	12.0836
ENSMUSG00000109341	Gm30873	1.4876	0.4227		2.8174	2.5278	4.7912	3.9387	3.0422	6.7778
ENSMUSG00000025025	Mxi1	1.4862	0.0241		10.1461	11.1183	9.6816	12.0068	12.2243	11.2005
ENSMUSG00000055407	Map6	1.4857	0.002		9.297	9.2898	9.2517	11.0952	10.8312	10.3642
ENSMUSG00000026199	Ankzf1	1.4853	0.0027		8.7747	9.2589	9.0124	10.8255	10.1651	10.5328
ENSMUSG00000101731	3830432H09Rik	1.4852	0.2009		4.5429	4.2493	4.2481	6.7151	4.0629	6.3622
ENSMUSG00000087252	Gm14379	1.4843	0.0679		3.0117	2.9133	3.8344	4.1063	4.2351	4.6988
ENSMUSG00000050270	Tmem220	1.4842	0.0403		4.4113	3.9527	3.5724	5.6788	4.9793	4.9112
ENSMUSG00000051379	Flrt3	1.4838	0.0359		6.8554	6.7223	8.4276	8.6154	8.6934	9.2677
ENSMUSG00000068739	Sars	1.4813	0.0034		12.1296	11.6387	12.4232	13.4312	13.3968	13.8267
ENSMUSG00000111481	Gm47652	1.4805	0.0211		4.0176	3.579	4.056	5.097	5.0731	5.2077
ENSMUSG00000118210	Gm50394	1.4793	0.0576		3.336	3.0733	3.252	3.847	4.8261	4.2558
ENSMUSG00000087610	Gm16253	1.4775	0.0591		3.183	3.2173	2.8396	3.749	4.0629	4.5375
ENSMUSG00000000567	Sox9	1.4767	0.0633		9.3109	8.8394	8.0603	10.8486	10.6337	9.0117
ENSMUSG00000030554	Synm	1.4761	0.0474		6.8929	7.5526	6.2895	8.8609	8.6598	7.3989
ENSMUSG00000042804	Gpr153	1.4728	0.0363		3.336	3.6819	3.1272	4.575	4.5926	4.2558
ENSMUSG00000036136	Fam110c	1.4725	0.009		5.2689	5.7876	5.7691	6.9646	7.329	6.7778
ENSMUSG00000041096	Tspyl2	1.4725	0.0016		7.9888	8.1898	8.3459	9.8204	9.4447	9.6956
ENSMUSG00000107085	Gm42883	1.4718	0.0685		3.0117	3.4682	2.671	3.847	3.9684	4.2558
ENSMUSG00000102881	Gm3807	1.4706	0.0206		4.0176	4.4375	4.1229	5.5683	5.1611	5.7396
ENSMUSG00000103899	Gm37940	1.4704	0.0082		5.343	5.3298	4.8712	6.5211	6.6189	6.5217
ENSMUSG00000035828	Pim3	1.4675	0.0042		10.2748	10.4958	9.9213	11.8741	12.0183	11.2247
ENSMUSG00000025386	Pde6g	1.4666	0.1589		2.3266	3.2173	3.1272	4.5167	3.5129	3.2468
ENSMUSG00000020424	Castor1	1.4665	0.0447		6.326	6.9247	5.9641	7.7265	8.6484	7.0411
ENSMUSG00000020359	Phykpl	1.4654	0.0021		8.0674	7.8575	8.1593	9.2757	9.4815	9.7519
ENSMUSG00000007655	Cav1	1.4642	0.0049		11.6436	11.0205	10.5929	12.5255	12.6303	12.5211
ENSMUSG00000024854	Pold4	1.4642	0.0102		7.152	7.539	7.1595	8.9978	9.0338	8.0862
ENSMUSG00000086370	Ftx	1.4641	0.0136		5.4807	5.8552	6.0865	7.5988	6.7666	7.3267
ENSMUSG00000093044	Snord8	1.464	0.0563		2.8174	3.2173	3.252	3.749	4.314	4.3559
ENSMUSG00000034667	Xpot	1.4639	0.0022		11.8724	11.4885	11.9335	13.3288	12.8971	13.4838
ENSMUSG00000015879	Fam184b	1.4626	0.0885		4.3407	5.051	3.3669	5.6246	4.9793	5.8468
ENSMUSG00000041028	Ghitm	1.4617	0.0016		12.1873	12.1096	11.9425	13.8416	13.6109	13.2148
ENSMUSG00000098091	Gm16470	1.4616	0.0721		3.183	3.0733	2.9906	4.2564	4.5279	3.4417
ENSMUSG00000058297	Spock2	1.4613	0.1555		2.5928	3.868	2.671	4.575	3.7586	3.4417
ENSMUSG00000115771	Gm49312	1.4593	0.0628		3.336	3.4682	3.9858	4.1833	5.0269	5.2077
ENSMUSG00000020275	Rel	1.4586	0.0704		8.2129	7.9061	7.36	10.2522	9.24	8.1363
ENSMUSG00000026544	Dusp23	1.458	0.0406		4.7748	5.4513	4.8317	6.9203	5.6614	6.5641
ENSMUSG00000078945	Naip2	1.4561	0.0335		5.065	4.1806	4.7494	6.4449	5.9104	5.498
ENSMUSG00000045795	Whamm	1.4556	0.0029		8.0454	8.1941	7.6253	9.4573	9.5726	9.1401
ENSMUSG00000085747	Slc13a2os	1.4553	0.2018		4.9746	6.648	7.2142	6.909	7.1789	9.3731
ENSMUSG00000003500	Impdh1	1.4536	0.0007		9.6797	9.8162	9.8515	11.2764	11.3428	11.1129
ENSMUSG00000117575	Gm36486	1.4534	0.0175		4.2664	4.4375	4.1229	5.7815	5.5679	5.2603
ENSMUSG00000087153	Gm6483	1.4519	0.0041		6.6223	6.2053	6.1837	7.8379	7.7182	7.6758
ENSMUSG00000108414	Snhg1	1.4499	0.0042		10.7203	11.1613	11.6697	12.5081	12.605	12.8075
ENSMUSG00000020766	Galk1	1.4497	0.0032		10.5846	10.9857	11.0696	12.02	12.2414	12.7454
ENSMUSG00000009291	Pttg1ip	1.4475	0.0009		11.9659	12.0216	12.2778	13.6277	13.6289	13.382
ENSMUSG00000049751	Rpl36al ENSMUSG00000049751	1.447	0.0551		3.6006	4.3148	4.7494	5.2117	5.2839	6.0988
ENSMUSG00000028978	Nos3	1.4468	0.0465		4.1054	3.6819	4.1229	5.7565	5.1178	4.6204
ENSMUSG00000006724	Cyp27b1	1.4457	0.1785		3.183	3.7779	4.1868	5.9672	3.7586	5.0372
ENSMUSG00000062127	Cttnbp2nl	1.4454	0.001		10.8649	10.5864	10.9635	12.1645	12.2053	12.4036
ENSMUSG00000094845	Tmem95	1.4447	0.0231		4.1054	3.7779	4.3068	5.4794	5.0731	5.3601
ENSMUSG00000028599	Tnfrsf1b	1.4444	0.0123		8.8655	8.506	9.1828	10.5224	10.7359	9.6095
ENSMUSG00000027323	Rad51	1.4438	0.0658		9.638	9.1886	8.1986	11.1045	10.78	9.349
ENSMUSG00000103632	Gm38329	1.4432	0.1303		4.1054	3.2173	2.671	4.326	4.7141	3.7668
ENSMUSG00000056216	Cebpg	1.4429	0.0007		10.8937	10.7618	10.7313	12.3001	12.0743	12.3643
ENSMUSG00000100002	Gm29642	1.4422	0.328		2.5928	3.579	2.48	2.558	4.7141	4.4496
ENSMUSG00000058656	Samd12	1.4408	0.1888		5.0205	6.0978	4.1868	7.1196	7.0348	4.9112
ENSMUSG00000032035	Ets1	1.4389	0.0102		11.2534	11.1905	11.8462	13.5346	12.6997	12.4138
ENSMUSG00000110400	Gm45416	1.4389	0.0625		3.6006	2.9133	3.5724	4.1833	4.8261	4.2558
ENSMUSG00000032114	Slc37a4	1.4383	0.009		8.2992	9.2485	8.2178	10.2886	10.0645	9.7052
ENSMUSG00000083836	Ldha-ps2	1.4381	0.1252		3.183	2.7334	2.671	3.847	4.314	3.0214
ENSMUSG00000044224	Dnajc21	1.4367	0.0009		9.5701	9.2979	9.3974	10.7171	10.9944	10.8762
ENSMUSG00000111594	Gm3365	1.4361	0.0102		5.576	5.265	5.7267	6.7786	7.2307	6.6652
ENSMUSG00000053192	Mllt11	1.4354	0.0052		7.6376	7.6824	7.7939	8.7225	9.2349	9.5179
ENSMUSG00000045746	B230317F23Rik	1.4349	0.0276		3.9241	4.6554	4.7064	6.0311	5.6309	5.4535
ENSMUSG00000078651	Aoc2	1.4347	0.0042		6.764	7.1478	7.1273	8.446	8.1958	8.7144
ENSMUSG00000107861	Gm44253	1.4346	0.038		3.6006	3.6819	3.4733	4.326	4.879	5.0372
ENSMUSG00000032902	Slc16a1	1.4342	0.0017		11.2647	10.7247	11.3098	12.604	12.5133	12.512
ENSMUSG00000106224	Gm43823	1.4342	0.0214		4.6635	4.5506	4.7064	6.0311	5.5019	6.3622
ENSMUSG00000034248	Slc25a37	1.4339	0.0047		8.7612	8.9569	8.8217	10.3113	10.7287	9.7882
ENSMUSG00000077990	NA	1.4317	0.0333		4.8782	4.1806	4.6621	6.0722	6.1659	5.2603
ENSMUSG00000031523	Dlc1	1.4305	0.2414		3.9241	4.5506	5.1207	4.2564	6.8747	6.7037
ENSMUSG00000037112	Sik2	1.4302	0.0051		10.3225	10.2479	10.1084	11.8842	12.0402	11.0702
ENSMUSG00000035530	Eif1	1.4275	0.0728		12.3277	12.2499	10.916	14.004	13.6451	12.2014
ENSMUSG00000111905	Gm48045	1.4271	0.179		3.183	2.5278	3.252	3.1248	4.0629	4.7731
ENSMUSG00000024776	Stambpl1	1.4266	0.0015		8.5388	8.2071	8.233	9.6443	9.9189	9.674
ENSMUSG00000038776	Ephx1	1.4261	0.0016		12.1955	11.7338	11.7968	13.5052	13.3992	13.1398
ENSMUSG00000107497	Gm44957	1.4246	0.1341		2.8174	2.7334	2.48	3.2731	3.0422	4.2558
ENSMUSG00000083669	Mif-ps4	1.4241	0.0454		3.336	3.4682	3.7522	4.2564	4.7141	5.0372
ENSMUSG00000074259	Gramd2	1.4231	0.1745		5.5132	5.6922	5.9083	8.643	6.6648	5.7396
ENSMUSG00000103357	Gm7804	1.42	0.1178		3.9241	3.4682	4.947	5.652	4.5279	5.8808
ENSMUSG00000038167	Plekhg6	1.4179	0.3446		4.0176	5.089	3.252	6.5061	6.0086	3.2468
ENSMUSG00000102466	Gm38200	1.4177	0.0474		3.9241	4.3148	4.6621	5.015	5.6913	6.0988
ENSMUSG00000035629	Rubcn	1.4167	0.0011		10.8499	11.0717	10.7539	12.4892	12.3703	12.0985
ENSMUSG00000048852	Gm12185	1.4162	0.224		2.3266	3.579	2.9906	4.7873	3.2167	3.4417
ENSMUSG00000097817	Gm26810	1.4159	0.2047		2.8174	3.0733	2.48	4.575	3.5129	2.7541
ENSMUSG00000032332	Col12a1	1.4148	0.336		6.251	5.642	9.8528	8.1855	8.0067	10.1173
ENSMUSG00000034308	Sdr42e1	1.4142	0.0279		4.1881	5.0121	4.6164	6.0518	5.5019	6.1555
ENSMUSG00000035640	Cbarp	1.4126	0.0068		7.9596	8.4415	7.4988	9.3339	9.6258	9.1189
ENSMUSG00000022742	Cpox	1.4106	0.0013		10.2119	10.0361	10.4266	11.713	11.434	11.7861
ENSMUSG00000038780	Smurf1	1.4098	0.0009		10.9014	11.0604	10.9041	12.5726	12.4006	12.1557
ENSMUSG00000025507	Pidd1	1.4089	0.04		7.9772	7.7131	7.8444	10.0791	9.2222	8.3086
ENSMUSG00000085586	Gm11613	1.4088	0.1737		4.0176	5.642	3.9121	6.1317	6.4717	4.5375
ENSMUSG00000090812	Samd15	1.4049	0.2328		2.3266	2.9133	3.7522	4.4559	3.0422	4.1482
ENSMUSG00000087575	Gm12976	1.4042	0.1138		3.0117	3.4682	2.9906	3.847	4.9793	3.6134
ENSMUSG00000087213	2810408I11Rik	1.4041	0.0244		5.694	4.9308	5.8304	6.4449	6.8877	7.1977
ENSMUSG00000026979	Psd4	1.404	0.0495		5.1907	5.7166	5.0537	6.4604	7.4476	5.9783
ENSMUSG00000102714	Gm37618	1.4039	0.1383		3.183	3.868	3.1272	4.326	5.3603	3.6134
ENSMUSG00000036452	Arhgap26	1.4036	0.0488		4.6635	5.1971	5.3049	6.9315	6.5553	5.5412
ENSMUSG00000104154	Gm38104	1.4033	0.0564		3.6006	3.579	4.6164	5.0566	4.879	5.4535
ENSMUSG00000031585	Gtf2e2	1.403	0.0027		9.1133	9.238	9.1126	10.4257	10.9725	10.2791
ENSMUSG00000049871	Nlrc3	1.4029	0.1737		3.183	3.579	3.7522	5.652	4.6546	3.4417
ENSMUSG00000001020	S100a4	1.402	0.0338		4.8274	4.0328	4.1229	5.2117	5.6913	5.7762
ENSMUSG00000097320	Tmem147os	1.4012	0.0065		5.9526	6.6353	6.23	7.694	7.7255	7.5009
ENSMUSG00000024552	Slc14a2	1.4004	0.2253		3.336	4.1086	2.8396	3.4076	5.5019	4.6204
ENSMUSG00000024587	Nars	1.399	0.0045		12.6715	11.9441	12.6651	13.7885	13.6466	14.0675
ENSMUSG00000035293	G2e3	1.399	0.0014		10.779	10.5125	10.5326	12.1757	12.1401	11.7335
ENSMUSG00000020334	Slc22a4	1.3985	0.0296		5.803	6.2728	6.6257	8.1761	7.6206	6.9318
ENSMUSG00000113185	Gm47127	1.3959	0.0522		3.4743	3.0733	3.1272	3.9387	4.314	4.4496
ENSMUSG00000112532	Gm36283	1.3953	0.2657		4.7202	3.868	6.1197	6.1888	4.879	7.7234
ENSMUSG00000025880	Smad7	1.3933	0.0056		9.9804	9.9967	10.8038	11.5046	11.5507	11.9412
ENSMUSG00000039395	Mreg	1.3933	0.0362		5.1907	5.0121	5.4682	7.1773	6.4717	5.8808
ENSMUSG00000108095	Gm44067	1.3931	0.0616		3.336	3.0733	3.9121	4.3924	4.314	4.8438
ENSMUSG00000036492	Rnf39	1.3908	0.0029		7.4151	7.6637	7.6763	9.0084	8.7478	9.1952
ENSMUSG00000060716	Plekhh1	1.3906	0.001		9.1396	9.5225	9.2721	10.7797	10.6105	10.7393
ENSMUSG00000102813	Gm37795	1.3903	0.0082		6.3798	6.3373	6.8692	7.6404	7.902	8.225
ENSMUSG00000005686	Ampd3	1.3901	0.0074		11.3989	11.6214	10.5418	12.6682	12.5695	12.5272
ENSMUSG00000105636	Gm43625	1.3893	0.0371		4.1054	3.6819	3.6651	4.6311	5.0269	5.2603
ENSMUSG00000113750	Gm5628	1.388	0.1995		2.5928	3.0733	3.4733	4.685	3.0422	4.3559
ENSMUSG00000026317	Cln8	1.3871	0.0086		9.957	9.8758	9.1591	11.4428	11.0845	10.6096
ENSMUSG00000048997	Atxn7l2	1.3864	0.0107		7.8747	7.9114	8.3736	9.2823	9.0826	10.0404
ENSMUSG00000074578	Zfas1	1.3859	0.0173		9.8095	10.5881	10.5008	11.0112	11.8509	12.2231
ENSMUSG00000110256	Gm45412	1.3853	0.0622		3.4743	3.7779	3.3669	4.1833	4.5926	5.2077
ENSMUSG00000030254	Rad18	1.385	0.0041		10.2629	9.4587	10.0201	11.5585	11.2059	11.1439
ENSMUSG00000054321	Taf4b	1.3813	0.0095		8.4577	8.0477	8.3283	10.2297	9.3115	9.3879
ENSMUSG00000024201	Kdm4b	1.3805	0.0173		10.0947	11.0587	9.8304	11.9422	11.9535	11.2575
ENSMUSG00000112008	Gm47218	1.3798	0.0781		4.1054	3.868	3.1272	5.2117	4.6546	4.3559
ENSMUSG00000026167	Wnt10a	1.3797	0.0799		3.6006	4.3774	4.947	5.8539	4.93	5.8468
ENSMUSG00000098090	2700099C18Rik	1.3796	0.0018		7.8872	7.8464	7.8444	9.1614	9.4314	9.101
ENSMUSG00000025983	Ccdc150	1.379	0.2079		2.5928	2.5278	4.1868	4.2564	3.5129	4.0319
ENSMUSG00000028212	Ccne2	1.3789	0.0368		10.407	9.8703	10.6739	12.6886	11.3748	11.0656
ENSMUSG00000041040	Fam117b	1.3789	0.0037		10.0289	10.1913	9.7104	11.4843	11.6511	10.9442
ENSMUSG00000018995	Nars2	1.378	0.002		8.006	7.7726	8.2667	9.4239	9.4248	9.3337
ENSMUSG00000103591	Gm38365	1.3764	0.0522		4.1054	3.7779	3.4733	4.4559	5.2441	5.0372
ENSMUSG00000061082	Plac1	1.3739	0.2818		2.5928	2.9133	4.8712	4.3924	3.641	5.3111
ENSMUSG00000022253	Nadk2	1.3725	0.004		10.1957	10.6265	9.9641	11.7494	11.8848	11.2934
ENSMUSG00000084013	Gm14270	1.372	0.0973		3.6006	3.0733	3.4733	3.9387	4.2351	5.2077
ENSMUSG00000025324	Atp10a	1.3717	0.0029		8.424	8.081	8.7065	9.9348	9.62	9.7859
ENSMUSG00000023043	Krt18	1.3702	0.002		13.0525	13.2165	13.5031	14.6991	14.8256	14.3906
ENSMUSG00000052632	Asap2	1.37	0.0856		9.1	9.2548	8.4635	11.058	10.7921	8.9728
ENSMUSG00000036894	Rap2b	1.3697	0.004		9.1499	8.6931	8.7963	10.577	10.2616	9.873
ENSMUSG00000033021	Gmppa	1.369	0.0017		9.173	9.446	9.6149	10.7187	10.6614	11.0033
ENSMUSG00000024516	Sec11c	1.3687	0.0053		9.218	8.5372	9.3031	10.6483	10.1409	10.3821
ENSMUSG00000046111	Cep295	1.3686	0.0041		10.4611	10.1118	9.7911	11.7679	11.5629	11.1474
ENSMUSG00000117080	1700063J08Rik	1.3686	0.1542		3.183	2.7334	3.8344	3.749	3.9684	5.0963
ENSMUSG00000074604	Mgst2	1.3669	0.1507		3.336	5.8104	4.056	5.4486	5.6913	5.5412
ENSMUSG00000103593	Gm37352	1.3669	0.0013		8.1158	8.3546	8.3598	9.5709	9.6771	9.7075
ENSMUSG00000053925	Gm9929	1.3665	0.2645		3.6006	2.2879	3.4733	3.1248	4.5279	4.2558
ENSMUSG00000104325	Gm37321	1.3637	0.0286		4.1881	4.1806	4.3632	5.0566	5.5997	5.7396
ENSMUSG00000002043	Trappc6a	1.3636	0.0049		8.9861	9.9199	9.724	11.0341	10.904	10.8237
ENSMUSG00000022203	Efs	1.3633	0.327		2.3266	2.9133	2.2599	4.5167	2.6132	2.4258
ENSMUSG00000100975	Gm28875	1.3626	0.1451		6.5301	6.7698	5.3334	8.5695	7.4822	6.2881
ENSMUSG00000097259	Gm26766	1.3625	0.0533		3.7167	3.3482	4.1229	5.1745	4.5279	4.7731
ENSMUSG00000115602	Gm7908	1.3623	0.0972		3.6006	3.3482	3.252	3.847	4.3889	5.2077
ENSMUSG00000026796	Niban2	1.3619	0.0029		11.8467	12.1429	12.2335	13.528	13.741	13.0749
ENSMUSG00000002057	Foxn1	1.3603	0.2294		3.4743	6.0601	3.3669	5.8773	5.1178	5.0963
ENSMUSG00000103846	Gm37809	1.36	0.1716		2.5928	3.579	3.8344	3.6439	4.93	4.4496
ENSMUSG00000085101	Platr16	1.3585	0.1102		3.183	2.7334	3.5724	3.9387	3.7586	4.6988
ENSMUSG00000024413	Npc1	1.3584	0.0155		10.1832	10.0482	9.8589	12.0898	11.38	10.7088
ENSMUSG00000038564	Ift172	1.3564	0.0016		10.0526	10.2739	9.7743	11.5603	11.3777	11.2485
ENSMUSG00000064307	Lrrc51	1.3557	0.0686		4.6635	6.0978	4.5204	6.0518	6.7238	6.2625
ENSMUSG00000104347	Gm37689	1.3546	0.0993		3.183	3.7779	3.252	4.3924	5.0731	3.7668
ENSMUSG00000030513	Pcsk6	1.3544	0.2341		2.8174	3.3482	2.671	3.9387	4.7712	2.7541
ENSMUSG00000071856	Mcc	1.3544	0.002		9.9977	10.0602	10.2794	11.8069	11.271	11.3537
ENSMUSG00000041959	S100a10	1.3541	0.0029		11.9493	11.6076	12.2458	13.0907	13.2867	13.5073
ENSMUSG00000024493	Lars	1.3533	0.0062		11.8291	11.3784	12.1915	13.1553	12.8418	13.4803
ENSMUSG00000020641	Rsad2	1.352	0.1123		4.1054	4.4375	3.6651	5.9672	5.2839	4.2558
ENSMUSG00000092626	9130230N09Rik	1.3504	0.1139		3.336	3.868	3.4733	5.3848	3.8673	4.6204
ENSMUSG00000020142	Slc1a4	1.3499	0.0013		10.3017	10.1187	10.1073	11.7203	11.2827	11.5944
ENSMUSG00000024014	Pim1	1.3485	0.0032		9.3293	9.2359	9.683	10.8843	11.0079	10.4159
ENSMUSG00000037071	Scd1	1.3483	0.0112		11.4146	10.8936	11.1207	12.6894	12.9855	11.8422
ENSMUSG00000024381	Bin1	1.3481	0.0046		8.5739	8.8113	9.2442	9.9292	10.3579	10.4503
ENSMUSG00000070305	Mpzl3	1.3479	0.0043		7.7234	7.8353	7.367	9.2105	8.9713	8.7049
ENSMUSG00000111491	Gm47503	1.347	0.0789		3.336	3.7779	3.1272	3.9387	4.7712	4.6204
ENSMUSG00000022505	Emp2	1.3469	0.04		11.0981	11.5875	10.2995	12.6661	12.8522	11.5534
ENSMUSG00000029875	Ccdc184	1.3451	0.1148		5.5132	5.5084	4.6621	6.8746	7.1469	5.2603
ENSMUSG00000051008	4930412M03Rik	1.345	0.0521		3.6006	3.0733	3.4733	4.1833	4.5279	4.4496
ENSMUSG00000085971	Gm15411	1.3437	0.1155		3.4743	3.4682	2.671	3.749	4.5279	4.0319
ENSMUSG00000095205	NA	1.3436	0.2252		2.5928	2.7334	4.5692	3.9387	4.0629	4.5375
ENSMUSG00000054065	Pkp3	1.3434	0.2177		5.4807	6.9963	5.5676	8.0378	8.1209	5.5831
ENSMUSG00000000154	Slc22a18	1.3425	0.2001		4.1054	5.1971	3.6651	6.2793	5.8321	4.1482
ENSMUSG00000097882	0610038B21Rik	1.3395	0.0367		4.9746	5.2315	5.9458	6.4133	6.4368	7.2507
ENSMUSG00000093553	Gm20633	1.3365	0.0458		4.7202	4.8447	5.5914	6.7786	5.7493	6.4096
ENSMUSG00000117768	8030456M14Rik	1.3358	0.0238		4.7202	4.7051	5.3614	6.4758	5.9604	6.0696
ENSMUSG00000109154	Gm44822	1.3332	0.0799		4.9746	4.3148	3.8344	4.9282	5.6913	6.0398
ENSMUSG00000037295	Ldlrap1	1.3319	0.0203		9.9555	10.4187	9.6705	11.8065	11.6458	10.6007
ENSMUSG00000096923	A730071L15Rik	1.3317	0.048		3.183	3.3482	3.3669	4.5167	4.0629	4.2558
ENSMUSG00000036693	Nop14	1.3316	0.0009		10.012	9.8191	9.865	11.1236	11.2729	11.313
ENSMUSG00000086849	Gm13840	1.3311	0.1072		3.7167	3.579	3.4733	4.0249	5.5019	4.4496
ENSMUSG00000029407	Uso1	1.3298	0.1796		11.1397	10.9983	8.9214	12.275	12.3361	10.436
ENSMUSG00000113984	Gm48890	1.3297	0.1263		3.183	2.7334	3.252	3.5306	3.7586	4.6988
ENSMUSG00000029436	Mmp17	1.3296	0.0931		5.8546	5.8104	5.5676	7.4352	7.7036	5.7762
ENSMUSG00000033278	Ptprm	1.3295	0.0015		9.1806	9.193	9.1451	10.757	10.458	10.2918
ENSMUSG00000022895	Ets2	1.3292	0.0066		10.0786	10.3413	10.097	12.0951	11.2549	11.1827
ENSMUSG00000031075	Ano1	1.3269	0.0503		9.439	10.9023	9.5781	11.6925	11.6396	10.5905
ENSMUSG00000021379	Id4	1.3267	0.1274		8.0174	8.1454	6.1837	9.5781	8.3629	8.1007
ENSMUSG00000085705	Gm16046	1.3265	0.0221		5.803	6.6224	7.1191	7.7005	7.8697	7.9724
ENSMUSG00000103970	Gm37678	1.3259	0.1475		2.8174	2.5278	3.252	3.4076	3.3724	4.3559
ENSMUSG00000086401	Gm15559	1.3254	0.1156		3.4743	3.4682	3.252	5.248	3.8673	4.0319
ENSMUSG00000079614	Seh1l	1.3253	0.0037		11.234	11.0436	10.8316	12.7927	12.2615	12.068
ENSMUSG00000097113	Gm19705	1.3245	0.3242		4.0176	3.4682	5.1531	3.847	5.7493	6.9154
ENSMUSG00000026235	Epha4	1.3244	0.0182		8.8402	8.8859	10.1135	10.6183	10.4913	10.7714
ENSMUSG00000036737	Oxsr1	1.3238	0.0008		10.6663	10.8362	10.7253	12.0217	12.2172	11.9883
ENSMUSG00000019978	Epb41l2	1.3229	0.0026		10.0457	9.6453	10.2748	11.3986	11.4162	11.1447
ENSMUSG00000029161	Cgref1	1.3221	0.2568		3.183	2.5278	3.7522	4.4559	3.0422	4.7731
ENSMUSG00000085091	Egfros	1.3211	0.1373		4.5429	5.265	4.9835	7.3708	5.397	5.6239
ENSMUSG00000012123	Crybg2	1.3205	0.0816		5.4135	5.3298	4.8712	6.4449	7.2708	5.498
ENSMUSG00000053604	Rpia	1.3204	0.0074		8.8935	8.5644	9.5915	10.2831	10.2997	10.4769
ENSMUSG00000024769	Cdc42bpg	1.3203	0.1151		10.054	10.5072	9.7064	12.5095	11.717	10.0176
ENSMUSG00000021226	Acot2	1.3199	0.0128		9.0566	9.6374	8.7521	10.3421	10.1218	10.975
ENSMUSG00000092341	Malat1	1.3198	0.0113		17.6555	18.1316	17.1102	19.2552	18.8736	18.7753
ENSMUSG00000021974	Fgf9	1.3197	0.0579		8.5815	8.513	7.1026	9.5199	9.8056	8.6518
ENSMUSG00000110622	Iqcn	1.3186	0.1209		3.183	3.0733	3.252	4.575	3.3724	4.4496
ENSMUSG00000097007	4930432B10Rik	1.3157	0.1034		3.9241	3.6819	4.2481	4.8827	4.46	6.0094
ENSMUSG00000104877	Gm42651	1.3155	0.1979		3.0117	3.7779	3.4733	3.4076	5.0269	5.0963
ENSMUSG00000031438	Rnf128	1.3142	0.0112		10.1001	9.7318	9.1002	10.9711	11.2986	10.5827
ENSMUSG00000032826	Ank2	1.3123	0.16		4.1881	3.9527	5.3889	5.7052	4.8261	6.7037
ENSMUSG00000029095	Ablim2	1.311	0.2438		4.5429	5.7166	4.6164	7.2236	6.6497	4.4496
ENSMUSG00000035506	Slc12a8	1.3089	0.0084		5.4475	5.5084	5.6149	6.8629	6.8217	6.6256
ENSMUSG00000112880	Gm20337	1.3081	0.1013		3.9241	3.3482	4.3632	5.417	4.314	5.153
ENSMUSG00000024235	Map3k8	1.3077	0.0412		5.0205	4.6554	5.6149	6.7909	6.2079	5.914
ENSMUSG00000044934	Zfp367	1.3071	0.0152		10.7665	10.5125	10.9766	12.7944	11.8816	11.5442
ENSMUSG00000101603	Gm28730	1.306	0.0327		4.0176	4.0328	4.1868	5.0566	5.0269	5.5831
ENSMUSG00000087222	E030042O20Rik	1.3056	0.0244		4.6045	4.1086	4.3068	5.4794	5.397	5.5831
ENSMUSG00000050195	Scd4	1.3045	0.0722		5.1907	5.9198	4.9096	7.1773	6.6648	5.7396
ENSMUSG00000096971	4930556M19Rik	1.3015	0.029		5.5449	6.1345	5.4158	7.3872	6.9384	6.4327
ENSMUSG00000000811	Txnrd3	1.3014	0.0227		10.9377	10.0721	9.8552	11.7839	11.9723	11.0177
ENSMUSG00000041945	Mfsd9	1.301	0.0046		8.7131	8.5878	8.2996	10.1952	9.6335	9.6321
ENSMUSG00000054612	Mgmt	1.3005	0.0236		6.3798	6.079	6.4674	8.1331	7.4736	7.0411
ENSMUSG00000050944	Efcab5	1.2995	0.2561		4.8274	5.0121	4.2481	7.1583	6.1006	4.1482
ENSMUSG00000035310	NA	1.2991	0.0045		10.1679	9.6196	9.7009	11.3879	11.2258	10.7714
ENSMUSG00000022637	Cblb	1.2985	0.0244		9.7563	9.8345	9.0146	11.481	10.7403	10.2485
ENSMUSG00000104528	Gm43314	1.2984	0.1398		4.1054	3.3482	2.8396	4.0249	4.1515	4.9112
ENSMUSG00000110206	Flt3l	1.298	0.0479		3.7167	3.868	3.7522	4.4559	5.2032	4.9112
ENSMUSG00000035509	Fbxl21	1.2978	0.0432		6.0664	6.7223	6.0353	7.4664	8.2216	6.8654
ENSMUSG00000102841	Gm38036	1.2978	0.2324		4.1054	2.7334	3.3669	4.575	5.0269	3.2468
ENSMUSG00000085385	Snhg17	1.2976	0.014		9.4516	9.6596	10.3228	10.9744	10.7634	11.6454
ENSMUSG00000031803	B3gnt3	1.2973	0.0181		10.3643	10.8341	10.058	11.8004	12.2776	11.0985
ENSMUSG00000052684	Jun	1.2966	0.0333		10.1932	10.5563	10.3871	12.6632	11.1877	11.2164
ENSMUSG00000035845	Alg12	1.2959	0.002		9.0005	8.9748	9.0212	10.5779	10.1011	10.2088
ENSMUSG00000117372	Gm49972	1.2959	0.2266		2.8174	2.5278	3.7522	3.1248	4.314	4.2558
ENSMUSG00000028893	Sesn2	1.2953	0.0017		10.0498	9.9303	9.7678	11.4675	11.102	11.0767
ENSMUSG00000035969	Rusc2	1.2946	0.0017		11.5306	11.4814	11.5245	13.1002	12.7985	12.5591
ENSMUSG00000035992	Fnip1	1.2944	0.0081		10.8546	10.4976	10.7539	12.5989	11.7991	11.6273
ENSMUSG00000000531	Tamalin	1.2943	0.01		6.5301	7.218	6.8496	7.9133	8.4529	8.0934
ENSMUSG00000057666	Gapdh	1.2941	0.0014		15.9006	16.0334	15.8258	17.2435	17.2572	17.1758
ENSMUSG00000042507	Mideas	1.2939	0.0013		10.5449	10.6192	10.3165	11.9335	11.6237	11.8281
ENSMUSG00000022265	Ank	1.2937	0.0322		8.5029	8.9047	7.9904	10.1078	10.1205	8.9569
ENSMUSG00000065418	Mir322	1.293	0.1016		2.8174	3.2173	3.4733	3.6439	4.2351	4.4496
ENSMUSG00000015702	Anxa9	1.2928	0.0436		6.251	6.501	6.0526	8.1714	6.7805	7.6063
ENSMUSG00000042473	Tbc1d8b	1.2924	0.0225		9.2923	9.1101	8.1751	10.3814	10.3764	9.6146
ENSMUSG00000059456	Ptk2b	1.2923	0.0036		9.1421	9.0584	9.2758	10.6951	10.6075	10.046
ENSMUSG00000047554	Tmem41b	1.291	0.0049		10.2437	10.0967	10.2712	11.9838	11.4146	11.1129
ENSMUSG00000026031	Cflar	1.2909	0.0066		11.2395	11.1861	10.8832	12.844	12.4808	11.8993
ENSMUSG00000065118	Gm23297	1.2903	0.0619		3.336	3.6819	3.7522	4.9723	4.6546	4.1482
ENSMUSG00000019487	Trip10	1.29	0.0023		10.5596	10.7677	10.3931	11.8705	12.1337	11.6141
ENSMUSG00000111069	Gm48646	1.2898	0.0993		4.7202	4.4375	4.6621	4.9282	5.9356	6.6455
ENSMUSG00000111664	Gm48865	1.2898	0.024		4.5429	4.7051	4.3068	5.9003	5.5019	5.5831
ENSMUSG00000020893	Per1	1.2894	0.2407		9.9555	10.0141	8.1311	11.4545	11.485	8.8917
ENSMUSG00000092035	Peg10	1.288	0.1039		8.271	6.3373	7.8041	8.8725	8.0126	9.3938
ENSMUSG00000018848	Rars	1.2876	0.0018		11.2825	10.9687	11.4245	12.4364	12.6759	12.4535
ENSMUSG00000067787	Blcap	1.287	0.0016		9.5251	9.7393	9.9143	10.85	11.1158	11.1093
ENSMUSG00000045414	Dipk2a	1.286	0.0047		8.8078	8.5711	9.1887	10.2842	9.851	10.3261
ENSMUSG00000055313	Pgbd1	1.2841	0.2011		3.183	2.7334	3.6651	4.685	3.2167	4.4496
ENSMUSG00000002603	Tgfb1	1.284	0.0984		6.764	7.4025	5.9272	7.8905	8.7654	7.0709
ENSMUSG00000032812	Arap1	1.2838	0.0027		8.915	8.8533	8.593	10.1455	10.2579	9.7837
ENSMUSG00000102565	Gm37036	1.2836	0.1922		2.5928	3.7779	3.7522	3.749	4.2351	5.0372
ENSMUSG00000106028	Gm8493	1.2828	0.0526		3.4743	4.0328	4.3068	4.7873	5.2032	5.0963
ENSMUSG00000020964	Sel1l	1.2824	0.0116		11.6618	11.5628	11.1042	13.3569	12.5183	12.3484
ENSMUSG00000032525	Nktr	1.282	0.0024		11.2094	11.2051	10.9225	12.6477	12.4822	12.0899
ENSMUSG00000017167	Cntnap1	1.2819	0.0271		5.2689	5.9816	5.705	7.1678	6.4011	7.1144
ENSMUSG00000094595	Fsbp	1.2812	0.0082		6.192	6.1525	6.0526	7.4431	7.5652	7.0855
ENSMUSG00000103901	Gm37499	1.2808	0.0304		5.3787	5.265	4.947	6.2968	6.8877	5.9465
ENSMUSG00000047875	Gpr157	1.2802	0.2186		5.1907	5.4513	5.3334	7.4114	7.2609	4.7731
ENSMUSG00000032226	Gcnt3	1.2799	0.4519		5.065	6.4726	3.4733	6.8032	7.5243	3.7668
ENSMUSG00000097261	4930532G15Rik	1.2795	0.2595		3.0117	2.5278	3.3669	4.1063	2.8436	4.6204
ENSMUSG00000109325	Krt8-ps	1.2794	0.09		3.6006	3.2173	3.252	3.847	4.314	4.8438
ENSMUSG00000112879	Gm47726	1.2787	0.1313		3.8241	3.2173	2.8396	3.749	4.1515	4.6988
ENSMUSG00000028059	Arhgef2	1.2782	0.0026		11.8763	11.8633	11.6791	13.3271	12.7391	13.2177
ENSMUSG00000029610	Aimp2	1.2779	0.0026		9.3497	9.3555	9.7454	10.5973	10.7151	11.0148
ENSMUSG00000084497	Gm22107	1.2773	0.0447		4.3407	4.4375	4.6164	5.417	5.2839	6.2365
ENSMUSG00000024042	Sik1	1.277	0.0102		10.2303	10.6345	10.7172	12.281	11.9317	11.2445
ENSMUSG00000021091	Serpina3n	1.276	0.2527		3.6006	3.579	2.9906	5.2117	4.7141	3.0214
ENSMUSG00000027007	Itprid2	1.2759	0.0212		9.2031	9.1688	8.2593	10.4187	10.3845	9.5813
ENSMUSG00000078942	Naip6	1.274	0.1322		3.7167	3.6819	3.1272	4.7873	4.93	3.6134
ENSMUSG00000104687	Gm42899	1.2736	0.1085		3.336	3.7779	4.5204	4.575	4.7712	5.5831
ENSMUSG00000030583	Sipa1l3	1.2712	0.0167		11.5842	11.6186	10.8928	13.0842	12.8303	12.0447
ENSMUSG00000086368	Gm13830	1.2712	0.0319		4.0176	4.3148	4.1868	5.1362	5.1611	5.5831
ENSMUSG00000025348	Itga7	1.2709	0.0105		8.9539	9.3613	10.1186	10.7396	10.773	10.7927
ENSMUSG00000085633	Bloc1s6os	1.2705	0.1321		2.8174	3.7779	3.9121	4.685	3.9684	4.7731
ENSMUSG00000027489	Necab3	1.2702	0.1255		4.4113	5.051	5.4937	7.0596	5.2839	6.183
ENSMUSG00000051977	Prdm9	1.2693	0.0145		7.1725	7.4616	6.8692	8.8638	8.2867	8.0342
ENSMUSG00000113303	4930423D22Rik	1.2682	0.118		4.1054	3.0733	3.8344	5.2117	4.2351	4.4496
ENSMUSG00000003721	Insig2	1.2681	0.0282		9.3764	9.2443	8.4667	10.6885	10.5475	9.5813
ENSMUSG00000045763	Basp1	1.268	0.0985		10.173	9.9013	11.6581	11.4081	11.4368	12.7166
ENSMUSG00000064342	mt-Ti	1.2675	0.1449		3.7167	3.4682	4.7064	4.9723	4.3889	5.8468
ENSMUSG00000049357	Brd8dc	1.2665	0.0692		3.8241	4.5506	4.6164	5.1745	5.2032	6.0988
ENSMUSG00000028849	Map7d1	1.2661	0.0039		10.8299	10.8889	10.7943	12.2952	12.3935	11.6595
ENSMUSG00000100620	Gm28277	1.2653	0.084		2.8174	3.579	3.252	4.1063	3.9684	4.2558
ENSMUSG00000026259	Ngef	1.2652	0.2389		7.8174	8.4777	6.23	9.3062	9.509	7.1427
ENSMUSG00000031232	Magt1	1.2643	0.0015		11.0261	11.0841	11.2142	12.6281	12.264	12.2575
ENSMUSG00000034586	Hid1	1.2636	0.0012		9.6992	9.6485	9.4324	10.761	10.9175	10.9065
ENSMUSG00000100625	1700016G22Rik	1.2632	0.4061		3.0117	2.2879	2.8396	4.7873	2.339	3.4417
ENSMUSG00000032400	Zwilch	1.2621	0.0041		10.0512	9.3901	9.926	11.2554	11.0263	10.8826
ENSMUSG00000022498	Txndc11	1.2612	0.0019		9.7898	9.4945	9.6236	10.9478	10.6876	11.0757
ENSMUSG00000032409	Atr	1.2611	0.0013		10.5311	10.5537	10.8478	11.8015	12.0234	11.9189
ENSMUSG00000051650	B3gnt2	1.2607	0.0312		4.1054	4.2493	4.2481	5.5683	5.2441	5.0372
ENSMUSG00000045744	Bricd5	1.2606	0.1925		3.183	4.0328	3.4733	5.2834	4.8261	3.4417
ENSMUSG00000085196	Gm14963	1.2594	0.0227		4.3407	4.3148	4.4176	5.417	5.4329	5.5831
ENSMUSG00000071454	Dtnb	1.2589	0.0049		10.3259	10.5333	10.1561	11.5981	11.999	11.2189
ENSMUSG00000096346	NA	1.2583	0.2032		3.0117	2.5278	3.6651	3.2731	4.3889	4.0319
ENSMUSG00000108216	Gm44153	1.2582	0.1641		3.8241	3.4682	2.9906	3.6439	5.1178	4.3559
ENSMUSG00000097352	C920009B18Rik	1.2581	0.0348		5.0205	4.2493	4.8317	5.6246	6.0782	5.8119
ENSMUSG00000042354	Gnl3	1.2556	0.0075		10.1857	9.6923	10.5047	11.295	11.1652	11.7195
ENSMUSG00000105510	Gm43815	1.2553	0.0509		4.5429	4.7532	4.4176	5.1362	6.1227	5.914
ENSMUSG00000105656	Gm43017	1.2545	0.0678		4.0176	4.1806	3.9121	4.5167	5.4329	5.4535
ENSMUSG00000063851	Rnf183	1.2541	0.0778		6.6663	7.6574	6.2748	8.4538	8.4874	7.2112
ENSMUSG00000097226	Gm26600	1.2539	0.0714		3.6006	3.0733	3.252	4.3924	3.9684	4.2558
ENSMUSG00000040359	Ufl1	1.2535	0.0018		10.2677	10.147	9.8577	11.4881	11.3304	11.2272
ENSMUSG00000039372	Marchf4	1.2532	0.1663		3.183	3.3482	4.7064	4.9723	4.1515	5.153
ENSMUSG00000022844	Pdia5	1.2521	0.0195		8.5349	8.513	7.9262	10.1139	9.4772	9.0421
ENSMUSG00000026672	Optn	1.2518	0.0016		9.1186	8.8642	9.0835	10.4037	10.2838	10.135
ENSMUSG00000051890	Klhdc1	1.2517	0.1632		5.3064	6.1525	6.0179	8.3533	6.5057	6.1274
ENSMUSG00000032641	Gpr19	1.2516	0.0229		7.4575	7.055	7.7836	9.2356	8.4309	8.3024
ENSMUSG00000047821	Trim16	1.2488	0.0014		9.7731	9.9395	10.0718	11.2043	11.0459	11.313
ENSMUSG00000012296	Tjap1	1.2479	0.002		9.7409	10.0054	10.0002	11.4041	11.1625	10.9492
ENSMUSG00000109958	Gm32786	1.2477	0.1747		2.8174	3.0733	3.6651	4.8827	3.641	3.6134
ENSMUSG00000028179	Cth	1.2472	0.0035		9.8514	9.2775	9.2813	10.6694	10.6154	10.872
ENSMUSG00000109363	Gm44668	1.2472	0.071		5.4135	5.8985	4.5204	6.2074	6.9133	6.1274
ENSMUSG00000042677	Zc3h12a	1.2471	0.0092		6.6949	6.9142	6.4015	8.0169	8.0185	7.5961
ENSMUSG00000102191	Gm36569	1.2469	0.4545		2.8174	2.5278	3.4733	4.3924	2.339	5.2077
ENSMUSG00000018821	Avpi1	1.2462	0.0043		9.462	9.802	9.8216	11.2665	10.9907	10.5866
ENSMUSG00000028124	Gclm	1.2458	0.0184		11.2742	10.6289	10.64	12.6788	11.5364	12.0931
ENSMUSG00000042793	Lgr6	1.2458	0.3446		2.5928	3.0733	5.5188	4.685	4.0629	5.0372
ENSMUSG00000004661	Arid3b	1.2457	0.023		5.5449	5.8104	5.4937	6.3645	7.1142	6.9952
ENSMUSG00000037887	Dusp8	1.2456	0.0253		9.1186	9.392	9.4488	11.2934	9.9126	10.5072
ENSMUSG00000020873	Slc35b1	1.2455	0.0028		10.2315	10.0661	10.4174	11.7367	11.204	11.5395
ENSMUSG00000032271	Nnmt	1.2455	0.0543		5.7765	5.2978	6.6486	6.8512	6.9631	7.6265
ENSMUSG00000027422	Rrbp1	1.2452	0.0027		11.5918	11.5022	11.1349	12.8099	12.7613	12.4315
ENSMUSG00000077394	Gm24339	1.2451	0.031		7.7024	8.0477	8.4603	9.0189	8.9743	10.0848
ENSMUSG00000003814	Calr	1.2446	0.0109		13.5789	13.3387	14.21	15.3282	14.6789	14.886
ENSMUSG00000034327	Kctd9	1.2439	0.0408		9.7997	9.5277	8.6845	11.2543	10.435	9.9925
ENSMUSG00000085148	Mir22hg	1.2432	0.0155		7.9117	7.8014	8.3424	8.907	9.1406	9.8323
ENSMUSG00000084572	NA	1.2422	0.0832		3.6006	2.9133	3.4733	4.1063	4.3889	4.1482
ENSMUSG00000105613	Gm43684	1.2422	0.2292		3.336	4.1806	2.671	4.9723	3.641	4.0319
ENSMUSG00000004069	Dnaja3	1.2418	0.0009		10.8937	10.8815	10.7729	12.1648	12.0131	12.1218
ENSMUSG00000021482	Prxl2c	1.2415	0.0013		10.3798	10.522	10.2739	11.5453	11.5795	11.7972
ENSMUSG00000098714	Mir7663	1.241	0.105		3.336	3.0733	3.1272	4.3924	4.2351	3.4417
ENSMUSG00000024594	Prrc1	1.2397	0.0053		9.8967	9.7167	9.1671	10.9738	10.9175	10.5956
ENSMUSG00000104030	5330406M23Rik	1.2393	0.023		5.5449	5.642	5.1848	6.3809	7.0231	6.4779
ENSMUSG00000073725	Lmbrd1	1.2391	0.0045		10.1187	9.8428	9.7612	11.553	10.9088	10.9868
ENSMUSG00000044072	Eml6	1.2385	0.0074		8.1263	8.1319	8.0126	9.7556	8.9984	9.1952
ENSMUSG00000016526	Dyrk3	1.2378	0.0058		8.271	7.8464	8.3529	9.4993	9.5846	9.0681
ENSMUSG00000063652	Slc22a21	1.2377	0.0519		5.5449	6.5289	5.5914	6.7408	7.6889	6.8135
ENSMUSG00000024383	Map3k2	1.2364	0.0066		11.4428	11.4324	10.9006	12.8131	12.6052	12.1084
ENSMUSG00000044083	Efcab8	1.235	0.051		3.7167	4.1086	3.8344	5.2117	4.93	4.5375
ENSMUSG00000065611	Mir23a	1.2347	0.0492		4.7748	4.1086	4.9835	5.417	5.8321	6.0094
ENSMUSG00000056313	Tcim	1.2344	0.1114		5.9287	7.3011	8.3247	8.5035	8.7263	8.0715
ENSMUSG00000021360	Gcnt2	1.234	0.0147		7.0888	6.4582	6.9544	8.0274	8.386	7.6854
ENSMUSG00000053560	Ier2	1.2337	0.0046		8.2615	8.4267	8.2178	9.2128	9.6507	9.7769
ENSMUSG00000107698	Gm44430	1.2316	0.0832		3.8241	3.4682	4.2481	4.3924	5.1611	5.0963
ENSMUSG00000110357	A030001D20Rik	1.2309	0.0694		5.5449	6.0408	5.4422	7.6128	6.7382	6.0988
ENSMUSG00000037465	Klf10	1.2306	0.0027		10.2119	10.4056	10.0622	11.6495	11.5805	11.1639
ENSMUSG00000116908	Gm49599	1.2293	0.0108		7.6376	7.4688	7.0691	8.2496	8.8273	8.7699
ENSMUSG00000042116	Vwa1	1.2286	0.114		3.9241	4.6554	4.7064	4.7371	5.9604	6.0398
ENSMUSG00000115522	Gm49173	1.2275	0.3659		2.5928	3.6819	2.671	5.2117	2.8436	3.2468
ENSMUSG00000048174	Tmem81	1.2272	0.0154		6.3441	6.0016	6.1993	7.5119	7.6206	6.9318
ENSMUSG00000039345	Mettl22	1.2262	0.0042		7.4905	7.4025	7.8835	8.798	8.8001	8.8749
ENSMUSG00000026657	Frmd4a	1.2252	0.0203		8.3223	8.6525	8.8267	9.9908	10.3118	9.161
ENSMUSG00000039318	Rab3gap2	1.2249	0.0086		10.7898	10.6725	10.5326	12.4845	11.5968	11.621
ENSMUSG00000092274	Neat1	1.2246	0.0799		14.0609	14.7639	13.3381	16.1544	15.2241	14.5315
ENSMUSG00000042404	Dennd4b	1.224	0.0092		8.0619	8.4954	8.457	10.0041	9.4534	9.2154
ENSMUSG00000100967	Gm29666	1.224	0.0167		4.8782	5.1971	4.9835	6.0923	6.1659	6.2365
ENSMUSG00000020038	Cry1	1.2239	0.0089		8.7374	8.6993	8.4143	9.3693	10.1355	10.0366
ENSMUSG00000117579	Gm50023	1.2233	0.1049		3.7167	2.9133	3.8344	4.4559	4.5279	4.1482
ENSMUSG00000030747	Dgat2	1.2226	0.0344		6.0664	7.2602	6.2148	7.919	7.7959	7.3753
ENSMUSG00000112822	A130012E19Rik	1.2226	0.0448		5.7495	5.3298	5.6606	6.1888	6.7805	7.3753
ENSMUSG00000106166	Gm43484	1.2221	0.0738		4.4786	3.9527	4.4699	4.8358	5.9104	5.4076
ENSMUSG00000073437	D330041H03Rik	1.2216	0.0254		5.722	5.8552	5.9823	6.6213	7.0231	7.5546
ENSMUSG00000074063	Osgin1	1.2216	0.0331		8.3585	8.5474	7.6874	10.0382	9.2119	8.8959
ENSMUSG00000025937	Lactb2	1.2214	0.0102		9.9658	9.4441	9.7769	11.4843	10.7332	10.6347
ENSMUSG00000046005	D830044D21Rik	1.2194	0.0768		4.4113	4.7997	3.7522	5.318	5.7493	4.9755
ENSMUSG00000045007	Tubg2	1.2177	0.0665		5.5449	6.4289	5.4937	6.9863	7.6128	6.3133
ENSMUSG00000020898	Ctc1	1.2171	0.0022		10.612	10.7269	10.8178	12.1748	12.005	11.6632
ENSMUSG00000102621	Gm37674	1.2166	0.1808		3.0117	2.7334	3.252	3.9387	4.3889	3.0214
ENSMUSG00000106543	Gm43378	1.2158	0.3121		2.8174	3.3482	2.671	2.7726	4.879	3.7668
ENSMUSG00000038387	Rras	1.2153	0.0376		8.623	8.6683	7.6539	9.587	9.9943	8.8959
ENSMUSG00000022021	Diaph3	1.2148	0.0183		10.5741	10.1638	10.2526	12.2396	11.3829	11.0357
ENSMUSG00000106103	Gm43081	1.2144	0.1003		3.7167	3.579	3.7522	4.1833	4.5279	5.4076
ENSMUSG00000104214	Gm36638	1.2138	0.0521		4.1881	4.604	3.9121	4.9723	5.5353	5.3601
ENSMUSG00000014243	Zswim7	1.2137	0.0168		5.9992	6.5562	6.9266	7.6266	7.6284	7.8746
ENSMUSG00000038774	Ascc3	1.2137	0.0039		11.0085	10.5898	10.882	12.3934	11.8233	11.9346
ENSMUSG00000028671	Gale	1.2136	0.0024		8.3405	8.0429	8.3805	9.4553	9.5027	9.4487
ENSMUSG00000027248	Pdia3	1.2134	0.0483		13.2068	12.964	12.5052	15.0002	14.0453	13.336
ENSMUSG00000027944	Hax1	1.2122	0.0224		9.853	9.5499	10.5265	10.9846	10.8831	11.7451
ENSMUSG00000040231	Syngr4	1.212	0.1102		4.4786	3.9527	4.1229	6.0518	4.8261	4.6988
ENSMUSG00000024074	Crim1	1.2111	0.0015		11.7521	11.6092	11.9831	13.0246	12.9696	13.0108
ENSMUSG00000089827	1700023H06Rik	1.211	0.206		3.7167	3.2173	4.7064	5.7565	4.2351	4.5375
ENSMUSG00000026048	Ercc5	1.2104	0.0508		9.4156	8.962	9.0559	11.2814	10.0602	9.6667
ENSMUSG00000028889	Yrdc	1.2093	0.0023		8.9301	8.9388	9.2832	10.3515	10.1191	10.3415
ENSMUSG00000028207	Asph	1.209	0.002		11.7491	11.9881	11.6141	13.0319	13.1543	12.8267
ENSMUSG00000021996	Esd	1.2084	0.0014		11.8427	11.9071	12.1344	13.1299	13.1583	13.2459
ENSMUSG00000022136	Dnajc3	1.2078	0.0258		11.1616	10.9655	10.8416	13.0347	11.6858	11.9117
ENSMUSG00000020173	Cobl	1.207	0.0725		11.4574	11.2767	9.9766	12.6962	12.2338	11.4404
ENSMUSG00000115161	Gm20555	1.2059	0.0252		5.4135	5.877	5.1848	6.3972	6.6344	6.9154
ENSMUSG00000033909	Usp36	1.2053	0.0017		10.088	10.0803	10.0266	11.1811	11.1492	11.5052
ENSMUSG00000002289	Angptl4	1.2042	0.241		2.5928	3.579	3.8344	3.9387	3.641	5.153
ENSMUSG00000085936	2610307P16Rik	1.2019	0.1903		4.4113	3.579	5.7898	5.4486	5.3603	6.2365
ENSMUSG00000026196	Bard1	1.2018	0.0532		9.7597	8.9848	9.019	11.2599	10.3462	9.6956
ENSMUSG00000031513	Leprotl1	1.2018	0.001		10.2119	10.1267	10.2748	11.4438	11.3615	11.4389
ENSMUSG00000109038	Gm45120	1.2018	0.1189		2.8174	2.9133	3.252	3.5306	3.641	4.2558
ENSMUSG00000025278	Flnb	1.2017	0.0018		13.3879	13.46	13.7464	14.7761	14.745	14.7068
ENSMUSG00000023027	Atf1	1.2015	0.0273		9.7765	9.5499	8.8342	11.0509	10.6736	9.9906
ENSMUSG00000024357	Sil1	1.2014	0.003		8.7166	8.774	8.979	10.2919	9.9157	9.8751
ENSMUSG00000100302	Gm29670	1.2014	0.3065		3.8241	2.2879	3.4733	3.2731	4.0629	4.3559
ENSMUSG00000105842	Gm43329	1.2012	0.1151		3.7167	2.9133	3.1272	4.0249	4.3889	3.7668
ENSMUSG00000038217	Tlcd2	1.1994	0.0448		4.6635	4.3148	4.1868	5.806	5.2441	5.2077
ENSMUSG00000028195	Ccn1	1.1993	0.1152		10.9037	10.3314	12.2121	11.6512	12.2959	13.0995
ENSMUSG00000040866	Rsph6a	1.1993	0.3392		3.0117	2.9133	2.2599	2.558	3.5129	4.2558
ENSMUSG00000055188	Rbm3os	1.1992	0.0806		3.336	3.579	3.6651	4.2564	4.2351	4.9755
ENSMUSG00000100209	Gm28793	1.1992	0.2207		2.8174	2.5278	3.252	3.1248	3.3724	4.4496
ENSMUSG00000027171	Prrg4	1.199	0.0127		8.5309	9.0392	8.72	10.2079	10.2566	9.4026
ENSMUSG00000055865	Tafa3	1.1986	0.1745		3.336	4.1086	3.3669	5.318	3.7586	4.5375
ENSMUSG00000025236	Adpgk	1.1975	0.0039		9.1755	9.4368	9.5959	10.34	10.6519	10.8582
ENSMUSG00000070371	Prss36	1.1969	0.0364		5.9761	6.9036	7.2817	8.043	8.0876	7.5858
ENSMUSG00000103741	Gm38241	1.1965	0.1131		3.183	3.0733	3.252	3.5306	4.1515	4.4496
ENSMUSG00000026640	Plxna2	1.1959	0.1072		9.9789	9.9395	9.3957	11.8261	11.3393	9.7004
ENSMUSG00000085037	4933421O10Rik	1.1953	0.0099		6.1095	6.5831	6.4802	7.4431	7.5733	7.714
ENSMUSG00000037965	Zc3h7a	1.1946	0.001		11.0568	10.9636	10.9544	12.181	12.1603	12.2433
ENSMUSG00000103132	Gm37978	1.1945	0.1376		4.1054	4.3774	3.7522	4.2564	5.5019	5.6635
ENSMUSG00000048756	Foxo3	1.194	0.0236		11.5331	11.8203	10.9658	13.2448	12.55	12.1557
ENSMUSG00000029784	Ssmem1	1.1927	0.0838		3.336	3.579	3.9858	4.2564	4.5926	4.9755
ENSMUSG00000103697	Gm38020	1.1926	0.0446		4.2664	3.9527	4.4176	5.2117	5.0269	5.5412
ENSMUSG00000027787	Nmd3	1.1924	0.0029		9.875	9.3339	9.5661	10.7836	10.6866	10.8951
ENSMUSG00000049957	Ccdc137	1.192	0.0061		8.8402	8.9646	9.1431	9.8751	10.1232	10.5853
ENSMUSG00000042742	Bmt2	1.1914	0.0038		10.7229	10.859	10.8045	12.383	11.9239	11.6898
ENSMUSG00000109771	Gm35315	1.1914	0.0097		6.7367	6.8382	7.3391	7.9904	8.2818	8.2316
ENSMUSG00000103703	Gm42568	1.1907	0.1206		3.4743	3.2173	3.8344	4.5167	3.8673	4.9755
ENSMUSG00000041147	Brca2	1.1905	0.0023		10.2533	9.8345	10.2109	11.4325	11.2679	11.1904
ENSMUSG00000031843	Mphosph6	1.19	0.0026		9.2424	8.9466	9.4091	10.3273	10.3626	10.5072
ENSMUSG00000098066	Gm26944	1.1899	0.0486		5.3787	5.051	4.5204	5.6788	6.2486	6.3133
ENSMUSG00000029408	Abcb9	1.1898	0.1661		5.4807	6.079	4.5692	7.0799	6.8351	5.3601
ENSMUSG00000034768	Asb16	1.1898	0.0555		5.6064	5.3918	4.8317	6.2793	6.9259	5.8808
ENSMUSG00000021559	Dapk1	1.189	0.0546		4.4113	5.051	5.6379	6.3972	6.0086	6.0398
ENSMUSG00000024163	Mapk8ip3	1.1884	0.0097		10.6045	11.1629	10.5555	11.7943	12.4241	11.7006
ENSMUSG00000030877	Mfsd13b	1.1879	0.1618		3.183	2.7334	3.4733	4.5167	3.7586	3.4417
ENSMUSG00000074178	Gm10638	1.1879	0.0589		3.6006	3.868	3.5724	4.8827	4.5926	4.3559
ENSMUSG00000028445	Enho	1.1869	0.33		2.5928	2.9133	3.7522	4.8827	3.9684	2.7541
ENSMUSG00000110303	Gm45328	1.1867	0.1108		3.7167	3.2173	4.1229	4.8358	4.1515	4.9112
ENSMUSG00000109428	Gm45698	1.1865	0.1281		3.183	3.0733	3.6651	4.326	3.641	4.6204
ENSMUSG00000029414	Kntc1	1.186	0.0026		11.082	10.5571	10.9704	12.0444	12.0789	12.0693
ENSMUSG00000026193	Fn1	1.1856	0.012		13.09	13.212	13.9329	14.6082	14.3188	14.8802
ENSMUSG00000043333	Rhbdl2	1.1855	0.0129		7.6883	7.5994	8.0815	9.2536	9.1325	8.4849
ENSMUSG00000033581	Igf2bp2	1.1849	0.0108		10.1409	9.7076	9.6871	11.4781	11.0532	10.554
ENSMUSG00000036777	Anln	1.1835	0.0045		12.582	12.0933	12.1857	13.5143	13.7225	13.2156
ENSMUSG00000021211	Akr1c12	1.1828	0.0086		6.5301	6.399	6.5907	7.879	7.4907	7.6164
ENSMUSG00000037363	Letm2	1.1819	0.0546		6.4653	7.0162	6.9907	8.7701	7.6128	7.5118
ENSMUSG00000089809	Rasgef1b	1.1819	0.2869		4.0176	5.4513	3.1272	5.318	5.7774	4.1482
ENSMUSG00000078247	Airn	1.1807	0.179		4.6635	4.3774	4.1229	5.5393	6.3645	4.2558
ENSMUSG00000035399	Oser1	1.1799	0.0053		8.4948	8.561	8.9284	10.1611	9.6883	9.6884
ENSMUSG00000091474	2610021A01Rik	1.1795	0.0023		9.1956	9.0073	9.2666	10.1659	10.3936	10.4783
ENSMUSG00000028126	Pip5k1a	1.1785	0.0097		10.5281	10.2353	10.4698	12.1555	11.2624	11.3792
ENSMUSG00000032449	Slc25a36	1.1776	0.0036		10.8991	11.1241	10.5326	11.9868	12.2008	11.928
ENSMUSG00000073867	AA474408	1.1769	0.1085		5.2303	5.0121	4.9096	7.0494	5.8848	5.3601
ENSMUSG00000060244	Alyref2	1.1749	0.0142		5.9761	6.515	6.4282	7.2947	7.4211	7.714
ENSMUSG00000037321	Tap1	1.1748	0.114		6.6518	6.2053	6.4544	8.6293	7.2609	6.7037
ENSMUSG00000097989	Gm4335	1.1747	0.2851		3.336	3.0733	2.8396	2.9594	3.9684	5.0372
ENSMUSG00000020250	Txnrd1	1.1734	0.0035		13.5458	13.1871	13.3661	14.6299	14.286	14.733
ENSMUSG00000075703	Selenoi	1.173	0.0037		11.3197	11.1948	11.2931	12.2011	12.3329	12.8111
ENSMUSG00000084799	Ino80dos	1.173	0.0152		6.1095	6.3054	5.8699	7.4431	7.2708	6.9318
ENSMUSG00000103467	Gm38245	1.1729	0.0684		3.8241	3.6819	3.9858	4.3924	5.0731	4.9755
ENSMUSG00000105378	Gm42515	1.1714	0.0694		3.6006	4.1086	4.3632	4.7873	4.9793	5.3601
ENSMUSG00000024807	Syvn1	1.171	0.0059		10.5865	10.8672	10.2262	12.0509	11.5785	11.5899
ENSMUSG00000079608	Stard6	1.17	0.0261		5.9761	5.5634	6.0002	7.1196	6.5553	7.2765
ENSMUSG00000098678	Mroh6	1.1698	0.1544		3.0117	4.6554	3.6651	4.575	4.7141	4.7731
ENSMUSG00000086741	Gm15816	1.1688	0.3449		3.6006	3.579	2.8396	5.0566	4.7141	2.7541
ENSMUSG00000027506	Tpd52	1.1686	0.0035		11.5036	11.4227	11.1047	12.803	12.4547	12.3169
ENSMUSG00000106254	Gm42907	1.1682	0.0585		4.6045	4.1806	4.1229	4.9723	5.7206	5.2603
ENSMUSG00000001962	Fam50a	1.1681	0.0065		9.1317	9.31	8.7705	10.5353	10.2238	9.935
ENSMUSG00000055334	Snupn	1.1671	0.0102		7.6153	7.6824	7.8143	8.7258	9.297	8.5655
ENSMUSG00000020130	Tbc1d15	1.1667	0.2458		10.7194	10.6513	8.6761	12.0269	11.7065	9.7587
ENSMUSG00000091313	Fth-ps2	1.1662	0.1942		3.4743	2.5278	3.4733	3.749	3.641	4.3559
ENSMUSG00000010461	Eya4	1.1658	0.5612		3.9241	4.7051	8.3032	5.318	6.0086	9.423
ENSMUSG00000028494	Plin2	1.1655	0.0199		10.7168	11.0923	11.3824	11.8	12.0618	12.8384
ENSMUSG00000113527	Gm48079	1.1654	0.1079		4.1054	3.0733	3.4733	4.326	4.5279	4.3559
ENSMUSG00000085347	Hk1os	1.1652	0.0487		5.6654	5.7407	5.3334	7.0494	6.9384	5.9783
ENSMUSG00000037725	Ckap2	1.1632	0.0048		10.6316	10.1083	10.6002	11.7546	11.7564	11.3446
ENSMUSG00000019889	Ptprk	1.1626	0.0138		11.4533	11.269	12.0917	12.7815	12.4141	13.1221
ENSMUSG00000032652	Crebl2	1.1614	0.0352		8.7271	8.6714	8.2481	10.3102	9.757	8.9688
ENSMUSG00000112742	Gm31793	1.1607	0.0483		5.0205	4.3148	5.1531	5.652	6.0086	6.0398
ENSMUSG00000002845	Tmem39a	1.1599	0.0048		9.1447	9.324	9.4307	10.2217	10.3856	10.8237
ENSMUSG00000106475	Gm43011	1.1598	0.0213		5.722	5.5901	5.3614	6.7909	6.8217	6.3133
ENSMUSG00000007783	Cpt1c	1.1587	0.018		8.6991	8.2704	8.8065	10.2984	9.4024	9.5313
ENSMUSG00000031337	Mtm1	1.1584	0.0093		8.1052	8.2454	7.9495	9.3857	9.5278	8.8013
ENSMUSG00000044037	Als2cl	1.1583	0.0034		10.9746	11.0509	11.2022	12.5766	12.1699	11.9917
ENSMUSG00000035566	Pcdh17	1.1579	0.2842		6.5142	4.0328	6.3466	7.6404	6.2883	6.0094
ENSMUSG00000023940	Sgo1	1.1578	0.0027		10.1435	9.6549	9.9789	11.1939	11.0012	11.0721
ENSMUSG00000042608	Stk40	1.1578	0.002		8.9774	8.771	8.7809	10.1065	9.9928	9.896
ENSMUSG00000104379	Gm37509	1.1573	0.1652		3.4743	3.579	3.1272	3.5306	4.5926	4.7731
ENSMUSG00000027834	Serpini1	1.1571	0.1335		3.336	3.2173	4.3632	4.6311	4.2351	4.7731
ENSMUSG00000030309	Caprin2	1.1562	0.0061		8.6118	8.2868	8.4538	9.6306	9.8934	9.2645
ENSMUSG00000040297	Suco	1.1554	0.0065		11.5102	11.1926	11.193	12.9142	12.2831	12.2043
ENSMUSG00000110869	Gm49628	1.1547	0.0927		3.7167	4.3774	4.1868	4.575	5.2032	5.5831
ENSMUSG00000032557	Uba5	1.1546	0.0046		9.3497	9.5138	9.511	10.3835	10.5145	10.9858
ENSMUSG00000020042	Btbd11	1.1544	0.0945		8.0117	8.6651	7.4078	9.6895	9.5048	8.1848
ENSMUSG00000032308	Ulk3	1.1534	0.008		8.8812	9.314	8.596	9.976	10.3579	9.9126
ENSMUSG00000085795	Zfp703	1.1517	0.0065		9.0005	9.1352	8.6817	10.4167	10.0327	9.7971
ENSMUSG00000044966	Fbxo48	1.1508	0.0258		7.2322	6.9036	6.9544	8.7031	7.9827	7.714
ENSMUSG00000041923	Nol4	1.1505	0.0105		6.3441	6.793	6.8595	7.9358	7.7959	7.666
ENSMUSG00000053574	4930563E22Rik	1.15	0.0573		4.5429	5.162	5.5914	5.9452	6.1006	6.5849
ENSMUSG00000109879	Gm10997	1.149	0.3286		2.5928	2.7334	2.9906	2.558	3.9684	4.2558
ENSMUSG00000054951	9130008F23Rik	1.1487	0.0576		6.6518	6.648	7.5544	7.5917	8.0819	8.7562
ENSMUSG00000107455	Gm43868	1.1479	0.1809		4.0176	3.2173	5.019	5.1362	4.6546	5.3111
ENSMUSG00000026430	Rassf5	1.1473	0.0216		7.8239	7.3874	7.2219	9.0527	8.5127	8.1711
ENSMUSG00000087365	C430049B03Rik	1.147	0.0373		6.2316	6.4582	6.7151	7.0182	7.9147	7.9566
ENSMUSG00000054387	Mdm4	1.1469	0.009		10.9392	10.968	10.6599	12.4937	11.9531	11.5982
ENSMUSG00000117606	Gm5969	1.1468	0.402		3.183	2.5278	3.1272	4.9282	3.7586	2.4258
ENSMUSG00000087502	Gm16091	1.1463	0.1213		3.4743	3.6819	3.9858	4.0249	4.9793	5.0372
ENSMUSG00000104615	Gm43804	1.1463	0.1861		2.8174	2.7334	3.252	3.5306	3.2167	4.3559
ENSMUSG00000036678	Aaas	1.1461	0.0032		10.2994	9.9549	10.5273	11.3981	11.4695	11.38
ENSMUSG00000039234	Sec24d	1.1461	0.0089		10.3029	9.7659	10.1571	11.4191	10.8016	11.4658
ENSMUSG00000025648	Pfkfb4	1.1453	0.1228		6.6949	6.7581	6.7473	8.7031	8.0477	6.6455
ENSMUSG00000036854	Hspb6	1.1452	0.0042		8.4494	8.299	8.1189	9.6185	9.4226	9.2187
ENSMUSG00000039903	Eva1c	1.1447	0.1607		5.2689	5.3298	5.1531	6.7151	7.0919	5.0372
ENSMUSG00000044339	Alkbh2	1.144	0.0059		7.2802	7.5043	7.5544	8.5035	8.4874	8.8146
ENSMUSG00000086154	Gm16196	1.1439	0.1276		3.8241	3.4682	4.1229	5.417	4.46	4.2558
ENSMUSG00000006587	Snai3	1.1436	0.1458		3.4743	3.7779	3.4733	4.3924	5.2032	3.7668
ENSMUSG00000104316	Gm37909	1.1432	0.1598		3.8241	3.9527	3.5724	3.9387	4.879	5.498
ENSMUSG00000077506	Scarna9	1.1429	0.0294		6.4146	7.2518	7.4988	8.1037	8.0303	8.5391
ENSMUSG00000023979	Guca1b	1.1424	0.1143		4.1054	3.579	3.9121	4.4559	4.5279	5.5412
ENSMUSG00000028063	Lmna	1.1421	0.0029		12.8055	12.6663	12.9334	13.7409	14.1834	13.9348
ENSMUSG00000021113	Snapc1	1.142	0.0066		8.4784	8.4156	8.0941	9.6945	9.5298	9.1331
ENSMUSG00000103497	Gm37407	1.1403	0.143		4.1054	3.2173	2.9906	4.1833	4.0629	4.4496
ENSMUSG00000022286	Grhl2	1.1379	0.1702		8.5854	9.1329	7.4475	10.4277	9.5422	8.4169
ENSMUSG00000033863	Klf9	1.1375	0.0921		10.3373	10.7434	9.1228	11.6651	11.4549	10.4797
ENSMUSG00000094708	Gm10359	1.1367	0.2279		3.7167	2.9133	2.671	3.2731	4.3889	3.7668
ENSMUSG00000105217	Gm42873	1.1365	0.1393		3.183	3.2173	3.6651	3.6439	4.5926	4.4496
ENSMUSG00000053716	Dusp7	1.1351	0.0462		9.8906	9.7122	9.2777	11.1315	11.2284	9.8898
ENSMUSG00000108368	Gm45053	1.135	0.067		4.8274	5.0121	4.4699	6.331	5.6614	5.3111
ENSMUSG00000020228	Helb	1.1318	0.0048		9.29	9.0892	9.5141	10.4385	10.6922	10.1698
ENSMUSG00000042599	Kdm7a	1.1314	0.0183		10.1882	10.4326	9.5974	11.354	11.5271	10.7346
ENSMUSG00000107116	Gm43274	1.1304	0.1963		2.8174	3.0733	3.8344	3.5306	4.5926	4.0319
ENSMUSG00000050854	Tmem125	1.1299	0.1245		5.065	5.089	3.7522	5.9003	5.3226	5.5412
ENSMUSG00000020000	Moxd1	1.1296	0.3614		2.5928	2.5278	4.3632	3.749	3.2167	4.6204
ENSMUSG00000051343	Rab11fip5	1.1291	0.0066		12.1989	12.3286	12.4261	13.431	13.0821	13.846
ENSMUSG00000072889	Nfxl1	1.1291	0.0102		10.0205	10.1278	9.2517	10.8944	11.0351	10.8572
ENSMUSG00000105979	Gm43411	1.1285	0.2604		3.0117	3.6819	2.9906	4.1833	4.8261	3.0214
ENSMUSG00000025666	Tmem47	1.1283	0.1063		5.6654	5.4801	5.5676	7.1487	7.0807	5.5831
ENSMUSG00000108478	Gm19514	1.1271	0.3119		3.183	3.6819	3.4733	3.1248	5.0269	5.153
ENSMUSG00000020589	Cyria	1.127	0.3065		6.4486	7.3644	4.7494	7.2947	8.257	6.0094
ENSMUSG00000037822	Smim14	1.127	0.0016		10.6269	10.5664	10.3544	11.6268	11.6586	11.665
ENSMUSG00000042289	Hsd3b7	1.1261	0.0333		4.4113	4.6554	4.8712	5.7565	5.6614	5.5831
ENSMUSG00000052485	Tmem171	1.1245	0.0136		10.7401	10.711	10.9201	11.4719	11.8004	12.4877
ENSMUSG00000037239	Spred3	1.1231	0.0024		9.1576	9.2443	9.0322	10.3794	10.1011	10.3369
ENSMUSG00000022863	Btg3	1.1226	0.0135		6.7504	7.026	6.4282	7.7956	8.0244	7.666
ENSMUSG00000056131	Pgm3	1.1221	0.0147		8.5892	8.3777	8.8467	9.2779	9.8477	10.1208
ENSMUSG00000030271	Ogg1	1.1219	0.0023		8.9058	8.771	8.9812	10.1371	9.9792	9.9146
ENSMUSG00000027424	Mgme1	1.1211	0.0107		8.523	8.1854	8.8663	9.7462	9.3424	9.8919
ENSMUSG00000030089	Slc41a3	1.12	0.0137		7.045	7.1114	7.191	8.5874	8.1801	7.849
ENSMUSG00000053175	Bcl3	1.12	0.0987		3.6006	3.4682	4.1229	5.015	4.314	4.5375
ENSMUSG00000087590	Epb41l4aos	1.1199	0.0923		7.1623	7.7842	8.5173	8.2762	9.0741	9.6715
ENSMUSG00000040187	Arntl2	1.1198	0.0251		6.1718	6.6607	7.2371	7.8557	7.8164	7.7513
ENSMUSG00000026814	Eng	1.119	0.151		4.8782	4.2493	5.5914	6.2074	5.1611	6.5217
ENSMUSG00000046782	Ttc6	1.1181	0.2334		3.183	3.4682	3.3669	5.1362	4.0629	3.2468
ENSMUSG00000026785	Pkn3	1.1172	0.0048		7.8995	7.948	7.7363	8.8609	9.1754	8.8791
ENSMUSG00000090698	Apold1	1.1171	0.0474		5.065	5.0121	4.8317	6.2968	6.1659	5.4535
ENSMUSG00000017677	Wsb1	1.1169	0.0116		13.0452	13.4582	12.7934	14.502	14.3775	13.8133
ENSMUSG00000110127	6430710M23Rik	1.116	0.2092		4.0176	2.7334	3.8344	4.2564	4.7141	3.9054
ENSMUSG00000005667	Mthfd2	1.1155	0.0071		11.2942	10.5906	11.2305	12.2243	12.0205	12.2424
ENSMUSG00000045251	Zfp688	1.1154	0.0049		7.881	8.2157	8.233	9.359	9.2921	9.0232
ENSMUSG00000103343	Gm37052	1.1147	0.0595		4.8782	5.1971	5.1207	5.6246	6.1227	6.6846
ENSMUSG00000113379	Gm46436	1.1143	0.1193		4.2664	4.1086	3.3669	4.3924	5.0731	4.9755
ENSMUSG00000029227	Fip1l1	1.1142	0.0015		11.4027	11.2539	11.4936	12.5271	12.4944	12.4997
ENSMUSG00000037649	H2-DMa	1.1138	0.0318		5.9526	5.8985	6.26	7.1294	6.7093	7.5858
ENSMUSG00000083811	Gm13071	1.1138	0.1118		3.9241	4.4375	3.3669	4.7873	5.0269	4.5375
ENSMUSG00000032839	Trpc1	1.113	0.0203		8.0729	7.8575	7.4797	9.3652	8.6673	8.6118
ENSMUSG00000024410	Rmc1	1.1123	0.0029		8.8874	8.7999	8.9237	10.1575	10.0166	9.7701
ENSMUSG00000037827	Gm5884	1.1116	0.1444		3.0117	3.6819	3.9858	4.1833	4.2351	4.9112
ENSMUSG00000054027	Nt5dc3	1.1112	0.0025		8.8078	8.8778	8.76	10.0421	9.9731	9.761
ENSMUSG00000105293	Gm42843	1.1109	0.1487		3.7167	3.9527	3.3669	3.9387	5.1611	4.6204
ENSMUSG00000033166	Dis3	1.1096	0.0045		10.4797	9.9842	10.5914	11.43	11.5177	11.4616
ENSMUSG00000085287	4833418N02Rik	1.1093	0.0766		4.7748	4.7051	5.4682	5.6788	5.8587	6.6256
ENSMUSG00000023737	1700082M22Rik	1.1083	0.2304		3.7167	2.9133	3.1272	4.4559	3.2167	4.4496
ENSMUSG00000036214	Polr1has	1.1079	0.0287		6.5459	6.3214	6.7891	8.1136	7.4822	7.2637
ENSMUSG00000021213	Akr1c13	1.1077	0.0067		8.9119	8.456	8.6222	10.0537	9.536	9.7028
ENSMUSG00000003868	Ruvbl2	1.1075	0.0031		11.0581	11.0688	11.4078	12.118	12.4714	12.2931
ENSMUSG00000032000	Birc3 ENSMUSG00000032000	1.1071	0.0196		7.7024	7.6637	8.0301	8.4264	9.1674	9.1986
ENSMUSG00000021595	Nsun2	1.1067	0.0021		11.8206	11.6921	11.8871	12.7608	13.0656	12.9207
ENSMUSG00000115568	Tiaf2	1.1064	0.3167		2.8174	3.2173	3.3669	4.1833	4.8261	2.7541
ENSMUSG00000050565	Tor1aip2	1.1056	0.0044		12.4122	12.0754	12.3966	13.6562	13.1593	13.4185
ENSMUSG00000093726	Gm20667	1.1052	0.0101		6.5615	6.515	6.4544	7.4273	7.7398	7.6265
ENSMUSG00000021693	Kif2a	1.1043	0.1101		11.0233	10.8215	9.5751	11.9032	12.1224	10.7159
ENSMUSG00000007617	Homer1	1.103	0.0015		9.5893	9.5363	9.5855	10.7364	10.667	10.6347
ENSMUSG00000041084	Ostc	1.1027	0.0146		10.6806	10.3364	11.161	11.6659	11.6271	12.216
ENSMUSG00000032258	Lca5	1.1026	0.054		8.0619	7.7609	7.3107	9.1422	9.1406	7.9803
ENSMUSG00000002076	Hsf2bp	1.1021	0.2476		3.0117	2.9133	3.7522	4.685	3.2167	4.1482
ENSMUSG00000029415	Sdad1	1.102	0.0019		10.3531	10.1858	10.4199	11.3451	11.3909	11.5548
ENSMUSG00000108268	Gm44187	1.102	0.0259		6.0664	5.6163	5.9083	6.8629	7.2509	6.6256
ENSMUSG00000037259	Dzank1	1.1017	0.1488		4.9272	5.7876	3.9858	6.151	5.8848	5.498
ENSMUSG00000112254	Gm47690	1.1013	0.1375		4.2664	4.604	4.6621	4.685	6.1659	5.7762
ENSMUSG00000115252	Gm48996	1.1012	0.0904		4.8782	5.162	5.019	5.318	6.4717	6.4555
ENSMUSG00000053588	A730061H03Rik	1.1004	0.0806		3.6006	3.3482	3.9121	4.5167	4.3889	4.5375
ENSMUSG00000097587	4930578M01Rik	1.0999	0.1802		3.4743	3.868	4.5204	5.015	4.1515	5.5831
ENSMUSG00000036712	Cyld	1.0998	0.0028		11.0429	10.905	11.2094	12.3552	12.1749	11.9597
ENSMUSG00000054999	Naaladl1	1.0995	0.0644		5.2689	5.051	5.2158	6.2074	6.7666	5.5831
ENSMUSG00000031711	Zfp330	1.0991	0.0027		9.7427	9.7992	10.0938	10.9574	10.8968	11.1147
ENSMUSG00000035840	Lysmd3	1.0985	0.0021		9.8609	9.8539	9.5885	10.922	10.912	10.7759
ENSMUSG00000007812	Zfp655	1.0979	0.0077		10.6036	10.6337	10.3837	12.0939	11.5328	11.3169
ENSMUSG00000042042	Csgalnact2	1.0977	0.0039		9.8703	9.5852	9.439	10.9367	10.6231	10.6285
ENSMUSG00000032712	Resf1	1.0976	0.036		11.7324	11.3167	11.3631	13.3026	12.5482	11.9076
ENSMUSG00000029777	Gars	1.0966	0.0071		12.7288	12.107	12.6321	13.4819	13.4898	13.8117
ENSMUSG00000116165	Pdxp	1.0965	0.0367		5.6362	6.6224	6.1837	6.9755	7.2609	7.4788
ENSMUSG00000038225	Primpol	1.0963	0.0025		8.7814	8.6869	8.8809	9.8249	9.9883	9.841
ENSMUSG00000006301	Tmbim1	1.0961	0.0016		9.612	9.6358	9.756	10.7491	10.7695	10.8005
ENSMUSG00000033762	Recql4	1.096	0.023		8.3131	7.9114	8.4603	9.0372	9.1188	9.894
ENSMUSG00000102300	Gm34106	1.0958	0.4056		3.0117	2.2879	3.5724	4.685	3.2167	2.7541
ENSMUSG00000071796	6820431F20Rik	1.0951	0.0056		7.7234	7.425	7.3875	8.6361	8.5901	8.5497
ENSMUSG00000117546		1.0949	0.1405		3.0117	3.0733	3.1272	3.6439	4.314	3.4417
ENSMUSG00000039474	Wfs1	1.0948	0.0173		10.5351	10.7559	9.998	11.7711	11.7622	11.0601
ENSMUSG00000039740	Alg2	1.0946	0.0214		10.494	10.8983	9.9048	11.7538	11.7088	11.1377
ENSMUSG00000005131	4930550C14Rik	1.0945	0.0558		4.1881	4.2493	4.056	5.3848	5.0269	4.8438
ENSMUSG00000026718	Stam	1.0933	0.0029		10.495	10.5168	10.3666	11.7439	11.6525	11.2879
ENSMUSG00000020458	Rtn4	1.0925	0.0027		12.9333	13.0613	13.2735	14.0842	14.229	14.2568
ENSMUSG00000097402	Gm17399	1.0924	0.2429		3.6006	2.7334	3.9121	4.1063	3.641	4.9112
ENSMUSG00000046269	Usp27x	1.0911	0.0188		7.2989	7.4902	7.8143	8.2361	8.7654	8.9609
ENSMUSG00000040599	Mis12	1.0908	0.0132		10.3259	9.8134	9.9107	11.5719	11.0212	10.7323
ENSMUSG00000090150	Acad11	1.0908	0.0098		8.5777	8.7445	8.0773	9.7382	9.5826	9.3027
ENSMUSG00000100313	Gm28323	1.0908	0.1665		3.183	3.0733	2.9906	3.5306	4.46	3.4417
ENSMUSG00000027379	Bub1	1.0901	0.0053		11.1882	10.6281	11.1329	12.0227	12.2565	11.9682
ENSMUSG00000030510	Cers3	1.0893	0.1132		3.9241	4.4951	3.8344	5.2834	5.2839	4.3559
ENSMUSG00000035279	Ssc5d	1.0893	0.3645		3.183	3.868	2.48	4.8358	3.0422	3.6134
ENSMUSG00000043903	Zfp469	1.0892	0.1741		8.4825	8.5095	8.2556	10.7428	9.3282	8.2898
ENSMUSG00000104315	Gm37906	1.0891	0.0347		5.722	5.5084	5.7898	6.2968	7.0348	6.8654
ENSMUSG00000098730	Mir6407	1.0888	0.3167		2.5928	2.9133	3.252	3.1248	4.7712	3.0214
ENSMUSG00000030718	Ppme1	1.0879	0.006		10.5132	10.8397	10.6329	11.3844	11.9908	11.8983
ENSMUSG00000041341	Atg2b	1.0872	0.0037		10.4059	10.7552	10.5023	11.8269	11.74	11.3896
ENSMUSG00000025558	Dock9	1.0865	0.0324		9.8322	9.969	9.6705	11.2786	11.3059	10.1385
ENSMUSG00000044857	Lemd2	1.0864	0.0027		10.0813	10.3666	10.4365	11.4096	11.5172	11.2485
ENSMUSG00000025981	Coq10b	1.0841	0.0047		9.7306	9.4276	9.9664	10.9388	10.6309	10.8346
ENSMUSG00000057554	Lgals8	1.0838	0.0017		10.7915	10.8862	10.7559	11.8053	12.012	11.8941
ENSMUSG00000029338	Antxr2	1.0836	0.008		9.9451	10.0458	10.4561	11.5937	11.1612	10.975
ENSMUSG00000002799	Jag2	1.0826	0.1936		5.6654	7.3011	5.4158	7.0076	7.9522	6.4779
ENSMUSG00000032666	1700025G04Rik	1.0819	0.0145		9.372	9.0512	9.1769	10.7017	10.3474	9.7679
ENSMUSG00000097979	Gm4691	1.0809	0.1945		3.4743	3.579	2.9906	3.847	4.879	3.6134
ENSMUSG00000078622	Ccdc47	1.0807	0.0034		11.4761	11.5188	11.1344	12.3095	12.4904	12.5979
ENSMUSG00000074656	Eif2s2	1.0805	0.0055		12.2107	11.8089	12.3657	13.0174	13.3216	13.3123
ENSMUSG00000039496	Cdnf	1.0793	0.0331		5.0205	4.7997	4.6621	5.8539	5.7206	5.8468
ENSMUSG00000037851	Iars	1.0779	0.0035		12.5215	12.1511	12.1888	13.4384	13.4837	13.2113
ENSMUSG00000028042	Zbtb7b	1.0776	0.0034		10.596	10.5714	10.3777	11.7812	11.3369	11.6838
ENSMUSG00000022360	Atad2	1.0768	0.0164		12.2969	11.7312	12.1959	13.6751	12.9904	12.8333
ENSMUSG00000085658	Gm15704	1.0764	0.1434		3.336	2.9133	3.5724	4.3924	3.7586	3.9054
ENSMUSG00000036057	Ptpn23	1.0763	0.0277		10.8491	10.9089	10.3404	12.278	11.9247	11.1587
ENSMUSG00000064565	Gm24145	1.0762	0.3189		2.3266	3.4682	3.5724	3.4076	4.46	3.4417
ENSMUSG00000045302	Preb	1.075	0.0095		10.2936	10.2119	9.6816	11.3762	11.2181	10.8204
ENSMUSG00000040364	Sec1	1.0735	0.2217		3.0117	4.3774	4.056	4.6311	5.2839	4.0319
ENSMUSG00000103085	Gm38120	1.0725	0.3228		4.7202	4.4951	2.8396	4.7371	5.4678	4.0319
ENSMUSG00000039908	Slc26a11	1.0722	0.0096		7.562	7.7784	7.5051	8.7031	8.9311	8.3758
ENSMUSG00000031958	Ldhd	1.0721	0.1546		4.4786	5.3298	3.7522	5.8302	5.1611	5.2603
ENSMUSG00000026807	Ak8	1.0715	0.1439		3.4743	3.579	2.9906	4.5167	3.9684	3.7668
ENSMUSG00000035356	Nfkbiz	1.0715	0.0149		9.6635	10.522	10.5691	11.2808	11.2467	11.4874
ENSMUSG00000083209	Gm11969	1.071	0.1557		3.183	3.4682	3.252	3.5306	4.5279	4.2558
ENSMUSG00000002105	Slc39a13	1.0706	0.0055		10.1756	10.1037	10.3829	11.4994	10.9534	11.4517
ENSMUSG00000102018	Iqank1	1.0702	0.2264		5.2689	5.6922	4.8712	7.5119	5.3226	5.914
ENSMUSG00000089407	Gm24878	1.0697	0.2578		2.8174	2.7334	2.671	2.9594	3.0422	4.2558
ENSMUSG00000034438	Gbp8	1.0696	0.3017		5.9992	5.3612	4.6164	7.4509	6.4717	4.7731
ENSMUSG00000035270	Impg2	1.0695	0.1903		4.5429	4.7532	3.6651	5.8539	5.3226	4.3559
ENSMUSG00000026188	Tmem169	1.0689	0.1676		4.1054	4.0328	3.3669	5.0566	4.9793	3.9054
ENSMUSG00000116010	Gm36026	1.068	0.16		3.183	3.7779	3.6651	4.575	3.7586	4.8438
ENSMUSG00000039840	Epg5	1.0675	0.0055		9.5507	9.4146	9.4826	10.8879	10.4934	10.2679
ENSMUSG00000033948	Zswim5	1.0674	0.1986		3.0117	3.0733	3.1272	3.4076	3.5129	4.6204
ENSMUSG00000110469	Gm10358	1.0674	0.1531		4.1054	3.2173	3.252	3.9387	4.46	4.5375
ENSMUSG00000103804	Gm37062	1.0666	0.0987		4.1881	4.6554	3.8344	5.1745	5.4678	4.6988
ENSMUSG00000112096	A430103D13Rik	1.0651	0.1778		5.065	5.4219	4.4176	5.8539	6.8217	5.0372
ENSMUSG00000041556	Fbxo2	1.0647	0.2228		5.065	5.5901	4.7494	6.5934	6.8484	4.7731
ENSMUSG00000031367	Ap1s2	1.0642	0.0081		8.8337	8.6651	8.69	9.7446	10.1503	9.4684
ENSMUSG00000015653	Steap2	1.064	0.0185		12.2465	11.957	12.4278	12.7786	13.302	13.7549
ENSMUSG00000031937	Vstm5	1.0639	0.0546		6.2119	6.8604	5.7267	7.0999	7.6437	7.1286
ENSMUSG00000108954	Gm44901	1.0635	0.0188		6.2701	6.0408	5.8503	7.039	6.9631	7.2507
ENSMUSG00000064542	Gm22980	1.0629	0.3761		2.3266	3.3482	4.1868	3.5306	3.641	4.7731
ENSMUSG00000102919	Gm37726	1.0626	0.2828		3.6006	4.1086	4.3068	3.749	5.6309	5.6239
ENSMUSG00000112944	Gm48885	1.0617	0.0457		4.6635	4.4375	4.3632	5.3518	5.5997	5.3111
ENSMUSG00000039851	4932438H23Rik	1.0611	0.1488		4.1054	4.1806	3.4733	5.3848	4.5926	4.2558
ENSMUSG00000031284	Pak3	1.0609	0.0221		8.924	9.0343	9.7704	10.709	10.1584	10.072
ENSMUSG00000026153	Fam135a	1.0595	0.005		10.541	10.2594	10.0844	11.5634	11.3891	11.1254
ENSMUSG00000046962	Zbtb21	1.059	0.0066		10.1134	10.4363	10.3726	11.7215	11.0689	11.3408
ENSMUSG00000115810	Gm49066	1.059	0.0651		4.4786	4.604	4.947	5.4486	5.4329	6.1274
ENSMUSG00000022241	Tars	1.0589	0.0101		11.7112	11.2566	11.872	12.3756	12.7116	12.9483
ENSMUSG00000030732	Chrdl2	1.0587	0.0818		4.3407	5.3298	4.3632	5.652	5.4678	5.7762
ENSMUSG00000023947	Nfkbie	1.0579	0.046		7.0671	6.6732	7.9026	8.0787	8.247	8.5603
ENSMUSG00000040128	Pnrc1	1.0559	0.0073		11.7402	12.0892	11.4344	12.9907	12.8658	12.6132
ENSMUSG00000063659	Zbtb18	1.0559	0.0025		11.0394	10.9215	11.0823	12.2562	11.9073	12.0767
ENSMUSG00000032637	Atxn2l	1.0555	0.0106		11.9253	11.7824	11.4157	13.16	12.7429	12.4325
ENSMUSG00000033653	Vps8	1.0552	0.0037		9.0973	9.1666	9.285	10.4773	10.145	10.1047
ENSMUSG00000031015	Swap70	1.0549	0.0025		10.2057	10.2129	10.3794	11.4096	11.445	11.1351
ENSMUSG00000104641	Gm43290	1.0547	0.0637		4.4786	4.0328	3.9858	5.015	5.1611	4.9755
ENSMUSG00000025500	Lmntd2	1.0545	0.0299		7.5775	8.331	7.6539	9.0578	9.199	8.4053
ENSMUSG00000066232	Ipo7	1.0541	0.0051		13.3283	13.3031	13.1113	14.3452	14.5784	14.0218
ENSMUSG00000030556	Lrrc28	1.0536	0.0384		8.7026	8.5576	8.6135	10.4017	9.3495	9.2319
ENSMUSG00000030064	Frmd4b	1.0532	0.0284		9.574	9.5431	8.6982	10.2353	10.7224	9.9867
ENSMUSG00000015880	Ncapg	1.0528	0.0053		11.1756	10.6078	11.0865	12.1387	11.9581	11.9597
ENSMUSG00000037573	Tob1	1.0522	0.2381		10.6554	10.5955	8.9744	11.9825	11.5369	9.817
ENSMUSG00000058748	Zfp958	1.0522	0.0044		8.8111	8.6366	8.5752	9.8398	9.8209	9.4961
ENSMUSG00000019734	Tmc4	1.0517	0.1056		5.8798	7.5795	6.1197	7.3625	7.7611	7.5651
ENSMUSG00000038515	Grtp1	1.0506	0.0494		5.2303	5.265	5.0537	6.5792	6.1006	5.7396
ENSMUSG00000041992	Rapgef5	1.05	0.1319		5.4135	5.5634	5.8304	7.3625	6.7238	5.6239
ENSMUSG00000032413	Rasa2	1.0499	0.0126		9.3631	9.3398	8.9447	10.2853	10.6309	9.8603
ENSMUSG00000092593	Gm20492	1.0497	0.1659		3.7167	3.0733	4.1229	4.5167	4.0629	4.7731
ENSMUSG00000023908	Pkmyt1	1.0496	0.006		9.6904	9.1908	9.744	10.6534	10.4547	10.6898
ENSMUSG00000037991	Rmi2	1.0489	0.0222		7.1102	6.6607	7.3035	7.8017	8.3301	8.0862
ENSMUSG00000086554	9530034E10Rik	1.0489	0.4332		3.183	2.9133	2.9906	5.0566	3.8673	2.4258
ENSMUSG00000023919	Cenpq	1.0486	0.0066		9.462	8.9773	9.6091	10.3463	10.3695	10.5072
ENSMUSG00000033705	Stard9	1.048	0.0205		6.4818	6.4869	6.6141	7.3459	7.9273	7.3989
ENSMUSG00000054622	D730045B01Rik	1.0474	0.1841		4.2664	3.3482	4.7494	4.7371	4.7712	5.5412
ENSMUSG00000023087	Noct	1.047	0.0065		10.4879	10.0815	10.3965	11.1556	11.2962	11.679
ENSMUSG00000042029	Ncapg2	1.0459	0.0386		11.3339	10.6607	10.8589	12.6212	12.0227	11.3888
ENSMUSG00000088689	Scarna17	1.0452	0.0726		5.8291	6.0601	6.3325	6.7661	6.7666	7.8746
ENSMUSG00000078671	Chd2	1.044	0.0233		11.5903	11.5253	11.2041	13.1375	12.1313	12.2268
ENSMUSG00000026356	Dars	1.0436	0.0027		11.3288	11.1022	11.4528	12.3143	12.3156	12.4109
ENSMUSG00000111088	9430081H08Rik	1.0436	0.0649		4.6635	4.7997	4.947	5.9452	5.2839	6.0988
ENSMUSG00000011751	Sptbn4	1.0433	0.1138		3.336	3.4682	3.8344	4.1063	4.314	4.6988
ENSMUSG00000006732	Mettl1	1.043	0.034		8.4282	8.1985	9.1208	9.4974	9.3471	10.1226
ENSMUSG00000082762	Gm12366	1.0426	0.1255		3.4743	4.1806	3.9858	4.326	5.1611	4.7731
ENSMUSG00000072612	Gm10382	1.0415	0.2123		3.9241	3.0733	4.1229	5.1745	4.2351	4.0319
ENSMUSG00000024038	Ndufv3	1.0414	0.0026		10.2581	10.4582	10.2061	11.2665	11.5025	11.3021
ENSMUSG00000024989	Cep55	1.0411	0.0088		11.0254	10.6062	10.8674	11.616	12.2693	11.7623
ENSMUSG00000026679	Enkur	1.0408	0.0278		7.045	6.1879	6.3605	7.4969	7.5652	7.5546
ENSMUSG00000108207	1810059H22Rik	1.0408	0.1594		4.1881	5.5634	4.1229	5.8773	5.5679	5.0963
ENSMUSG00000027035	Cers6	1.0399	0.1888		6.289	5.833	7.289	7.7071	6.5553	8.3456
ENSMUSG00000097643	A130051J06Rik	1.039	0.1172		5.1081	4.4951	5.1531	6.5792	5.5019	5.4535
ENSMUSG00000102246	9430037O13Rik	1.0385	0.0765		4.0176	3.6819	3.9121	4.7873	4.5279	4.8438
ENSMUSG00000104662	Gm43267	1.0372	0.2433		3.336	2.7334	3.252	3.2731	4.5279	3.6134
ENSMUSG00000031960	Aars	1.0359	0.006		13.0995	12.5717	13.0833	14.0366	13.8661	13.9912
ENSMUSG00000071181	3830408C21Rik	1.0358	0.0831		4.8274	5.833	5.0537	6.314	6.5224	5.7396
ENSMUSG00000074802	Gas2l3	1.0355	0.0139		11.3087	10.6313	10.9985	12.4108	11.9227	11.7457
ENSMUSG00000084145	Gm12263	1.0355	0.0626		4.2664	4.2493	4.4699	4.9723	5.5019	5.2603
ENSMUSG00000048787	Dcun1d3	1.0338	0.0035		8.8905	8.8778	8.8292	10.0841	9.851	9.761
ENSMUSG00000030528	Blm	1.0331	0.0108		9.9775	9.3806	9.6899	10.9643	10.8084	10.3687
ENSMUSG00000113571	Gm48137	1.033	0.0944		4.0176	3.6819	3.5724	4.5167	4.3889	4.8438
ENSMUSG00000114169	Gm47075	1.0329	0.1297		3.8241	3.7779	3.4733	4.1063	4.46	5.0372
ENSMUSG00000077345	Snord70	1.0328	0.1244		4.3407	3.6819	4.1868	4.4559	5.0731	5.3601
ENSMUSG00000065049	Gm24041	1.0326	0.2937		2.8174	2.7334	3.7522	3.1248	4.3889	3.9054
ENSMUSG00000062510	Nsl1	1.0325	0.0134		8.9716	8.4633	9.0278	10.1383	9.5381	9.8919
ENSMUSG00000109420	Gm44702	1.032	0.1521		3.7167	3.2173	3.9858	4.6311	4.7141	3.9054
ENSMUSG00000073728	Tmem51os1	1.0312	0.2447		4.1054	3.868	2.9906	4.6311	4.879	3.6134
ENSMUSG00000005803	Sqor	1.031	0.0136		10.0663	10.1704	9.6649	11.0764	11.3416	10.5789
ENSMUSG00000048264	Dip2c	1.031	0.0096		10.1318	10.2708	9.7872	11.4637	10.9914	10.8378
ENSMUSG00000113188	Gm35638	1.0287	0.0992		3.6006	4.3148	4.2481	4.7371	5.2032	4.8438
ENSMUSG00000034303	Ccdc15	1.0286	0.0582		7.6003	7.0063	7.0434	8.7887	8.1853	7.5858
ENSMUSG00000022090	Pdlim2	1.0275	0.2232		5.1081	6.4289	5.5188	6.8746	7.5326	5.498
ENSMUSG00000043251	Exoc3l	1.0275	0.2587		4.8782	4.4951	5.4158	7.0076	5.7774	4.6988
ENSMUSG00000022791	Tnk2	1.0264	0.0029		11.0163	11.0503	11.2003	11.958	12.1166	12.2946
ENSMUSG00000087351	Gm11464	1.0259	0.1904		3.7167	3.0733	4.1868	4.685	3.9684	4.6988
ENSMUSG00000035941	Ibtk	1.0256	0.0021		10.4422	10.3185	10.2003	11.3388	11.3766	11.3431
ENSMUSG00000005802	Slc30a4	1.0255	0.0022		11.0711	11.0026	10.8723	12.037	12.1121	11.9029
ENSMUSG00000040466	Blvrb	1.0245	0.0253		7.5698	7.5928	7.2446	8.9267	8.3443	8.1007
ENSMUSG00000054277	Arfgap3	1.0243	0.0041		9.2923	9.5567	9.135	10.2522	10.4094	10.4159
ENSMUSG00000085112	A530072M11Rik	1.0235	0.0952		3.9241	3.6819	4.3068	5.097	4.7141	4.6204
ENSMUSG00000068742	Cry2	1.0228	0.0097		9.4432	9.5618	9.0365	10.3608	10.6462	10.0939
ENSMUSG00000028613	Lrp8	1.0225	0.0763		10.8867	10.3235	10.2003	12.2192	11.6242	10.6533
ENSMUSG00000005958	Ephb3	1.0217	0.4986		4.8274	7.1478	3.9121	5.9672	7.8433	4.6204
ENSMUSG00000117694	Snhg4	1.0209	0.1633		3.336	3.3482	4.3632	4.326	4.3889	4.7731
ENSMUSG00000040010	Slc7a5	1.0208	0.0071		11.8708	11.2175	11.4528	12.4403	12.6075	12.586
ENSMUSG00000085102	1700010K24Rik	1.0206	0.2333		2.8174	3.0733	3.5724	3.2731	4.0629	4.3559
ENSMUSG00000035047	Kri1	1.0197	0.0083		9.2278	9.0608	9.2004	9.8384	10.2863	10.4643
ENSMUSG00000114936	Gm47061	1.0189	0.0977		3.6006	4.4375	4.2481	4.9282	4.879	5.0963
ENSMUSG00000039633	Lonrf1	1.0188	0.0338		8.1211	8.2157	7.4011	9.2265	8.9713	8.4793
ENSMUSG00000001588	Acap1	1.0183	0.0102		10.2364	10.1935	9.8391	11.0354	11.4893	10.8083
ENSMUSG00000022263	Trio	1.0178	0.006		12.3288	12.4076	12.4234	13.785	13.2182	13.247
ENSMUSG00000025762	Larp1b	1.0168	0.0185		9.6957	8.9047	9.399	10.3598	10.0501	10.6619
ENSMUSG00000074580	4931440P22Rik	1.0168	0.1019		3.8241	4.7051	4.4176	5.3518	4.879	5.4076
ENSMUSG00000017146	Brca1	1.0166	0.0165		10.8975	10.3676	10.9979	12.1795	11.7179	11.4489
ENSMUSG00000056121	Fez2	1.0159	0.0059		10.5152	10.2657	10.4722	11.2312	11.3363	11.7577
ENSMUSG00000115210	Gm49308	1.0154	0.2458		4.1881	4.4951	3.8344	4.0249	5.6913	5.5831
ENSMUSG00000031478	Nek3	1.0152	0.0377		6.5923	6.5963	6.4802	7.8848	7.7182	6.9639
ENSMUSG00000026096	Osgepl1	1.0146	0.0078		7.6811	7.5795	7.768	8.798	8.4874	8.7924
ENSMUSG00000006638	Abhd1	1.0129	0.0366		5.9044	5.5634	5.5914	6.3479	6.9384	6.6846
ENSMUSG00000027829	Ccnl1	1.0128	0.0033		10.4316	10.5168	10.6408	11.7375	11.3604	11.56
ENSMUSG00000085492	Trmt61b	1.0128	0.0268		7.2224	7.5252	7.6195	8.0737	8.5211	8.9042
ENSMUSG00000088412	Gm24241	1.0127	0.4719		2.8174	2.5278	2.2599	2.3058	2.8436	4.4496
ENSMUSG00000021759	Plpp1	1.0125	0.0168		8.2519	8.2621	8.7731	9.1422	9.475	9.7882
ENSMUSG00000019326	Aoc3	1.0118	0.2724		3.336	3.0733	3.9121	4.3924	3.3724	4.9755
ENSMUSG00000035671	Zswim4	1.0116	0.005		9.8193	9.8635	10.0802	11.1388	11.0167	10.6631
ENSMUSG00000040713	Creg1	1.0104	0.0163		7.6595	7.2008	7.6368	8.767	8.267	8.4569
ENSMUSG00000022911	Arl13b	1.0103	0.0042		9.574	9.4874	9.6365	10.8359	10.4721	10.4332
ENSMUSG00000015542	Nat9	1.01	0.0157		7.8303	8.22	8.3176	9.3632	9.275	8.7424
ENSMUSG00000032252	Glce	1.0097	0.0026		10.1383	10.2448	9.98	11.0694	11.2162	11.128
ENSMUSG00000006050	Sra1	1.0095	0.0057		9.8859	9.7688	10.3138	10.91	11.0263	11.0976
ENSMUSG00000109206	Gm45137	1.0092	0.0228		7.0888	6.9247	6.6024	7.5917	7.9083	8.1292
ENSMUSG00000028145	Them4	1.0088	0.0352		6.7367	6.7463	6.6024	7.5341	7.3665	8.2382
ENSMUSG00000030521	Mphosph10	1.0081	0.0103		9.8371	9.7076	10.1857	10.7114	10.8024	11.2855
ENSMUSG00000109642	Gm45289	1.0079	0.2306		3.7167	3.579	3.8344	3.6439	5.1178	4.9755
[truncated: 12,674 more rows]

## Sheet: Limma-Trend
Row-names	Symbol	logFC	adj-P-Val	data	N1	N2	N3	H1	H2	H3
ENSMUSG00000025347	Mettl7b	7.5079	0.0001		4.4786	4.6554	5.8892	12.888	12.0183	12.6407
ENSMUSG00000030790	Adm	7.4864	0.0003		2.5928	5.3612	2.9906	11.6664	11.3245	10.413
ENSMUSG00000023045	Soat2	7.4019	0		2.3266	2.5278	2.2599	9.878	9.5585	9.8835
ENSMUSG00000024912	Fosl1	7.3876	0.0001		4.3407	3.868	5.6606	12.0393	12.2471	11.7457
ENSMUSG00000029334	Prkg2	7.168	0.0001		4.0176	3.868	5.3614	12.3942	11.3334	11.0234
ENSMUSG00000104554	Gm4610	6.442	0.0002		4.3407	4.6554	3.252	10.9554	11.1785	9.4402
ENSMUSG00000116657	Gm49774	6.3204	0.0002		2.5928	4.3148	3.6651	10.3209	10.0313	9.1817
ENSMUSG00000009687	Fxyd5	6.2598	0.0001		3.183	2.5278	3.9858	9.3339	10.1039	9.0383
ENSMUSG00000055333	Fat2	6.1846	0.0006		3.7167	5.8552	5.2758	11.6016	11.9696	9.8301
ENSMUSG00000013483	Card14	6.1391	0.0005		2.8174	3.2173	2.671	9.9417	9.7249	7.4565
ENSMUSG00000028125	Abca4	6.1235	0.0001		4.0176	5.2978	4.5692	11.0263	11.1752	10.0535
ENSMUSG00000022262	Dnah5	6.0812	0.0001		2.3266	2.5278	2.2599	9.1779	8.5043	7.6758
ENSMUSG00000029727	Cyp3a13	6.0745	0.0001		2.3266	2.9133	2.2599	8.0888	9.3704	8.2642
ENSMUSG00000020256	Aldh1l2	5.885	0		8.5739	8.6557	7.5604	14.3635	14.0964	13.985
ENSMUSG00000029134	Plb1	5.8411	0.0002		2.3266	2.7334	2.2599	8.8342	8.6823	7.3267
ENSMUSG00000029378	Areg	5.7589	0.0005		3.183	2.9133	2.48	9.6306	9.0798	7.1427
ENSMUSG00000024388	Myo7b	5.6412	0.0013		2.3266	3.9527	3.1272	9.8487	9.4707	7.0107
ENSMUSG00000024421	Lama3	5.4966	0.0006		4.8782	6.3529	4.056	11.2324	10.7607	9.7837
ENSMUSG00000021950	Anxa8	5.4753	0.0012		3.183	3.868	3.252	10.2555	9.3448	7.1286
ENSMUSG00000085183	Wincr1	5.4562	0.0001		4.4786	4.972	5.4682	11.155	10.0062	10.1262
ENSMUSG00000037411	Serpine1	5.4435	0.0003		9.3132	9.5051	11.4881	15.5295	15.6797	15.4279
ENSMUSG00000005611	Irag1	5.367	0.0001		2.8174	3.0733	2.671	8.9897	7.8499	7.823
ENSMUSG00000021831	Ero1a	5.3189	0.0001		10.3918	10.9267	9.9412	16.1336	15.9405	15.1422
ENSMUSG00000005413	Hmox1	5.2842	0		8.8305	8.7445	8.859	14.4342	13.8388	14.0137
ENSMUSG00000026981	Il1rn	5.2748	0.0002		3.183	4.3148	4.3632	9.9376	8.9027	8.8451
ENSMUSG00000074796	Slc4a11	5.238	0.0001		7.3627	7.7726	8.1311	13.5332	13.1958	12.2514
ENSMUSG00000037613	Tnfrsf23	5.2235	0.0001		7.078	6.7463	6.6024	12.3516	12.497	11.2485
ENSMUSG00000050914	Ankrd37	5.2148	0.0009		5.343	7.9376	5.5434	11.9425	11.3846	11.1412
ENSMUSG00000063767	S100a7a	5.1927	0.0004		2.8174	4.4951	3.1272	9.2333	8.844	7.9406
ENSMUSG00000038550	Ciart	5.1725	0.0001		5.3064	6.1704	5.9458	10.8012	10.7483	11.3903
ENSMUSG00000035273	Hpse	5.1684	0.0004		4.7748	5.6163	3.6651	9.9152	10.3403	9.3058
ENSMUSG00000114554	5430425K12Rik	5.0962	0.0006		2.8174	2.7334	2.2599	8.8783	7.6361	6.5849
ENSMUSG00000038742	Angptl6	5.0353	0		4.8782	5.0121	4.947	10.1777	9.7176	10.0479
ENSMUSG00000025408	Ddit3	5.0324	0		7.4151	7.5662	7.6539	12.7877	12.3171	12.6276
ENSMUSG00000030187	Klra2	5.0093	0.001		2.5928	2.2879	2.671	8.3195	8.2818	5.9783
ENSMUSG00000053141	Ptprt	5	0.0008		3.8241	3.3482	2.2599	9.2713	7.8096	7.3512
ENSMUSG00000029380	Cxcl1	4.995	0.0005		4.4786	5.089	5.9458	11.0158	10.3249	9.1576
ENSMUSG00000039518	Cdsn	4.9808	0.0002		3.183	3.2173	2.8396	8.9654	7.6206	7.5961
ENSMUSG00000085912	Trp53cor1	4.9019	0.0008		3.0117	3.3482	2.8396	9.3083	7.6815	6.9154
ENSMUSG00000074489	Bglap3	4.8788	0.0003		2.5928	2.5278	2.671	7.6197	8.2867	6.5217
ENSMUSG00000032715	Trib3	4.7981	0.0002		8.0998	6.6094	7.9074	12.5468	11.945	12.5191
ENSMUSG00000027737	Slc7a11	4.7721	0.0013		8.1829	6.3529	7.9262	13.3464	11.0618	12.3703
ENSMUSG00000107768	Gm44275	4.7348	0.0002		5.2303	5.265	5.1207	10.6752	9.9913	9.1541
ENSMUSG00000032548	Slco2a1	4.6808	0.0008		4.4786	5.6673	3.9121	9.9988	9.714	8.3877
ENSMUSG00000018906	P4ha2	4.6477	0.0035		5.9526	9.6196	7.1595	12.0722	12.2618	12.3408
ENSMUSG00000047963	Stbd1	4.5713	0		6.5459	6.5426	6.0526	10.73	11.013	11.112
ENSMUSG00000034799	Unc13a	4.5601	0.0004		6.3076	7.2767	5.6149	11.5804	10.8904	10.4086
ENSMUSG00000029468	P2rx7	4.5577	0.0002		3.0117	2.5278	2.48	7.7583	7.329	6.6054
ENSMUSG00000005045	Chd5	4.5385	0.0037		6.4317	6.7815	6.6711	12.4479	11.9874	9.0644
ENSMUSG00000026069	Il1rl1	4.5287	0.0177		3.9241	5.3298	8.5017	11.2072	8.8736	11.2607
ENSMUSG00000031538	Plat	4.5146	0.0004		7.7509	8.3468	8.9072	12.1396	13.8013	12.6078
ENSMUSG00000109372	Gm19410	4.5024	0.0005		2.3266	2.2879	2.2599	7.5044	5.7206	7.1567
ENSMUSG00000026166	Ccl20	4.4989	0.0005		3.0117	3.0733	4.5692	7.5704	8.4442	8.1363
ENSMUSG00000074577	Ripor3	4.4966	0.0006		5.1907	5.877	5.5188	10.792	10.4828	8.8013
ENSMUSG00000020911	Krt19	4.4938	0.001		8.5739	10.2667	7.731	13.2893	13.7554	13.0082
ENSMUSG00000026639	Lamb3	4.4819	0.0001		7.4407	7.9272	7.2521	12.4826	12.1384	11.4446
ENSMUSG00000039742	Fam71f1	4.4681	0.0002		5.8798	6.2892	7.1515	10.9899	10.4806	11.2542
ENSMUSG00000024521	Pmaip1	4.3911	0.0003		9.173	8.6237	9.7347	14.4512	13.0802	13.1734
ENSMUSG00000042759	Apobr	4.3777	0.0007		2.5928	2.2879	2.671	7.7646	5.7774	7.1427
ENSMUSG00000054855	Rnd1	4.3422	0.0002		6.5301	6.0408	7.3461	11.2759	11.2448	10.4231
ENSMUSG00000026628	Atf3	4.3189	0.0017		7.4823	7.6383	8.0773	13.5549	10.7233	11.8763
ENSMUSG00000003541	Ier3	4.3183	0.0002		9.4724	10.4455	10.3888	15.0433	14.2283	13.99
ENSMUSG00000107458	Gm44040	4.2533	0.0005		3.183	2.5278	3.252	8.1572	6.8616	6.7037
ENSMUSG00000038295	Atg9b	4.2449	0.0014		4.8274	6.7344	5.9641	11.0413	9.9973	9.222
ENSMUSG00000046056	Sbsn	4.2068	0.0011		4.0176	4.8447	4.056	9.1446	9.1433	7.2507
ENSMUSG00000022218	Tgm1	4.204	0.0023		3.183	4.5506	2.9906	8.263	8.6176	6.4555
ENSMUSG00000087028	Gm13387	4.2006	0.0005		5.1081	4.4951	4.3068	9.2082	9.3956	7.9079
ENSMUSG00000026959	Grin1	4.1932	0.0006		3.4743	3.3482	3.9858	8.7918	7.3849	7.2112
ENSMUSG00000108179	Gm44274	4.1912	0.0004		2.3266	2.9133	2.8396	7.5193	6.9508	6.183
ENSMUSG00000043421	Hilpda	4.1817	0.0001		7.5227	7.6699	8.3975	12.3453	11.8897	11.9003
ENSMUSG00000047528	Flacc1	4.1717	0.0002		3.336	3.0733	3.7522	7.5267	7.9522	7.1977
ENSMUSG00000050359	Sprr1a	4.1469	0.0008		5.5132	6.399	7.1595	10.9192	9.6469	10.9462
ENSMUSG00000064080	Fbln2	4.1171	0.0069		4.0176	5.2315	7.6929	9.3148	9.714	10.2646
ENSMUSG00000003545	Fosb	4.1126	0.0005		4.2664	4.8884	4.1229	9.1203	8.8001	7.695
ENSMUSG00000086845	Gm13010	4.1091	0.0007		2.8174	4.0328	3.1272	8.1086	7.4736	6.7226
ENSMUSG00000036480	Prss56	4.1075	0.0077		2.3266	2.2879	2.671	8.729	5.5679	5.3111
ENSMUSG00000047104	Pbp2	4.082	0.0006		4.1881	4.2493	4.5692	9.3776	8.3205	7.5546
ENSMUSG00000043388	Tmem130	4.0751	0.0007		2.3266	2.7334	3.3669	6.4292	6.4717	7.7513
ENSMUSG00000027824	Vmn2r1	4.0265	0.0026		2.5928	3.3482	2.2599	7.5044	7.465	5.3111
ENSMUSG00000024486	Hbegf	4.0114	0.0001		9.2592	9.1864	9.7962	13.3261	13.7545	13.1953
ENSMUSG00000037106	Fer1l6	3.993	0.0168		3.183	4.4951	3.3669	9.2036	8.6673	5.153
ENSMUSG00000010051	Hyal1	3.9778	0.001		5.576	6.1704	5.2758	10.761	9.3888	8.8058
ENSMUSG00000096965	3300005D01Rik	3.9739	0.0008		3.183	2.2879	2.8396	6.6488	7.605	5.9783
ENSMUSG00000006567	Atp7b	3.9733	0.0006		4.6045	5.7876	4.056	9.1228	8.4573	8.788
ENSMUSG00000045349	Sh2d5	3.9439	0.0011		3.8241	4.7997	4.3068	8.2894	9.1964	7.2765
ENSMUSG00000078566	Bnip3	3.9057	0.0004		10.2866	11.6287	10.0266	14.6278	14.4046	14.6268
ENSMUSG00000084807	Gm13073	3.9047	0.0004		2.5928	2.2879	3.1272	7.0286	6.0086	6.6846
ENSMUSG00000031844	Hsd17b2	3.8994	0.001		2.3266	2.9133	2.2599	6.8032	7.0348	5.3601
ENSMUSG00000040435	Ppp1r15a	3.864	0.0001		9.6026	9.6954	9.6105	13.8884	13.0207	13.5912
ENSMUSG00000048078	Tenm4	3.8626	0.0009		4.8782	5.3918	5.3334	10.1635	8.719	8.3086
ENSMUSG00000015766	Eps8	3.8577	0.0027		3.6006	3.868	3.9858	8.9434	7.7959	6.2881
ENSMUSG00000051435	Fhad1	3.8453	0.0012		4.1054	5.162	3.3669	8.511	8.2369	7.4222
ENSMUSG00000004655	Aqp1	3.8297	0.0042		3.7167	3.6819	3.6651	8.328	8.4486	5.7762
ENSMUSG00000086681	Gm16178	3.8294	0.0003		2.8174	2.2879	2.671	6.9646	6.1445	6.1555
ENSMUSG00000004540	Psg17	3.8274	0.0004		2.5928	2.7334	2.2599	6.6889	6.6033	5.7762
ENSMUSG00000006143	Upk3bl	3.818	0.0022		3.336	4.8447	3.9121	8.2451	8.598	6.7037
ENSMUSG00000026068	Il18rap	3.7956	0.0016		2.5928	3.4682	4.3068	7.0182	6.6798	8.0567
ENSMUSG00000086526	Gm12762	3.7884	0.0011		3.7167	4.2493	3.9858	8.8783	7.3385	7.1
ENSMUSG00000053581	Zfand2a	3.7837	0.0005		9.4474	9.2939	9.6719	14.2969	12.9214	12.5459
ENSMUSG00000097636	Mirt1	3.7816	0.001		4.6045	4.3774	5.8304	8.0169	9.3211	8.819
ENSMUSG00000003955	Fam162a	3.7748	0.0001		9.2853	10.3432	9.7625	13.6684	13.5091	13.5379
ENSMUSG00000028943	Espn	3.7706	0.0044		3.183	5.1259	2.9906	7.474	8.4917	6.6455
ENSMUSG00000052837	Junb	3.7703	0.0005		9.0456	9.658	10.831	13.614	13.6193	13.6121
ENSMUSG00000116380	Gm39556	3.7429	0.0003		3.336	4.2493	4.1229	7.5775	7.674	7.6854
ENSMUSG00000017204	Gsdma	3.7362	0.0094		3.336	3.4682	2.671	8.0169	7.8232	4.8438
ENSMUSG00000035105	Egln3	3.7356	0.0036		9.7881	11.1529	8.3941	14.0531	13.6158	12.8729
ENSMUSG00000020044	Timp3	3.7245	0.0003		3.183	3.579	2.9906	7.0494	6.5874	7.2892
ENSMUSG00000027456	Sdcbp2	3.7075	0.0005		3.336	3.579	3.1272	6.4911	6.9133	7.7604
ENSMUSG00000111343	Gm47175	3.7057	0.0004		3.4743	3.868	3.3669	7.379	7.7821	6.6652
ENSMUSG00000040828	Catsperd	3.6974	0.0045		2.3266	3.2173	2.48	7.8732	5.2032	6.0398
ENSMUSG00000032487	Ptgs2	3.6941	0.0006		6.6518	6.4726	7.052	11.3664	10.0997	9.7926
ENSMUSG00000026271	Gpr35	3.6874	0.0026		3.183	3.2173	2.8396	8.1619	5.9847	6.1555
ENSMUSG00000111341	Gm47111	3.6673	0.0005		3.4743	4.7997	4.056	7.9469	7.789	7.5961
ENSMUSG00000025383	Il23a	3.6662	0.0004		2.5928	2.9133	2.671	5.806	6.4544	6.9154
ENSMUSG00000023120	Ldc1	3.6646	0.0014		3.183	2.5278	2.8396	7.1773	6.9133	5.4535
ENSMUSG00000018774	Cd68	3.6549	0.0004		5.722	6.501	6.3466	10.4227	9.9471	9.1645
ENSMUSG00000057098	Ebf1	3.6505	0.0003		4.3407	4.5506	4.2481	8.4499	8.1958	7.4451
ENSMUSG00000042622	Maff	3.6463	0.0001		8.4948	9.0147	9.2139	12.8236	12.5993	12.2392
ENSMUSG00000027435	Cd93	3.6458	0.0004		4.0176	5.265	4.3068	8.3616	8.2165	7.9486
ENSMUSG00000115852	Gm52969	3.6451	0.001		3.183	3.0733	2.8396	7.4509	5.7493	6.831
ENSMUSG00000078606	Gvin2	3.6434	0.0078		2.8174	2.5278	4.7912	5.9672	6.8351	8.2642
ENSMUSG00000037580	Gch1	3.6159	0.0002		4.2664	4.1806	4.4176	7.9133	8.1427	7.6563
ENSMUSG00000051335	Gfod1	3.6157	0.0008		5.7495	6.1525	6.0526	9.8473	10.3684	8.5863
ENSMUSG00000021765	Fst	3.6144	0.005		3.4743	3.2173	5.5676	8.5803	7.2205	7.3018
ENSMUSG00000052955	Cpvl	3.6101	0.0035		3.183	3.3482	3.252	7.7457	7.5076	5.3601
ENSMUSG00000067219	Nipal1	3.6086	0.0004		3.336	2.9133	3.5724	7.3375	6.9005	6.4096
ENSMUSG00000037716	Ccdc33	3.6083	0.0015		2.3266	2.2879	3.1272	6.331	6.9753	5.2603
ENSMUSG00000026872	Zeb2	3.6059	0.0005		3.4743	4.7997	4.4699	7.879	8.0763	7.6063
ENSMUSG00000116289	Gm31342	3.6007	0.0006		2.8174	2.2879	2.48	6.7535	5.5353	6.0988
ENSMUSG00000097282	5031415H12Rik	3.5905	0.0005		3.7167	2.7334	3.9121	6.9646	7.1894	6.9796
ENSMUSG00000090066	1110002E22Rik	3.5834	0.0047		4.9746	5.6673	7.052	10.5991	8.4659	9.379
ENSMUSG00000022705	Drd3	3.5801	0.0005		2.5928	2.2879	3.1272	6.314	6.5874	5.8468
ENSMUSG00000101549	Gm29630	3.5791	0.0023		4.5429	4.0328	5.4937	8.0987	7.4211	9.2869
ENSMUSG00000037447	Arid5a	3.5766	0.0004		4.8782	4.9308	5.4937	8.643	8.1154	9.2741
ENSMUSG00000001227	Sema6b	3.5641	0.0052		4.1054	5.3918	3.4733	8.4104	8.6673	6.5849
ENSMUSG00000015533	Itga2	3.5623	0.0002		6.4818	6.1163	5.8503	9.5655	10.2453	9.3244
ENSMUSG00000019960	Dusp6	3.5534	0		10.4145	10.4582	10.1471	13.7986	13.9486	13.9328
ENSMUSG00000035697	Arhgap45	3.5461	0.0037		4.6045	5.0121	5.3614	9.7222	8.7513	7.1427
ENSMUSG00000035775	Krt20	3.5019	0.0718		6.7229	5.7407	3.252	10.5554	9.8192	5.8468
ENSMUSG00000068874	Selenbp1	3.4896	0.0011		8.5506	9.326	7.6874	12.2077	12.5387	11.2863
ENSMUSG00000022707	Gbe1	3.4874	0		9.1447	8.6173	8.9167	12.4768	12.3476	12.3165
ENSMUSG00000017724	Etv4	3.4738	0.0008		8.3314	6.5831	7.8444	10.8778	11.1665	11.136
ENSMUSG00000041120	Nbl1	3.4645	0.0051		4.3407	5.3918	4.6164	9.7556	7.8164	7.1705
ENSMUSG00000085105	Gm12758	3.4402	0.0018		3.8241	5.1259	3.8344	8.4144	7.7109	6.9796
ENSMUSG00000008461	Fut1	3.4283	0.0012		2.8174	2.9133	4.2481	7.1294	6.6344	6.4999
ENSMUSG00000046318	Ccbe1	3.426	0.0045		8.0564	7.6762	10.2813	12.5301	11.9434	11.8182
ENSMUSG00000034765	Dusp5	3.4092	0.0002		7.9359	8.0621	8.2924	10.872	12.0478	11.5982
ENSMUSG00000006494	Pdk1	3.4075	0.0018		10.0745	11.7495	9.6451	14.1992	13.8185	13.6737
ENSMUSG00000030717	Nupr1	3.4019	0.0002		4.8782	5.3612	5.4682	8.2451	8.9027	8.7654
ENSMUSG00000092216	Gm19345	3.3976	0.0029		2.3266	3.0733	2.2599	6.8861	6.1227	4.8438
ENSMUSG00000026414	Tnnt2	3.3866	0.001		3.9241	4.3774	4.947	7.196	7.7109	8.5014
ENSMUSG00000022769	Sdf2l1	3.3768	0.0003		8.2615	8.3777	9.0387	12.4951	11.6042	11.7089
ENSMUSG00000013846	St3gal1	3.3689	0.0048		7.3082	7.619	6.8595	11.7624	11.0517	9.0792
ENSMUSG00000096035	Odaph	3.3573	0.0055		3.4743	3.7779	4.6164	6.3809	6.7944	8.7654
ENSMUSG00000097098	9330111N05Rik	3.3549	0.0054		2.8174	3.579	2.8396	7.9302	5.6309	5.7396
ENSMUSG00000117571	4933433H22Rik	3.3357	0.0009		2.3266	2.5278	2.8396	6.6351	5.5679	5.498
ENSMUSG00000040511	Pvr	3.3272	0.0001		9.7167	9.8289	10.0212	13.5951	13.227	12.7262
ENSMUSG00000040405	Havcr1	3.3067	0.0005		2.8174	3.0733	2.9906	5.9229	6.1006	6.7778
ENSMUSG00000071042	Rasgrp3	3.3022	0.0087		3.4743	3.579	6.1032	7.2417	8.267	7.5546
ENSMUSG00000003032	Klf4	3.2866	0.0006		8.4068	9.075	8.0345	12.5003	11.5919	11.2839
ENSMUSG00000026674	Ddr2	3.2838	0.0011		3.183	2.9133	2.9906	7.1196	5.6913	6.1274
ENSMUSG00000038729	Pakap	3.2834	0.0002		3.8241	4.0328	4.2481	7.2685	7.3849	7.3018
ENSMUSG00000030103	Bhlhe40	3.2823	0.0001		10.8153	11.0509	10.836	14.6574	14.0502	13.8413
ENSMUSG00000034394	Lif	3.2758	0.0005		8.5854	8.69	9.1491	12.8662	11.5088	11.8768
ENSMUSG00000021751	Acox2	3.2756	0.0011		6.9174	6.1345	7.6021	10.8005	9.6957	9.9847
ENSMUSG00000020399	Havcr2	3.2659	0.0018		3.0117	2.7334	2.48	6.6213	6.3645	5.0372
ENSMUSG00000057069	Ero1b	3.2619	0.0003		7.8559	8.1136	7.6253	11.7644	10.9725	10.6434
ENSMUSG00000034855	Cxcl10	3.2606	0.0576		4.6045	4.5506	6.1197	11.2737	6.9005	6.8822
ENSMUSG00000032238	Rora	3.2516	0.001		5.2303	6.5831	5.5188	9.4318	9.116	8.5391
ENSMUSG00000038412	Higd1a	3.2444	0.0001		10.0745	10.5964	10.6163	13.6159	13.5941	13.8103
ENSMUSG00000048373	Fgfbp1	3.2411	0.0008		7.0226	5.8552	7.1754	10.3252	9.9014	9.55
ENSMUSG00000021125	Arg2	3.2329	0.0006		2.3266	2.7334	2.9906	5.9003	6.3077	5.5412
ENSMUSG00000040380	Cbln3	3.218	0.0023		3.336	4.5506	2.671	7.0076	6.7944	6.4096
ENSMUSG00000118257	9630014M24Rik	3.218	0.0006		2.8174	3.4682	3.4733	6.1317	6.8484	6.4327
ENSMUSG00000036499	Eea1	3.2169	0.0014		10.9385	10.5478	10.4921	15.0022	13.5021	13.1247
ENSMUSG00000117485	Gm19696	3.2136	0.0014		3.9241	4.1086	3.4733	7.8379	7.0464	6.2625
ENSMUSG00000027977	Ndst3	3.2091	0.0007		4.7202	4.0328	4.9835	8.3365	7.6284	7.3989
ENSMUSG00000045868	Gvin1	3.2045	0.0062		3.0117	3.4682	4.9096	6.151	6.8484	8.0037
ENSMUSG00000019997	Ccn2	3.1921	0.0008		10.0921	9.7659	10.7975	13.1758	12.8705	14.1855
ENSMUSG00000004105	Angptl2	3.1915	0.0014		5.6064	5.8552	6.3325	9.3817	9.8158	8.1711
ENSMUSG00000001021	S100a3	3.1881	0.0014		3.7167	4.2493	5.019	7.0698	7.3572	8.1222
ENSMUSG00000026864	Hspa5	3.1825	0.0002		13.5118	13.489	14.0343	17.0786	16.6845	16.8196
ENSMUSG00000032589	Bsn	3.1376	0.0057		2.8174	3.9527	3.1272	7.7136	6.0553	5.5412
ENSMUSG00000059434	Gckr	3.1295	0.0047		2.3266	2.2879	2.48	6.5358	5.6913	4.2558
ENSMUSG00000039126	Prune2	3.1274	0.0035		4.5429	5.051	5.1207	8.798	8.5211	6.7778
ENSMUSG00000020108	Ddit4	3.126	0.001		10.2449	11.5924	10.4625	14.476	13.776	13.4257
ENSMUSG00000042745	Id1	3.1221	0.0001		7.3082	7.1921	7.4861	10.4395	10.6614	10.2517
ENSMUSG00000026536	Ifi211	3.1214	0.0011		2.3266	2.7334	3.3669	6.0101	5.4678	6.3133
ENSMUSG00000028970	Abcb1b	3.1186	0.0013		3.336	3.3482	3.9121	7.4509	6.3458	6.1555
ENSMUSG00000039236	Isg20	3.1166	0.001		5.2303	6.2395	5.3614	8.9709	9.146	8.0641
ENSMUSG00000105402	Gm3716	3.1155	0.0003		6.0881	6.6857	6.5548	10.0356	9.2725	9.3671
ENSMUSG00000036533	Cdc42ep3	3.1149	0.0018		5.5132	6.2562	7.0173	8.6998	9.4985	9.933
ENSMUSG00000039238	Zfp750	3.1075	0.072		2.3266	2.2879	2.2599	8.4224	4.5279	3.2468
ENSMUSG00000063522	Ly6m	3.1053	0.0006		2.5928	2.5278	2.671	5.652	6.1445	5.3111
ENSMUSG00000046186	Cd109	3.0895	0.0017		4.8782	6.1163	6.6933	9.0806	8.8374	9.0383
ENSMUSG00000116114	Gm35853	3.0812	0.0262		5.0205	6.4289	3.6651	9.2288	8.6292	6.4999
ENSMUSG00000026726	Cubn	3.08	0.001		4.7202	5.3918	6.23	8.5624	8.3583	8.6616
ENSMUSG00000003279	Dlgap1	3.0707	0.0048		2.3266	2.9133	2.8396	6.8393	5.8321	4.6204
ENSMUSG00000027994	Mcub	3.069	0.0009		3.4743	4.6554	3.7522	6.8032	7.2905	6.9952
ENSMUSG00000058420	Syt17	3.0667	0.0047		2.3266	3.868	3.9858	5.652	6.7805	6.9479
ENSMUSG00000028121	Bcar3	3.0516	0.0017		9.026	8.7084	7.9262	12.1229	12.0344	10.6582
ENSMUSG00000027956	Tmem144	3.0462	0.0012		8.778	7.5795	9.3193	11.7255	11.4324	11.6577
ENSMUSG00000056758	Hmga2	3.0368	0.0005		10.0731	9.3939	9.5404	13.3728	12.552	12.193
ENSMUSG00000030093	Wnt7a	3.0309	0.0003		9.5836	9.802	10.1896	13.4388	12.7655	12.4637
ENSMUSG00000026479	Lamc2	3.0169	0.0123		9.501	10.8439	8.0815	13.2525	12.7302	11.4942
ENSMUSG00000031027	Stk33	3.0124	0.0013		2.3266	3.0733	3.3669	5.9888	5.5019	6.3133
ENSMUSG00000041168	Lonp1	3.0038	0		11.5489	11.829	11.7552	14.775	14.6865	14.6829
ENSMUSG00000102419	Gm36940	2.9813	0.0018		3.9241	4.4951	3.5724	6.331	7.6889	6.9154
ENSMUSG00000024846	Cst6	2.9646	0.0008		2.8174	2.7334	3.4733	6.1317	6.1227	5.6635
ENSMUSG00000054568	Usp17la	2.9613	0.0056		2.5928	2.2879	2.2599	5.097	6.5715	4.3559
ENSMUSG00000067203	H2-K2	2.9499	0.0023		3.336	3.4682	4.3068	7.4273	6.1006	6.4327
ENSMUSG00000026107	Nabp1	2.9398	0.0002		8.8874	8.7206	9.03	12.2559	11.3516	11.8497
ENSMUSG00000070498	Tmem132b	2.9366	0.043		2.5928	3.4682	2.2599	7.9413	5.2839	3.9054
ENSMUSG00000032374	Plod2	2.9343	0.0007		9.3983	10.3953	9.6691	13.182	12.9431	12.1404
ENSMUSG00000024210	Ip6k3	2.9313	0.0041		2.3266	3.7779	2.8396	6.17	6.4717	5.0963
ENSMUSG00000032515	Csrnp1	2.9267	0.0009		7.3082	7.5526	7.9587	11.3325	10.2863	9.9808
ENSMUSG00000032359	Ctsh	2.919	0.0012		7.9478	8.1273	6.9266	10.9136	10.8701	9.9749
ENSMUSG00000095457	Gvin-ps5	2.9164	0.006		2.5928	2.5278	4.2481	6.1121	5.3603	6.6455
ENSMUSG00000019850	Tnfaip3	2.9146	0.0005		8.7579	8.2285	9.1491	12.0108	11.0767	11.7917
ENSMUSG00000097081	Gm10425	2.9127	0.0016		5.15	4.4375	6.0002	8.4104	7.9273	7.9881
ENSMUSG00000001627	Ifrd1	2.9086	0.0003		9.8177	9.5068	10.3094	13.2392	12.5735	12.5469
ENSMUSG00000037033	Clca3b	2.9062	0.001		2.8174	3.2173	3.5724	6.2793	6.3829	5.6635
ENSMUSG00000046169	Adamts6	2.8971	0.023		3.183	3.579	5.2461	5.8302	6.4011	8.4682
ENSMUSG00000023067	Cdkn1a	2.8931	0.0057		10.7504	10.7923	9.6774	14.3249	13.4915	12.0831
ENSMUSG00000045679	Pqlc3	2.8917	0.001		6.9884	6.2562	6.3325	9.9948	9.4921	8.7654
ENSMUSG00000027071	P2rx3	2.8804	0.0122		2.8174	2.2879	3.5724	7.0899	5.6913	4.5375
ENSMUSG00000006462	A530013C23Rik	2.8708	0.0032		2.8174	4.2493	3.7522	6.997	6.5874	5.8468
ENSMUSG00000023951	Vegfa	2.8701	0.0003		10.3764	11.0906	10.0408	13.3729	13.3677	13.3774
ENSMUSG00000005087	Cd44	2.8636	0.0001		9.2302	9.0392	9.2023	12.3858	11.9673	11.7095
ENSMUSG00000032261	Sh3bgrl2	2.8525	0.0004		9.7948	9.6892	9.4175	12.8308	12.8098	11.8182
ENSMUSG00000097651	4930461G14Rik	2.8433	0.0016		8.5739	8.513	7.5051	11.5371	11.301	10.2838
ENSMUSG00000062296	Trank1	2.8419	0.0004		7.9117	7.5321	7.2219	10.8028	10.4678	9.9208
ENSMUSG00000006411	Nectin4	2.8416	0.0257		2.3266	3.7779	2.8396	7.6674	4.8261	4.9755
ENSMUSG00000020184	Mdm2	2.8392	0.0007		11.2395	10.8236	11.0418	14.5773	13.8855	13.1598
ENSMUSG00000024190	Dusp1	2.8371	0.0016		7.6811	8.4812	8.9947	11.922	10.8545	10.892
ENSMUSG00000006445	Epha2	2.8342	0.0001		11.168	11.1456	11.4921	14.0787	14.1386	14.0911
ENSMUSG00000050335	Lgals3	2.8307	0.0003		11.5518	11.8406	10.8521	14.3182	14.3964	14.0218
ENSMUSG00000059668	Krt4	2.8299	0.0411		4.1054	4.2493	3.5724	8.8783	6.6946	4.8438
ENSMUSG00000048388	Fam171b	2.8279	0.0008		3.9241	3.579	3.6651	7.0596	6.4368	6.1555
ENSMUSG00000031026	Trim66	2.8274	0.0011		2.5928	2.2879	2.48	5.7565	4.8261	5.2603
ENSMUSG00000004371	Il11	2.826	0.0009		4.2664	4.3148	4.3632	7.3205	6.5057	7.5961
ENSMUSG00000037509	Arhgef4	2.823	0.0021		4.6045	4.972	3.8344	7.9302	7.1361	6.8135
ENSMUSG00000026822	Lcn2	2.8228	0.0002		8.2945	8.3816	7.6707	10.9805	10.7981	11.0367
ENSMUSG00000031770	Herpud1	2.8205	0.0002		10.2057	9.9639	10.2442	13.1151	12.4886	13.2718
ENSMUSG00000000628	Hk2	2.8196	0.0006		11.6055	11.828	12.5521	15.3356	14.4502	14.6585
ENSMUSG00000066278	Vps37b	2.8173	0.0004		9.5624	9.7949	9.3317	12.9708	12.3269	11.8433
ENSMUSG00000049985	Ankrd55	2.8161	0.0043		3.0117	2.9133	4.4176	6.4449	5.6614	6.6846
ENSMUSG00000025791	Pgm1	2.8066	0.0003		10.2437	11.0521	10.0938	13.3252	13.3454	13.1389
ENSMUSG00000010751	Tnfrsf22	2.8058	0.0013		7.8995	7.5113	7.1354	10.6458	10.8135	9.5043
ENSMUSG00000037868	Egr2	2.8024	0.0114		3.7167	3.7779	2.671	7.5988	5.4329	5.5412
ENSMUSG00000028645	Slc2a1	2.796	0.0006		12.5904	12.971	11.7513	15.4419	15.3164	14.9423
ENSMUSG00000085055	Gm15958	2.7956	0.0061		2.5928	2.5278	4.2481	6.4758	5.4329	5.8468
ENSMUSG00000003865	Gys1	2.7894	0.0007		10.2497	11.0424	9.6885	13.3868	13.0856	12.8763
ENSMUSG00000085282	Gm15663	2.7892	0.0019		4.4786	4.604	5.2158	8.3153	6.9874	7.3633
ENSMUSG00000050395	Tnfsf15	2.7782	0.0024		2.5928	3.4682	3.7522	6.5061	6.1006	5.5412
ENSMUSG00000097715	Gpr137b-ps	2.7754	0.0002		8.9598	8.7681	8.8242	11.8429	11.8571	11.1785
ENSMUSG00000105826	Gm42141	2.7717	0.0013		2.3266	2.5278	2.9906	5.318	5.805	5.0372
ENSMUSG00000062151	Unc13c	2.746	0.0078		6.577	6.5289	5.3614	9.6271	9.4024	7.6758
ENSMUSG00000073771	Btbd19	2.741	0.001		7.9239	7.8409	7.8143	11.4482	10.145	10.2088
ENSMUSG00000038917	3930402G23Rik	2.7409	0.0011		2.3266	2.7334	2.48	5.417	5.5019	4.8438
ENSMUSG00000017390	Aldoc	2.7388	0.001		6.817	7.5458	6.3743	9.8234	9.9014	9.2286
ENSMUSG00000072623	Zfp9	2.7362	0.0005		5.7495	5.642	6.388	8.8162	8.4529	8.7191
ENSMUSG00000048285	Frmd6	2.7356	0.0001		9.2424	9.3977	9.7949	12.1962	12.3966	12.0489
ENSMUSG00000055994	Nod2	2.7346	0.0041		2.3266	3.0733	2.2599	5.248	6.0782	4.5375
ENSMUSG00000008136	Fhl2	2.7284	0.001		7.8933	7.9167	9.1789	10.9512	11.0781	11.1447
ENSMUSG00000110697	Gm31718	2.7283	0.0157		3.183	3.2173	4.4699	7.7393	6.0553	5.2603
ENSMUSG00000055632	Hmcn2	2.7263	0.0113		5.4135	5.8552	6.136	10.0601	7.9584	7.5651
ENSMUSG00000113159	Gm48771	2.7251	0.0013		2.5928	3.2173	2.2599	5.417	5.5679	5.2603
ENSMUSG00000058966	Tlcd3b	2.7231	0.0334		2.5928	2.2879	2.48	6.8153	5.4678	3.2468
ENSMUSG00000045027	Prss22	2.7216	0.0104		2.3266	4.7051	2.8396	6.314	5.9104	5.8119
ENSMUSG00000086631	Gm12784	2.7202	0.0023		4.0176	4.4375	3.7522	7.312	7.0464	6.0094
ENSMUSG00000056271	Lman1l	2.7197	0.0026		2.3266	2.9133	2.48	5.5097	5.8321	4.5375
ENSMUSG00000036944	Tmem71	2.7125	0.0004		5.8546	5.265	5.4937	8.446	8.2113	8.0934
ENSMUSG00000013089	Etv5	2.7059	0.0008		8.7847	7.4175	7.9356	10.6509	10.8595	10.745
ENSMUSG00000063229	Ldha	2.7009	0.0012		13.198	14.3307	12.9254	16.2974	16.2426	16.0167
ENSMUSG00000030641	Ddias	2.7008	0.0018		9.3631	8.5677	9.075	12.5609	11.5182	11.0291
ENSMUSG00000022952	Runx1	2.6979	0.0008		8.7545	9.5669	9.9845	12.5329	11.9427	11.924
ENSMUSG00000021196	Pfkp	2.6912	0.0002		11.5832	11.6064	10.9486	14.2822	13.8613	14.0682
ENSMUSG00000021306	Gpr137b	2.6814	0.0009		10.1435	10.0944	9.5631	13.1315	12.8401	11.8737
ENSMUSG00000024427	Spry4	2.681	0.0021		6.6518	5.7876	5.3049	8.378	9.1133	8.2961
ENSMUSG00000034457	Eda2r	2.6713	0.0045		9.3316	8.2412	8.4891	12.2348	11.4994	10.3415
ENSMUSG00000005148	Klf5	2.67	0.0006		9.7289	9.8106	9.2386	12.7419	12.3878	11.6583
ENSMUSG00000055926	Gm14137	2.6696	0.004		4.3407	6.1704	5.2158	7.9957	8.1958	7.544
ENSMUSG00000101191	Gm28809	2.6692	0.0003		5.803	5.5084	5.9083	8.4064	8.2818	8.5391
ENSMUSG00000024268	Celf4	2.6644	0.0016		5.6064	4.6554	5.8503	7.8078	8.4398	7.8576
ENSMUSG00000030584	Dpf1	2.663	0.0004		6.1513	5.9407	6.3325	8.8696	9.127	8.4169
ENSMUSG00000041827	Oasl1	2.6626	0.0186		5.803	6.2225	4.2481	9.0398	8.3905	6.831
ENSMUSG00000032057	Hoatz	2.6618	0.0147		2.5928	2.5278	2.48	6.6074	5.0731	3.9054
ENSMUSG00000085569	Gm12602	2.6615	0.0005		5.15	5.7407	5.705	8.1714	8.4442	7.9645
ENSMUSG00000020889	Nr1d1	2.6573	0.1068		7.6302	8.0086	6.0526	11.923	10.626	7.1144
ENSMUSG00000020892	Aloxe3	2.6541	0.0366		3.183	2.5278	2.671	7.4817	4.7141	4.1482
ENSMUSG00000026880	Stom	2.6524	0.0005		8.8624	9.2979	8.6734	11.6987	12.05	11.0423
ENSMUSG00000007379	Dennd2c	2.6493	0.0008		6.3798	6.2728	6.1032	9.3999	9.0397	8.2642
ENSMUSG00000102893	Gm37855	2.6477	0.0238		2.5928	2.9133	3.3669	7.1294	4.0629	5.6239
ENSMUSG00000022051	Bnip3l	2.6461	0.0006		11.3145	12.253	11.2535	14.3047	14.4903	13.9645
ENSMUSG00000021281	Tnfaip2	2.6457	0.0003		11.0049	10.8734	10.8459	13.8946	13.76	13.0067
ENSMUSG00000025969	Nrp2	2.6378	0.0012		7.7509	8.774	8.0475	10.9629	11.2858	10.237
ENSMUSG00000021118	Plek2	2.6266	0.0038		5.0205	4.7532	5.4422	7.8963	8.4398	6.7596
ENSMUSG00000004558	Ndrg2	2.6219	0.0145		2.3266	3.0733	3.7522	5.8539	4.46	6.7037
ENSMUSG00000082247	Gm16074	2.6212	0.0051		2.5928	3.9527	2.8396	5.0566	6.1227	6.0696
ENSMUSG00000043822	Adamtsl5	2.6193	0.0013		5.722	6.8713	5.8102	8.496	8.9864	8.779
ENSMUSG00000027015	Cybrd1	2.6186	0.0019		3.0117	2.9133	2.2599	5.806	5.0269	5.2077
ENSMUSG00000025650	Col7a1	2.6177	0.026		4.8782	6.0978	8.2024	8.9013	9.0656	9.0644
ENSMUSG00000020901	Pik3r5	2.6155	0.0042		3.4743	3.4682	3.9858	6.5504	6.9133	5.3111
ENSMUSG00000044471	Lncpint	2.6141	0.0001		7.8239	7.5252	7.5724	10.322	10.3626	10.0793
ENSMUSG00000027313	Chac1	2.6128	0.0008		8.3762	7.5729	8.8091	10.722	10.7843	11.0904
ENSMUSG00000109695	Gm31166	2.6094	0.005		4.0176	4.604	2.9906	7.0076	6.4544	5.9783
ENSMUSG00000067212	H2-T23	2.6007	0.003		4.5429	6.2225	5.2461	7.9957	8.0303	7.7876
ENSMUSG00000079173	Zan	2.6004	0.0104		5.4475	4.972	4.5692	8.5147	8.0126	6.2625
ENSMUSG00000005089	Slc1a2	2.5942	0.0134		2.5928	2.5278	3.3669	6.728	4.3889	5.153
ENSMUSG00000005125	Ndrg1	2.5925	0.0031		12.8906	13.5146	11.8916	15.8746	15.3329	14.8668
ENSMUSG00000043811	Rtn4r	2.5904	0.0041		3.0117	2.9133	3.3669	6.5211	5.6309	4.9112
ENSMUSG00000047428	Dlk2	2.5801	0.0087		2.5928	2.2879	2.2599	5.8302	5.2839	3.7668
ENSMUSG00000029410	Ppef2	2.5781	0.0022		2.3266	2.7334	2.9906	5.8302	4.9793	4.9755
ENSMUSG00000108472	Gm45212	2.572	0.0019		3.336	3.6819	4.3068	5.9452	6.7093	6.3861
ENSMUSG00000080115	Eef1akmt3	2.5689	0.003		2.5928	3.0733	3.252	4.8358	5.7493	6.0398
ENSMUSG00000070313	Pate14	2.5669	0.001		2.8174	2.7334	2.9906	5.6788	5.2032	5.3601
ENSMUSG00000046711	Hmga1	2.5651	0.0005		10.2901	10.3481	9.6221	12.76	12.9767	12.2189
ENSMUSG00000024395	Lims2	2.5635	0.007		3.7167	3.579	3.7522	7.4352	5.805	5.498
ENSMUSG00000050931	Sgms2	2.5541	0.0002		10.5894	10.3618	9.9178	13.0665	12.8136	12.6512
ENSMUSG00000040829	Zmynd15	2.5522	0.0125		3.183	3.2173	3.1272	7.1098	4.7141	5.3601
ENSMUSG00000040675	Mthfd1l ENSMUSG00000040675	2.5435	0.0001		10.0718	9.9106	10.1073	12.6611	12.359	12.7003
ENSMUSG00000084989	Crocc2	2.5407	0.0319		4.1054	4.7997	5.1848	8.8696	7.1789	5.6635
ENSMUSG00000081137	BC022960	2.5392	0.0039		3.336	4.5506	4.8317	6.6889	7.1252	6.5217
ENSMUSG00000028755	Cda	2.5376	0.0093		5.8546	6.8713	5.6149	9.0705	9.3933	7.4899
ENSMUSG00000018920	Cxcl16	2.5352	0.002		7.0995	7.425	6.9996	10.5867	9.3377	9.2053
ENSMUSG00000036067	Slc2a6	2.5352	0.0011		5.4475	5.265	4.947	8.263	7.7255	7.2765
ENSMUSG00000010067	Rassf1	2.5343	0.0003		9.0372	9.2837	9.2832	12.2399	11.6415	11.3254
ENSMUSG00000036611	Eepd1	2.5329	0.001		4.7202	5.1259	4.947	7.7329	7.7109	6.9479
ENSMUSG00000035818	Plekhs1	2.5318	0.0235		5.2303	6.7102	4.7064	7.7201	9.3796	7.1427
ENSMUSG00000079033	Mef2b	2.5237	0.0047		2.3266	3.0733	2.671	5.6246	5.6614	4.3559
ENSMUSG00000025515	Muc2	2.5145	0.0163		3.336	3.0733	2.48	6.5934	5.6913	4.1482
ENSMUSG00000041798	Gck	2.5144	0.0268		3.7167	5.2978	2.8396	6.0722	7.549	5.7762
ENSMUSG00000022346	Myc	2.5135	0.0002		9.7306	10.1118	9.9178	12.5735	12.0874	12.6398
ENSMUSG00000019852	Arfgef3	2.5128	0.0001		8.8337	8.9258	9.3562	11.6307	11.5088	11.5147
ENSMUSG00000038418	Egr1	2.5124	0.0084		9.5468	8.9284	8.3247	12.6676	10.9596	10.71
ENSMUSG00000062753	AI413582	2.5079	0.0006		7.0339	6.7463	7.3461	9.1056	9.9173	9.6271
ENSMUSG00000021411	Pxdc1	2.5058	0.0002		8.3629	8.22	8.6565	10.853	11.1123	10.7916
ENSMUSG00000025432	Avil	2.5049	0.0009		5.343	5.8985	5.1531	8.1331	7.605	8.1711
ENSMUSG00000034773	Hrob	2.5039	0.0006		8.0286	7.425	8.0773	10.8217	10.207	10.0138
ENSMUSG00000072812	NA	2.5037	0.0113		8.006	8.8366	7.8931	11.7044	11.1545	9.3879
ENSMUSG00000010362	Rdm1	2.5006	0.0003		7.6595	7.9167	7.731	10.0524	10.7105	10.046
ENSMUSG00000075704	Txnrd2	2.4972	0.0013		9.3961	8.8505	9.3838	12.4682	11.2889	11.365
ENSMUSG00000020151	Ptprr	2.4958	0.0014		3.4743	3.3482	3.1272	6.0923	5.9847	5.3601
ENSMUSG00000002983	Relb	2.4955	0.0002		7.9655	8.5025	8.6366	10.9171	10.7634	10.9106
ENSMUSG00000111324	Gm31410	2.4927	0.0031		4.0176	3.868	4.6164	7.3872	6.3829	6.21
ENSMUSG00000026456	Cyb5r1	2.4917	0.0003		9.3429	9.1442	9.6047	11.7577	11.5094	12.2998
ENSMUSG00000020695	Mrc2	2.4884	0.011		2.8174	4.2493	2.9906	6.5792	6.0322	4.9112
ENSMUSG00000032726	Bmp8a	2.4794	0.0106		3.183	4.0328	3.252	6.9863	6.0086	4.9112
ENSMUSG00000041842	Fhdc1	2.4766	0.0006		7.6883	7.6383	8.5692	10.4512	10.4284	10.446
ENSMUSG00000103183	Gm37090	2.4681	0.0063		5.343	6.1163	4.3632	7.2507	8.262	7.714
ENSMUSG00000066952	Myo1h	2.4651	0.0014		2.5928	2.5278	2.48	5.318	4.9793	4.6988
ENSMUSG00000039191	Rbpj	2.4649	0.0002		10.9636	10.7352	10.7447	13.5446	13.3628	12.9309
ENSMUSG00000041920	Slc16a6	2.463	0.0066		6.0881	5.4801	5.683	9.304	7.3479	7.9881
ENSMUSG00000025473	Adam8	2.4625	0.008		5.6362	6.1879	6.3605	8.9267	9.3187	7.3267
ENSMUSG00000014905	Dnajb9	2.4617	0.0002		8.6956	8.8697	8.508	11.3659	10.8644	11.228
ENSMUSG00000016239	Lonrf3	2.4612	0.0003		8.4619	7.8901	7.8786	10.7428	10.6163	10.255
ENSMUSG00000034640	Tiparp	2.4592	0.0007		10.012	9.6245	10.0386	12.6304	12.7311	11.691
ENSMUSG00000050022	Amz1	2.4581	0.0007		4.9746	5.2315	4.8712	7.4509	7.8164	7.1842
ENSMUSG00000010095	Slc3a2	2.4523	0.0001		11.8606	11.6762	11.8416	13.9797	14.2992	14.4564
ENSMUSG00000087341	0610040F04Rik	2.4497	0.0019		2.5928	2.5278	2.48	5.015	5.397	4.5375
ENSMUSG00000087141	Plcxd2	2.4473	0.004		9.976	9.7949	10.0277	13.4828	11.641	12.0168
ENSMUSG00000023034	Nr4a1	2.447	0.004		6.3798	6.2728	5.4422	8.887	8.9122	7.6365
ENSMUSG00000033730	Egr3	2.4467	0.0201		2.3266	2.2879	2.671	6.331	4.5279	3.7668
ENSMUSG00000038155	Gstp2	2.4448	0.0017		2.8174	3.3482	3.3669	5.9452	5.6614	5.2603
ENSMUSG00000056501	Cebpb	2.4427	0.0003		8.006	8.2454	8.5572	10.8111	10.3924	10.9331
ENSMUSG00000038602	Slc35f1	2.4383	0.0955		5.5449	4.7997	9.1551	9.3693	8.7263	8.7191
ENSMUSG00000063011	Msln	2.4367	0.0009		11.0995	11.8803	11.3509	14.0889	14.2609	13.2909
ENSMUSG00000039384	Dusp10	2.4354	0.0002		8.8655	8.5372	8.9493	11.4961	11.1179	11.0442
ENSMUSG00000086665	Gm13067	2.4274	0.001		4.4113	4.7051	4.7494	7.2417	7.2807	6.6256
ENSMUSG00000105356	Gm42603	2.4253	0.0015		5.4807	5.3612	6.1032	7.654	8.0067	8.5603
ENSMUSG00000012519	Mlkl	2.4242	0.0006		7.2026	6.501	6.7994	9.1661	9.5826	9.027
ENSMUSG00000111825	Gm10646	2.4227	0.0025		3.6006	2.9133	3.5724	6.0923	5.2839	5.9783
ENSMUSG00000065610	Mir29a	2.4182	0.0217		3.7167	4.5506	5.4682	6.4911	6.2284	8.2707
ENSMUSG00000004936	Map2k1	2.4175	0.0002		10.2425	10.8173	10.3281	13.0156	12.877	12.7477
ENSMUSG00000039911	Spsb1	2.4111	0.001		7.0888	7.8847	7.7575	9.5031	10.2591	10.2021
ENSMUSG00000088552	Mir1957a	2.4092	0.0038		3.8241	4.7997	3.3669	6.2074	6.5553	6.4555
ENSMUSG00000086003	B230206L02Rik	2.4073	0.0008		4.8782	5.089	4.5692	7.3625	7.3849	7.0107
ENSMUSG00000086290	Snhg12	2.4052	0.0006		8.006	8.081	8.69	10.3027	10.6105	11.0794
ENSMUSG00000027397	Slc20a1	2.405	0.0004		9.5131	9.304	10.0558	12.3715	11.9546	11.7617
ENSMUSG00000105528	Gm43519	2.4042	0.0022		4.4113	3.4682	4.3632	6.2617	6.7382	6.4555
ENSMUSG00000008129	Brme1	2.4027	0.0055		4.9272	5.4513	5.5914	8.7096	7.0579	7.4106
ENSMUSG00000111394	Gm49759	2.4013	0.0004		8.5428	9.4127	8.8736	11.3388	11.5234	11.1707
ENSMUSG00000037855	Zfp365	2.3999	0.0052		5.9992	5.642	6.3466	9.2197	8.5001	7.4677
ENSMUSG00000086775	Snhg7os	2.3985	0.0035		4.1881	5.051	5.3889	6.9863	7.0231	7.8142
ENSMUSG00000027611	Procr	2.3906	0.003		2.3266	2.2879	2.671	4.326	4.7712	5.3601
ENSMUSG00000015312	Gadd45b	2.3904	0.0058		8.203	9.2316	10.3013	11.7788	11.5649	11.5633
ENSMUSG00000031486	Adgra2	2.3901	0.0173		2.3266	3.7779	3.4733	6.314	5.9847	4.4496
ENSMUSG00000055493	Epm2a	2.3896	0.005		3.8241	4.8447	5.0537	7.3459	6.3077	7.2377
ENSMUSG00000041801	Phlda3	2.3867	0.0021		9.8306	9.2038	10.0792	12.8547	11.6918	11.7271
ENSMUSG00000034205	Loxl2	2.3847	0.0076		2.8174	3.3482	3.7522	6.6351	5.2839	5.153
ENSMUSG00000052302	Tbc1d30	2.3833	0.0013		2.8174	3.2173	2.8396	5.248	5.3226	5.4535
ENSMUSG00000031987	Egln1	2.3832	0.0008		10.6232	11.1343	10.1581	13.3455	13.0768	12.6429
ENSMUSG00000104917	Gm43289	2.3778	0.0007		4.2664	4.2493	4.1229	6.7021	6.5057	6.5641
ENSMUSG00000031557	Plekha2	2.3721	0.0006		8.9947	9.669	9.8342	12.1486	11.485	11.9805
ENSMUSG00000035678	Tnfsf9	2.369	0.003		6.0443	6.6857	5.3614	8.598	8.6598	7.9406
ENSMUSG00000019916	P4ha1	2.368	0.0002		11.8031	12.3512	11.9526	14.5551	14.3609	14.295
ENSMUSG00000028680	Plk3	2.367	0.0029		7.7711	7.2518	7.2596	10.3742	10.0885	8.9206
ENSMUSG00000080152	H3f4	2.3654	0.0707		3.0117	2.7334	2.9906	3.4076	5.0731	7.3512
ENSMUSG00000021123	Rdh12	2.3554	0.0033		5.6362	4.8884	5.3614	8.0888	7.9645	6.8989
ENSMUSG00000117446	Gm35551	2.352	0.0026		2.8174	3.7779	3.1272	5.806	5.6614	5.3111
ENSMUSG00000028217	Cdh17	2.3484	0.0143		2.5928	3.579	2.671	5.731	6.0086	4.1482
ENSMUSG00000029102	Hgfac	2.3453	0.0003		10.3282	10.3314	9.8317	12.8554	12.4517	12.2202
ENSMUSG00000097998	Gm27019	2.3453	0.0015		3.4743	4.1086	3.4733	6.0518	5.8848	6.1555
ENSMUSG00000028862	Map3k6	2.3451	0.0058		5.4135	5.1971	4.056	7.7457	6.6798	7.2765
ENSMUSG00000021668	Polk	2.3446	0.0008		9.1343	8.8778	8.69	11.7597	11.3143	10.6619
ENSMUSG00000032724	Abtb2	2.3438	0.0005		7.4151	8.2538	7.7416	10.3326	10.1463	9.9631
ENSMUSG00000053746	Ptrh1	2.3432	0.0004		7.7372	7.9008	8.3907	10.0841	10.4239	10.5501
ENSMUSG00000110239	Gm45620	2.3407	0.006		3.0117	2.7334	3.7522	4.8358	6.1006	5.5831
ENSMUSG00000097039	Pvt1	2.3404	0.0003		7.983	8.2028	7.9632	10.7171	10.4015	10.0516
ENSMUSG00000032942	Ucp3	2.3363	0.0302		3.9241	3.868	3.7522	7.6674	6.187	4.6988
ENSMUSG00000032776	Mctp2	2.3339	0.0215		2.3266	3.3482	2.2599	4.3924	6.2883	4.2558
ENSMUSG00000084616	NA	2.3261	0.0021		4.8782	4.972	3.9858	7.1391	6.8616	6.8135
ENSMUSG00000087381	Gm16008	2.3249	0.0011		5.9287	6.079	5.5676	7.8379	8.6408	8.0715
ENSMUSG00000021890	Eaf1	2.3216	0.0001		10.2303	10.2842	10.2338	12.5372	12.8347	12.3412
ENSMUSG00000044330	Gm9790	2.3209	0.0017		3.0117	3.2173	2.671	5.1745	5.5353	5.153
ENSMUSG00000031490	Eif4ebp1	2.3184	0.0003		10.8194	10.5672	11.2656	13.0871	13.1271	13.3931
ENSMUSG00000028542	Slc6a9	2.3183	0.0005		9.5111	9.1798	8.593	11.4966	11.3714	11.371
ENSMUSG00000085395	Gm13056	2.3168	0.0015		5.8546	5.877	5.6379	7.694	8.7263	7.8997
ENSMUSG00000110404	Rnf223	2.3162	0.0038		3.183	3.579	2.9906	5.7815	6.0086	4.9112
ENSMUSG00000043289	Mei4	2.3127	0.0058		3.6006	2.2879	3.6651	5.6246	5.2839	5.5831
ENSMUSG00000118367	Gm50277	2.3097	0.008		4.5429	4.3148	4.6164	7.902	6.3458	6.1555
ENSMUSG00000021701	Plk2	2.3072	0.0029		12.5052	12.4583	13.5338	15.7048	14.5868	15.127
ENSMUSG00000026354	Lct	2.3066	0.0288		2.5928	3.9527	3.252	6.7408	5.7206	4.2558
ENSMUSG00000002602	Axl	2.301	0.0029		11.0629	11.8364	12.5653	13.8427	14.5412	13.9838
ENSMUSG00000059900	Tmem40	2.301	0.0146		3.183	4.0328	2.2599	5.6246	6.0553	4.6988
ENSMUSG00000024883	Rin1	2.2964	0.0002		10.8813	10.8452	11.068	12.9042	13.4383	13.3414
ENSMUSG00000025006	Sorbs1	2.2941	0.002		8.4619	8.0429	8.1672	11.0745	10.7394	9.7403
ENSMUSG00000042751	Nmnat2	2.2935	0.0092		6.5459	5.9198	5.9823	9.192	8.8473	7.2892
ENSMUSG00000097363	Gm26717	2.2926	0.0266		3.336	3.3482	3.1272	7.0494	5.2839	4.3559
ENSMUSG00000093042	Mir3109	2.2908	0.0029		4.1881	4.1086	3.1272	6.1121	6.1445	6.0398
ENSMUSG00000022176	Rem2	2.2894	0.0016		4.1881	4.1806	4.8712	6.4911	6.9133	6.7037
ENSMUSG00000025020	Slit1	2.2865	0.0058		3.9241	4.4951	3.1272	6.3809	6.4011	5.6239
ENSMUSG00000001946	Esam	2.2857	0.0022		3.336	3.0733	3.1272	5.9003	5.397	5.0963
ENSMUSG00000031381	Piga	2.2845	0.0006		8.5349	8.7971	8.1869	11.1285	10.9024	10.3415
ENSMUSG00000112636	Gm47223	2.2825	0.0032		3.0117	2.9133	2.48	5.097	5.5353	4.6204
ENSMUSG00000049580	Tsku	2.2741	0.0001		9.6833	9.5984	9.3562	11.8156	11.8714	11.7731
ENSMUSG00000025225	Nfkb2	2.2731	0.0004		10.4443	10.928	10.8964	12.6644	13.3001	13.1236
ENSMUSG00000078653	Cntd1	2.2725	0.0052		3.7167	4.4951	4.1868	6.8976	6.6946	5.6239
ENSMUSG00000023175	Bsg	2.2702	0.0002		13.3104	13.5324	13.6586	15.705	15.6958	15.9112
ENSMUSG00000020048	Hsp90b1	2.2693	0.001		13.9902	13.4942	13.8399	16.611	15.8483	15.6728
ENSMUSG00000042349	Ikbke	2.2691	0.001		8.3495	8.5542	8.3702	11.3112	10.5967	10.1732
ENSMUSG00000031530	Dusp4	2.269	0.0004		9.9977	9.5685	10.2656	12.2427	11.9427	12.4535
ENSMUSG00000019055	Plod1	2.2677	0.0047		9.2759	10.87	9.3193	12.2377	12.2484	11.7821
ENSMUSG00000003746	Man1a	2.2633	0.0011		10.0947	9.4441	10.2619	12.6873	12.0895	11.8138
ENSMUSG00000027356	Fermt1	2.2579	0.0439		5.803	7.1657	8.1869	8.0326	9.4985	10.3984
ENSMUSG00000108736	Gm45151	2.2579	0.0063		4.5429	3.9527	3.7522	7.0899	6.3077	5.6239
ENSMUSG00000097028	Ptgs2os	2.2544	0.0047		3.0117	2.5278	3.252	5.731	5.2032	4.6204
ENSMUSG00000034845	Plvap	2.2509	0.0021		3.6006	3.2173	3.9858	5.9003	6.0322	5.6239
ENSMUSG00000045319	Proser2	2.2488	0.0022		8.57	9.4331	8.3941	11.1309	11.5015	10.5112
ENSMUSG00000062070	Pgk1	2.2482	0.0004		12.9478	13.5977	13.0233	15.4799	15.5081	15.3255
ENSMUSG00000064267	Hvcn1	2.2478	0.0521		4.8782	5.1971	2.9906	7.6874	6.8616	5.2603
ENSMUSG00000085976	Gm13816	2.2453	0.0026		2.3266	2.2879	2.9906	4.9282	4.7141	4.6988
ENSMUSG00000051022	Hs3st1	2.2358	0.0217		5.2303	5.4219	3.8344	7.2144	7.9398	6.0398
ENSMUSG00000010830	Kdelr3	2.2339	0.0009		7.6883	8.4267	7.4861	9.9974	10.3403	9.9651
ENSMUSG00000116321	Gm49522	2.2312	0.0029		3.4743	3.3482	3.3669	5.097	6.1227	5.6635
ENSMUSG00000096917	2500002B13Rik	2.231	0.004		5.4135	6.2562	6.0353	8.8696	7.7681	7.7604
ENSMUSG00000102278	Gm37145	2.2292	0.0019		4.4113	4.4951	4.7494	6.2793	7.0231	7.0411
ENSMUSG00000032231	Anxa2	2.229	0.0004		13.4339	13.7006	13.3599	15.7449	16.0053	15.4312
ENSMUSG00000041974	Spidr	2.2285	0.0002		9.3896	9.1599	9.5661	11.847	11.6096	11.3446
ENSMUSG00000090576	Gm17055	2.2272	0.0027		2.5928	2.9133	2.2599	4.8827	4.5279	5.0372
ENSMUSG00000022483	Col2a1	2.2265	0.0198		2.3266	2.2879	2.48	5.8773	3.641	4.2558
ENSMUSG00000103622	Gm38391	2.2215	0.0051		4.3407	5.3918	5.0537	7.5988	6.4888	7.3633
ENSMUSG00000085156	Snhg15	2.221	0.0015		8.3405	7.9219	8.9969	11.0013	10.2802	10.641
ENSMUSG00000097960	A330074K22Rik	2.2187	0.004		4.0176	4.972	5.2461	6.8153	7.2807	6.7957
ENSMUSG00000045817	Zfp36l2	2.2182	0.0002		11.3676	11.2393	11.1635	13.4449	13.7523	13.2277
ENSMUSG00000102380	Gm38140	2.2159	0.0045		3.8241	4.0328	4.6164	6.9755	5.8321	6.3133
ENSMUSG00000043488	Frmd8os	2.2154	0.0076		3.8241	4.4951	3.7522	7.1098	5.6614	5.9465
ENSMUSG00000087159	Gm15246	2.2153	0.0057		2.8174	4.1806	3.4733	5.3518	5.8848	5.8808
ENSMUSG00000029385	Ccng2	2.2119	0.0019		10.362	11.4494	10.8083	13.4053	13.2954	12.5548
ENSMUSG00000085929	Gm13421	2.2107	0.0011		5.2303	4.9308	5.6606	7.5193	7.4121	7.5226
ENSMUSG00000021250	Fos	2.2057	0.0008		7.2026	7.6699	6.8496	9.3735	9.7012	9.2645
ENSMUSG00000044005	Gls2	2.2047	0.0024		4.8274	4.9308	5.6149	7.556	7.549	6.8822
ENSMUSG00000040249	Lrp1	2.2033	0.0092		7.1623	7.6447	7.5422	10.4326	10.0414	8.4849
ENSMUSG00000090582	Gm17024	2.2016	0.0009		4.7748	5.2315	4.947	7.2507	7.1789	7.1286
ENSMUSG00000044098	Rsbn1	2.1999	0.0002		9.7427	9.669	9.394	12.02	11.8208	11.5646
ENSMUSG00000053714	4732471J01Rik	2.198	0.0007		6.4317	6.9963	6.6024	8.798	9.1648	8.6616
ENSMUSG00000026480	Ncf2	2.1968	0.0061		2.5928	2.7334	2.9906	4.2564	5.0269	5.6239
ENSMUSG00000097021	4933433G15Rik	2.1952	0.0017		4.1054	4.1806	3.7522	6.3972	6.3458	5.8808
ENSMUSG00000069808	Tlcd3a	2.1921	0.0002		7.9888	7.7491	7.9402	10.1407	10.1368	9.9769
ENSMUSG00000028758	Kif17	2.1896	0.116		3.4743	4.1806	2.671	6.6488	6.9994	3.2468
ENSMUSG00000023272	Creld2	2.1829	0.0007		9.8063	9.7541	9.7937	12.5697	11.6164	11.7165
ENSMUSG00000031098	Syt8	2.1788	0.0013		7.7164	8.6962	8.5752	10.6885	10.627	10.2088
ENSMUSG00000032575	Manf	2.1763	0.0003		10.6527	10.4326	10.9024	12.9221	12.5553	13.0391
ENSMUSG00000042216	Sgsm1	2.1759	0.0344		3.336	3.6819	2.48	6.2617	5.8587	3.9054
ENSMUSG00000061397	Krt79	2.1749	0.0439		3.4743	2.7334	2.671	6.5061	5.2839	3.6134
ENSMUSG00000008384	Sertad1	2.1742	0.0003		9.0372	9.2755	9.2253	11.0996	11.6662	11.295
ENSMUSG00000018800	Abca5	2.1707	0.0037		4.7202	5.2978	4.7912	7.4586	7.43	6.4327
ENSMUSG00000020788	Atp2a3	2.1648	0.012		4.1054	3.579	3.5724	6.9755	5.5679	5.2077
ENSMUSG00000109864	Eid3	2.163	0.0012		6.3621	6.2395	6.6372	8.1619	8.558	9.0078
ENSMUSG00000117975	Itprip	2.1602	0.0005		9.9643	9.9614	10.3448	12.4055	12.5454	11.8
ENSMUSG00000115406	Gm49300	2.1575	0.0454		2.3266	2.2879	2.2599	6.1317	3.9684	3.2468
ENSMUSG00000079334	Naa80	2.1555	0.0077		7.4491	7.8901	7.5237	10.8698	9.3658	9.0937
ENSMUSG00000111079	Gm47112	2.149	0.0032		4.0176	3.0733	3.6651	5.5683	5.7206	5.914
ENSMUSG00000028341	Nr4a3	2.1447	0.153		3.183	4.0328	2.2599	7.7329	4.93	3.2468
ENSMUSG00000085274	BC046401	2.1444	0.0031		4.1054	3.2173	3.9858	5.9229	5.7493	6.0696
ENSMUSG00000024778	Fas	2.144	0.0602		3.336	2.2879	4.056	7.0076	4.6546	4.4496
ENSMUSG00000112544	Gm48089	2.143	0.0062		2.3266	3.3482	2.2599	4.9282	4.46	4.9755
ENSMUSG00000024661	Fth1	2.1418	0.0117		13.5766	13.5368	12.3949	15.7596	15.8868	14.2873
ENSMUSG00000025130	P4hb	2.1396	0.0006		13.5668	13.8543	13.4831	16.1572	15.6587	15.5072
ENSMUSG00000023952	Gtpbp2	2.1386	0.0001		10.2242	10.4363	10.2376	12.4733	12.2683	12.5725
ENSMUSG00000023393	Slc17a9	2.1345	0.0279		3.6006	3.7779	3.252	6.9537	5.6309	4.4496
ENSMUSG00000034751	Mast4	2.1331	0.0123		10.2279	10.0542	9.4439	12.948	12.3084	10.8689
ENSMUSG00000037679	Inf2	2.1319	0.0022		9.2993	9.206	8.8712	11.7199	11.5629	10.4894
ENSMUSG00000047153	Khnyn	2.1316	0.0006		9.7597	10.4753	9.9342	12.3199	12.3662	11.8779
ENSMUSG00000028545	Bend5	2.1257	0.0012		8.3762	8.4451	7.9216	10.8771	10.3427	9.9002
ENSMUSG00000061232	H2-K1	2.1246	0.001		10.0401	9.9264	10.7968	12.3079	12.1145	12.7148
ENSMUSG00000007035	Msh5	2.1205	0.0058		6.4146	5.9613	6.7259	9.3381	8.201	7.9243
ENSMUSG00000028128	F3	2.1158	0.0002		8.9716	8.9569	9.1868	10.996	11.0219	11.4446
ENSMUSG00000108456	4732496C06Rik	2.1158	0.0156		4.8782	4.7051	4.1229	7.7265	6.5874	5.7396
ENSMUSG00000053470	Kdm3a	2.1114	0.0044		10.9985	11.7498	10.8838	14.1365	13.0304	12.7995
ENSMUSG00000097145	9230114K14Rik	2.1099	0.0105		6.5615	6.1704	6.0697	9.4803	7.9948	7.6563
ENSMUSG00000037428	Vgf	2.1091	0.0041		2.3266	2.7334	2.671	5.1745	4.5279	4.3559
ENSMUSG00000074415	Mir100hg	2.1073	0.0083		6.7229	7.6125	6.518	9.0731	9.8125	8.2898
ENSMUSG00000026305	Lrrfip1	2.1065	0.0007		12.4864	11.6633	12.4155	14.4423	14.239	14.2034
ENSMUSG00000062991	Nrg1	2.1012	0.0029		10.1266	9.2274	10.4786	12.4547	11.6634	12.0182
ENSMUSG00000074305	Peak1	2.0965	0.014		9.8672	10.0446	8.9585	12.3337	12.259	10.5672
ENSMUSG00000110537	Gm4316	2.0912	0.0065		2.5928	2.2879	2.48	5.1362	4.5926	3.9054
ENSMUSG00000057836	Xlr3a	2.0828	0.0428		2.5928	2.5278	2.48	5.1362	5.6913	3.0214
ENSMUSG00000109708	Gm45809	2.0779	0.004		4.1054	3.7779	3.9121	5.9003	6.5874	5.5412
ENSMUSG00000026819	Slc25a25	2.0751	0.0006		9.5291	9.5277	10.0057	12.1686	11.5998	11.5194
ENSMUSG00000036006	Ripor2	2.0735	0.0008		9.3808	8.7115	9.6134	11.431	11.3725	11.1227
ENSMUSG00000116617	Gm49767	2.0672	0.0047		2.3266	2.7334	2.48	4.2564	4.3889	5.0963
ENSMUSG00000105466	Gm42998	2.0658	0.0125		4.1881	3.4682	4.9096	5.731	6.1006	6.9318
ENSMUSG00000114493	Gm47071	2.0605	0.012		2.3266	3.0733	2.671	5.417	4.93	3.9054
ENSMUSG00000056749	Nfil3	2.0603	0.0046		7.3266	8.1409	8.72	9.7382	10.0801	10.5501
ENSMUSG00000027800	Tm4sf1	2.0568	0.0229		6.9295	6.9036	9.0036	9.418	9.4772	10.1119
ENSMUSG00000042678	Myo15	2.0563	0.0298		3.4743	4.1086	3.4733	6.8153	5.9604	4.4496
ENSMUSG00000094018	S100a2	2.0537	0.0036		2.3266	2.2879	2.48	4.6311	4.5926	4.0319
ENSMUSG00000046223	Plaur	2.0492	0.0001		9.9317	10.1187	9.9913	12.0337	11.9829	12.1725
ENSMUSG00000020277	Pfkl	2.0491	0.0022		11.7559	12.9315	11.9216	14.2263	14.0759	14.4541
ENSMUSG00000086841	2410006H16Rik	2.0485	0.0014		10.1781	10.9901	10.7846	12.2201	12.8567	13.0216
ENSMUSG00000031762	Mt2	2.0446	0.0344		7.0671	8.0763	8.4795	9.3423	9.0882	11.3262
ENSMUSG00000039942	Ptger4	2.0436	0.0007		6.251	6.2892	6.4282	8.1428	8.3395	8.6169
ENSMUSG00000074945	Olfr1314	2.0424	0.0215		4.1054	2.9133	3.3669	6.0311	6.0322	4.4496
ENSMUSG00000030659	Nucb2	2.0389	0.0006		8.6156	8.0185	8.4176	10.6777	10.2802	10.2105
ENSMUSG00000001473	Tubb6	2.0361	0.0021		10.2131	9.3457	10.6486	12.0646	12.0835	12.1678
ENSMUSG00000005057	Sh2b2	2.0358	0.0083		3.4743	3.7779	3.9121	5.8773	6.4191	4.9755
ENSMUSG00000030730	Atp2a1	2.0358	0.0103		2.3266	3.2173	3.3669	4.4559	4.9793	5.5831
ENSMUSG00000026435	Slc45a3	2.0357	0.0035		5.0205	5.4219	4.8317	7.1583	7.5971	6.6256
ENSMUSG00000020620	Abca8b	2.0347	0.0403		3.6006	2.9133	2.8396	6.6074	4.1515	4.6988
ENSMUSG00000107741	Gm2011	2.0287	0.0029		4.1054	4.7997	4.3068	6.5649	6.6344	6.0988
ENSMUSG00000044313	Mab21l3	2.0279	0.0794		5.1081	3.7779	5.3889	8.4104	5.3226	6.6256
ENSMUSG00000022598	Psca	2.0255	0.0484		3.336	3.9527	3.6651	6.4758	6.5224	4.0319
ENSMUSG00000021025	Nfkbia	2.0246	0.005		8.385	8.4006	8.4109	11.0971	10.6689	9.5043
ENSMUSG00000040472	Rabggta	2.0222	0.0004		9.0893	9.1886	9.3614	11.0464	11.6106	11.0489
ENSMUSG00000054150	Syne3	2.0191	0.0173		8.9058	9.3613	8.056	11.3777	11.3143	9.6884
ENSMUSG00000057948	Unc13d	2.0179	0.0002		9.6689	10.0116	9.7267	11.9835	11.6807	11.7967
ENSMUSG00000029314	Gpat3	2.0169	0.0005		6.6074	6.8821	6.6933	8.7607	8.8866	8.5863
ENSMUSG00000039831	Arhgap29	2.0169	0.0003		12.0537	12.0435	11.5468	13.8805	13.9975	13.8166
ENSMUSG00000108563	Gm44686	2.0144	0.0112		2.3266	3.3482	3.1272	5.6246	4.7712	4.4496
ENSMUSG00000041642	Kif21b	2.0138	0.0071		3.183	4.1806	3.7522	6.2617	5.5353	5.3601
ENSMUSG00000011752	Pgam1	2.0131	0.0014		11.6436	12.3636	11.5187	14.1047	14.0178	13.4427
ENSMUSG00000052415	Tchh	2.0125	0.0071		2.8174	3.579	2.671	5.2834	5.2839	4.5375
ENSMUSG00000006205	Htra1	2.0119	0.0078		3.7167	4.3774	4.5204	6.8861	6.1006	5.6635
ENSMUSG00000115249	Gm49085	2.0112	0.0022		3.4743	3.3482	3.7522	5.4794	5.6309	5.498
ENSMUSG00000033538	Casp4	2.0074	0.0319		5.722	4.0328	6.388	7.7071	6.8616	7.5961
ENSMUSG00000075569	Rsph10b	2.0023	0.0109		3.0117	3.868	3.1272	6.0311	5.2839	4.6988
ENSMUSG00000041180	Hectd2	2.0018	0.0032		4.6635	3.7779	4.3632	6.2438	6.2284	6.338
ENSMUSG00000100599	1700120C14Rik	2.0016	0.0046		4.4113	4.7051	5.1848	7.2236	6.7944	6.2881
ENSMUSG00000034825	Nrip3	2.0012	0.0018		6.2316	6.0214	5.9641	7.8199	7.8299	8.5707
ENSMUSG00000041957	Pkp2	1.999	0.0002		9.9833	10.2268	9.9991	12.2603	12.1107	11.8351
ENSMUSG00000068744	Psrc1	1.9985	0.0015		8.9271	8.0857	8.8881	10.9697	10.505	10.4217
ENSMUSG00000052727	Map1b	1.9935	0.0002		10.4838	10.3801	10.6061	12.37	12.4448	12.6358
ENSMUSG00000016552	Foxred2	1.9917	0.128		2.5928	3.7779	2.48	6.8746	4.93	3.0214
ENSMUSG00000073274	Gm14636	1.9892	0.0007		6.8299	6.7698	6.7151	8.5147	9.0627	8.7049
ENSMUSG00000020407	Upp1	1.9882	0.0055		7.045	6.1879	7.6311	9.2128	8.959	8.6567
ENSMUSG00000110498	A630001O12Rik	1.9873	0.012		2.8174	2.2879	3.1272	5.5097	4.2351	4.4496
ENSMUSG00000110631	Gm42047	1.9863	0.0025		6.289	6.0978	6.1521	8.7418	8.0419	7.714
ENSMUSG00000024359	Hspa9	1.9856	0.0007		13.7597	13.2435	13.8073	15.8434	15.424	15.4999
ENSMUSG00000040543	Pitpnm3	1.9805	0.0009		8.6043	9.2422	8.3907	10.5814	10.799	10.7983
ENSMUSG00000104701	Gm42555	1.9802	0.0335		3.0117	2.2879	3.9858	5.5393	4.0629	5.6239
ENSMUSG00000084899	Gm15344	1.9797	0.0022		4.9272	5.3918	5.3614	7.1773	6.8877	7.5546
ENSMUSG00000073198	Bnip3l-ps	1.977	0.0042		4.4786	4.4375	3.7522	5.8773	6.539	6.183
ENSMUSG00000085457	1110046J04Rik	1.9751	0.0014		5.2303	5.642	5.3334	7.4893	7.4992	7.1427
ENSMUSG00000028389	Zfp37	1.9746	0.0004		8.3038	8.6683	8.2593	10.5122	10.4871	10.156
ENSMUSG00000097134	1110002J07Rik	1.9736	0.0113		2.3266	2.7334	2.671	5.3848	4.2351	4.0319
ENSMUSG00000020572	Nampt	1.9722	0.0006		11.4205	11.7569	11.0985	13.5974	13.5109	13.0843
ENSMUSG00000055116	Arntl	1.9707	0.0003		8.9832	9.0367	8.5632	10.9015	10.8371	10.7565
ENSMUSG00000032322	Pstpip1	1.9702	0.0052		2.3266	3.0733	2.671	4.9723	4.3889	4.6204
ENSMUSG00000031750	Il34	1.9656	0.0043		7.1207	8.109	6.9907	9.1661	9.8108	9.1401
ENSMUSG00000044854	1700056E22Rik	1.9639	0.005		4.4113	5.0121	5.1531	7.3708	6.4717	6.6256
ENSMUSG00000095115	Itpripl2	1.9634	0.0005		9.2783	9.7288	9.9319	11.4354	11.6439	11.7497
ENSMUSG00000022385	Gtse1	1.9632	0.0014		10.3598	9.6469	10.1176	12.4776	11.9128	11.6235
ENSMUSG00000040703	Cyp2s1	1.9568	0.0066		6.9295	8.1136	6.9817	9.5254	9.6181	8.7517
ENSMUSG00000100865	Gm9320	1.9558	0.0047		4.3407	4.604	4.8317	6.0722	6.4717	7.1
ENSMUSG00000062198	2700097O09Rik	1.9544	0.0016		6.9651	7.476	7.6079	8.9462	9.6602	9.3058
ENSMUSG00000062785	Kcnc3	1.9537	0.021		4.3407	5.8552	3.9858	6.6488	7.0807	6.3133
ENSMUSG00000109366	Gm44698	1.9531	0.0063		3.183	3.2173	3.252	4.8358	5.8321	4.8438
ENSMUSG00000063760	Rnf217	1.9524	0.0004		9.649	9.6564	9.683	11.9659	11.3685	11.5113
ENSMUSG00000030000	Add2	1.9523	0.0375		3.183	2.2879	2.671	5.731	4.8261	3.4417
ENSMUSG00000115882	Gm5481	1.9504	0.0048		3.336	3.0733	2.671	4.8358	5.3226	4.7731
ENSMUSG00000046814	Gchfr	1.9472	0.0084		2.5928	2.9133	3.8344	4.8827	5.2032	5.0963
ENSMUSG00000035673	Sbno2	1.9466	0.0004		10.8727	11.043	11.1891	13.3371	12.7589	12.8487
ENSMUSG00000079575	Rbpj-ps3	1.9438	0.0093		3.0117	3.0733	3.5724	5.6788	5.3603	4.4496
ENSMUSG00000059040	Eno1b	1.9428	0.0106		4.3407	4.8884	4.5692	5.652	6.8747	7.1
ENSMUSG00000117270	Gm49953	1.9416	0.0076		2.5928	3.0733	2.8396	4.2564	4.7141	5.3601
ENSMUSG00000078249	Hmga1b	1.9409	0.0145		3.183	3.6819	2.48	5.0566	5.6614	4.4496
ENSMUSG00000031609	Sap30	1.9398	0.0007		8.8592	9.1754	9.5	10.7936	11.2648	11.2958
ENSMUSG00000114285	Gm47773	1.9388	0.0163		3.4743	3.2173	2.2599	4.5167	5.6309	4.6204
ENSMUSG00000024556	Me2	1.9376	0.0002		10.7002	10.5255	10.7898	12.4532	12.8229	12.5521
ENSMUSG00000091635	Vmn2r13	1.9374	0.0068		3.0117	2.7334	2.8396	5.318	4.2351	4.8438
ENSMUSG00000039813	Tbc1d2	1.9369	0.0063		9.5874	9.8946	8.9378	11.9314	11.6793	10.6197
ENSMUSG00000110148	5830408C22Rik	1.9349	0.0038		4.1054	4.7997	4.3632	6.314	6.0553	6.7037
ENSMUSG00000061815	Rufy4	1.9331	0.0106		3.0117	2.5278	2.671	5.1745	4.93	3.9054
ENSMUSG00000028300	C9orf72	1.9315	0.0004		9.2496	9.6229	9.4108	11.1616	11.6539	11.2623
ENSMUSG00000052525	Spdya	1.927	0.0041		3.8241	3.6819	4.1229	5.4794	6.2284	5.7021
ENSMUSG00000030208	Emp1	1.9252	0.0115		12.3632	11.9311	11.4714	14.2627	14.4595	12.8191
ENSMUSG00000113776	Gm19327	1.9233	0.0043		5.4807	5.877	4.8317	7.0799	7.5652	7.3143
ENSMUSG00000024805	Pcgf5	1.9195	0.0019		10.8063	10.7019	10.1935	12.7597	12.7884	11.9122
ENSMUSG00000097835	Gm26910	1.9178	0.0039		4.5429	4.604	5.019	7.0286	6.187	6.7037
ENSMUSG00000034731	Dgkh	1.917	0.0018		5.722	5.6922	6.23	7.9633	7.549	7.883
ENSMUSG00000046133	C130073F10Rik	1.9146	0.0094		3.4743	2.9133	3.4733	5.318	5.7493	4.5375
ENSMUSG00000046733	Gprc5a	1.9107	0.0237		10.2266	10.0373	8.7912	12.2722	11.9677	10.5474
ENSMUSG00000056055	Sag	1.9085	0.0062		4.0176	3.868	4.9835	6.2617	6.1227	6.21
ENSMUSG00000030522	Mtmr10	1.9083	0.0005		9.7748	9.8621	9.4373	11.431	11.9399	11.4282
ENSMUSG00000036390	Gadd45a	1.904	0.0023		9.638	9.3958	9.9365	11.2748	11.2007	12.2068
ENSMUSG00000000223	Drp2	1.9025	0.0438		4.2664	4.604	4.4176	7.4969	6.5874	4.9112
ENSMUSG00000001281	Itgb7	1.9006	0.0081		2.5928	2.2879	2.48	4.8358	4.46	3.7668
ENSMUSG00000036427	Gpi1	1.8991	0.0054		13.784	14.4399	13.1615	15.6002	16.1488	15.3338
ENSMUSG00000074625	Arhgap40	1.8985	0.1063		4.0176	4.7051	3.4733	7.3205	6.539	4.0319
ENSMUSG00000043192	Gpi-ps	1.897	0.024		4.6635	5.1259	3.3669	5.8773	6.9005	6.0696
ENSMUSG00000108804	Gm30437	1.8964	0.0107		2.8174	2.2879	2.671	4.1063	4.1515	5.2077
ENSMUSG00000005374	Tbl2	1.8959	0.0007		10.0934	10.5639	9.8564	12.2103	12.1479	11.8433
ENSMUSG00000025912	Mybl1	1.8957	0.0089		9.1831	8.4705	9.008	11.6705	10.651	10.0271
ENSMUSG00000047407	Tgif1	1.8941	0.0005		10.4092	10.5765	10.8886	12.247	12.5591	12.7503
ENSMUSG00000100291	2310069B03Rik	1.894	0.0419		3.8241	3.6819	4.3068	6.997	5.9604	4.5375
ENSMUSG00000029120	Ppp2r2c	1.8924	0.0694		2.5928	3.0733	2.48	5.9229	4.879	3.0214
ENSMUSG00000057321	Usp17ld	1.8919	0.0087		2.8174	2.2879	2.2599	4.2564	4.879	3.9054
ENSMUSG00000075701	Selenos	1.8909	0.0003		9.5251	9.4183	9.4041	11.2504	11.1824	11.5873
ENSMUSG00000032115	Hyou1	1.8893	0.0026		12.5808	12.409	12.5003	15.1049	13.9906	14.0626
ENSMUSG00000042549	Map2k3os	1.8863	0.0019		4.4786	4.4375	4.7064	6.4292	6.539	6.3133
ENSMUSG00000097519	4930558J18Rik	1.886	0.0016		5.6064	5.3298	5.4682	7.5119	7.465	7.0855
ENSMUSG00000056962	Jmjd6	1.8856	0.0004		10.0289	10.4482	10.3475	12.4066	12.0139	12.061
ENSMUSG00000069833	Ahnak	1.8856	0.0026		15.8326	16.1546	16.2186	18.0009	18.1994	17.6623
ENSMUSG00000020571	Pdia6	1.8841	0.0008		11.9819	11.8547	12.4675	14.3024	13.8421	13.8118
ENSMUSG00000103696	Gm37531	1.8838	0.0057		4.4786	3.868	4.7064	5.806	6.4888	6.4096
ENSMUSG00000026809	Spaca9	1.8836	0.0094		3.7167	4.7532	3.7522	5.9672	6.3645	5.5412
ENSMUSG00000085511	Gm11738	1.8834	0.012		2.5928	2.7334	2.8396	5.318	4.5926	3.9054
ENSMUSG00000021403	Serpinb9b	1.8829	0.0469		5.694	6.0601	8.1908	8.7258	8.0932	8.7745
ENSMUSG00000032558	Nphp3	1.8828	0.0011		7.2896	7.341	6.9077	9.2954	9.1352	8.7562
ENSMUSG00000050310	Rictor	1.8816	0.0023		10.8867	10.9629	10.9083	13.4828	12.6521	12.268
ENSMUSG00000047501	Cldn4	1.8802	0.0165		9.8656	9.8785	11.0712	12.444	11.2226	12.7894
ENSMUSG00000030256	Bhlhe41	1.8801	0.0042		9.3247	10.2321	9.5404	12.1825	11.4765	11.0785
ENSMUSG00000028108	Ecm1	1.8779	0.005		7.2126	7.3172	7.3738	9.4397	9.7158	8.3817
ENSMUSG00000115483	Gm9732	1.8767	0.0301		5.15	4.7051	4.9096	7.9904	6.6648	5.7396
ENSMUSG00000096655	1700065D16Rik	1.875	0.0044		2.8174	2.7334	3.252	5.015	4.7141	4.6988
ENSMUSG00000109460	Gm45591	1.8749	0.0072		3.7167	3.0733	4.056	5.8302	5.4329	5.2077
ENSMUSG00000074065	Gm10617	1.8741	0.0048		3.0117	3.3482	2.8396	5.1745	5.0269	4.6204
ENSMUSG00000033105	Lss	1.8737	0.0271		11.7462	10.4967	12.1374	14.3197	13.047	12.6348
ENSMUSG00000117310	Ptp4a1	1.8701	0.0061		2.5928	2.7334	3.3669	4.8358	4.93	4.5375
ENSMUSG00000051457	Spn	1.8672	0.0262		3.183	3.4682	4.1229	5.097	6.5057	4.7731
ENSMUSG00000037260	Hgsnat	1.8668	0.0045		10.4199	10.6741	10.3413	13.0066	12.4593	11.5698
ENSMUSG00000104253	Gm37174	1.8662	0.0059		4.0176	4.3148	4.5692	6.4449	5.5997	6.4555
ENSMUSG00000049971	Glt1d1	1.8643	0.0069		7.5067	7.2518	8.1229	10.0265	8.7619	9.686
ENSMUSG00000060961	Slc4a4	1.8636	0.0109		6.6663	8.4415	7.8883	9.4727	9.6374	9.4768
ENSMUSG00000039099	Wdr93	1.8634	0.0082		3.9241	4.4951	4.7494	6.7909	6.2284	5.7396
ENSMUSG00000025196	Cpn1	1.8626	0.0115		4.0176	5.265	3.8344	6.314	6.2079	6.183
ENSMUSG00000017943	Gdap1l1	1.8623	0.0261		2.3266	3.7779	3.1272	5.731	4.3889	4.6988
ENSMUSG00000044447	Dock5	1.8618	0.002		9.6306	9.1008	8.8639	11.4354	11.1268	10.6185
ENSMUSG00000011148	Adssl1	1.859	0.0573		4.4113	4.1806	3.1272	6.5211	6.4191	4.3559
ENSMUSG00000078952	Lncenc1	1.8573	0.006		4.2664	4.4951	5.2758	6.8153	6.5057	6.2881
ENSMUSG00000114282	5330431K02Rik	1.8573	0.0082		4.0176	3.9527	3.7522	5.0566	6.2284	6.0094
ENSMUSG00000105848	Gm42683	1.8555	0.0068		4.2664	4.7051	4.4699	5.6788	6.7238	6.6054
ENSMUSG00000033854	Kcnk10	1.8542	0.012		5.065	6.0016	6.5907	7.9413	7.2905	7.9881
ENSMUSG00000086443	4933421A08Rik	1.854	0.0258		3.183	3.0733	2.8396	5.5393	3.7586	5.3601
ENSMUSG00000107198	Gm19619	1.8536	0.0484		2.3266	2.9133	2.2599	5.3848	4.6546	3.0214
ENSMUSG00000015837	Sqstm1	1.8532	0.0008		13.8555	13.8628	13.9223	16.0917	15.4588	15.6498
ENSMUSG00000026142	Rhbdd1	1.8517	0.0009		10.3191	9.8906	10.3777	12.4093	11.6927	12.0405
ENSMUSG00000043415	Otud1	1.848	0.0013		7.983	8.331	8.0941	9.735	9.757	10.4601
ENSMUSG00000084817	Gm5526	1.8454	0.0078		4.9746	4.7051	5.2461	7.1773	6.1006	7.1842
ENSMUSG00000031570	Plpp5	1.8444	0.0027		8.2899	8.0525	8.6452	9.7729	9.9868	10.7611
ENSMUSG00000021266	Wars	1.8439	0.0003		10.596	10.382	10.5357	12.5315	12.1131	12.4007
ENSMUSG00000004864	Mapk13	1.8434	0.0275		4.4786	5.162	4.1229	6.6351	7.2509	5.4076
ENSMUSG00000086997	Gm12981	1.843	0.0089		4.8782	3.7779	4.8712	6.4292	6.5874	6.0398
ENSMUSG00000115009	G930009F23Rik ENSMUSG00000115009	1.8427	0.0014		8.006	8.6494	8.7783	10.5832	10.173	10.2055
ENSMUSG00000062380	Tubb3	1.8418	0.0328		5.576	6.9963	6.1837	8.0533	9.0854	7.1427
ENSMUSG00000060621	Nkpd1	1.8412	0.0159		2.5928	4.0328	2.9906	5.417	4.879	4.8438
ENSMUSG00000072437	Nanos1	1.8404	0.0013		8.345	8.258	8.1473	10.5363	10.0758	9.6593
ENSMUSG00000000078	Klf6	1.8394	0.0044		11.9794	12.2066	11.9405	14.6774	13.3207	13.6465
ENSMUSG00000025007	Aldh18a1	1.8378	0.0003		11.9735	11.6166	11.9535	13.5714	13.7542	13.7315
ENSMUSG00000087424	5730405O15Rik	1.8378	0.0027		4.7202	4.8447	4.8317	6.5504	6.3645	6.9952
ENSMUSG00000020326	Ccng1	1.8375	0.0035		12.564	11.8991	12.2427	14.5818	14.1951	13.4413
ENSMUSG00000026504	Sdccag8	1.8372	0.0008		8.7374	8.9414	8.8953	10.9663	10.8677	10.2517
ENSMUSG00000035637	Grhpr	1.8363	0.0013		9.3541	10.0744	9.1691	11.2375	11.4882	11.3807
ENSMUSG00000029992	Gfpt1	1.8342	0.0092		11.2291	11.159	10.1186	13.1265	12.9533	11.9296
ENSMUSG00000038059	Smim3	1.8336	0.0006		9.2448	9.4695	9.7064	11.3633	10.9937	11.5646
ENSMUSG00000048458	Inka2	1.8336	0.0293		8.193	6.8493	7.4988	10.3701	8.4041	9.2677
ENSMUSG00000110266	Gm32742	1.8334	0.0128		2.5928	2.5278	2.671	5.1362	4.3889	3.7668
ENSMUSG00000028931	Kcnab2	1.8273	0.0223		7.2707	7.9531	6.8982	9.9264	9.5483	8.1292
ENSMUSG00000006800	Sulf2	1.8265	0.1604		7.7024	8.7913	5.9641	9.9961	10.4849	7.4565
ENSMUSG00000050953	Gja1	1.8259	0.0049		6.3076	6.414	7.454	8.6866	8.5211	8.4456
ENSMUSG00000001156	Mxd1	1.8252	0.032		8.8111	8.7999	8.0082	11.454	10.4796	9.161
ENSMUSG00000074794	Arrdc3	1.8218	0.0083		10.5663	11.1366	10.6024	13.4525	12.459	11.8593
ENSMUSG00000028211	Trp53inp1	1.8206	0.0149		12.2831	12.1917	12.1689	15.1325	13.8102	13.1628
ENSMUSG00000097772	5430416N02Rik	1.8204	0.004		8.6956	8.6173	9.4041	10.2056	10.7142	11.2583
ENSMUSG00000086754	Gm16098	1.819	0.0104		2.8174	2.7334	2.671	4.1833	4.2351	5.2603
ENSMUSG00000027605	Acss2	1.8156	0.03		8.3806	8.0037	7.747	10.9213	10.0298	8.6269
ENSMUSG00000097812	Gm26812	1.8149	0.0248		3.0117	2.7334	3.1272	3.749	5.0269	5.5412
ENSMUSG00000029648	Flt1	1.8123	0.0176		3.4743	4.3774	5.0537	5.9672	5.8321	6.5431
ENSMUSG00000020021	Fgd6	1.8119	0.0138		7.8559	7.9583	7.3531	9.9854	10.1053	8.5122
ENSMUSG00000027999	Pla2g12a	1.8115	0.0006		7.7644	7.8629	8.017	9.9278	9.4942	9.6569
ENSMUSG00000026131	Dst	1.8096	0.0005		12.376	12.2714	12.2908	14.4353	14.0785	13.8531
ENSMUSG00000020354	Sgcd	1.8082	0.0337		7.9419	7.5252	6.0526	9.6098	9.116	8.2184
ENSMUSG00000040918	Slc19a2	1.8078	0.0018		9.5701	9.4294	9.2648	11.8103	10.9982	10.8794
ENSMUSG00000055435	Maf	1.8072	0.0677		6.9295	6.2225	4.5204	8.6599	7.1576	7.2765
ENSMUSG00000028654	Mycl	1.8061	0.0055		3.7167	3.3482	3.9121	5.731	5.5679	5.0963
ENSMUSG00000022074	Tnfrsf10b	1.8043	0.0035		9.4069	9.117	8.8905	11.5625	10.8855	10.3791
ENSMUSG00000063524	Eno1	1.804	0.002		14.1225	14.7949	13.9536	16.1099	16.2457	15.9274
ENSMUSG00000030695	Aldoa	1.803	0.0029		14.6665	15.4073	14.5152	16.5258	16.8751	16.597
ENSMUSG00000082016	Pgam1-ps2	1.8028	0.0109		2.8174	3.4682	3.5724	5.015	5.6309	4.6204
ENSMUSG00000025185	Loxl4	1.8026	0.0014		9.1343	9.4838	9.9515	11.0172	11.4241	11.5362
ENSMUSG00000054409	Tmem74	1.8006	0.0107		3.9241	3.4682	4.4176	5.731	5.2441	6.2365
ENSMUSG00000044636	Csrnp2	1.799	0.0341		9.6082	9.8594	9.8441	13.0103	10.9238	10.7747
ENSMUSG00000025092	Hspa12a	1.7985	0.0896		4.8782	5.5634	5.3334	8.7161	6.9133	5.5412
ENSMUSG00000114687	Gm5452	1.7984	0.0145		3.0117	3.3482	2.2599	4.4559	5.2032	4.3559
ENSMUSG00000019851	Perp	1.7961	0.0008		9.6689	9.4731	9.971	11.7819	11.5669	11.1526
ENSMUSG00000104114	Gm37297	1.7951	0.0065		3.183	3.7779	4.1229	5.3848	5.6309	5.4535
ENSMUSG00000035504	Reep6	1.7949	0.0218		7.9239	7.8185	6.4544	9.6477	9.5111	8.4227
ENSMUSG00000034795	Ccdc122	1.7946	0.0355		5.694	4.3774	6.0353	7.556	6.2686	7.666
ENSMUSG00000025545	Clybl	1.7944	0.0003		8.1263	8.0904	8.2178	9.9934	9.8593	9.9651
ENSMUSG00000023456	Tpi1	1.7901	0.0008		13.7037	14.2208	13.6867	15.6877	15.5365	15.7574
ENSMUSG00000026447	Pik3c2b	1.7886	0.0181		6.7907	7.8241	6.5055	8.7544	9.5605	8.1711
ENSMUSG00000029217	Tec	1.7876	0.005		6.3798	7.3092	6.8197	8.598	9.0684	8.205
ENSMUSG00000042406	Atf4	1.7844	0.0016		12.7506	12.1446	12.9703	14.4826	14.133	14.6032
ENSMUSG00000089371	Mir1938	1.7831	0.0044		3.0117	3.4682	3.1272	4.9723	5.0731	4.9112
ENSMUSG00000085250	Gm15234	1.7827	0.0099		4.1881	3.0733	3.9858	5.7815	5.3603	5.4535
ENSMUSG00000057093	Zfp607b	1.7817	0.0051		5.8546	6.0978	6.4015	8.5035	7.5892	7.6063
ENSMUSG00000113769	5033406O09Rik	1.7814	0.0392		4.1054	5.9198	3.9121	6.17	6.8747	6.2365
ENSMUSG00000006641	Slc5a6	1.7771	0.0018		6.9174	6.8382	7.4145	9.0831	8.5861	8.8321
ENSMUSG00000003355	Fkbp11	1.7753	0.0039		4.2664	4.1806	4.3632	6.1317	5.6913	6.3133
ENSMUSG00000025823	Pdia4	1.7736	0.0036		12.3503	12.0881	12.6391	14.7953	13.7152	13.8879
ENSMUSG00000097792	Gm27042	1.7721	0.0063		3.336	3.868	3.4733	5.1362	5.1178	5.7396
ENSMUSG00000103364	Gm38157	1.7719	0.017		3.0117	3.6819	3.5724	4.3924	5.6913	5.498
ENSMUSG00000113015	Gm6296	1.7711	0.0146		3.183	2.5278	3.5724	4.3924	5.3603	4.8438
ENSMUSG00000026070	Il18r1	1.7682	0.0122		5.8798	6.7344	6.8096	7.8199	7.9083	9.0001
ENSMUSG00000015981	Stk32c	1.768	0.0567		3.336	3.4682	3.4733	6.2793	5.5353	3.7668
ENSMUSG00000041836	Ptpre	1.7661	0.0003		8.2129	8.2496	8.3529	10.0485	10.0687	9.9964
ENSMUSG00000027713	1810062G17Rik	1.7642	0.0071		3.7167	3.868	4.6621	5.9672	5.6913	5.8808
ENSMUSG00000114053	Gm35330	1.7639	0.0298		3.336	3.0733	3.6651	6.2074	4.46	4.6988
ENSMUSG00000032294	Pkm	1.7638	0.0011		14.656	15.1055	14.8556	16.5044	16.7724	16.6318
ENSMUSG00000031644	Nek1	1.7636	0.0015		9.5291	9.8261	9.2215	11.6294	11.3598	10.8784
ENSMUSG00000041515	Irf8	1.7631	0.0785		5.5132	5.8104	4.7064	7.7393	8.0819	5.498
ENSMUSG00000109784	Gm45493	1.7618	0.0045		4.3407	4.4375	4.2481	5.7815	6.0086	6.5217
ENSMUSG00000087132	A930001C03Rik	1.7595	0.0021		6.4981	6.515	6.5548	8.2674	8.6711	7.9079
ENSMUSG00000021282	Eif5	1.7555	0.0003		12.8119	12.7756	12.8173	14.4724	14.7522	14.4467
ENSMUSG00000064344	mt-Tm	1.7552	0.0192		3.183	2.2879	3.5724	4.7873	4.314	5.2077
ENSMUSG00000024164	C3	1.7551	0.0241		3.183	3.3482	3.4733	4.8358	6.0782	4.3559
ENSMUSG00000037185	Krt80	1.7547	0.0019		9.3631	9.6908	9.2977	11.6855	11.1968	10.7335
ENSMUSG00000009108	Gnat2	1.7532	0.0187		3.8241	3.6819	3.9858	6.3972	4.7712	5.5831
ENSMUSG00000057454	Lypd3	1.7526	0.1522		3.183	4.7532	2.48	6.2968	5.9356	3.4417
ENSMUSG00000002083	Bbc3	1.7518	0.0178		8.2805	8.8085	8.786	11.4574	10.0062	9.6667
ENSMUSG00000063506	Arhgap22	1.7489	0.0147		9.1755	9.1329	9.3228	11.9679	10.827	10.083
ENSMUSG00000090248	Gm14027	1.7477	0.0375		2.3266	3.2173	2.9906	5.5097	4.6546	3.6134
ENSMUSG00000030134	Rasgef1a	1.7471	0.0215		5.4135	5.089	4.7064	7.7956	6.4717	6.183
ENSMUSG00000093979	Gm2237	1.7457	0.0129		4.5429	5.2315	5.3334	7.474	6.6344	6.2365
ENSMUSG00000105199	Gm43581	1.7417	0.0071		5.3064	4.8447	5.8892	6.7661	7.1361	7.3633
ENSMUSG00000035498	Cdcp1	1.7413	0.0689		4.2664	6.1345	4.5204	6.2257	7.8499	6.0696
ENSMUSG00000040734	Ppp1r13l	1.7412	0.0048		8.5428	8.7623	8.1065	10.6618	10.4206	9.5526
ENSMUSG00000104140	Gm37140	1.7403	0.0066		2.5928	2.5278	2.671	4.326	4.6546	4.0319
ENSMUSG00000104913	Gm6560	1.7397	0.0025		4.8274	5.051	5.2158	6.6351	6.9005	6.7778
ENSMUSG00000095280	NA	1.7395	0.1547		4.1054	3.9527	5.019	5.806	4.3889	8.1007
ENSMUSG00000062232	Rapgef2	1.7389	0.0023		10.382	10.1913	10.4881	12.7135	11.7382	11.8264
ENSMUSG00000036432	Siah2	1.7383	0.0022		8.5623	8.181	8.7834	10.5417	9.7798	10.4202
ENSMUSG00000115505	Gm9247	1.7362	0.008		3.0117	3.0733	2.8396	4.3924	5.2032	4.5375
ENSMUSG00000039153	Runx2	1.7345	0.0116		5.1907	5.162	5.7898	7.4431	7.5408	6.3622
ENSMUSG00000042851	Zc3h6	1.7342	0.0761		7.5227	7.79	7.0606	10.6593	9.2119	7.7045
ENSMUSG00000021185	Dglucy	1.7327	0.0036		9.1831	8.4741	8.9699	10.8035	10.9756	10.046
ENSMUSG00000032020	Ubash3b	1.7321	0.0113		5.576	6.4726	7.0606	8.043	8.3629	7.8997
ENSMUSG00000117764	Gm50143	1.7319	0.0083		2.5928	2.2879	2.8396	3.9387	4.5279	4.4496
ENSMUSG00000026304	Rab17	1.7317	0.0135		6.4486	6.5963	5.9823	8.7161	8.2818	7.2245
ENSMUSG00000028982	Slc25a33	1.7312	0.0016		7.152	7.218	6.9635	8.5479	9.2093	8.7699
ENSMUSG00000098146	Gm26935	1.7308	0.0065		3.0117	3.6819	3.3669	5.248	5.1611	4.8438
ENSMUSG00000025329	Padi1	1.7306	0.1663		3.7167	6.1704	4.1229	7.3205	7.2609	4.6204
ENSMUSG00000025257	Ribc1	1.7298	0.0068		5.1907	5.833	5.705	7.8674	6.9508	7.1
ENSMUSG00000016356	Col20a1	1.7267	0.0207		3.9241	4.4951	4.2481	6.6757	5.0731	6.0988
ENSMUSG00000021453	Gadd45g	1.7258	0.0031		7.1826	7.9887	8.1065	9.4974	9.6771	9.2805
ENSMUSG00000037818	Abhd18	1.7252	0.0018		6.7367	7.0646	6.3743	8.4499	8.4442	8.4569
ENSMUSG00000076448	Mir763	1.7244	0.0103		2.5928	2.5278	3.4733	4.575	4.6546	4.5375
ENSMUSG00000108753	Gm45094	1.7221	0.0038		4.6635	4.2493	4.3068	6.151	6.2883	5.9465
ENSMUSG00000036036	Zfp57	1.7192	0.001		7.9945	8.3071	8.6222	9.95	9.9393	10.192
ENSMUSG00000100158	Gm28119	1.7191	0.0234		2.3266	3.2173	2.9906	4.1833	5.3603	4.1482
ENSMUSG00000029484	Anxa3	1.7187	0.0023		12.1237	11.7454	12.7433	13.7715	13.848	14.1492
ENSMUSG00000074340	Ovgp1	1.7124	0.0112		3.6006	4.3148	3.9121	5.6246	6.187	5.153
ENSMUSG00000097418	Mir155hg	1.7114	0.0065		4.6635	3.9527	4.8317	6.1888	6.0553	6.338
ENSMUSG00000030609	Aen	1.7101	0.0039		9.3541	8.8113	9.5676	11.5228	10.6462	10.6945
ENSMUSG00000048572	Tmem252	1.7082	0.0871		3.0117	2.5278	2.2599	4.7371	5.4329	2.7541
ENSMUSG00000025608	Podxl	1.7081	0.0047		9.845	10.7133	10.4066	12.351	12.3035	11.4347
ENSMUSG00000002791	Pdxk-ps	1.7076	0.0081		3.7167	3.579	3.3669	5.652	5.3603	4.7731
ENSMUSG00000010760	Phlda2	1.7075	0.0202		3.9241	3.6819	3.5724	5.731	6.0322	4.5375
ENSMUSG00000108732	2310043P16Rik	1.7066	0.0178		3.6006	3.6819	4.3632	5.731	4.879	6.1555
ENSMUSG00000026615	Eprs	1.7062	0.0008		12.5099	12.1188	12.7054	14.1405	13.9645	14.3477
ENSMUSG00000090173	Fbxw10	1.7062	0.0079		2.5928	3.2173	3.3669	4.8827	4.7141	4.6988
ENSMUSG00000039377	Hlx	1.7048	0.0036		5.4135	5.4219	6.0353	7.4034	7.1252	7.4565
ENSMUSG00000020758	Itgb4	1.7037	0.1512		10.3407	10.9475	8.3667	12.6212	12.2079	9.937
ENSMUSG00000075229	Ccdc58	1.7017	0.0019		9.505	9.6737	10.1501	11.6714	11.0496	11.713
ENSMUSG00000004952	Rasa4	1.7013	0.0828		3.7167	4.4951	4.5204	6.8153	6.6648	4.3559
ENSMUSG00000024049	Myom1	1.7004	0.0047		5.2689	5.3612	5.4937	7.5193	6.6497	7.0561
ENSMUSG00000029797	Sspo	1.6983	0.0716		3.336	3.868	3.252	6.4758	3.8673	5.2077
ENSMUSG00000084399	Gm15666	1.6982	0.0142		3.0117	2.5278	3.4733	4.326	5.1611	4.6204
ENSMUSG00000035109	Shc4	1.6964	0.0171		3.7167	4.3774	3.7522	6.3645	5.0731	5.498
ENSMUSG00000053641	Dennd4a	1.6954	0.0062		9.2664	8.7236	7.9904	10.6719	10.3225	10.072
ENSMUSG00000031450	Grk1	1.6944	0.0633		3.4743	2.5278	3.1272	6.0722	4.2351	3.9054
ENSMUSG00000110165	Btf3-ps18	1.6944	0.0092		2.5928	3.4682	2.9906	4.6311	4.5926	4.9112
ENSMUSG00000023883	Phf10	1.6933	0.0005		10.8952	10.7995	10.8686	12.2115	12.6339	12.7978
ENSMUSG00000087366	Junos	1.6922	0.0294		3.7167	3.6819	3.5724	6.314	5.2839	4.4496
ENSMUSG00000027955	Gask1b	1.6919	0.272		10.3632	7.2434	11.3192	11.773	9.6083	12.6201
ENSMUSG00000048065	Cyb5r2	1.6916	0.0116		4.1054	4.5506	3.4733	5.4794	6.1006	5.6239
ENSMUSG00000021214	Akr1c18	1.6875	0.0071		2.8174	2.7334	2.48	4.6311	4.314	4.1482
ENSMUSG00000097779	4833407H14Rik	1.6873	0.0734		3.7167	2.5278	2.2599	5.5967	4.5279	3.4417
ENSMUSG00000090207	4930524O07Rik	1.6858	0.0336		2.8174	3.6819	3.9121	4.685	4.7141	6.0696
ENSMUSG00000027808	Serp1	1.6851	0.0008		12.1052	11.9786	12.3492	13.8444	13.5243	14.1196
ENSMUSG00000085389	1700003M07Rik	1.6849	0.0779		2.8174	3.0733	2.671	5.5683	5.0269	3.0214
ENSMUSG00000029752	Asns	1.6831	0.0018		11.9877	11.1546	11.948	13.2946	13.3023	13.5427
ENSMUSG00000057335	Cep170	1.6827	0.0005		11.5056	11.159	11.3143	13.2508	12.9302	12.846
ENSMUSG00000017718	Afmid	1.6826	0.0027		5.6362	6.0016	5.9083	7.7895	7.5408	7.2637
ENSMUSG00000106310	Gm43523	1.6826	0.0418		4.1054	2.5278	4.1868	4.685	5.5997	5.5831
ENSMUSG00000107477	Gm44366	1.6778	0.0096		3.0117	3.579	3.6651	4.685	5.2441	5.3601
ENSMUSG00000024922	Ovol1	1.6768	0.2397		4.8782	6.8158	2.8396	6.8393	7.6284	5.0963
ENSMUSG00000020423	Btg2	1.6765	0.007		9.9377	10.0602	10.0907	12.5158	11.0682	11.5342
ENSMUSG00000097497	Gm26652	1.6765	0.0139		4.1881	4.8447	4.3068	5.4794	6.6798	6.21
ENSMUSG00000031886	Ces2e	1.6749	0.0124		2.5928	2.7334	2.2599	4.7371	3.9684	3.9054
ENSMUSG00000032648	Pygm	1.6743	0.009		5.2689	5.5634	5.3614	7.7709	6.7805	6.6652
ENSMUSG00000054520	Sh3bp2	1.6741	0.0084		7.0671	6.6224	8.0126	8.8754	8.8801	8.9688
ENSMUSG00000042686	Jph1	1.6707	0.0758		4.5429	3.0733	5.5188	6.2438	5.3603	6.5431
ENSMUSG00000111933	Gm36660	1.6707	0.0186		3.7167	3.0733	3.3669	5.652	5.1611	4.3559
ENSMUSG00000054720	Lrrc8c	1.6696	0.0288		8.9686	8.8394	7.4669	10.3835	10.5977	9.3027
ENSMUSG00000097354	2310001H17Rik	1.6691	0.0171		7.0561	7.0741	5.9083	8.9736	8.1642	7.9079
ENSMUSG00000029446	Psph	1.6686	0.0036		8.623	8.303	9.1064	9.9403	10.3356	10.7623
ENSMUSG00000002250	Ppard	1.6684	0.004		8.623	8.8751	8.4407	10.775	10.471	9.698
ENSMUSG00000000706	Btn1a1	1.6681	0.0231		2.5928	3.9527	2.9906	5.2117	4.879	4.4496
ENSMUSG00000115762	Gm34907	1.6573	0.0342		3.183	3.7779	2.48	5.5967	4.46	4.3559
ENSMUSG00000036019	Tmtc2	1.656	0.0096		8.8012	8.1182	9.3157	10.9879	10.1122	10.1029
ENSMUSG00000030353	Tead4	1.6538	0.0048		8.7201	8.2949	8.4731	10.691	10.2352	9.5233
ENSMUSG00000030587	2200002D01Rik	1.6536	0.0113		9.3247	9.4713	10.5555	10.9416	11.429	11.9417
ENSMUSG00000065904	Gm26109	1.6527	0.0058		3.7167	3.3482	3.9121	5.2834	5.2441	5.4076
ENSMUSG00000056735	A930024E05Rik	1.652	0.0041		5.576	6.2728	6.304	7.826	7.5408	7.742
ENSMUSG00000108053	Gm43890	1.6518	0.0055		5.9992	5.4801	6.0526	7.4817	7.1142	7.8913
ENSMUSG00000039782	Cpeb2	1.6486	0.0447		8.0342	8.1678	6.9635	10.4915	9.1022	8.5177
ENSMUSG00000105896	Gm43311	1.6469	0.0046		4.1881	4.1086	3.8344	5.5393	5.7206	5.8119
ENSMUSG00000047443	Erfe	1.6468	0.0146		5.7495	6.2562	5.9458	6.9203	8.386	7.5858
ENSMUSG00000074968	Ano3	1.6456	0.0614		5.1081	4.3774	4.056	7.2144	6.2883	4.9755
ENSMUSG00000029699	Ssc4d	1.6454	0.0041		6.5142	6.399	6.4015	7.6741	8.0007	8.5759
ENSMUSG00000106287	Gm43585	1.6449	0.0062		3.8241	3.9527	4.1868	5.3848	5.5353	5.9783
ENSMUSG00000044786	Zfp36	1.644	0.0039		8.198	7.8409	7.6819	9.8953	9.7535	9.004
ENSMUSG00000075014	Gm10800	1.642	0.132		6.5615	6.3529	7.36	7.8848	7.0464	10.2695
ENSMUSG00000029771	Irf5	1.6417	0.0201		3.0117	2.9133	3.9858	4.8358	4.5926	5.4076
ENSMUSG00000055725	Paqr3	1.6416	0.0008		7.2896	7.4175	7.5051	9.1943	8.9621	8.9807
ENSMUSG00000025064	Col17a1	1.6405	0.108		2.5928	2.5278	2.2599	5.2834	4.5926	2.4258
ENSMUSG00000047810	Ccdc88b	1.64	0.1412		3.0117	4.5506	4.1229	6.1888	6.6497	3.7668
ENSMUSG00000097921	Gm26576	1.6399	0.052		3.0117	2.5278	3.5724	5.5393	4.879	3.6134
ENSMUSG00000008318	Relt	1.6395	0.0107		5.5132	5.5084	6.5788	7.826	7.2708	7.4222
ENSMUSG00000078816	Prkcg	1.6373	0.0044		4.7748	4.3148	4.4176	6.2438	6.1659	6.0094
ENSMUSG00000112937	Gm17746	1.6371	0.012		3.336	2.7334	2.8396	5.0566	4.314	4.4496
ENSMUSG00000117123	Gm49890	1.637	0.0035		7.7977	7.9786	8.0258	9.1031	9.4964	10.1137
ENSMUSG00000010755	Cars	1.6359	0.0011		11.2754	10.7359	11.193	12.7367	12.9468	12.4286
ENSMUSG00000064193	Gm4735	1.6358	0.0082		4.3407	4.3774	3.9121	5.417	5.9104	6.21
ENSMUSG00000117648	Gm32282	1.6335	0.0139		2.8174	3.2173	2.2599	4.3924	4.6546	4.1482
ENSMUSG00000020439	Smtn	1.6324	0.0003		12.268	12.2412	12.4403	13.9171	13.8792	14.0503
ENSMUSG00000030095	Tmem43	1.6323	0.0014		11.1788	10.8306	11.5066	13.1057	12.7116	12.5957
ENSMUSG00000089849	Runx2os2	1.6277	0.0188		2.3266	2.2879	2.2599	4.6311	3.5129	3.6134
ENSMUSG00000025089	Gfra1	1.6264	0.2072		3.8241	4.972	3.252	6.8512	6.6344	3.4417
ENSMUSG00000054342	Kcnn4	1.6248	0.1701		3.0117	4.8447	2.8396	5.9003	6.2284	3.4417
ENSMUSG00000049128	Ivl	1.6247	0.0681		3.6006	2.7334	2.48	5.7815	3.7586	4.1482
ENSMUSG00000044017	Adgrd1	1.6222	0.0928		2.5928	3.2173	3.4733	5.8302	5.0731	3.2468
ENSMUSG00000026930	Gpsm1	1.6217	0.005		8.8966	9.304	9.6564	11.4467	10.8496	10.426
ENSMUSG00000106739	Gm43499	1.6216	0.0192		2.8174	2.2879	2.2599	3.749	4.7141	3.7668
ENSMUSG00000025069	Gsto2	1.6215	0.0061		3.6006	3.579	4.056	5.4794	5.3603	5.2603
ENSMUSG00000020593	Lpin1	1.6212	0.0278		9.4156	9.3319	9.6733	12.1116	11.1343	10.0385
ENSMUSG00000022364	Tbc1d31	1.6155	0.0021		9.3063	8.9999	8.7119	10.792	10.8586	10.2138
ENSMUSG00000029816	Gpnmb	1.6141	0.2659		4.8274	3.579	7.9356	7.379	6.0086	7.7965
ENSMUSG00000046959	Slc26a1	1.6139	0.0375		3.183	4.604	5.0537	5.806	5.7774	6.0988
ENSMUSG00000111058	Gm36033	1.6124	0.0047		4.5429	4.604	4.8317	6.4449	5.9847	6.3861
ENSMUSG00000102475	Gm37246	1.6116	0.0769		2.3266	2.2879	2.48	2.558	4.46	4.9112
ENSMUSG00000002107	Celf2	1.6108	0.0072		9.1931	9.6132	8.4986	10.9886	10.9199	10.2288
ENSMUSG00000015980	Lrrc27	1.6095	0.011		7.3891	6.9352	7.1754	9.5049	8.7081	8.115
ENSMUSG00000102349	Gm37376	1.6082	0.0405		2.5928	4.2493	4.1229	5.652	4.93	5.2077
ENSMUSG00000086719	Gm16275	1.6081	0.0202		3.336	2.5278	2.2599	3.9387	4.3889	4.6204
ENSMUSG00000117358	Gm31645	1.6054	0.0402		3.0117	3.6819	4.5204	4.7873	5.2032	6.0398
ENSMUSG00000116270	Gm1600	1.605	0.2303		3.336	3.579	2.2599	6.4911	5.0731	2.4258
ENSMUSG00000031700	Gpt2	1.6034	0.0005		9.535	9.6564	9.8784	11.217	11.4813	11.1819
ENSMUSG00000085589	A430078I02Rik	1.601	0.0213		3.9241	3.7779	4.3632	6.3479	4.9793	5.5412
ENSMUSG00000025403	Shmt2	1.6008	0.0016		12.1481	11.6601	12.1859	13.4759	13.3539	13.9668
ENSMUSG00000097183	Gm17501	1.5986	0.0922		4.2664	3.4682	5.683	5.318	5.8848	7.0107
ENSMUSG00000050721	Plekho2	1.5983	0.0043		7.4658	7.5043	8.3941	9.5087	9.3635	9.2869
ENSMUSG00000025140	Pycr1	1.5966	0.0031		7.4322	7.5113	7.5422	8.9951	8.7044	9.5762
ENSMUSG00000007589	Tinf2	1.5963	0.0016		9.4868	9.1375	9.7427	10.7766	11.3569	11.0225
ENSMUSG00000087684	1200007C13Rik	1.5954	0.0475		2.3266	2.9133	3.252	5.4486	4.0629	3.7668
ENSMUSG00000110730	Gm19385	1.5951	0.0436		2.3266	2.5278	3.3669	4.9723	4.5926	3.4417
ENSMUSG00000098433	Mir6391	1.5946	0.0357		2.5928	2.7334	2.8396	3.4076	4.3889	5.153
ENSMUSG00000104342	Gm36401	1.594	0.0045		5.722	5.2978	5.9272	7.4034	7.0113	7.3143
ENSMUSG00000044937	Ttc41	1.592	0.0384		5.8546	5.6673	5.6606	8.4884	6.5224	6.9479
ENSMUSG00000107879	9330102E08Rik	1.5889	0.0607		4.2664	3.7779	3.7522	6.6074	5.5997	4.3559
ENSMUSG00000042734	Ttc9	1.5886	0.0072		7.2612	7.5043	7.4925	9.3549	9.3727	8.2961
ENSMUSG00000031453	Rasa3	1.588	0.0054		8.4154	8.4524	8.6593	10.4306	10.458	9.4026
ENSMUSG00000037400	Atp11b	1.5866	0.0031		10.7367	10.4887	10.0013	12.275	12.16	11.5515
ENSMUSG00000037999	Arap2	1.5861	0.0033		9.1704	9.0845	8.9424	11.2498	10.3237	10.3821
ENSMUSG00000019301	Hsd17b1	1.5841	0.0738		3.336	4.0328	4.1229	6.7021	4.3889	5.153
ENSMUSG00000102148	Gm38059	1.5821	0.1274		3.183	3.2173	2.9906	5.015	6.1006	3.0214
ENSMUSG00000023905	Tnfrsf12a	1.5819	0.0073		11.4049	11.2276	12.4069	13.4324	12.9172	13.4354
ENSMUSG00000110393	Gm36445	1.5803	0.0115		5.9287	5.642	5.2758	7.7646	7.1576	6.6652
ENSMUSG00000001870	Ltbp1	1.5799	0.0127		10.5061	10.4336	11.8338	12.7015	12.5783	12.2334
ENSMUSG00000024386	Proc	1.5793	0.0384		3.9241	4.6554	4.6621	6.8512	6.0322	5.0963
ENSMUSG00000022639	Dubr	1.5778	0.0094		9.3497	8.9284	8.5722	11.1887	9.9393	10.4559
ENSMUSG00000035834	Polr3g	1.577	0.0013		8.1211	7.6574	8.179	9.4631	9.5442	9.6812
ENSMUSG00000116498	Gm38563	1.576	0.0179		3.0117	2.9133	3.7522	4.685	4.46	5.2603
ENSMUSG00000089239	Gm22200	1.5747	0.0213		3.4743	3.868	4.2481	5.4486	4.8261	6.0398
ENSMUSG00000026343	Gpr39	1.5743	0.0034		9.3808	8.9362	9.0168	11.1968	10.2566	10.6033
ENSMUSG00000101037	Gm28424	1.5735	0.0054		4.5429	4.4951	4.947	6.0311	6.2883	6.3861
ENSMUSG00000020484	Xbp1	1.573	0.0005		10.7212	10.9839	10.7729	12.2689	12.2804	12.6475
ENSMUSG00000035179	Ppp1r32	1.573	0.0176		3.4743	3.579	3.3669	5.248	5.5353	4.3559
ENSMUSG00000022508	Bcl6	1.5682	0.0097		8.6598	8.8477	8.1147	10.639	10.2678	9.4201
ENSMUSG00000109299	Gm45164	1.5677	0.0216		2.5928	2.5278	2.8396	4.9282	3.9684	3.7668
ENSMUSG00000052566	Hook2	1.5664	0.0011		8.9271	9.4386	8.9072	10.5716	10.8203	10.5802
ENSMUSG00000030257	Srgap3	1.566	0.0519		9.0511	8.856	7.3107	10.8255	9.679	9.4114
ENSMUSG00000056771	Gm10010	1.5658	0.0487		3.8241	3.9527	3.7522	6.5792	5.0269	4.6204
ENSMUSG00000011632	Pinlyp	1.5655	0.0354		3.9241	3.9527	3.3669	5.9229	5.6614	4.3559
ENSMUSG00000055723	Rras2	1.5649	0.0003		11.953	11.8958	12.0445	13.3987	13.5635	13.6256
ENSMUSG00000085665	Gm12059	1.561	0.0629		4.1054	2.9133	3.7522	6.2617	4.6546	4.5375
ENSMUSG00000097027	Gm26559	1.5609	0.005		4.5429	4.6554	4.8712	6.3972	6.3458	6.0094
ENSMUSG00000037362	Ccn3	1.5605	0.148		3.183	2.7334	4.947	6.4449	4.0629	5.0372
ENSMUSG00000022565	Plec	1.5564	0.0036		13.8359	14.1991	13.8564	15.7988	15.7574	15.0044
ENSMUSG00000033618	Map3k13	1.5561	0.0234		6.0219	6.4726	5.4682	8.2585	7.4736	6.8989
ENSMUSG00000021798	Ldb3	1.5556	0.0533		2.8174	3.3482	2.671	5.5967	3.7586	4.1482
ENSMUSG00000029576	Radil	1.5549	0.0232		2.8174	2.9133	3.1272	3.749	4.93	4.8438
ENSMUSG00000042292	Mrtfa	1.5543	0.0046		10.7028	10.6865	10.144	12.4911	12.2021	11.5031
ENSMUSG00000024186	Rgs11	1.5532	0.0711		4.3407	6.0016	3.8344	6.2438	6.7805	5.8119
ENSMUSG00000040554	Aipl1	1.5529	0.0215		3.183	3.7779	3.9121	5.806	5.0269	4.6988
ENSMUSG00000048482	Bdnf	1.5527	0.0046		7.3266	7.447	7.9168	9.0957	8.719	9.534
ENSMUSG00000017314	Mpp2	1.5525	0.0045		9.3452	9.4331	8.6734	10.8858	10.9733	10.2501
ENSMUSG00000041301	Cftr	1.5522	0.0922		4.3407	3.2173	5.5434	6.2074	5.1178	6.4327
ENSMUSG00000001131	Timp1	1.5516	0.0041		8.1105	7.9376	8.9001	9.7493	9.8707	9.9828
ENSMUSG00000027340	Slc23a2	1.5515	0.0024		9.5682	9.7273	9.3666	11.5544	11.0809	10.6813
ENSMUSG00000107286	Gm43788	1.5512	0.0757		3.183	4.3774	4.5692	4.4559	6.1445	6.183
ENSMUSG00000009654	Oit3	1.5504	0.0738		5.694	4.0328	6.23	7.4969	6.5057	6.6054
ENSMUSG00000018143	Mafk	1.55	0.0018		9.4004	9.4294	9.6705	11.4975	10.7475	10.9055
ENSMUSG00000086638	4930405A21Rik	1.5498	0.0265		2.8174	3.579	3.9858	4.8358	4.6546	5.5412
ENSMUSG00000053007	Creb5	1.5488	0.0235		9.7202	9.7992	9.173	12.1152	10.8092	10.4144
ENSMUSG00000044499	Hs3st5	1.5487	0.07		3.0117	2.2879	2.8396	4.7371	5.0269	3.0214
ENSMUSG00000049878	Rlf	1.5487	0.0008		10.3951	10.6441	10.164	12.1091	11.9859	11.7543
ENSMUSG00000023088	Abcc1	1.5485	0.0008		12.2819	12.2034	11.8853	13.7835	13.8097	13.4228
ENSMUSG00000002257	Def6	1.5483	0.0095		3.6006	4.0328	3.7522	5.731	5.2032	5.0963
ENSMUSG00000003873	Bax	1.5476	0.0015		9.4745	9.312	9.8784	11.4081	10.9246	10.975
ENSMUSG00000024533	Spire1	1.5461	0.0011		9.3109	8.7971	8.9493	10.7913	10.4372	10.4671
ENSMUSG00000029993	Nfu1	1.5437	0.0017		10.0063	9.6721	10.2895	11.2227	11.5924	11.7838
ENSMUSG00000085747	Slc13a2os	1.5414	0.1607		4.9746	6.648	7.2142	6.909	7.1789	9.3731
ENSMUSG00000015962	1700016C15Rik	1.5411	0.0324		2.8174	2.9133	3.5724	4.7371	5.2839	3.9054
ENSMUSG00000026663	Atf6	1.541	0.0025		10.8323	10.502	10.6061	12.6919	11.8085	12.0629
ENSMUSG00000021171	Esyt2	1.5406	0.0043		11.5537	11.7263	11.3605	13.2564	13.5282	12.4777
ENSMUSG00000020183	Cpm	1.5399	0.113		6.764	7.9634	5.5188	8.7449	8.8963	7.2245
ENSMUSG00000021585	Cast	1.5399	0.0023		11.4475	11.2618	11.1798	13.2557	12.8891	12.3639
ENSMUSG00000103251	Gm37519	1.5393	0.0215		3.183	2.9133	3.3669	4.1833	5.3603	4.5375
ENSMUSG00000024843	Chka	1.5392	0.0022		12.7299	12.7337	12.2061	14.409	14.1317	13.7466
ENSMUSG00000087445	Gm14286	1.5387	0.0194		4.1054	4.5506	4.1229	6.314	5.9847	5.0963
ENSMUSG00000027438	Napb	1.5385	0.0007		8.0117	7.8575	8.0688	9.5691	9.4425	9.542
ENSMUSG00000031824	6430548M08Rik	1.5378	0.0193		6.8681	7.5043	6.6024	9.2779	8.3536	7.9566
ENSMUSG00000046731	Kctd11	1.537	0.0091		8.2852	8.4954	8.5572	9.2174	10.2174	10.514
ENSMUSG00000118068	Gm50275	1.5352	0.0129		2.8174	3.6819	3.4733	4.7371	4.93	4.9112
ENSMUSG00000059060	Rad51b	1.5333	0.0049		6.1306	6.0016	6.6141	7.8674	7.9888	7.4899
ENSMUSG00000044813	Shb	1.5322	0.0007		10.9181	11.1281	10.6912	12.6709	12.3141	12.3492
ENSMUSG00000005514	Por	1.5311	0.0049		11.0233	10.9989	10.6322	12.9228	12.5089	11.816
ENSMUSG00000091712	Sec14l5	1.5299	0.1634		3.183	2.7334	2.8396	6.1317	4.46	2.7541
ENSMUSG00000029201	Ugdh	1.5287	0.0029		12.2233	11.6774	11.5031	13.5372	13.5072	12.9455
ENSMUSG00000096948	Gm4221	1.5282	0.0318		3.0117	3.4682	4.5204	4.9282	5.2032	5.4535
ENSMUSG00000042807	Hecw2	1.5271	0.0653		3.0117	3.0733	2.8396	5.015	5.2441	3.2468
ENSMUSG00000063406	Tmed5	1.526	0.0006		10.6026	10.2065	10.4625	12.1149	11.8973	11.8373
ENSMUSG00000030738	Eif3c	1.5254	0.0005		13.0297	12.9689	12.844	14.4528	14.6054	14.3607
ENSMUSG00000045813	Gm9801	1.5254	0.0206		3.183	4.4375	3.7522	5.3848	5.4678	5.0963
ENSMUSG00000042650	Alkbh5	1.5241	0.012		12.5077	13.0408	11.8979	14.458	14.1164	13.4442
ENSMUSG00000051379	Flrt3	1.5237	0.0354		6.8554	6.7223	8.4276	8.6154	8.6934	9.2677
ENSMUSG00000026014	Raph1	1.5226	0.0284		9.8226	9.5138	8.7912	11.5439	11.1922	9.9591
ENSMUSG00000021998	Lcp1	1.522	0.0154		3.7167	3.579	4.3068	5.7815	4.9793	5.4076
ENSMUSG00000032332	Col12a1	1.5213	0.3103		6.251	5.642	9.8528	8.1855	8.0067	10.1173
ENSMUSG00000017418	Arl5b	1.5201	0.0044		10.054	10.1638	10.0505	12.2181	11.5083	11.1021
ENSMUSG00000107355	AI839979	1.5188	0.0131		4.4113	5.3918	4.947	6.7021	6.5057	6.0988
ENSMUSG00000033307	Mif	1.5187	0.0022		12.0998	12.4912	12.7241	13.9426	13.6605	14.2682
ENSMUSG00000030104	Edem1	1.5149	0.0014		11.3064	10.9775	11.1935	13.0665	12.436	12.5198
ENSMUSG00000043051	Disc1	1.5143	0.0211		3.4743	3.7779	3.7522	5.8539	5.0731	4.6204
ENSMUSG00000063531	Sema3e	1.5132	0.0087		11.1674	10.0554	11.0261	12.6684	12.1465	11.9736
ENSMUSG00000024610	Cd74	1.513	0.0283		2.5928	3.0733	2.2599	3.5306	4.314	4.6204
ENSMUSG00000102258	Gm38257	1.512	0.0177		5.1907	5.6673	4.5692	6.2438	7.0348	6.6846
ENSMUSG00000029009	Mthfr	1.5118	0.0006		8.9028	8.867	8.8712	10.3639	10.2453	10.5672
ENSMUSG00000032502	Stac	1.5104	0.0366		2.3266	2.7334	2.2599	4.7371	3.8673	3.2468
ENSMUSG00000020248	Nfyb	1.5097	0.0029		10.1857	10.0721	10.3022	12.2286	11.5684	11.2918
ENSMUSG00000114515	Aldoa	1.5086	0.004		5.9526	6.1879	6.4149	7.6335	7.4992	7.9486
ENSMUSG00000005883	Spo11	1.5078	0.0281		3.7167	3.2173	3.8344	4.326	5.4678	5.498
ENSMUSG00000093424	6330562C20Rik	1.5072	0.0234		4.7202	5.1259	4.7912	6.6757	5.5679	6.9154
ENSMUSG00000029552	Tes	1.5049	0.0006		11.2878	11.6097	11.6819	12.9216	13.052	13.1205
ENSMUSG00000110218	Tincr	1.5019	0.0447		3.7167	4.1806	3.3669	6.2257	4.7712	4.7731
ENSMUSG00000001119	Col6a1	1.5013	0.0515		4.6635	5.4219	6.3183	7.2327	7.465	6.21
ENSMUSG00000071456	1110002L01Rik	1.5006	0.0021		7.4741	7.395	7.4925	8.6833	8.9122	9.2677
ENSMUSG00000084797	Gm14321	1.5006	0.0089		5.3064	5.6673	5.1531	7.3375	6.5874	6.7037
ENSMUSG00000086993	Rsf1os2	1.4992	0.0173		4.0176	3.4682	3.9121	5.3848	4.7712	5.7396
ENSMUSG00000050106	Tmc8	1.4989	0.0348		4.4113	4.4375	3.7522	6.4911	5.6309	4.9755
ENSMUSG00000087633	Gm14455	1.4984	0.0179		2.3266	2.9133	2.9906	4.6311	4.0629	4.0319
ENSMUSG00000029762	Akr1b8	1.4981	0.0022		7.8995	7.755	8.1986	9.2691	9.757	9.3214
ENSMUSG00000027353	Mcm8	1.4961	0.0008		8.519	8.6494	8.6251	10.1952	10.2199	9.8666
ENSMUSG00000004791	Pgf	1.4958	0.0693		2.3266	3.2173	2.9906	4.1833	5.397	3.4417
ENSMUSG00000035890	Rnf126	1.4953	0.0006		10.3248	10.2584	10.4794	11.7862	11.6788	12.0836
ENSMUSG00000025025	Mxi1	1.4952	0.0227		10.1461	11.1183	9.6816	12.0068	12.2243	11.2005
ENSMUSG00000045211	Nudt18	1.4946	0.0741		7.1102	7.8629	6.0865	9.3019	8.7081	7.5333
ENSMUSG00000079242	C730034F03Rik	1.494	0.0061		4.4786	4.5506	4.4699	5.9672	5.7774	6.2365
ENSMUSG00000087593	Gm16174	1.4937	0.009		5.2689	5.1971	5.8892	6.5934	7.1142	7.1286
ENSMUSG00000018076	Med13l	1.4932	0.004		9.8625	10.0178	9.6047	11.6834	11.5188	10.7623
ENSMUSG00000065422	Mir221	1.4931	0.0419		3.336	4.0328	4.7494	4.9282	5.5997	6.0696
ENSMUSG00000026199	Ankzf1	1.4924	0.0022		8.7747	9.2589	9.0124	10.8255	10.1651	10.5328
ENSMUSG00000026548	Slamf9	1.4915	0.0103		5.065	4.7051	5.3889	6.6757	6.1445	6.8135
ENSMUSG00000028642	Tmem269	1.4887	0.0233		2.5928	3.3482	2.2599	4.4559	4.0629	4.1482
ENSMUSG00000068739	Sars	1.4877	0.0026		12.1296	11.6387	12.4232	13.4312	13.3968	13.8267
ENSMUSG00000047496	Rnf152	1.4869	0.132		5.4807	5.2978	2.9906	6.6757	6.1006	5.4535
ENSMUSG00000022306	Zfpm2	1.4868	0.0311		6.817	7.9428	6.879	8.5587	9.4469	8.0934
ENSMUSG00000026994	Galnt3	1.4865	0.1074		8.1677	7.6762	6.4149	9.6426	9.49	7.5858
ENSMUSG00000028158	Mttp	1.4856	0.0123		7.2322	7.3566	7.6984	9.6081	8.3301	8.8058
ENSMUSG00000087574	C030037D09Rik	1.4855	0.0049		6.192	6.2053	6.7043	8.1331	7.6284	7.7965
ENSMUSG00000097360	9430065F17Rik	1.4844	0.0191		4.1881	4.3148	4.6621	5.2117	6.3077	6.0988
ENSMUSG00000055407	Map6	1.484	0.0017		9.297	9.2898	9.2517	11.0952	10.8312	10.3642
ENSMUSG00000060594	Layn	1.4838	0.0175		6.6949	6.1525	6.8692	7.5487	8.7619	7.8576
ENSMUSG00000053706	B430305J03Rik	1.4829	0.0219		3.9241	3.868	3.9858	6.151	4.9793	5.0963
ENSMUSG00000098055	Gm26947	1.4823	0.0304		2.8174	2.7334	2.671	4.4559	4.7712	3.4417
ENSMUSG00000024301	Kifc5b	1.481	0.0022		8.8465	8.5677	8.5901	10.3691	10.3356	9.7426
ENSMUSG00000097146	Gm4211	1.4803	0.0484		2.5928	2.5278	2.2599	4.7371	4.0629	3.0214
ENSMUSG00000078967	Gapdh-ps16	1.4802	0.0053		6.5142	5.877	6.1197	7.4273	7.6665	7.8576
ENSMUSG00000034591	Slc41a2	1.479	0.0108		8.0117	7.2767	7.3178	9.5993	8.6292	8.8146
ENSMUSG00000041096	Tspyl2	1.4788	0.0013		7.9888	8.1898	8.3459	9.8204	9.4447	9.6956
ENSMUSG00000035929	H2-Q4	1.4784	0.0249		6.0443	5.7643	6.7151	8.3195	7.0231	7.6164
ENSMUSG00000045467	Ttll13	1.4763	0.021		3.8241	4.7051	3.9858	6.151	5.4329	5.3601
ENSMUSG00000041028	Ghitm	1.4759	0.0013		12.1873	12.1096	11.9425	13.8416	13.6109	13.2148
ENSMUSG00000050035	Fhl4	1.4754	0.0327		4.4786	4.9308	5.5434	7.0799	5.7774	6.5217
ENSMUSG00000035828	Pim3	1.4751	0.0036		10.2748	10.4958	9.9213	11.8741	12.0183	11.2247
ENSMUSG00000020359	Phykpl	1.475	0.0016		8.0674	7.8575	8.1593	9.2757	9.4815	9.7519
ENSMUSG00000082082	Gm13230	1.4738	0.0103		5.6362	4.972	5.5188	6.6351	6.6497	7.2637
ENSMUSG00000098068	Gm7909	1.4737	0.0343		2.5928	3.6819	2.8396	4.1063	5.0731	4.3559
ENSMUSG00000007655	Cav1	1.4733	0.004		11.6436	11.0205	10.5929	12.5255	12.6303	12.5211
ENSMUSG00000034667	Xpot	1.4718	0.0017		11.8724	11.4885	11.9335	13.3288	12.8971	13.4838
ENSMUSG00000003500	Impdh1	1.4616	0.0005		9.6797	9.8162	9.8515	11.2764	11.3428	11.1129
ENSMUSG00000078776	9530053A07Rik	1.4612	0.0438		6.8806	7.7372	7.325	9.8561	8.3061	8.1642
ENSMUSG00000000184	Ccnd2	1.461	0.0337		3.6006	3.9527	3.5724	5.8302	5.3226	4.3559
ENSMUSG00000104156	Gm38102	1.4608	0.0209		4.1881	3.579	4.056	5.248	4.9793	5.9783
ENSMUSG00000009291	Pttg1ip	1.4578	0.0006		11.9659	12.0216	12.2778	13.6277	13.6289	13.382
ENSMUSG00000108414	Snhg1	1.4564	0.0035		10.7203	11.1613	11.6697	12.5081	12.605	12.8075
ENSMUSG00000020766	Galk1	1.4556	0.0026		10.5846	10.9857	11.0696	12.02	12.2414	12.7454
ENSMUSG00000053192	Mllt11	1.4538	0.0037		7.6376	7.6824	7.7939	8.7225	9.2349	9.5179
ENSMUSG00000022296	Baalc	1.4531	0.0266		4.7202	4.4375	5.5188	6.8629	5.8848	6.2881
ENSMUSG00000062127	Cttnbp2nl	1.4528	0.0006		10.8649	10.5864	10.9635	12.1645	12.2053	12.4036
ENSMUSG00000032035	Ets1	1.4527	0.0094		11.2534	11.1905	11.8462	13.5346	12.6997	12.4138
ENSMUSG00000035530	Eif1	1.4523	0.0682		12.3277	12.2499	10.916	14.004	13.6451	12.2014
ENSMUSG00000085776	5430402O13Rik	1.4523	0.0354		3.0117	3.0733	4.3632	4.8827	4.8261	5.0963
ENSMUSG00000070806	Zmynd12	1.4514	0.0201		3.336	4.1086	3.6651	4.685	5.4678	5.3111
ENSMUSG00000056216	Cebpg	1.4506	0.0005		10.8937	10.7618	10.7313	12.3001	12.0743	12.3643
ENSMUSG00000108486	Gm44836	1.4483	0.008		4.6045	4.1086	4.3068	5.652	5.8321	5.8808
ENSMUSG00000045102	Poln	1.4464	0.0159		3.336	4.0328	3.6651	4.7873	5.4329	5.153
ENSMUSG00000027901	Dennd2d	1.4457	0.0726		4.2664	4.5506	3.7522	6.0923	6.3645	4.4496
ENSMUSG00000032902	Slc16a1	1.4434	0.0012		11.2647	10.7247	11.3098	12.604	12.5133	12.512
ENSMUSG00000097749	Gm16938	1.4419	0.0171		3.4743	3.4682	4.1868	5.318	4.8261	5.3111
ENSMUSG00000021747	Cfap20dc	1.4417	0.1655		6.3441	6.0978	4.4176	7.6128	7.9888	5.5831
ENSMUSG00000044224	Dnajc21	1.4408	0.0007		9.5701	9.2979	9.3974	10.7171	10.9944	10.8762
ENSMUSG00000038517	Tbkbp1	1.4404	0.0475		3.0117	3.9527	3.4733	5.7815	4.5279	4.4496
ENSMUSG00000038776	Ephx1	1.4393	0.0012		12.1955	11.7338	11.7968	13.5052	13.3992	13.1398
ENSMUSG00000078651	Aoc2	1.4391	0.0036		6.764	7.1478	7.1273	8.446	8.1958	8.7144
ENSMUSG00000029814	Igf2bp3	1.439	0.0826		2.5928	2.5278	3.7522	5.417	3.8673	3.9054
ENSMUSG00000037112	Sik2	1.4386	0.0045		10.3225	10.2479	10.1084	11.8842	12.0402	11.0702
ENSMUSG00000028599	Tnfrsf1b	1.4378	0.0111		8.8655	8.506	9.1828	10.5224	10.7359	9.6095
ENSMUSG00000023805	Synj2	1.4377	0.0212		7.3447	7.235	6.6599	8.7096	9.0826	7.7604
ENSMUSG00000112301	Gm10752	1.4374	0.0204		3.0117	3.3482	3.5724	4.9723	4.2351	5.0372
ENSMUSG00000086680	Gm11592	1.4369	0.0211		3.7167	2.9133	3.1272	4.685	5.0269	4.3559
ENSMUSG00000087624	9230111E07Rik	1.4363	0.0073		4.6045	4.3774	4.3632	5.806	5.7493	6.0988
ENSMUSG00000074141	Il4i1	1.4356	0.0192		6.1513	5.9407	6.0526	7.7709	7.9767	6.7037
ENSMUSG00000020080	Hkdc1	1.4352	0.1428		6.3441	6.6224	5.683	9.1638	7.5813	6.21
ENSMUSG00000092300	Cdk3	1.4352	0.011		4.7202	5.3298	4.8317	6.2793	6.7525	6.1555
ENSMUSG00000045795	Whamm	1.4351	0.0029		8.0454	8.1941	7.6253	9.4573	9.5726	9.1401
ENSMUSG00000097304	Rpl31-ps15	1.4343	0.061		4.6635	4.3774	5.5188	7.2052	5.5019	6.1555
ENSMUSG00000107881	Gm44250	1.4342	0.0608		7.2612	6.1879	6.0697	8.8899	7.8028	7.1286
ENSMUSG00000040329	Il7	1.4323	0.0527		2.8174	2.9133	3.9121	5.097	3.8673	4.9755
ENSMUSG00000085054	Gm15834	1.4312	0.0218		4.0176	4.5506	4.9096	5.4486	5.9847	6.338
ENSMUSG00000032114	Slc37a4	1.4309	0.0096		8.2992	9.2485	8.2178	10.2886	10.0645	9.7052
ENSMUSG00000034248	Slc25a37	1.4294	0.0041		8.7612	8.9569	8.8217	10.3113	10.7287	9.7882
ENSMUSG00000000567	Sox9	1.4278	0.0652		9.3109	8.8394	8.0603	10.8486	10.6337	9.0117
ENSMUSG00000035629	Rubcn	1.4275	0.0008		10.8499	11.0717	10.7539	12.4892	12.3703	12.0985
ENSMUSG00000086370	Ftx	1.4232	0.0114		5.4807	5.8552	6.0865	7.5988	6.7666	7.3267
ENSMUSG00000024854	Pold4	1.4224	0.0096		7.152	7.539	7.1595	8.9978	9.0338	8.0862
ENSMUSG00000038780	Smurf1	1.4209	0.0007		10.9014	11.0604	10.9041	12.5726	12.4006	12.1557
ENSMUSG00000022742	Cpox	1.4195	0.0009		10.2119	10.0361	10.4266	11.713	11.434	11.7861
ENSMUSG00000024776	Stambpl1	1.4194	0.0013		8.5388	8.2071	8.233	9.6443	9.9189	9.674
ENSMUSG00000085886	D030047H15Rik	1.4186	0.0262		3.183	3.2173	4.056	4.575	4.8261	5.3111
ENSMUSG00000113029	Gm40578	1.4172	0.0307		2.8174	3.3482	3.9858	4.8358	5.1178	4.4496
ENSMUSG00000036136	Fam110c	1.4153	0.0083		5.2689	5.7876	5.7691	6.9646	7.329	6.7778
ENSMUSG00000048997	Atxn7l2	1.4152	0.0081		7.8747	7.9114	8.3736	9.2823	9.0826	10.0404
ENSMUSG00000096751	Gm28373	1.4147	0.0336		4.7202	4.2493	3.7522	5.1362	6.2883	5.5412
ENSMUSG00000085771	C230066G23Rik	1.4139	0.061		2.8174	2.7334	2.9906	3.847	5.3226	3.6134
ENSMUSG00000031523	Dlc1	1.4132	0.1618		3.9241	4.5506	5.1207	4.2564	6.8747	6.7037
ENSMUSG00000035293	G2e3	1.4084	0.001		10.779	10.5125	10.5326	12.1757	12.1401	11.7335
ENSMUSG00000082515	Gm12902	1.4075	0.0269		3.8241	3.7779	2.8396	4.8827	5.1611	4.6204
ENSMUSG00000024587	Nars	1.4073	0.0036		12.6715	11.9441	12.6651	13.7885	13.6466	14.0675
ENSMUSG00000087153	Gm6483	1.4068	0.0041		6.6223	6.2053	6.1837	7.8379	7.7182	7.6758
ENSMUSG00000112368	Gm49376	1.4057	0.0113		4.8274	4.7532	4.1868	6.17	5.805	6.0094
ENSMUSG00000025880	Smad7	1.4052	0.0048		9.9804	9.9967	10.8038	11.5046	11.5507	11.9412
ENSMUSG00000031585	Gtf2e2	1.4045	0.0022		9.1133	9.238	9.1126	10.4257	10.9725	10.2791
ENSMUSG00000027323	Rad51	1.4028	0.0689		9.638	9.1886	8.1986	11.1045	10.78	9.349
ENSMUSG00000005686	Ampd3	1.4009	0.0062		11.3989	11.6214	10.5418	12.6682	12.5695	12.5272
ENSMUSG00000020424	Castor1	1.4004	0.0435		6.326	6.9247	5.9641	7.7265	8.6484	7.0411
ENSMUSG00000036492	Rnf39	1.3988	0.0024		7.4151	7.6637	7.6763	9.0084	8.7478	9.1952
ENSMUSG00000060716	Plekhh1	1.3984	0.0009		9.1396	9.5225	9.2721	10.7797	10.6105	10.7393
ENSMUSG00000074578	Zfas1	1.3956	0.0155		9.8095	10.5881	10.5008	11.0112	11.8509	12.2231
ENSMUSG00000097785	B230217O12Rik	1.395	0.021		3.7167	4.2493	3.7522	4.8827	5.2441	5.7762
ENSMUSG00000030554	Synm	1.3948	0.0508		6.8929	7.5526	6.2895	8.8609	8.6598	7.3989
ENSMUSG00000100747	1700084E18Rik	1.3945	0.0119		3.7167	3.9527	4.1868	5.097	5.5353	5.4076
ENSMUSG00000102813	Gm37795	1.3937	0.0068		6.3798	6.3373	6.8692	7.6404	7.902	8.225
ENSMUSG00000035640	Cbarp	1.3929	0.0073		7.9596	8.4415	7.4988	9.3339	9.6258	9.1189
ENSMUSG00000028212	Ccne2	1.3926	0.0343		10.407	9.8703	10.6739	12.6886	11.3748	11.0656
ENSMUSG00000097313	Gm26569	1.3925	0.016		4.2664	4.604	4.4699	6.3479	5.4678	5.7021
ENSMUSG00000024201	Kdm4b	1.3898	0.0163		10.0947	11.0587	9.8304	11.9422	11.9535	11.2575
ENSMUSG00000085006	BC021767	1.3894	0.014		3.7167	3.2173	3.4733	4.9282	5.0269	4.6204
ENSMUSG00000030254	Rad18	1.3888	0.0037		10.2629	9.4587	10.0201	11.5585	11.2059	11.1439
ENSMUSG00000041245	Wnk3	1.388	0.0093		4.1881	4.0328	4.3632	5.3848	5.6614	5.7021
ENSMUSG00000117013	Gm30531	1.3863	0.0483		2.5928	3.4682	2.9906	4.326	5.1178	3.7668
ENSMUSG00000088015	Mir1932	1.386	0.0211		3.183	2.5278	2.671	3.9387	4.1515	4.4496
ENSMUSG00000109719	Gm45266	1.3857	0.0482		3.0117	3.7779	3.9121	4.1833	5.4678	5.2077
ENSMUSG00000056671	Prelid2	1.3837	0.0194		3.183	2.9133	2.8396	4.7873	4.1515	4.1482
ENSMUSG00000020275	Rel	1.3832	0.0681		8.2129	7.9061	7.36	10.2522	9.24	8.1363
ENSMUSG00000033021	Gmppa	1.3832	0.0013		9.173	9.446	9.6149	10.7187	10.6614	11.0033
ENSMUSG00000041040	Fam117b	1.383	0.0032		10.0289	10.1913	9.7104	11.4843	11.6511	10.9442
ENSMUSG00000027858	Tspan2	1.3824	0.0694		2.8174	3.0733	2.9906	5.3518	4.2351	3.4417
ENSMUSG00000026317	Cln8	1.3817	0.0081		9.957	9.8758	9.1591	11.4428	11.0845	10.6096
ENSMUSG00000103731	Gm17530	1.3812	0.0252		2.3266	2.9133	2.9906	4.4559	4.1515	3.7668
ENSMUSG00000023043	Krt18	1.3811	0.0019		13.0525	13.2165	13.5031	14.6991	14.8256	14.3906
ENSMUSG00000022253	Nadk2	1.3804	0.0035		10.1957	10.6265	9.9641	11.7494	11.8848	11.2934
ENSMUSG00000018995	Nars2	1.379	0.0019		8.006	7.7726	8.2667	9.4239	9.4248	9.3337
ENSMUSG00000038037	Socs1	1.3787	0.0124		4.2664	3.7779	4.1229	5.3518	5.6913	5.2603
ENSMUSG00000054871	Tmem158	1.3785	0.018		4.8782	5.5361	4.5692	6.314	6.6497	6.1555
ENSMUSG00000004872	Pax3	1.3778	0.0145		4.1054	3.6819	4.056	5.5683	5.4329	4.9755
ENSMUSG00000002043	Trappc6a	1.3773	0.0048		8.9861	9.9199	9.724	11.0341	10.904	10.8237
ENSMUSG00000025324	Atp10a	1.3764	0.0027		8.424	8.081	8.7065	9.9348	9.62	9.7859
ENSMUSG00000103593	Gm37352	1.3751	0.0011		8.1158	8.3546	8.3598	9.5709	9.6771	9.7075
ENSMUSG00000026796	Niban2	1.3736	0.0025		11.8467	12.1429	12.2335	13.528	13.741	13.0749
ENSMUSG00000104684	5430427N15Rik	1.3729	0.0799		3.336	3.3482	2.671	5.318	4.7141	3.4417
ENSMUSG00000103899	Gm37940	1.3725	0.0076		5.343	5.3298	4.8712	6.5211	6.6189	6.5217
ENSMUSG00000098090	2700099C18Rik	1.372	0.0016		7.8872	7.8464	7.8444	9.1614	9.4314	9.101
ENSMUSG00000046111	Cep295	1.3714	0.0037		10.4611	10.1118	9.7911	11.7679	11.5629	11.1474
ENSMUSG00000024516	Sec11c	1.371	0.0049		9.218	8.5372	9.3031	10.6483	10.1409	10.3821
ENSMUSG00000028132	Tlcd4	1.3707	0.097		4.3407	4.6554	2.8396	5.417	5.9104	4.6204
ENSMUSG00000024381	Bin1	1.3693	0.0039		8.5739	8.8113	9.2442	9.9292	10.3579	10.4503
ENSMUSG00000111594	Gm3365	1.3689	0.0091		5.576	5.265	5.7267	6.7786	7.2307	6.6652
ENSMUSG00000097320	Tmem147os	1.3675	0.0067		5.9526	6.6353	6.23	7.694	7.7255	7.5009
ENSMUSG00000081562	Gm11575	1.3671	0.027		2.5928	2.5278	2.48	3.4076	4.3889	3.9054
ENSMUSG00000101731	3830432H09Rik	1.3667	0.1492		4.5429	4.2493	4.2481	6.7151	4.0629	6.3622
ENSMUSG00000054321	Taf4b	1.3651	0.008		8.4577	8.0477	8.3283	10.2297	9.3115	9.3879
ENSMUSG00000071856	Mcc	1.3648	0.0016		9.9977	10.0602	10.2794	11.8069	11.271	11.3537
ENSMUSG00000108291	Gm44292	1.3632	0.0924		4.0176	4.8884	4.5204	6.6074	6.2883	4.6204
ENSMUSG00000024413	Npc1	1.3628	0.0141		10.1832	10.0482	9.8589	12.0898	11.38	10.7088
ENSMUSG00000037071	Scd1	1.3628	0.0101		11.4146	10.8936	11.1207	12.6894	12.9855	11.8422
ENSMUSG00000026544	Dusp23	1.3627	0.0335		4.7748	5.4513	4.8317	6.9203	5.6614	6.5641
ENSMUSG00000022505	Emp2	1.3622	0.0374		11.0981	11.5875	10.2995	12.6661	12.8522	11.5534
ENSMUSG00000038564	Ift172	1.3619	0.0013		10.0526	10.2739	9.7743	11.5603	11.3777	11.2485
ENSMUSG00000112532	Gm36283	1.3611	0.2254		4.7202	3.868	6.1197	6.1888	4.879	7.7234
ENSMUSG00000041959	S100a10	1.3607	0.0023		11.9493	11.6076	12.2458	13.0907	13.2867	13.5073
ENSMUSG00000024493	Lars	1.3595	0.0051		11.8291	11.3784	12.1915	13.1553	12.8418	13.4803
ENSMUSG00000025507	Pidd1	1.3584	0.0356		7.9772	7.7131	7.8444	10.0791	9.2222	8.3086
ENSMUSG00000087213	2810408I11Rik	1.3584	0.0209		5.694	4.9308	5.8304	6.4449	6.8877	7.1977
ENSMUSG00000085956	4930481B07Rik	1.3583	0.0149		4.8274	4.1806	4.6621	5.731	5.7774	6.2365
ENSMUSG00000036894	Rap2b	1.3574	0.0038		9.1499	8.6931	8.7963	10.577	10.2616	9.873
ENSMUSG00000020142	Slc1a4	1.3565	0.001		10.3017	10.1187	10.1073	11.7203	11.2827	11.5944
ENSMUSG00000056031	9330154J02Rik	1.3558	0.1051		2.8174	2.5278	4.056	4.5167	3.641	5.3111
ENSMUSG00000070644	Etnk2	1.3544	0.0393		3.6006	4.7532	3.6651	5.097	5.7774	5.2077
ENSMUSG00000024014	Pim1	1.3533	0.0028		9.3293	9.2359	9.683	10.8843	11.0079	10.4159
ENSMUSG00000026235	Epha4	1.3471	0.0176		8.8402	8.8859	10.1135	10.6183	10.4913	10.7714
ENSMUSG00000103808	Gm37060	1.347	0.0868		2.5928	3.579	3.8344	3.749	5.3226	4.9755
ENSMUSG00000020334	Slc22a4	1.3423	0.0291		5.803	6.2728	6.6257	8.1761	7.6206	6.9318
ENSMUSG00000031273	Col4a6	1.3423	0.082		3.0117	2.5278	3.1272	5.2834	3.9684	3.4417
ENSMUSG00000087496	Gm13523	1.3401	0.0106		4.4113	4.3774	4.5692	6.0311	5.5353	5.8119
ENSMUSG00000022895	Ets2	1.3386	0.0059		10.0786	10.3413	10.097	12.0951	11.2549	11.1827
ENSMUSG00000086813	Gm13657	1.3381	0.0613		4.6635	5.0121	3.4733	5.8773	6.0782	5.2077
ENSMUSG00000036693	Nop14	1.3378	0.0006		10.012	9.8191	9.865	11.1236	11.2729	11.313
ENSMUSG00000097150	Gm26513	1.3378	0.028		3.6006	4.1086	4.2481	5.8773	5.1178	4.9755
ENSMUSG00000079614	Seh1l	1.3376	0.0032		11.234	11.0436	10.8316	12.7927	12.2615	12.068
ENSMUSG00000053604	Rpia	1.3368	0.007		8.8935	8.5644	9.5915	10.2831	10.2997	10.4769
ENSMUSG00000026452	Syt2	1.3365	0.1587		2.3266	2.9133	3.252	5.5097	2.8436	4.1482
ENSMUSG00000097683	Gm26644	1.3362	0.0577		2.8174	4.1806	3.5724	5.417	4.3889	4.7731
ENSMUSG00000112449	Srp54b	1.3362	0.0641		2.8174	2.9133	3.5724	3.6439	4.46	5.2077
ENSMUSG00000037295	Ldlrap1	1.3361	0.019		9.9555	10.4187	9.6705	11.8065	11.6458	10.6007
ENSMUSG00000092341	Malat1	1.3356	0.0438		17.6555	18.1316	17.1102	19.2552	18.8736	18.7753
ENSMUSG00000022479	Vdr	1.3351	0.0809		4.1054	3.7779	3.1272	5.9888	4.7712	4.2558
ENSMUSG00000039616	Mocos	1.3351	0.0341		3.0117	2.9133	3.9858	4.8358	4.46	4.6204
ENSMUSG00000052632	Asap2	1.3349	0.0847		9.1	9.2548	8.4635	11.058	10.7921	8.9728
ENSMUSG00000031075	Ano1	1.3344	0.0496		9.439	10.9023	9.5781	11.6925	11.6396	10.5905
ENSMUSG00000036737	Oxsr1	1.3331	0.0006		10.6663	10.8362	10.7253	12.0217	12.2172	11.9883
ENSMUSG00000085705	Gm16046	1.3327	0.0225		5.803	6.6224	7.1191	7.7005	7.8697	7.9724
ENSMUSG00000056004	Elapor2	1.3315	0.0159		3.183	3.579	3.1272	4.575	4.7712	4.5375
ENSMUSG00000019978	Epb41l2	1.3312	0.0022		10.0457	9.6453	10.2748	11.3986	11.4162	11.1447
ENSMUSG00000021226	Acot2	1.3309	0.0113		9.0566	9.6374	8.7521	10.3421	10.1218	10.975
ENSMUSG00000112317	Gm47580	1.3302	0.0278		4.7748	4.3774	3.6651	5.5683	5.8321	5.4076
ENSMUSG00000097693	4930471M09Rik	1.3295	0.0357		3.4743	3.3482	4.1868	5.3848	4.46	5.153
ENSMUSG00000033278	Ptprm	1.3294	0.0013		9.1806	9.193	9.1451	10.757	10.458	10.2918
ENSMUSG00000029407	Uso1	1.3293	0.1769		11.1397	10.9983	8.9214	12.275	12.3361	10.436
ENSMUSG00000105006	Gm9484	1.3277	0.0243		3.336	3.579	3.4733	5.1362	4.9793	4.2558
ENSMUSG00000024769	Cdc42bpg	1.3255	0.1099		10.054	10.5072	9.7064	12.5095	11.717	10.0176
ENSMUSG00000091514	Gm17484	1.3254	0.0189		4.1881	4.1806	4.3068	6.0311	5.4678	5.153
ENSMUSG00000106224	Gm43823	1.3249	0.0165		4.6635	4.5506	4.7064	6.0311	5.5019	6.3622
ENSMUSG00000087685	1700122E12Rik	1.3232	0.0142		3.4743	3.2173	3.5724	4.7873	4.8261	4.6204
ENSMUSG00000112338	Gm47693	1.323	0.0351		3.6006	3.2173	2.48	4.2564	4.6546	4.3559
ENSMUSG00000044934	Zfp367	1.3215	0.0141		10.7665	10.5125	10.9766	12.7944	11.8816	11.5442
ENSMUSG00000070305	Mpzl3	1.3204	0.0044		7.7234	7.8353	7.367	9.2105	8.9713	8.7049
ENSMUSG00000085385	Snhg17	1.3164	0.0121		9.4516	9.6596	10.3228	10.9744	10.7634	11.6454
ENSMUSG00000097882	0610038B21Rik	1.3163	0.0306		4.9746	5.2315	5.9458	6.4133	6.4368	7.2507
ENSMUSG00000039563	2210406O10Rik	1.3156	0.0193		2.8174	3.0733	2.671	3.9387	4.314	4.2558
ENSMUSG00000115685	D730044K07Rik	1.3154	0.0686		3.6006	3.3482	5.019	5.4794	5.0269	5.4076
ENSMUSG00000020658	Efr3b	1.3149	0.0176		3.183	2.9133	3.4733	4.5167	4.46	4.5375
ENSMUSG00000074259	Gramd2	1.3112	0.1658		5.5132	5.6922	5.9083	8.643	6.6648	5.7396
ENSMUSG00000052684	Jun	1.3102	0.0311		10.1932	10.5563	10.3871	12.6632	11.1877	11.2164
ENSMUSG00000049751	Rpl36al ENSMUSG00000049751	1.3099	0.045		3.6006	4.3148	4.7494	5.2117	5.2839	6.0988
ENSMUSG00000110341	Gm45424	1.3099	0.151		3.183	4.1086	2.2599	5.3848	4.6546	3.4417
ENSMUSG00000026979	Psd4	1.3084	0.0463		5.1907	5.7166	5.0537	6.4604	7.4476	5.9783
ENSMUSG00000035969	Rusc2	1.3071	0.0013		11.5306	11.4814	11.5245	13.1002	12.7985	12.5591
ENSMUSG00000031438	Rnf128	1.3068	0.011		10.1001	9.7318	9.1002	10.9711	11.2986	10.5827
ENSMUSG00000031803	B3gnt3	1.3067	0.0167		10.3643	10.8341	10.058	11.8004	12.2776	11.0985
ENSMUSG00000035992	Fnip1	1.3064	0.0072		10.8546	10.4976	10.7539	12.5989	11.7991	11.6273
ENSMUSG00000057666	Gapdh	1.3055	0.0051		15.9006	16.0334	15.8258	17.2435	17.2572	17.1758
ENSMUSG00000026031	Cflar	1.3051	0.0059		11.2395	11.1861	10.8832	12.844	12.4808	11.8993
ENSMUSG00000000811	Txnrd3	1.3029	0.0215		10.9377	10.0721	9.8552	11.7839	11.9723	11.0177
ENSMUSG00000086539	Gm16759	1.3021	0.0278		2.5928	2.9133	2.8396	3.6439	4.46	4.1482
ENSMUSG00000042507	Mideas	1.3015	0.001		10.5449	10.6192	10.3165	11.9335	11.6237	11.8281
ENSMUSG00000102466	Gm38200	1.3014	0.0348		3.9241	4.3148	4.6621	5.015	5.6913	6.0988
ENSMUSG00000108668	Gm32816	1.3013	0.0922		2.5928	2.2879	2.8396	2.7726	4.314	4.5375
ENSMUSG00000047554	Tmem41b	1.2999	0.0043		10.2437	10.0967	10.2712	11.9838	11.4146	11.1129
ENSMUSG00000028893	Sesn2	1.2994	0.0013		10.0498	9.9303	9.7678	11.4675	11.102	11.0767
ENSMUSG00000019487	Trip10	1.2993	0.0018		10.5596	10.7677	10.3931	11.8705	12.1337	11.6141
ENSMUSG00000035310	NA	1.2989	0.0041		10.1679	9.6196	9.7009	11.3879	11.2258	10.7714
ENSMUSG00000067787	Blcap	1.2988	0.0013		9.5251	9.7393	9.9143	10.85	11.1158	11.1093
ENSMUSG00000020964	Sel1l	1.2983	0.0105		11.6618	11.5628	11.1042	13.3569	12.5183	12.3484
ENSMUSG00000117406	Ntn3	1.2982	0.028		3.336	3.3482	2.9906	4.8827	4.6546	4.0319
ENSMUSG00000045414	Dipk2a	1.2979	0.0041		8.8078	8.5711	9.1887	10.2842	9.851	10.3261
ENSMUSG00000034308	Sdr42e1	1.2975	0.0241		4.1881	5.0121	4.6164	6.0518	5.5019	6.1555
ENSMUSG00000035845	Alg12	1.2971	0.0016		9.0005	8.9748	9.0212	10.5779	10.1011	10.2088
ENSMUSG00000106547	B230303O12Rik	1.2971	0.0546		3.7167	4.4951	3.252	5.3848	5.4329	4.5375
ENSMUSG00000102881	Gm3807	1.297	0.0168		4.0176	4.4375	4.1229	5.5683	5.1611	5.7396
ENSMUSG00000018848	Rars	1.2967	0.0013		11.2825	10.9687	11.4245	12.4364	12.6759	12.4535
ENSMUSG00000108436	Gm44851	1.2967	0.0588		2.3266	2.9133	3.7522	4.5167	4.46	3.9054
ENSMUSG00000089706	B230216N24Rik	1.2966	0.0663		3.336	3.0733	2.9906	4.3924	5.2839	3.6134
ENSMUSG00000047671	Dynlt4	1.2958	0.0158		3.9241	3.7779	3.8344	5.4486	4.879	5.0963
ENSMUSG00000032525	Nktr	1.2943	0.002		11.2094	11.2051	10.9225	12.6477	12.4822	12.0899
ENSMUSG00000029610	Aimp2	1.2922	0.0021		9.3497	9.3555	9.7454	10.5973	10.7151	11.0148
ENSMUSG00000024042	Sik1	1.2917	0.0093		10.2303	10.6345	10.7172	12.281	11.9317	11.2445
ENSMUSG00000097113	Gm19705	1.2909	0.2415		4.0176	3.4682	5.1531	3.847	5.7493	6.9154
ENSMUSG00000059456	Ptk2b	1.2907	0.0032		9.1421	9.0584	9.2758	10.6951	10.6075	10.046
ENSMUSG00000025348	Itga7	1.2905	0.0102		8.9539	9.3613	10.1186	10.7396	10.773	10.7927
ENSMUSG00000028539	Artn	1.2898	0.0219		3.8241	4.0328	3.6651	5.4486	5.2441	4.6988
ENSMUSG00000077394	Gm24339	1.2892	0.0238		7.7024	8.0477	8.4603	9.0189	8.9743	10.0848
ENSMUSG00000092035	Peg10	1.2889	0.1039		8.271	6.3373	7.8041	8.8725	8.0126	9.3938
ENSMUSG00000028059	Arhgef2	1.2884	0.0021		11.8763	11.8633	11.6791	13.3271	12.7391	13.2177
ENSMUSG00000022637	Cblb	1.2881	0.0236		9.7563	9.8345	9.0146	11.481	10.7403	10.2485
ENSMUSG00000030583	Sipa1l3	1.2879	0.015		11.5842	11.6186	10.8928	13.0842	12.8303	12.0447
ENSMUSG00000117912	Gm50383	1.2876	0.0401		3.0117	3.868	2.671	4.575	4.3889	4.4496
ENSMUSG00000036452	Arhgap26	1.2875	0.0469		4.6635	5.1971	5.3049	6.9315	6.5553	5.5412
ENSMUSG00000000531	Tamalin	1.2873	0.0093		6.5301	7.218	6.8496	7.9133	8.4529	8.0934
ENSMUSG00000041945	Mfsd9	1.2868	0.0042		8.7131	8.5878	8.2996	10.1952	9.6335	9.6321
ENSMUSG00000117429	A430019L02Rik	1.2863	0.0448		3.6006	4.1806	3.4733	4.3924	5.5679	5.153
ENSMUSG00000039395	Mreg	1.2862	0.0337		5.1907	5.0121	5.4682	7.1773	6.4717	5.8808
ENSMUSG00000078945	Naip2	1.2861	0.0336		5.065	4.1806	4.7494	6.4449	5.9104	5.498
ENSMUSG00000032122	Slc37a2	1.2843	0.0178		3.183	3.0733	3.1272	4.326	4.6546	4.2558
ENSMUSG00000085843	Kank4os	1.284	0.0324		2.8174	2.9133	3.252	4.4559	3.7586	4.6204
ENSMUSG00000112637	Gm48225	1.2826	0.0407		3.8241	3.7779	2.9906	4.326	5.2032	4.9112
ENSMUSG00000029228	Lnx1	1.2812	0.0859		2.8174	4.1086	3.9858	5.1745	5.4329	4.1482
ENSMUSG00000097440	Gm6277	1.2799	0.0539		2.3266	3.0733	2.2599	3.9387	4.314	3.2468
ENSMUSG00000116604	Gm49745	1.2797	0.0335		2.3266	2.9133	2.671	3.5306	4.314	3.9054
ENSMUSG00000028849	Map7d1	1.2784	0.0033		10.8299	10.8889	10.7943	12.2952	12.3935	11.6595
ENSMUSG00000066632	Pgk1-rs7	1.2776	0.0582		2.5928	3.0733	2.9906	3.4076	4.8261	4.2558
ENSMUSG00000045746	B230317F23Rik	1.2765	0.0259		3.9241	4.6554	4.7064	6.0311	5.6309	5.4535
ENSMUSG00000006310	Zbtb32	1.2763	0.1255		4.1054	4.972	3.6651	6.4604	5.6614	4.4496
ENSMUSG00000045763	Basp1	1.2763	0.0928		10.173	9.9013	11.6581	11.4081	11.4368	12.7166
ENSMUSG00000068547	Clca4a	1.2754	0.0554		3.183	2.7334	3.1272	5.097	3.8673	3.9054
ENSMUSG00000032812	Arap1	1.2753	0.0025		8.915	8.8533	8.593	10.1455	10.2579	9.7837
ENSMUSG00000031232	Magt1	1.275	0.0011		11.0261	11.0841	11.2142	12.6281	12.264	12.2575
ENSMUSG00000085148	Mir22hg	1.2748	0.0117		7.9117	7.8014	8.3424	8.907	9.1406	9.8323
ENSMUSG00000074818	Pdzd7	1.273	0.2098		3.183	5.0121	3.5724	6.1888	5.6309	3.7668
ENSMUSG00000113792	Gm10933	1.2727	0.0436		3.9241	4.3148	3.7522	4.7873	5.9847	5.0372
ENSMUSG00000052131	Akr1b7	1.2726	0.0852		3.4743	3.868	2.2599	4.9282	4.46	4.0319
ENSMUSG00000010461	Eya4	1.2724	0.5012		3.9241	4.7051	8.3032	5.318	6.0086	9.423
ENSMUSG00000085995	Gm2788	1.2712	0.0309		3.336	3.3482	3.8344	5.1745	4.314	4.8438
ENSMUSG00000032409	Atr	1.2704	0.001		10.5311	10.5537	10.8478	11.8015	12.0234	11.9189
ENSMUSG00000038146	Notch3	1.2701	0.4075		4.3407	6.2728	3.5724	7.8439	6.539	3.6134
ENSMUSG00000044006	Cilp2	1.2691	0.082		2.8174	3.2173	2.2599	4.7371	3.2167	4.1482
ENSMUSG00000034586	Hid1	1.2683	0.001		9.6992	9.6485	9.4324	10.761	10.9175	10.9065
ENSMUSG00000107352	Gm43660	1.2681	0.031		2.5928	3.2173	3.252	4.1833	4.0629	4.6204
ENSMUSG00000022498	Txndc11	1.2677	0.0014		9.7898	9.4945	9.6236	10.9478	10.6876	11.0757
ENSMUSG00000049811	Fam161a	1.2672	0.1556		4.7202	4.4951	3.6651	6.151	6.3829	4.1482
ENSMUSG00000071454	Dtnb	1.2669	0.0043		10.3259	10.5333	10.1561	11.5981	11.999	11.2189
ENSMUSG00000032400	Zwilch	1.2657	0.0037		10.0512	9.3901	9.926	11.2554	11.0263	10.8826
ENSMUSG00000042354	Gnl3	1.2657	0.0064		10.1857	9.6923	10.5047	11.295	11.1652	11.7195
ENSMUSG00000042473	Tbc1d8b	1.265	0.0242		9.2923	9.1101	8.1751	10.3814	10.3764	9.6146
ENSMUSG00000022265	Ank	1.2624	0.0328		8.5029	8.9047	7.9904	10.1078	10.1205	8.9569
ENSMUSG00000117575	Gm36486	1.2609	0.0159		4.2664	4.4375	4.1229	5.7815	5.5679	5.2603
ENSMUSG00000093553	Gm20633	1.2603	0.039		4.7202	4.8447	5.5914	6.7786	5.7493	6.4096
ENSMUSG00000021974	Fgf9	1.26	0.0677		8.5815	8.513	7.1026	9.5199	9.8056	8.6518
ENSMUSG00000047821	Trim16	1.2596	0.0011		9.7731	9.9395	10.0718	11.2043	11.0459	11.313
ENSMUSG00000077990	NA	1.2592	0.0332		4.8782	4.1806	4.6621	6.0722	6.1659	5.2603
ENSMUSG00000027422	Rrbp1	1.2579	0.0021		11.5918	11.5022	11.1349	12.8099	12.7613	12.4315
ENSMUSG00000040359	Ufl1	1.2578	0.0014		10.2677	10.147	9.8577	11.4881	11.3304	11.2272
ENSMUSG00000012296	Tjap1	1.2564	0.0017		9.7409	10.0054	10.0002	11.4041	11.1625	10.9492
ENSMUSG00000003814	Calr	1.2552	0.011		13.5789	13.3387	14.21	15.3282	14.6789	14.886
ENSMUSG00000020873	Slc35b1	1.255	0.0022		10.2315	10.0661	10.4174	11.7367	11.204	11.5395
ENSMUSG00000028124	Gclm	1.255	0.0169		11.2742	10.6289	10.64	12.6788	11.5364	12.0931
ENSMUSG00000030683	Sez6l2	1.255	0.0472		4.2664	4.1806	3.252	5.5967	4.7712	5.0963
ENSMUSG00000058656	Samd12	1.2535	0.2059		5.0205	6.0978	4.1868	7.1196	7.0348	4.9112
ENSMUSG00000069554	I830134H01Rik	1.2532	0.0298		2.5928	2.7334	3.252	3.847	4.2351	4.2558
ENSMUSG00000018821	Avpi1	1.2527	0.0039		9.462	9.802	9.8216	11.2665	10.9907	10.5866
ENSMUSG00000026672	Optn	1.2521	0.0014		9.1186	8.8642	9.0835	10.4037	10.2838	10.135
ENSMUSG00000064307	Lrrc51	1.2521	0.0726		4.6635	6.0978	4.5204	6.0518	6.7238	6.2625
ENSMUSG00000071332	E230015B07Rik	1.2513	0.0975		2.8174	2.2879	3.4733	4.9282	3.3724	4.0319
ENSMUSG00000015702	Anxa9	1.2512	0.0358		6.251	6.501	6.0526	8.1714	6.7805	7.6063
ENSMUSG00000037887	Dusp8	1.2512	0.0215		9.1186	9.392	9.4488	11.2934	9.9126	10.5072
ENSMUSG00000027007	Itprid2	1.2511	0.0224		9.2031	9.1688	8.2593	10.4187	10.3845	9.5813
ENSMUSG00000004069	Dnaja3	1.2505	0.0006		10.8937	10.8815	10.7729	12.1648	12.0131	12.1218
ENSMUSG00000024383	Map3k2	1.2503	0.0056		11.4428	11.4324	10.9006	12.8131	12.6052	12.1084
ENSMUSG00000118557	Gm53043	1.2499	0.0356		3.183	3.6819	3.7522	4.2564	5.0731	5.0372
ENSMUSG00000092274	Neat1	1.249	0.0792		14.0609	14.7639	13.3381	16.1544	15.2241	14.5315
ENSMUSG00000056313	Tcim	1.2489	0.1204		5.9287	7.3011	8.3247	8.5035	8.7263	8.0715
ENSMUSG00000104493	Gm19552	1.2489	0.0281		4.1054	3.868	3.3669	4.8827	5.3603	4.8438
ENSMUSG00000021482	Prxl2c	1.2488	0.0009		10.3798	10.522	10.2739	11.5453	11.5795	11.7972
ENSMUSG00000028179	Cth	1.2488	0.0032		9.8514	9.2775	9.2813	10.6694	10.6154	10.872
ENSMUSG00000105457	Gm43200	1.2479	0.1156		4.2664	3.0733	3.6651	3.847	5.3603	5.5412
ENSMUSG00000113423	Gm3791	1.2479	0.0417		2.8174	2.9133	2.9906	3.5306	4.314	4.6204
ENSMUSG00000035506	Slc12a8	1.2465	0.0078		5.4475	5.5084	5.6149	6.8629	6.8217	6.6256
ENSMUSG00000053560	Ier2	1.2448	0.0037		8.2615	8.4267	8.2178	9.2128	9.6507	9.7769
ENSMUSG00000037982	Gm9725	1.2439	0.0431		3.0117	3.868	2.9906	4.4559	4.2351	4.9112
ENSMUSG00000020893	Per1	1.2435	0.2514		9.9555	10.0141	8.1311	11.4545	11.485	8.8917
ENSMUSG00000003721	Insig2	1.2433	0.0291		9.3764	9.2443	8.4667	10.6885	10.5475	9.5813
ENSMUSG00000035509	Fbxl21	1.2431	0.0429		6.0664	6.7223	6.0353	7.4664	8.2216	6.8654
ENSMUSG00000116842	Gm49588	1.243	0.1117		3.6006	3.9527	3.5724	6.17	4.2351	4.4496
ENSMUSG00000109541	Gm6112	1.2427	0.0555		2.5928	3.2173	2.48	3.5306	3.8673	4.6204
ENSMUSG00000017167	Cntnap1	1.2426	0.0238		5.2689	5.9816	5.705	7.1678	6.4011	7.1144
ENSMUSG00000043789	Vwce	1.2421	0.0508		3.336	3.579	3.8344	5.4486	4.879	4.1482
ENSMUSG00000073725	Lmbrd1	1.242	0.0039		10.1187	9.8428	9.7612	11.553	10.9088	10.9868
ENSMUSG00000097673	Gm26608	1.2419	0.0627		3.9241	2.9133	3.4733	5.3518	4.2351	4.4496
ENSMUSG00000111481	Gm47652	1.2417	0.018		4.0176	3.579	4.056	5.097	5.0731	5.2077
ENSMUSG00000094845	Tmem95	1.2408	0.0196		4.1054	3.7779	4.3068	5.4794	5.0731	5.3601
ENSMUSG00000054612	Mgmt	1.2405	0.0227		6.3798	6.079	6.4674	8.1331	7.4736	7.0411
ENSMUSG00000103357	Gm7804	1.2404	0.1026		3.9241	3.4682	4.947	5.652	4.5279	5.8808
ENSMUSG00000117768	8030456M14Rik	1.2397	0.0215		4.7202	4.7051	5.3614	6.4758	5.9604	6.0696
ENSMUSG00000032271	Nnmt	1.2393	0.0484		5.7765	5.2978	6.6486	6.8512	6.9631	7.6265
ENSMUSG00000037465	Klf10	1.238	0.0022		10.2119	10.4056	10.0622	11.6495	11.5805	11.1639
ENSMUSG00000000627	Sema4f	1.2371	0.0899		2.3266	3.2173	3.1272	4.9723	3.9684	3.4417
ENSMUSG00000039318	Rab3gap2	1.2358	0.0078		10.7898	10.6725	10.5326	12.4845	11.5968	11.621
ENSMUSG00000100975	Gm28875	1.2355	0.1584		6.5301	6.7698	5.3334	8.5695	7.4822	6.2881
ENSMUSG00000024594	Prrc1	1.2354	0.005		9.8967	9.7167	9.1671	10.9738	10.9175	10.5956
ENSMUSG00000026167	Wnt10a	1.2352	0.069		3.6006	4.3774	4.947	5.8539	4.93	5.8468
ENSMUSG00000027248	Pdia3	1.2352	0.0467		13.2068	12.964	12.5052	15.0002	14.0453	13.336
ENSMUSG00000032826	Ank2	1.2351	0.1355		4.1881	3.9527	5.3889	5.7052	4.8261	6.7037
ENSMUSG00000105755	Gm43514	1.235	0.0445		2.3266	3.2173	3.3669	4.0249	4.2351	4.3559
ENSMUSG00000107115	Gm43052	1.2325	0.0234		3.183	2.9133	3.3669	4.1833	4.5279	4.4496
ENSMUSG00000054065	Pkp3	1.2324	0.2303		5.4807	6.9963	5.5676	8.0378	8.1209	5.5831
ENSMUSG00000039345	Mettl22	1.2322	0.0041		7.4905	7.4025	7.8835	8.798	8.8001	8.8749
ENSMUSG00000094595	Fsbp	1.2322	0.008		6.192	6.1525	6.0526	7.4431	7.5652	7.0855
ENSMUSG00000001020	S100a4	1.2321	0.0304		4.8274	4.0328	4.1229	5.2117	5.6913	5.7762
ENSMUSG00000021379	Id4	1.2317	0.1463		8.0174	8.1454	6.1837	9.5781	8.3629	8.1007
ENSMUSG00000015879	Fam184b	1.2307	0.0871		4.3407	5.051	3.3669	5.6246	4.9793	5.8468
ENSMUSG00000020038	Cry1	1.2302	0.007		8.7374	8.6993	8.4143	9.3693	10.1355	10.0366
ENSMUSG00000111069	Gm48646	1.2298	0.0702		4.7202	4.4375	4.6621	4.9282	5.9356	6.6455
ENSMUSG00000020388	Pdlim4	1.2297	0.1007		2.8174	2.9133	2.671	5.1362	3.5129	3.4417
ENSMUSG00000030699	Tbx6	1.2297	0.0492		3.336	4.3774	3.6651	5.5097	4.7141	4.8438
ENSMUSG00000020898	Ctc1	1.2287	0.0018		10.612	10.7269	10.8178	12.1748	12.005	11.6632
ENSMUSG00000027944	Hax1	1.2278	0.0195		9.853	9.5499	10.5265	10.9846	10.8831	11.7451
ENSMUSG00000029436	Mmp17	1.2274	0.0945		5.8546	5.8104	5.5676	7.4352	7.7036	5.7762
ENSMUSG00000016526	Dyrk3	1.2273	0.0058		8.271	7.8464	8.3529	9.4993	9.5846	9.0681
ENSMUSG00000051977	Prdm9	1.2271	0.0145		7.1725	7.4616	6.8692	8.8638	8.2867	8.0342
ENSMUSG00000044072	Eml6	1.2262	0.0063		8.1263	8.1319	8.0126	9.7556	8.9984	9.1952
ENSMUSG00000118386	Gm50149	1.225	0.0438		2.5928	2.2879	2.48	3.4076	3.3724	4.2558
ENSMUSG00000031734	Irx3	1.2247	0.0829		3.183	4.604	3.9858	5.248	5.6614	4.5375
ENSMUSG00000032641	Gpr19	1.2243	0.0213		7.4575	7.055	7.7836	9.2356	8.4309	8.3024
ENSMUSG00000116908	Gm49599	1.2238	0.0093		7.6376	7.4688	7.0691	8.2496	8.8273	8.7699
ENSMUSG00000038774	Ascc3	1.2237	0.0032		11.0085	10.5898	10.882	12.3934	11.8233	11.9346
ENSMUSG00000034327	Kctd9	1.2233	0.0418		9.7997	9.5277	8.6845	11.2543	10.435	9.9925
ENSMUSG00000022021	Diaph3	1.2226	0.0169		10.5741	10.1638	10.2526	12.2396	11.3829	11.0357
ENSMUSG00000025937	Lactb2	1.2218	0.0092		9.9658	9.4441	9.7769	11.4843	10.7332	10.6347
ENSMUSG00000095186	Gm10718	1.2217	0.1614		3.0117	3.0733	2.8396	3.749	3.2167	5.6239
ENSMUSG00000048779	P2ry6	1.2215	0.0743		2.5928	2.5278	2.8396	4.7371	3.641	3.2468
ENSMUSG00000104325	Gm37321	1.2213	0.0216		4.1881	4.1806	4.3632	5.0566	5.5997	5.7396
ENSMUSG00000022136	Dnajc3	1.2212	0.0246		11.1616	10.9655	10.8416	13.0347	11.6858	11.9117
ENSMUSG00000096971	4930556M19Rik	1.221	0.0299		5.5449	6.1345	5.4158	7.3872	6.9384	6.4327
ENSMUSG00000026657	Frmd4a	1.2207	0.0191		8.3223	8.6525	8.8267	9.9908	10.3118	9.161
ENSMUSG00000028207	Asph	1.2205	0.0015		11.7491	11.9881	11.6141	13.0319	13.1543	12.8267
ENSMUSG00000104735	C130075A20Rik	1.2203	0.0625		4.3407	3.2173	3.6651	4.4559	4.93	5.498
ENSMUSG00000024074	Crim1	1.2202	0.0011		11.7521	11.6092	11.9831	13.0246	12.9696	13.0108
ENSMUSG00000028889	Yrdc	1.22	0.002		8.9301	8.9388	9.2832	10.3515	10.1191	10.3415
ENSMUSG00000020173	Cobl	1.2199	0.068		11.4574	11.2767	9.9766	12.6962	12.2338	11.4404
ENSMUSG00000022844	Pdia5	1.2197	0.0194		8.5349	8.513	7.9262	10.1139	9.4772	9.0421
ENSMUSG00000036091	Hyal3	1.2195	0.2817		3.6006	3.0733	3.252	6.5792	3.7586	3.2468
ENSMUSG00000042404	Dennd4b	1.2195	0.0085		8.0619	8.4954	8.457	10.0041	9.4534	9.2154
ENSMUSG00000034918	Cdhr2	1.2181	0.2138		2.5928	4.2493	2.48	4.9282	5.0269	3.0214
ENSMUSG00000021996	Esd	1.2166	0.001		11.8427	11.9071	12.1344	13.1299	13.1583	13.2459
ENSMUSG00000014243	Zswim7	1.2159	0.0164		5.9992	6.5562	6.9266	7.6266	7.6284	7.8746
ENSMUSG00000024909	Efemp2	1.2151	0.0581		3.0117	3.4682	2.9906	4.6311	3.641	4.8438
ENSMUSG00000028671	Gale	1.2143	0.0023		8.3405	8.0429	8.3805	9.4553	9.5027	9.4487
ENSMUSG00000055945	Prr18	1.2143	0.0215		3.0117	3.3482	3.3669	4.3924	4.5279	4.4496
ENSMUSG00000025236	Adpgk	1.214	0.0032		9.1755	9.4368	9.5959	10.34	10.6519	10.8582
ENSMUSG00000033909	Usp36	1.2135	0.0012		10.088	10.0803	10.0266	11.1811	11.1492	11.5052
ENSMUSG00000073437	D330041H03Rik	1.2132	0.0198		5.722	5.8552	5.9823	6.6213	7.0231	7.5546
ENSMUSG00000049957	Ccdc137	1.2119	0.0049		8.8402	8.9646	9.1431	9.8751	10.1232	10.5853
ENSMUSG00000025278	Flnb	1.2112	0.0018		13.3879	13.46	13.7464	14.7761	14.745	14.7068
ENSMUSG00000002603	Tgfb1	1.211	0.1059		6.764	7.4025	5.9272	7.8905	8.7654	7.0709
ENSMUSG00000050270	Tmem220	1.211	0.0412		4.4113	3.9527	3.5724	5.6788	4.9793	4.9112
ENSMUSG00000048756	Foxo3	1.2104	0.0216		11.5331	11.8203	10.9658	13.2448	12.55	12.1557
ENSMUSG00000031513	Leprotl1	1.2103	0.0007		10.2119	10.1267	10.2748	11.4438	11.3615	11.4389
ENSMUSG00000115771	Gm49312	1.2093	0.0493		3.336	3.4682	3.9858	4.1833	5.0269	5.2077
ENSMUSG00000032177	Pde4a	1.2088	0.1786		3.336	4.7532	3.252	5.5097	5.6913	3.7668
ENSMUSG00000004661	Arid3b	1.2083	0.0183		5.5449	5.8104	5.4937	6.3645	7.1142	6.9952
ENSMUSG00000078607	1810010H24Rik	1.2078	0.0427		3.4743	4.0328	3.3669	4.5167	5.3603	4.6204
ENSMUSG00000109341	Gm30873	1.2074	0.3878		2.8174	2.5278	4.7912	3.9387	3.0422	6.7778
ENSMUSG00000024235	Map3k8	1.2073	0.0402		5.0205	4.6554	5.6149	6.7909	6.2079	5.914
ENSMUSG00000042677	Zc3h12a	1.207	0.0095		6.6949	6.9142	6.4015	8.0169	8.0185	7.5961
ENSMUSG00000006724	Cyp27b1	1.2051	0.1502		3.183	3.7779	4.1868	5.9672	3.7586	5.0372
ENSMUSG00000024357	Sil1	1.2044	0.0027		8.7166	8.774	8.979	10.2919	9.9157	9.8751
ENSMUSG00000042742	Bmt2	1.2034	0.0032		10.7229	10.859	10.8045	12.383	11.9239	11.6898
ENSMUSG00000037965	Zc3h7a	1.2033	0.0006		11.0568	10.9636	10.9544	12.181	12.1603	12.2433
ENSMUSG00000112822	A130012E19Rik	1.2015	0.0345		5.7495	5.3298	5.6606	6.1888	6.7805	7.3753
ENSMUSG00000085091	Egfros	1.2001	0.1257		4.5429	5.265	4.9835	7.3708	5.397	5.6239
ENSMUSG00000012123	Crybg2	1.1998	0.0818		5.4135	5.3298	4.8712	6.4449	7.2708	5.498
ENSMUSG00000028195	Ccn1	1.1998	0.1109		10.9037	10.3314	12.2121	11.6512	12.2959	13.0995
ENSMUSG00000031843	Mphosph6	1.1996	0.0022		9.2424	8.9466	9.4091	10.3273	10.3626	10.5072
ENSMUSG00000029875	Ccdc184	1.1994	0.122		5.5132	5.5084	4.6621	6.8746	7.1469	5.2603
ENSMUSG00000021360	Gcnt2	1.1992	0.0153		7.0888	6.4582	6.9544	8.0274	8.386	7.6854
ENSMUSG00000024163	Mapk8ip3	1.1986	0.0086		10.6045	11.1629	10.5555	11.7943	12.4241	11.7006
ENSMUSG00000104154	Gm38104	1.1977	0.0503		3.6006	3.579	4.6164	5.0566	4.879	5.4535
ENSMUSG00000041147	Brca2	1.1974	0.0019		10.2533	9.8345	10.2109	11.4325	11.2679	11.1904
ENSMUSG00000036777	Anln	1.1972	0.0037		12.582	12.0933	12.1857	13.5143	13.7225	13.2156
ENSMUSG00000027787	Nmd3	1.1967	0.0025		9.875	9.3339	9.5661	10.7836	10.6866	10.8951
ENSMUSG00000109771	Gm35315	1.1966	0.0089		6.7367	6.8382	7.3391	7.9904	8.2818	8.2316
ENSMUSG00000028978	Nos3	1.1948	0.0459		4.1054	3.6819	4.1229	5.7565	5.1178	4.6204
ENSMUSG00000029414	Kntc1	1.1944	0.0019		11.082	10.5571	10.9704	12.0444	12.0789	12.0693
ENSMUSG00000063652	Slc22a21	1.1926	0.0498		5.5449	6.5289	5.5914	6.7408	7.6889	6.8135
ENSMUSG00000027171	Prrg4	1.1924	0.0124		8.5309	9.0392	8.72	10.2079	10.2566	9.4026
ENSMUSG00000031342	Gpm6b	1.1921	0.0885		2.8174	3.3482	3.3669	4.7371	4.93	3.4417
ENSMUSG00000054951	9130008F23Rik	1.1919	0.0452		6.6518	6.648	7.5544	7.5917	8.0819	8.7562
ENSMUSG00000026048	Ercc5	1.1916	0.0481		9.4156	8.962	9.0559	11.2814	10.0602	9.6667
ENSMUSG00000026193	Fn1	1.1907	0.0115		13.09	13.212	13.9329	14.6082	14.3188	14.8802
ENSMUSG00000027489	Necab3	1.1902	0.1067		4.4113	5.051	5.4937	7.0596	5.2839	6.183
ENSMUSG00000085586	Gm11613	1.1897	0.1942		4.0176	5.642	3.9121	6.1317	6.4717	4.5375
ENSMUSG00000091474	2610021A01Rik	1.1894	0.0019		9.1956	9.0073	9.2666	10.1659	10.3936	10.4783
ENSMUSG00000097148	Gm3839	1.1881	0.0667		2.5928	3.6819	2.9906	3.749	4.46	4.6204
ENSMUSG00000028126	Pip5k1a	1.188	0.0086		10.5281	10.2353	10.4698	12.1555	11.2624	11.3792
ENSMUSG00000050195	Scd4	1.1872	0.0764		5.1907	5.9198	4.9096	7.1773	6.6648	5.7396
ENSMUSG00000032449	Slc25a36	1.1866	0.0029		10.8991	11.1241	10.5326	11.9868	12.2008	11.928
ENSMUSG00000087590	Epb41l4aos	1.186	0.0725		7.1623	7.7842	8.5173	8.2762	9.0741	9.6715
ENSMUSG00000085037	4933421O10Rik	1.1859	0.0091		6.1095	6.5831	6.4802	7.4431	7.5733	7.714
ENSMUSG00000070371	Prss36	1.185	0.0399		5.9761	6.9036	7.2817	8.043	8.0876	7.5858
ENSMUSG00000023027	Atf1	1.1848	0.0279		9.7765	9.5499	8.8342	11.0509	10.6736	9.9906
ENSMUSG00000063851	Rnf183	1.1846	0.0884		6.6663	7.6574	6.2748	8.4538	8.4874	7.2112
ENSMUSG00000035399	Oser1	1.1845	0.0049		8.4948	8.561	8.9284	10.1611	9.6883	9.6884
ENSMUSG00000074063	Osgin1	1.1842	0.0335		8.3585	8.5474	7.6874	10.0382	9.2119	8.8959
ENSMUSG00000026640	Plxna2	1.1839	0.1053		9.9789	9.9395	9.3957	11.8261	11.3393	9.7004
ENSMUSG00000020250	Txnrd1	1.1833	0.0032		13.5458	13.1871	13.3661	14.6299	14.286	14.733
ENSMUSG00000033581	Igf2bp2	1.1832	0.0101		10.1409	9.7076	9.6871	11.4781	11.0532	10.554
ENSMUSG00000030747	Dgat2	1.183	0.0394		6.0664	7.2602	6.2148	7.919	7.7959	7.3753
ENSMUSG00000027506	Tpd52	1.1812	0.0028		11.5036	11.4227	11.1047	12.803	12.4547	12.3169
ENSMUSG00000084497	Gm22107	1.181	0.0348		4.3407	4.4375	4.6164	5.417	5.2839	6.2365
ENSMUSG00000096950	Gm9530	1.1805	0.0618		3.8241	3.0733	4.3068	5.318	4.6546	4.7731
ENSMUSG00000103901	Gm37499	1.1801	0.0293		5.3787	5.265	4.947	6.2968	6.8877	5.9465
ENSMUSG00000024807	Syvn1	1.1797	0.0051		10.5865	10.8672	10.2262	12.0509	11.5785	11.5899
ENSMUSG00000026196	Bard1	1.1794	0.0534		9.7597	8.9848	9.019	11.2599	10.3462	9.6956
ENSMUSG00000075703	Selenoi	1.1792	0.0029		11.3197	11.1948	11.2931	12.2011	12.3329	12.8111
ENSMUSG00000109154	Gm44822	1.1785	0.0707		4.9746	4.3148	3.8344	4.9282	5.6913	6.0398
ENSMUSG00000102737	1700016A09Rik	1.1775	0.0351		2.8174	3.0733	2.671	3.9387	4.3889	3.7668
ENSMUSG00000038387	Rras	1.1773	0.0413		8.623	8.6683	7.6539	9.587	9.9943	8.8959
ENSMUSG00000002845	Tmem39a	1.1772	0.0039		9.1447	9.324	9.4307	10.2217	10.3856	10.8237
ENSMUSG00000085085	1700086P04Rik	1.1753	0.0554		3.0117	3.868	3.252	5.0566	4.1515	4.4496
ENSMUSG00000048174	Tmem81	1.1731	0.0157		6.3441	6.0016	6.1993	7.5119	7.6206	6.9318
ENSMUSG00000105801	C430019N01Rik	1.1725	0.0942		2.8174	3.3482	3.9121	3.749	5.0731	4.7731
ENSMUSG00000085669	Gm14817	1.1721	0.0434		2.8174	3.0733	2.9906	4.2564	4.5279	3.6134
ENSMUSG00000037725	Ckap2	1.1718	0.0041		10.6316	10.1083	10.6002	11.7546	11.7564	11.3446
ENSMUSG00000044037	Als2cl	1.1702	0.0028		10.9746	11.0509	11.2022	12.5766	12.1699	11.9917
ENSMUSG00000060244	Alyref2	1.1702	0.0129		5.9761	6.515	6.4282	7.2947	7.4211	7.714
ENSMUSG00000104030	5330406M23Rik	1.1701	0.021		5.5449	5.642	5.1848	6.3809	7.0231	6.4779
ENSMUSG00000051890	Klhdc1	1.1699	0.1577		5.3064	6.1525	6.0179	8.3533	6.5057	6.1274
ENSMUSG00000032557	Uba5	1.1698	0.0036		9.3497	9.5138	9.511	10.3835	10.5145	10.9858
ENSMUSG00000028494	Plin2	1.1696	0.0179		10.7168	11.0923	11.3824	11.8	12.0618	12.8384
ENSMUSG00000077506	Scarna9	1.1693	0.0284		6.4146	7.2518	7.4988	8.1037	8.0303	8.5391
ENSMUSG00000040297	Suco	1.1686	0.0056		11.5102	11.1926	11.193	12.9142	12.2831	12.2043
ENSMUSG00000019889	Ptprk	1.1679	0.012		11.4533	11.269	12.0917	12.7815	12.4141	13.1221
ENSMUSG00000043333	Rhbdl2	1.1672	0.013		7.6883	7.5994	8.0815	9.2536	9.1325	8.4849
ENSMUSG00000097007	4930432B10Rik	1.166	0.0843		3.9241	3.6819	4.2481	4.8827	4.46	6.0094
ENSMUSG00000023940	Sgo1	1.1633	0.0023		10.1435	9.6549	9.9789	11.1939	11.0012	11.0721
ENSMUSG00000028801	Stpg1	1.1623	0.1641		2.3266	2.9133	3.252	4.8358	4.3889	2.7541
ENSMUSG00000107861	Gm44253	1.1621	0.0318		3.6006	3.6819	3.4733	4.326	4.879	5.0372
ENSMUSG00000049357	Brd8dc	1.1618	0.0556		3.8241	4.5506	4.6164	5.1745	5.2032	6.0988
ENSMUSG00000087365	C430049B03Rik	1.1615	0.028		6.2316	6.4582	6.7151	7.0182	7.9147	7.9566
ENSMUSG00000001962	Fam50a	1.1606	0.0063		9.1317	9.31	8.7705	10.5353	10.2238	9.935
ENSMUSG00000074604	Mgst2	1.1595	0.1723		3.336	5.8104	4.056	5.4486	5.6913	5.5412
ENSMUSG00000054387	Mdm4	1.1593	0.008		10.9392	10.968	10.6599	12.4937	11.9531	11.5982
ENSMUSG00000055334	Snupn	1.1587	0.0091		7.6153	7.6824	7.8143	8.7258	9.297	8.5655
ENSMUSG00000115161	Gm20555	1.1572	0.0227		5.4135	5.877	5.1848	6.3972	6.6344	6.9154
ENSMUSG00000047875	Gpr157	1.1566	0.2179		5.1907	5.4513	5.3334	7.4114	7.2609	4.7731
ENSMUSG00000044339	Alkbh2	1.1556	0.0052		7.2802	7.5043	7.5544	8.5035	8.4874	8.8146
ENSMUSG00000021211	Akr1c12	1.1554	0.0081		6.5301	6.399	6.5907	7.879	7.4907	7.6164
ENSMUSG00000042608	Stk40	1.1554	0.0019		8.9774	8.771	8.7809	10.1065	9.9928	9.896
ENSMUSG00000088246	NA	1.1554	0.295		3.8241	3.7779	2.2599	4.8827	5.6913	2.7541
ENSMUSG00000036678	Aaas	1.1553	0.0026		10.2994	9.9549	10.5273	11.3981	11.4695	11.38
ENSMUSG00000105636	Gm43625	1.1553	0.0319		4.1054	3.6819	3.6651	4.6311	5.0269	5.2603
ENSMUSG00000039234	Sec24d	1.1535	0.0076		10.3029	9.7659	10.1571	11.4191	10.8016	11.4658
ENSMUSG00000105510	Gm43815	1.1531	0.0386		4.5429	4.7532	4.4176	5.1362	6.1227	5.914
ENSMUSG00000007783	Cpt1c	1.152	0.0162		8.6991	8.2704	8.8065	10.2984	9.4024	9.5313
ENSMUSG00000032308	Ulk3	1.1518	0.0078		8.8812	9.314	8.596	9.976	10.3579	9.9126
ENSMUSG00000028063	Lmna	1.1513	0.0025		12.8055	12.6663	12.9334	13.7409	14.1834	13.9348
ENSMUSG00000104378	Gm37510	1.1512	0.083		3.336	2.9133	2.671	4.1063	4.8261	3.4417
ENSMUSG00000042116	Vwa1	1.1504	0.0839		3.9241	4.6554	4.7064	4.7371	5.9604	6.0398
ENSMUSG00000083669	Mif-ps4	1.1504	0.0379		3.336	3.4682	3.7522	4.2564	4.7141	5.0372
ENSMUSG00000029095	Ablim2	1.149	0.2524		4.5429	5.7166	4.6164	7.2236	6.6497	4.4496
ENSMUSG00000020130	Tbc1d15	1.1484	0.2508		10.7194	10.6513	8.6761	12.0269	11.7065	9.7587
ENSMUSG00000045007	Tubg2	1.1483	0.0693		5.5449	6.4289	5.4937	6.9863	7.6128	6.3133
ENSMUSG00000025355	Mmp19	1.1477	0.0734		3.336	3.2173	3.252	5.248	3.9684	4.0319
ENSMUSG00000087222	E030042O20Rik	1.1466	0.0215		4.6045	4.1086	4.3068	5.4794	5.397	5.5831
ENSMUSG00000030309	Caprin2	1.1454	0.006		8.6118	8.2868	8.4538	9.6306	9.8934	9.2645
ENSMUSG00000100967	Gm29666	1.1453	0.0145		4.8782	5.1971	4.9835	6.0923	6.1659	6.2365
ENSMUSG00000068587	Mgam	1.1446	0.1018		3.183	2.9133	3.1272	4.8827	4.5279	3.2468
ENSMUSG00000026259	Ngef	1.1443	0.2743		7.8174	8.4777	6.23	9.3062	9.509	7.1427
ENSMUSG00000056131	Pgm3	1.1443	0.0115		8.5892	8.3777	8.8467	9.2779	9.8477	10.1208
ENSMUSG00000102759	Gm10463	1.1437	0.0911		3.6006	3.0733	3.5724	5.318	4.5926	3.7668
ENSMUSG00000111664	Gm48865	1.1435	0.0216		4.5429	4.7051	4.3068	5.9003	5.5019	5.5831
ENSMUSG00000101603	Gm28730	1.1432	0.0264		4.0176	4.0328	4.1868	5.0566	5.0269	5.5831
ENSMUSG00000085795	Zfp703	1.1431	0.0063		9.0005	9.1352	8.6817	10.4167	10.0327	9.7971
ENSMUSG00000037363	Letm2	1.1409	0.0506		6.4653	7.0162	6.9907	8.7701	7.6128	7.5118
ENSMUSG00000110357	A030001D20Rik	1.1406	0.0701		5.5449	6.0408	5.4422	7.6128	6.7382	6.0988
ENSMUSG00000109363	Gm44668	1.1385	0.0734		5.4135	5.8985	4.5204	6.2074	6.9133	6.1274
ENSMUSG00000031337	Mtm1	1.1383	0.0092		8.1052	8.2454	7.9495	9.3857	9.5278	8.8013
ENSMUSG00000097352	C920009B18Rik	1.1377	0.0316		5.0205	4.2493	4.8317	5.6246	6.0782	5.8119
ENSMUSG00000079608	Stard6	1.1373	0.023		5.9761	5.5634	6.0002	7.1196	6.5553	7.2765
ENSMUSG00000020228	Helb	1.1357	0.0044		9.29	9.0892	9.5141	10.4385	10.6922	10.1698
ENSMUSG00000027424	Mgme1	1.1353	0.0096		8.523	8.1854	8.8663	9.7462	9.3424	9.8919
ENSMUSG00000051343	Rab11fip5	1.1352	0.0056		12.1989	12.3286	12.4261	13.431	13.0821	13.846
ENSMUSG00000038167	Plekhg6	1.1343	0.349		4.0176	5.089	3.252	6.5061	6.0086	3.2468
ENSMUSG00000037822	Smim14	1.1342	0.0011		10.6269	10.5664	10.3544	11.6268	11.6586	11.665
ENSMUSG00000041923	Nol4	1.1337	0.0107		6.3441	6.793	6.8595	7.9358	7.7959	7.666
ENSMUSG00000118032	Gm50147	1.1334	0.1455		2.3266	2.7334	2.8396	4.7873	3.7586	2.7541
ENSMUSG00000042599	Kdm7a	1.1325	0.0175		10.1882	10.4326	9.5974	11.354	11.5271	10.7346
ENSMUSG00000032000	Birc3 ENSMUSG00000032000	1.1321	0.0144		7.7024	7.6637	8.0301	8.4264	9.1674	9.1986
ENSMUSG00000033863	Klf9	1.1321	0.0924		10.3373	10.7434	9.1228	11.6651	11.4549	10.4797
ENSMUSG00000017677	Wsb1	1.132	0.011		13.0452	13.4582	12.7934	14.502	14.3775	13.8133
ENSMUSG00000036854	Hspb6	1.1308	0.0043		8.4494	8.299	8.1189	9.6185	9.4226	9.2187
ENSMUSG00000065611	Mir23a	1.1305	0.0415		4.7748	4.1086	4.9835	5.417	5.8321	6.0094
ENSMUSG00000032652	Crebl2	1.1298	0.0352		8.7271	8.6714	8.2481	10.3102	9.757	8.9688
ENSMUSG00000052485	Tmem171	1.1296	0.0117		10.7401	10.711	10.9201	11.4719	11.8004	12.4877
ENSMUSG00000072889	Nfxl1	1.1289	0.0097		10.0205	10.1278	9.2517	10.8944	11.0351	10.8572
ENSMUSG00000037239	Spred3	1.1278	0.0021		9.1576	9.2443	9.0322	10.3794	10.1011	10.3369
ENSMUSG00000103591	Gm38365	1.1269	0.0455		4.1054	3.7779	3.4733	4.4559	5.2441	5.0372
ENSMUSG00000096960	A230028O05Rik	1.1254	0.067		2.8174	3.3482	2.671	4.6311	3.9684	3.6134
ENSMUSG00000030271	Ogg1	1.1243	0.0021		8.9058	8.771	8.9812	10.1371	9.9792	9.9146
ENSMUSG00000005667	Mthfd2	1.124	0.0058		11.2942	10.5906	11.2305	12.2243	12.0205	12.2424
ENSMUSG00000029227	Fip1l1	1.1237	0.001		11.4027	11.2539	11.4936	12.5271	12.4944	12.4997
ENSMUSG00000097245	Gm5421	1.1235	0.0511		3.0117	3.0733	2.48	3.9387	3.641	4.3559
ENSMUSG00000021113	Snapc1	1.1231	0.0068		8.4784	8.4156	8.0941	9.6945	9.5298	9.1331
ENSMUSG00000046402	Rbp1	1.1231	0.0914		3.4743	2.2879	2.671	4.3924	3.9684	3.4417
ENSMUSG00000053716	Dusp7	1.1231	0.0459		9.8906	9.7122	9.2777	11.1315	11.2284	9.8898
ENSMUSG00000033762	Recql4	1.1217	0.0187		8.3131	7.9114	8.4603	9.0372	9.1188	9.894
ENSMUSG00000110256	Gm45412	1.1215	0.0529		3.4743	3.7779	3.3669	4.1833	4.5926	5.2077
ENSMUSG00000086368	Gm13830	1.1204	0.026		4.0176	4.3148	4.1868	5.1362	5.1611	5.5831
ENSMUSG00000084799	Ino80dos	1.1203	0.0157		6.1095	6.3054	5.8699	7.4431	7.2708	6.9318
ENSMUSG00000085196	Gm14963	1.12	0.0187		4.3407	4.3148	4.4176	5.417	5.4329	5.5831
ENSMUSG00000046269	Usp27x	1.1197	0.0147		7.2989	7.4902	7.8143	8.2361	8.7654	8.9609
ENSMUSG00000033166	Dis3	1.118	0.0037		10.4797	9.9842	10.5914	11.43	11.5177	11.4616
ENSMUSG00000040187	Arntl2	1.1179	0.0261		6.1718	6.6607	7.2371	7.8557	7.8164	7.7513
ENSMUSG00000050565	Tor1aip2	1.1166	0.0036		12.4122	12.0754	12.3966	13.6562	13.1593	13.4185
ENSMUSG00000020181	Nav3	1.1161	0.1324		3.336	2.7334	3.6651	5.318	4.1515	3.6134
ENSMUSG00000117332	Gm49942	1.1161	0.08		2.3266	2.9133	3.252	3.9387	4.46	3.4417
ENSMUSG00000003868	Ruvbl2	1.1159	0.0024		11.0581	11.0688	11.4078	12.118	12.4714	12.2931
ENSMUSG00000021595	Nsun2	1.1158	0.0015		11.8206	11.6921	11.8871	12.7608	13.0656	12.9207
ENSMUSG00000032712	Resf1	1.1154	0.0336		11.7324	11.3167	11.3631	13.3026	12.5482	11.9076
ENSMUSG00000021559	Dapk1	1.1151	0.0525		4.4113	5.051	5.6379	6.3972	6.0086	6.0398
ENSMUSG00000045251	Zfp688	1.1149	0.005		7.881	8.2157	8.233	9.359	9.2921	9.0232
ENSMUSG00000053574	4930563E22Rik	1.1115	0.049		4.5429	5.162	5.5914	5.9452	6.1006	6.5849
ENSMUSG00000024410	Rmc1	1.1111	0.0028		8.8874	8.7999	8.9237	10.1575	10.0166	9.7701
ENSMUSG00000031711	Zfp330	1.1111	0.0021		9.7427	9.7992	10.0938	10.9574	10.8968	11.1147
ENSMUSG00000036712	Cyld	1.1108	0.0022		11.0429	10.905	11.2094	12.3552	12.1749	11.9597
ENSMUSG00000029415	Sdad1	1.1106	0.0014		10.3531	10.1858	10.4199	11.3451	11.3909	11.5548
ENSMUSG00000026785	Pkn3	1.1105	0.0047		7.8995	7.948	7.7363	8.8609	9.1754	8.8791
ENSMUSG00000041084	Ostc	1.1104	0.0125		10.6806	10.3364	11.161	11.6659	11.6271	12.216
ENSMUSG00000054027	Nt5dc3	1.1102	0.0023		8.8078	8.8778	8.76	10.0421	9.9731	9.761
ENSMUSG00000007617	Homer1	1.109	0.0012		9.5893	9.5363	9.5855	10.7364	10.667	10.6347
ENSMUSG00000007812	Zfp655	1.1075	0.0069		10.6036	10.6337	10.3837	12.0939	11.5328	11.3169
ENSMUSG00000107136	Gm42466	1.1074	0.1099		2.5928	3.2173	2.48	3.1248	3.8673	4.6204
ENSMUSG00000021693	Kif2a	1.1072	0.1071		11.0233	10.8215	9.5751	11.9032	12.1224	10.7159
ENSMUSG00000050944	Efcab5	1.1065	0.2646		4.8274	5.0121	4.2481	7.1583	6.1006	4.1482
ENSMUSG00000114409	Gm9042	1.1063	0.1632		2.5928	2.2879	2.2599	2.558	4.6546	3.2468
ENSMUSG00000087443	Ppp1r18os	1.1057	0.0484		3.183	2.7334	3.4733	4.1063	4.0629	4.5375
ENSMUSG00000064342	mt-Ti	1.1055	0.1272		3.7167	3.4682	4.7064	4.9723	4.3889	5.8468
ENSMUSG00000103122	Gm37391	1.1054	0.1474		2.3266	4.0328	2.671	3.5306	4.46	4.3559
ENSMUSG00000006301	Tmbim1	1.1052	0.0012		9.612	9.6358	9.756	10.7491	10.7695	10.8005
ENSMUSG00000029777	Gars	1.1052	0.0058		12.7288	12.107	12.6321	13.4819	13.4898	13.8117
ENSMUSG00000098113	Gm2445	1.1048	0.1185		3.8241	2.2879	3.1272	3.6439	4.46	4.4496
ENSMUSG00000037649	H2-DMa	1.1044	0.0268		5.9526	5.8985	6.26	7.1294	6.7093	7.5858
ENSMUSG00000044966	Fbxo48	1.1032	0.0257		7.2322	6.9036	6.9544	8.7031	7.9827	7.714
ENSMUSG00000035840	Lysmd3	1.1022	0.0018		9.8609	9.8539	9.5885	10.922	10.912	10.7759
ENSMUSG00000026718	Stam	1.102	0.0025		10.495	10.5168	10.3666	11.7439	11.6525	11.2879
ENSMUSG00000038225	Primpol	1.1016	0.0022		8.7814	8.6869	8.8809	9.8249	9.9883	9.841
ENSMUSG00000039474	Wfs1	1.1014	0.016		10.5351	10.7559	9.998	11.7711	11.7622	11.0601
ENSMUSG00000026430	Rassf5	1.1011	0.0231		7.8239	7.3874	7.2219	9.0527	8.5127	8.1711
ENSMUSG00000039740	Alg2	1.1011	0.02		10.494	10.8983	9.9048	11.7538	11.7088	11.1377
ENSMUSG00000021213	Akr1c13	1.1008	0.0065		8.9119	8.456	8.6222	10.0537	9.536	9.7028
ENSMUSG00000020458	Rtn4	1.1007	0.0023		12.9333	13.0613	13.2735	14.0842	14.229	14.2568
ENSMUSG00000020641	Rsad2	1.0996	0.1196		4.1054	4.4375	3.6651	5.9672	5.2839	4.2558
ENSMUSG00000027379	Bub1	1.0994	0.0043		11.1882	10.6281	11.1329	12.0227	12.2565	11.9682
ENSMUSG00000104687	Gm42899	1.0983	0.0922		3.336	3.7779	4.5204	4.575	4.7712	5.5831
ENSMUSG00000020042	Btbd11	1.0982	0.1048		8.0117	8.6651	7.4078	9.6895	9.5048	8.1848
ENSMUSG00000042042	Csgalnact2	1.0979	0.0035		9.8703	9.5852	9.439	10.9367	10.6231	10.6285
ENSMUSG00000041341	Atg2b	1.0977	0.0032		10.4059	10.7552	10.5023	11.8269	11.74	11.3896
ENSMUSG00000105656	Gm43017	1.0976	0.0516		4.0176	4.1806	3.9121	4.5167	5.4329	5.4535
ENSMUSG00000000154	Slc22a18	1.0973	0.2195		4.1054	5.1971	3.6651	6.2793	5.8321	4.1482
ENSMUSG00000044857	Lemd2	1.097	0.0022		10.0813	10.3666	10.4365	11.4096	11.5172	11.2485
ENSMUSG00000098066	Gm26944	1.0969	0.0438		5.3787	5.051	4.5204	5.6788	6.2486	6.3133
ENSMUSG00000030718	Ppme1	1.0959	0.005		10.5132	10.8397	10.6329	11.3844	11.9908	11.8983
ENSMUSG00000097259	Gm26766	1.0959	0.0494		3.7167	3.3482	4.1229	5.1745	4.5279	4.7731
ENSMUSG00000029338	Antxr2	1.0943	0.0072		9.9451	10.0458	10.4561	11.5937	11.1612	10.975
ENSMUSG00000037321	Tap1	1.0941	0.1147		6.6518	6.2053	6.4544	8.6293	7.2609	6.7037
ENSMUSG00000022863	Btg3	1.0938	0.0141		6.7504	7.026	6.4282	7.7956	8.0244	7.666
ENSMUSG00000087252	Gm14379	1.0936	0.0656		3.0117	2.9133	3.8344	4.1063	4.2351	4.6988
ENSMUSG00000025981	Coq10b	1.0932	0.0041		9.7306	9.4276	9.9664	10.9388	10.6309	10.8346
ENSMUSG00000042804	Gpr153	1.0928	0.038		3.336	3.6819	3.1272	4.575	4.5926	4.2558
ENSMUSG00000057554	Lgals8	1.0926	0.0012		10.7915	10.8862	10.7559	11.8053	12.012	11.8941
ENSMUSG00000040599	Mis12	1.0918	0.0123		10.3259	9.8134	9.9107	11.5719	11.0212	10.7323
ENSMUSG00000022360	Atad2	1.0916	0.0146		12.2969	11.7312	12.1959	13.6751	12.9904	12.8333
ENSMUSG00000116165	Pdxp	1.091	0.0345		5.6362	6.6224	6.1837	6.9755	7.2609	7.4788
ENSMUSG00000106028	Gm8493	1.0909	0.0452		3.4743	4.0328	4.3068	4.7873	5.2032	5.0963
ENSMUSG00000037851	Iars	1.0907	0.0026		12.5215	12.1511	12.1888	13.4384	13.4837	13.2113
ENSMUSG00000030089	Slc41a3	1.0897	0.0137		7.045	7.1114	7.191	8.5874	8.1801	7.849
ENSMUSG00000078622	Ccdc47	1.0895	0.0025		11.4761	11.5188	11.1344	12.3095	12.4904	12.5979
ENSMUSG00000104877	Gm42651	1.0893	0.1474		3.0117	3.7779	3.4733	3.4076	5.0269	5.0963
ENSMUSG00000118210	Gm50394	1.0892	0.0559		3.336	3.0733	3.252	3.847	4.8261	4.2558
ENSMUSG00000074656	Eif2s2	1.0886	0.0044		12.2107	11.8089	12.3657	13.0174	13.3216	13.3123
ENSMUSG00000085936	2610307P16Rik	1.0884	0.1808		4.4113	3.579	5.7898	5.4486	5.3603	6.2365
ENSMUSG00000036057	Ptpn23	1.0876	0.026		10.8491	10.9089	10.3404	12.278	11.9247	11.1587
ENSMUSG00000093726	Gm20667	1.0876	0.0092		6.5615	6.515	6.4544	7.4273	7.7398	7.6265
ENSMUSG00000035356	Nfkbiz	1.0868	0.0138		9.6635	10.522	10.5691	11.2808	11.2467	11.4874
ENSMUSG00000028042	Zbtb7b	1.0856	0.0027		10.596	10.5714	10.3777	11.7812	11.3369	11.6838
ENSMUSG00000034768	Asb16	1.0853	0.0571		5.6064	5.3918	4.8317	6.2793	6.9259	5.8808
ENSMUSG00000106166	Gm43484	1.0842	0.0601		4.4786	3.9527	4.4699	4.8358	5.9104	5.4076
ENSMUSG00000106475	Gm43011	1.0841	0.0217		5.722	5.5901	5.3614	6.7909	6.8217	6.3133
ENSMUSG00000025558	Dock9	1.0838	0.0311		9.8322	9.969	9.6705	11.2786	11.3059	10.1385
ENSMUSG00000112880	Gm20337	1.0829	0.0899		3.9241	3.3482	4.3632	5.417	4.314	5.153
ENSMUSG00000051650	B3gnt2	1.0823	0.0288		4.1054	4.2493	4.2481	5.5683	5.2441	5.0372
ENSMUSG00000024552	Slc14a2	1.0819	0.1974		3.336	4.1086	2.8396	3.4076	5.5019	4.6204
ENSMUSG00000023947	Nfkbie	1.081	0.0429		7.0671	6.6732	7.9026	8.0787	8.247	8.5603
ENSMUSG00000115602	Gm7908	1.0809	0.0846		3.6006	3.3482	3.252	3.847	4.3889	5.2077
ENSMUSG00000002105	Slc39a13	1.0808	0.0046		10.1756	10.1037	10.3829	11.4994	10.9534	11.4517
ENSMUSG00000071796	6820431F20Rik	1.08	0.0059		7.7234	7.425	7.3875	8.6361	8.5901	8.5497
ENSMUSG00000028435	Aqp3	1.0796	0.3517		3.0117	5.3918	2.8396	5.7565	5.2839	3.4417
ENSMUSG00000109032	Gm7972	1.0795	0.0655		3.183	3.6819	2.9906	4.8827	4.0629	4.1482
ENSMUSG00000103343	Gm37052	1.0786	0.0458		4.8782	5.1971	5.1207	5.6246	6.1227	6.6846
ENSMUSG00000105350	4930537H20Rik	1.0783	0.1081		3.0117	2.2879	3.252	3.4076	3.7586	4.6204
ENSMUSG00000032839	Trpc1	1.0781	0.0208		8.0729	7.8575	7.4797	9.3652	8.6673	8.6118
ENSMUSG00000084013	Gm14270	1.0781	0.0873		3.6006	3.0733	3.4733	3.9387	4.2351	5.2077
ENSMUSG00000049871	Nlrc3	1.078	0.1766		3.183	3.579	3.7522	5.652	4.6546	3.4417
ENSMUSG00000110206	Flt3l	1.0778	0.0401		3.7167	3.868	3.7522	4.4559	5.2032	4.9112
ENSMUSG00000108095	Gm44067	1.0763	0.0567		3.336	3.0733	3.9121	4.3924	4.314	4.8438
ENSMUSG00000045302	Preb	1.0759	0.0088		10.2936	10.2119	9.6816	11.3762	11.2181	10.8204
ENSMUSG00000085347	Hk1os	1.0755	0.0509		5.6654	5.7407	5.3334	7.0494	6.9384	5.9783
ENSMUSG00000090150	Acad11	1.0746	0.0104		8.5777	8.7445	8.0773	9.7382	9.5826	9.3027
ENSMUSG00000022286	Grhl2	1.0737	0.1858		8.5854	9.1329	7.4475	10.4277	9.5422	8.4169
ENSMUSG00000027408	Cpxm1	1.0733	0.1066		3.336	3.0733	2.671	4.9282	3.7586	3.6134
ENSMUSG00000006732	Mettl1	1.0732	0.0296		8.4282	8.1985	9.1208	9.4974	9.3471	10.1226
ENSMUSG00000032666	1700025G04Rik	1.0723	0.0142		9.372	9.0512	9.1769	10.7017	10.3474	9.7679
ENSMUSG00000101849	Gm28386	1.0718	0.13		2.3266	2.2879	3.3669	3.5306	3.2167	4.4496
ENSMUSG00000085287	4833418N02Rik	1.0716	0.0618		4.7748	4.7051	5.4682	5.6788	5.8587	6.6256
ENSMUSG00000112742	Gm31793	1.0707	0.0426		5.0205	4.3148	5.1531	5.652	6.0086	6.0398
ENSMUSG00000020799	Tekt1	1.0706	0.1936		3.0117	3.9527	2.671	5.2117	4.3889	3.2468
ENSMUSG00000032637	Atxn2l	1.0706	0.0092		11.9253	11.7824	11.4157	13.16	12.7429	12.4325
ENSMUSG00000031284	Pak3	1.0702	0.0212		8.924	9.0343	9.7704	10.709	10.1584	10.072
ENSMUSG00000046962	Zbtb21	1.0696	0.0058		10.1134	10.4363	10.3726	11.7215	11.0689	11.3408
ENSMUSG00000086849	Gm13840	1.0692	0.0966		3.7167	3.579	3.4733	4.0249	5.5019	4.4496
ENSMUSG00000040128	Pnrc1	1.0686	0.0061		11.7402	12.0892	11.4344	12.9907	12.8658	12.6132
ENSMUSG00000110038	Gm45570	1.0684	0.0764		2.8174	3.3482	2.8396	4.685	3.7586	3.7668
ENSMUSG00000015653	Steap2	1.0681	0.0165		12.2465	11.957	12.4278	12.7786	13.302	13.7549
ENSMUSG00000036214	Polr1has	1.0677	0.0284		6.5459	6.3214	6.7891	8.1136	7.4822	7.2637
ENSMUSG00000066232	Ipo7	1.0676	0.0048		13.3283	13.3031	13.1113	14.3452	14.5784	14.0218
ENSMUSG00000039840	Epg5	1.0671	0.005		9.5507	9.4146	9.4826	10.8879	10.4934	10.2679
ENSMUSG00000037940	Inpp4b	1.0664	0.0863		3.0117	3.2173	2.48	3.9387	4.5279	3.4417
ENSMUSG00000027035	Cers6	1.0657	0.1618		6.289	5.833	7.289	7.7071	6.5553	8.3456
ENSMUSG00000063659	Zbtb18	1.0656	0.0019		11.0394	10.9215	11.0823	12.2562	11.9073	12.0767
ENSMUSG00000022241	Tars	1.0653	0.0083		11.7112	11.2566	11.872	12.3756	12.7116	12.9483
ENSMUSG00000025648	Pfkfb4	1.0653	0.1297		6.6949	6.7581	6.7473	8.7031	8.0477	6.6455
ENSMUSG00000092626	9130230N09Rik	1.0651	0.1055		3.336	3.868	3.4733	5.3848	3.8673	4.6204
ENSMUSG00000026153	Fam135a	1.0644	0.0044		10.541	10.2594	10.0844	11.5634	11.3891	11.1254
ENSMUSG00000031015	Swap70	1.0639	0.0021		10.2057	10.2129	10.3794	11.4096	11.445	11.1351
ENSMUSG00000002057	Foxn1	1.0633	0.2873		3.4743	6.0601	3.3669	5.8773	5.1178	5.0963
ENSMUSG00000103132	Gm37978	1.0623	0.1057		4.1054	4.3774	3.7522	4.2564	5.5019	5.6635
ENSMUSG00000015880	Ncapg	1.0622	0.0043		11.1756	10.6078	11.0865	12.1387	11.9581	11.9597
ENSMUSG00000115252	Gm48996	1.062	0.0665		4.8782	5.162	5.019	5.318	6.4717	6.4555
ENSMUSG00000088689	Scarna17	1.0619	0.058		5.8291	6.0601	6.3325	6.7661	6.7666	7.8746
ENSMUSG00000042029	Ncapg2	1.0597	0.0358		11.3339	10.6607	10.8589	12.6212	12.0227	11.3888
ENSMUSG00000110400	Gm45416	1.0596	0.0619		3.6006	2.9133	3.5724	4.1833	4.8261	4.2558
ENSMUSG00000033653	Vps8	1.0593	0.0033		9.0973	9.1666	9.285	10.4773	10.145	10.1047
ENSMUSG00000104315	Gm37906	1.0589	0.0284		5.722	5.5084	5.7898	6.2968	7.0348	6.8654
ENSMUSG00000078671	Chd2	1.0586	0.0215		11.5903	11.5253	11.2041	13.1375	12.1313	12.2268
ENSMUSG00000023919	Cenpq	1.0582	0.006		9.462	8.9773	9.6091	10.3463	10.3695	10.5072
ENSMUSG00000031367	Ap1s2	1.0582	0.0077		8.8337	8.6651	8.69	9.7446	10.1503	9.4684
ENSMUSG00000023908	Pkmyt1	1.0576	0.0053		9.6904	9.1908	9.744	10.6534	10.4547	10.6898
ENSMUSG00000026814	Eng	1.0571	0.132		4.8782	4.2493	5.5914	6.2074	5.1611	6.5217
ENSMUSG00000023087	Noct	1.055	0.0052		10.4879	10.0815	10.3965	11.1556	11.2962	11.679
ENSMUSG00000039908	Slc26a11	1.0548	0.0098		7.562	7.7784	7.5051	8.7031	8.9311	8.3758
ENSMUSG00000104214	Gm36638	1.0545	0.0454		4.1881	4.604	3.9121	4.9723	5.5353	5.3601
ENSMUSG00000105789	Gm42997	1.0535	0.0829		2.8174	2.2879	3.252	3.749	3.5129	4.2558
ENSMUSG00000026356	Dars	1.0523	0.0019		11.3288	11.1022	11.4528	12.3143	12.3156	12.4109
ENSMUSG00000105707	Gm43753	1.0497	0.0494		3.4743	3.3482	2.8396	4.3924	4.0629	4.3559
ENSMUSG00000024038	Ndufv3	1.0496	0.002		10.2581	10.4582	10.2061	11.2665	11.5025	11.3021
ENSMUSG00000024989	Cep55	1.0495	0.0075		11.0254	10.6062	10.8674	11.616	12.2693	11.7623
ENSMUSG00000108268	Gm44187	1.0495	0.026		6.0664	5.6163	5.9083	6.8629	7.2509	6.6256
ENSMUSG00000097675	1700101I11Rik	1.0493	0.1176		3.336	2.7334	2.9906	4.9282	3.5129	3.7668
ENSMUSG00000029408	Abcb9	1.0487	0.1851		5.4807	6.079	4.5692	7.0799	6.8351	5.3601
ENSMUSG00000037991	Rmi2	1.0479	0.0202		7.1102	6.6607	7.3035	7.8017	8.3301	8.0862
ENSMUSG00000103697	Gm38020	1.0477	0.0373		4.2664	3.9527	4.4176	5.2117	5.0269	5.5412
ENSMUSG00000073867	AA474408	1.0474	0.1101		5.2303	5.0121	4.9096	7.0494	5.8848	5.3601
ENSMUSG00000074802	Gas2l3	1.0469	0.0122		11.3087	10.6313	10.9985	12.4108	11.9227	11.7457
ENSMUSG00000037010	Apln	1.0466	0.2249		5.2303	6.2728	7.7628	6.8629	7.7109	7.8317
ENSMUSG00000031960	Aars	1.0465	0.0051		13.0995	12.5717	13.0833	14.0366	13.8661	13.9912
ENSMUSG00000045730	Adrb2	1.0465	0.1374		2.5928	3.2173	2.9906	4.326	4.5926	3.0214
ENSMUSG00000088892	NA	1.0463	0.1209		2.3266	2.9133	2.671	2.9594	3.641	4.4496
ENSMUSG00000059412	Fxyd2	1.0456	0.1227		4.1054	3.6819	2.671	4.7371	4.8261	4.0319
ENSMUSG00000058748	Zfp958	1.0447	0.0044		8.8111	8.6366	8.5752	9.8398	9.8209	9.4961
ENSMUSG00000116771	Gm49691	1.0446	0.1735		2.5928	2.2879	2.671	4.3924	3.8673	2.4258
ENSMUSG00000093044	Snord8	1.0441	0.0551		2.8174	3.2173	3.252	3.749	4.314	4.3559
ENSMUSG00000085492	Trmt61b	1.0439	0.0211		7.2224	7.5252	7.6195	8.0737	8.5211	8.9042
ENSMUSG00000109801	Olfr1316	1.0439	0.209		3.9241	3.2173	2.2599	4.9723	4.314	3.2468
ENSMUSG00000032258	Lca5	1.0432	0.0614		8.0619	7.7609	7.3107	9.1422	9.1406	7.9803
ENSMUSG00000030064	Frmd4b	1.043	0.0289		9.574	9.5431	8.6982	10.2353	10.7224	9.9867
ENSMUSG00000032413	Rasa2	1.0429	0.0123		9.3631	9.3398	8.9447	10.2853	10.6309	9.8603
ENSMUSG00000112008	Gm47218	1.0406	0.0846		4.1054	3.868	3.1272	5.2117	4.6546	4.3559
ENSMUSG00000102714	Gm37618	1.0405	0.1503		3.183	3.868	3.1272	4.326	5.3603	3.6134
ENSMUSG00000102191	Gm36569	1.0402	0.2988		2.8174	2.5278	3.4733	4.3924	2.339	5.2077
ENSMUSG00000021759	Plpp1	1.0395	0.0142		8.2519	8.2621	8.7731	9.1422	9.475	9.7882
ENSMUSG00000043903	Zfp469	1.0377	0.1752		8.4825	8.5095	8.2556	10.7428	9.3282	8.2898
ENSMUSG00000104591	Gm43145	1.0371	0.1737		2.5928	2.7334	2.48	2.558	4.5926	3.7668
ENSMUSG00000037573	Tob1	1.037	0.2417		10.6554	10.5955	8.9744	11.9825	11.5369	9.817
ENSMUSG00000019734	Tmc4	1.0366	0.1127		5.8798	7.5795	6.1197	7.3625	7.7611	7.5651
ENSMUSG00000087610	Gm16253	1.0365	0.0604		3.183	3.2173	2.8396	3.749	4.0629	4.5375
ENSMUSG00000107698	Gm44430	1.0365	0.0689		3.8241	3.4682	4.2481	4.3924	5.1611	5.0963
ENSMUSG00000030556	Lrrc28	1.0364	0.0356		8.7026	8.5576	8.6135	10.4017	9.3495	9.2319
ENSMUSG00000005802	Slc30a4	1.0353	0.0016		11.0711	11.0026	10.8723	12.037	12.1121	11.9029
ENSMUSG00000062510	Nsl1	1.0352	0.0125		8.9716	8.4633	9.0278	10.1383	9.5381	9.8919
ENSMUSG00000048264	Dip2c	1.0344	0.0087		10.1318	10.2708	9.7872	11.4637	10.9914	10.8378
ENSMUSG00000022791	Tnk2	1.0341	0.0022		11.0163	11.0503	11.2003	11.958	12.1166	12.2946
ENSMUSG00000086547	Gm11755	1.0336	0.1567		2.5928	3.3482	2.671	4.8827	3.2167	3.6134
ENSMUSG00000035047	Kri1	1.0333	0.0067		9.2278	9.0608	9.2004	9.8384	10.2863	10.4643
ENSMUSG00000025500	Lmntd2	1.0332	0.0331		7.5775	8.331	7.6539	9.0578	9.199	8.4053
ENSMUSG00000025666	Tmem47	1.0331	0.1112		5.6654	5.4801	5.5676	7.1487	7.0807	5.5831
ENSMUSG00000048787	Dcun1d3	1.0329	0.0033		8.8905	8.8778	8.8292	10.0841	9.851	9.761
ENSMUSG00000035941	Ibtk	1.0325	0.0016		10.4422	10.3185	10.2003	11.3388	11.3766	11.3431
ENSMUSG00000005803	Sqor	1.0318	0.0128		10.0663	10.1704	9.6649	11.0764	11.3416	10.5789
ENSMUSG00000112254	Gm47690	1.0316	0.1025		4.2664	4.604	4.6621	4.685	6.1659	5.7762
ENSMUSG00000030528	Blm	1.0311	0.0104		9.9775	9.3806	9.6899	10.9643	10.8084	10.3687
ENSMUSG00000054277	Arfgap3	1.0311	0.0037		9.2923	9.5567	9.135	10.2522	10.4094	10.4159
ENSMUSG00000038217	Tlcd2	1.0309	0.0438		4.6635	4.3148	4.1868	5.806	5.2441	5.2077
ENSMUSG00000040010	Slc7a5	1.0309	0.0055		11.8708	11.2175	11.4528	12.4403	12.6075	12.586
ENSMUSG00000039903	Eva1c	1.0308	0.1659		5.2689	5.3298	5.1531	6.7151	7.0919	5.0372
ENSMUSG00000108954	Gm44901	1.0306	0.018		6.2701	6.0408	5.8503	7.039	6.9631	7.2507
ENSMUSG00000064023	Klk8	1.0305	0.1928		2.3266	2.5278	2.48	3.4076	4.5926	2.4258
ENSMUSG00000022263	Trio	1.0301	0.0052		12.3288	12.4076	12.4234	13.785	13.2182	13.247
ENSMUSG00000033705	Stard9	1.0298	0.0186		6.4818	6.4869	6.6141	7.3459	7.9273	7.3989
ENSMUSG00000111491	Gm47503	1.0297	0.0717		3.336	3.7779	3.1272	3.9387	4.7712	4.6204
ENSMUSG00000118550	Gm52965	1.0288	0.1876		2.8174	3.0733	2.48	4.8358	3.8673	2.7541
ENSMUSG00000028613	Lrp8	1.0287	0.0734		10.8867	10.3235	10.2003	12.2192	11.6242	10.6533
ENSMUSG00000080626	Mir1192	1.0281	0.0595		3.336	3.0733	2.8396	4.1063	4.46	3.7668
ENSMUSG00000017146	Brca1	1.0278	0.0147		10.8975	10.3676	10.9979	12.1795	11.7179	11.4489
ENSMUSG00000032226	Gcnt3	1.0278	0.4911		5.065	6.4726	3.4733	6.8032	7.5243	3.7668
ENSMUSG00000110869	Gm49628	1.0268	0.0735		3.7167	4.3774	4.1868	4.575	5.2032	5.5831
ENSMUSG00000046005	D830044D21Rik	1.0266	0.0788		4.4113	4.7997	3.7522	5.318	5.7493	4.9755
ENSMUSG00000086806	Gm13054	1.0261	0.1269		3.183	2.9133	2.48	4.2564	3.0422	4.3559
ENSMUSG00000064337	mt-Rnr1	1.0257	0.2203		19.1068	19.1979	17.7146	20.0879	19.7884	19.2202
ENSMUSG00000031937	Vstm5	1.0244	0.0561		6.2119	6.8604	5.7267	7.0999	7.6437	7.1286
ENSMUSG00000025762	Larp1b	1.0241	0.0173		9.6957	8.9047	9.399	10.3598	10.0501	10.6619
ENSMUSG00000056121	Fez2	1.0241	0.0047		10.5152	10.2657	10.4722	11.2312	11.3363	11.7577
ENSMUSG00000106103	Gm43081	1.0236	0.0834		3.7167	3.579	3.7522	4.1833	4.5279	5.4076
ENSMUSG00000100002	Gm29642	1.0233	0.2497		2.5928	3.579	2.48	2.558	4.7141	4.4496
ENSMUSG00000030521	Mphosph10	1.023	0.0085		9.8371	9.7076	10.1857	10.7114	10.8024	11.2855
ENSMUSG00000027829	Ccnl1	1.0229	0.0026		10.4316	10.5168	10.6408	11.7375	11.3604	11.56
ENSMUSG00000089235	Gm23119	1.0224	0.083		7.3082	7.6254	8.2741	8.3449	8.3722	9.5579
ENSMUSG00000006050	Sra1	1.0218	0.0048		9.8859	9.7688	10.3138	10.91	11.0263	11.0976
ENSMUSG00000001588	Acap1	1.0213	0.0091		10.2364	10.1935	9.8391	11.0354	11.4893	10.8083
ENSMUSG00000042289	Hsd3b7	1.0211	0.0297		4.4113	4.6554	4.8712	5.7565	5.6614	5.5831
ENSMUSG00000117080	1700063J08Rik	1.021	0.1449		3.183	2.7334	3.8344	3.749	3.9684	5.0963
ENSMUSG00000006442	Srm	1.0203	0.0204		9.0947	8.4954	9.1471	9.8707	9.5965	10.3307
ENSMUSG00000068742	Cry2	1.0198	0.0092		9.4432	9.5618	9.0365	10.3608	10.6462	10.0939
ENSMUSG00000002799	Jag2	1.0185	0.2089		5.6654	7.3011	5.4158	7.0076	7.9522	6.4779
ENSMUSG00000035671	Zswim4	1.0185	0.0045		9.8193	9.8635	10.0802	11.1388	11.0167	10.6631
ENSMUSG00000105378	Gm42515	1.0181	0.0576		3.6006	4.1086	4.3632	4.7873	4.9793	5.3601
ENSMUSG00000028145	Them4	1.0178	0.0296		6.7367	6.7463	6.6024	7.5341	7.3665	8.2382
ENSMUSG00000032252	Glce	1.0168	0.0021		10.1383	10.2448	9.98	11.0694	11.2162	11.128
ENSMUSG00000097015	Gm26705	1.0166	0.1361		2.5928	2.9133	2.8396	4.7371	3.2167	3.4417
ENSMUSG00000026096	Osgepl1	1.0164	0.0073		7.6811	7.5795	7.768	8.798	8.4874	8.7924
ENSMUSG00000027667	Zfp639	1.0163	0.0087		9.3452	9.1951	9.6564	10.527	10.0801	10.6385
ENSMUSG00000031880	Rrad	1.0163	0.0093		9.7765	10.3791	10.1207	11.4251	10.968	10.9321
ENSMUSG00000079109	Pms2	1.0155	0.0064		9.0372	8.6302	9.171	9.878	9.933	10.0738
ENSMUSG00000036503	Rnf13	1.0154	0.002		10.4124	10.1946	10.3299	11.4384	11.2417	11.3029
ENSMUSG00000089542	Gm25835	1.0154	0.011		9.4516	10.0202	10.2404	11.0758	10.7843	10.8982
ENSMUSG00000106254	Gm42907	1.0151	0.052		4.6045	4.1806	4.1229	4.9723	5.7206	5.2603
ENSMUSG00000035566	Pcdh17	1.0148	0.3131		6.5142	4.0328	6.3466	7.6404	6.2883	6.0094
ENSMUSG00000022911	Arl13b	1.0144	0.0037		9.574	9.4874	9.6365	10.8359	10.4721	10.4332
ENSMUSG00000109394	A230057D06Rik	1.014	0.1244		2.8174	3.4682	2.671	4.5167	4.2351	3.2468
ENSMUSG00000028776	Tinagl1	1.0136	0.005		11.859	12.4116	11.9957	12.9792	13.2045	13.1232
ENSMUSG00000032116	Stt3a	1.0132	0.0034		12.1879	11.8346	11.9221	13.1864	12.8984	12.8996
ENSMUSG00000039372	Marchf4	1.0131	0.1611		3.183	3.3482	4.7064	4.9723	4.1515	5.153
ENSMUSG00000041189	Chrnb1	1.0126	0.008		9.685	9.7497	10.1319	10.8843	10.5728	11.1474
ENSMUSG00000032076	Cadm1	1.0117	0.0078		10.3842	10.2215	10.6134	11.6086	11.6032	11.0423
ENSMUSG00000001707	Eef1e1	1.0113	0.0151		9.04	8.8967	9.2941	9.6254	10.2161	10.4231
ENSMUSG00000007029	Vars	1.0111	0.0027		12.9304	12.8714	13.0342	13.9171	14.1207	13.8314
ENSMUSG00000113185	Gm47127	1.0091	0.0529		3.4743	3.0733	3.1272	3.9387	4.314	4.4496
ENSMUSG00000030595	Nfkbib	1.0078	0.0057		8.1523	8.081	8.4603	9.2174	9.2222	9.2773
ENSMUSG00000026679	Enkur	1.0077	0.0306		7.045	6.1879	6.3605	7.4969	7.5652	7.5546
ENSMUSG00000040231	Syngr4	1.0075	0.1128		4.4786	3.9527	4.1229	6.0518	4.8261	4.6988
ENSMUSG00000054999	Naaladl1	1.0071	0.0642		5.2689	5.051	5.2158	6.2074	6.7666	5.5831
ENSMUSG00000044083	Efcab8	1.0065	0.0508		3.7167	4.1086	3.8344	5.2117	4.93	4.5375
ENSMUSG00000104347	Gm37689	1.0064	0.1087		3.183	3.7779	3.252	4.3924	5.0731	3.7668
ENSMUSG00000103846	Gm37809	1.0058	0.152		2.5928	3.579	3.8344	3.6439	4.93	4.4496
ENSMUSG00000105259	Gm42874	1.0057	0.0872		3.183	2.7334	2.8396	3.4076	4.46	3.9054
ENSMUSG00000051008	4930412M03Rik	1.0045	0.0507		3.6006	3.0733	3.4733	4.1833	4.5279	4.4496
ENSMUSG00000109206	Gm45137	1.0045	0.0205		7.0888	6.9247	6.6024	7.5917	7.9083	8.1292
ENSMUSG00000020076	Ddx50	1.0044	0.0016		11.2564	11.179	11.3509	12.3437	12.2471	12.2085
ENSMUSG00000015542	Nat9	1.0042	0.0166		7.8303	8.22	8.3176	9.3632	9.275	8.7424
ENSMUSG00000031600	Vps37a	1.0039	0.0015		11.3593	11.185	11.2711	12.2581	12.3071	12.2619
ENSMUSG00000026429	Ube2t	1.0032	0.0103		8.1158	7.8464	8.4603	9.0216	9.1885	9.222
ENSMUSG00000090698	Apold1	1.0025	0.0484		5.065	5.0121	4.8317	6.2968	6.1659	5.4535
ENSMUSG00000029782	Tmem209	1.0021	0.0121		10.9724	10.3886	10.9318	11.8122	11.4351	12.0517
ENSMUSG00000014907	Naf1	1.0017	0.0032		9.0785	9.0962	8.9424	10.1611	10.0443	9.9167
ENSMUSG00000064145	Arih2	1.0017	0.0016		10.2473	10.3714	10.3378	11.3004	11.3748	11.2863
ENSMUSG00000065118	Gm23297	1.0017	0.0643		3.336	3.6819	3.7522	4.9723	4.6546	4.1482
ENSMUSG00000024927	Rela	1.0016	0.0031		11.2026	11.2875	11.2628	12.4622	12.0087	12.2867
ENSMUSG00000020589	Cyria	0.9996	0.3435		6.4486	7.3644	4.7494	7.2947	8.257	6.0094
ENSMUSG00000075015	Gm10801	0.9996	0.4061		3.336	3.2173	4.2481	4.3924	2.8436	6.5641
ENSMUSG00000111905	Gm48045	0.9993	0.1572		3.183	2.5278	3.252	3.1248	4.0629	4.7731
ENSMUSG00000049950	Rpp38	0.999	0.03		7.6523	7.4025	8.183	8.5624	8.5252	9.1471
ENSMUSG00000078247	Airn	0.9986	0.1867		4.6635	4.3774	4.1229	5.5393	6.3645	4.2558
ENSMUSG00000108368	Gm45053	0.9981	0.0683		4.8274	5.0121	4.4699	6.331	5.6614	5.3111
ENSMUSG00000040713	Creg1	0.9979	0.0162		7.6595	7.2008	7.6368	8.767	8.267	8.4569
ENSMUSG00000028718	Stil	0.9977	0.0176		10.0772	9.6034	9.8266	11.324	10.6968	10.4797
ENSMUSG00000060935	Tmem263	0.9974	0.0023		10.8891	10.7471	10.6479	11.6537	11.9061	11.7165
ENSMUSG00000035505	Cox18	0.9965	0.0119		8.5777	8.506	8.72	9.2059	9.6583	9.9289
ENSMUSG00000102919	Gm37726	0.9959	0.2047		3.6006	4.1086	4.3068	3.749	5.6309	5.6239
ENSMUSG00000027828	Ssr3	0.9946	0.0068		13.2418	12.9004	13.2725	14.3879	13.9051	14.1056
ENSMUSG00000024379	Tslp	0.9939	0.2816		3.8241	4.1086	5.0537	3.847	5.8848	6.2365
ENSMUSG00000051391	Ywhag	0.9939	0.042		12.3512	12.2804	11.3347	12.9833	13.3666	12.5982
ENSMUSG00000051341	Zfp52	0.9932	0.0167		9.6957	9.3535	9.3923	10.7057	10.7483	9.967
ENSMUSG00000115810	Gm49066	0.9931	0.0525		4.4786	4.604	4.947	5.4486	5.4329	6.1274
ENSMUSG00000098091	Gm16470	0.993	0.088		3.183	3.0733	2.9906	4.2564	4.5279	3.4417
ENSMUSG00000024580	Grpel2	0.9927	0.0041		9.6398	9.4331	9.8191	10.7851	10.5658	10.5194
ENSMUSG00000063145	Bbs5	0.9926	0.016		7.6883	7.6059	8.0388	8.6733	8.5294	9.1082
ENSMUSG00000025591	Tma16	0.9924	0.0361		8.3894	8.1228	8.9284	9.3693	9.0854	9.9631
ENSMUSG00000057561	Eif1a	0.9906	0.0144		12.0049	11.536	12.1886	12.8905	12.5788	13.2322
ENSMUSG00000087575	Gm12976	0.9897	0.1281		3.0117	3.4682	2.9906	3.847	4.9793	3.6134
ENSMUSG00000061082	Plac1	0.9891	0.3029		2.5928	2.9133	4.8712	4.3924	3.641	5.3111
ENSMUSG00000108478	Gm19514	0.9889	0.2184		3.183	3.6819	3.4733	3.1248	5.0269	5.153
ENSMUSG00000104316	Gm37909	0.9888	0.1272		3.8241	3.9527	3.5724	3.9387	4.879	5.498
ENSMUSG00000040466	Blvrb	0.9882	0.0262		7.5698	7.5928	7.2446	8.9267	8.3443	8.1007
ENSMUSG00000026596	Abl2	0.9876	0.0163		11.4108	11.3162	10.989	12.6501	12.2534	11.7754
ENSMUSG00000022586	Ly6i	0.9868	0.1052		2.5928	3.4682	2.9906	4.2564	4.314	3.4417
ENSMUSG00000027663	Zmat3	0.9867	0.1714		11.7652	11.2586	10.4315	13.056	12.2449	11.1147
ENSMUSG00000000058	Cav2	0.9852	0.0738		11.9295	11.4845	10.5326	12.5076	12.587	11.8078
ENSMUSG00000013076	Amotl1	0.9842	0.0029		11.7903	11.8871	11.8388	13.0007	12.8582	12.61
ENSMUSG00000086401	Gm15559	0.9842	0.1236		3.4743	3.4682	3.252	5.248	3.8673	4.0319
ENSMUSG00000111375	Btbd8	0.9834	0.0213		8.7847	9.0845	8.2667	9.9908	9.5965	9.4989
ENSMUSG00000103467	Gm38245	0.9831	0.0562		3.8241	3.6819	3.9858	4.3924	5.0731	4.9755
ENSMUSG00000089959	Gm16268	0.9827	0.1039		2.3266	3.0733	3.1272	3.847	3.3724	4.2558
ENSMUSG00000027859	Ngf	0.9824	0.286		6.289	5.3612	7.6595	7.6808	6.3645	8.2117
ENSMUSG00000113750	Gm5628	0.9813	0.1768		2.5928	3.0733	3.4733	4.685	3.0422	4.3559
ENSMUSG00000044320	1700001O22Rik	0.9812	0.1633		2.5928	2.5278	3.5724	4.6311	3.7586	3.2468
ENSMUSG00000039633	Lonrf1	0.9798	0.0387		8.1211	8.2157	7.4011	9.2265	8.9713	8.4793
ENSMUSG00000098234	Snhg6	0.9798	0.0594		9.1369	9.2189	9.9901	9.9624	10.239	11.084
ENSMUSG00000039496	Cdnf	0.9797	0.0302		5.0205	4.7997	4.6621	5.8539	5.7206	5.8468
ENSMUSG00000031765	Mt1	0.9792	0.072		10.3041	10.5002	11.1665	11.2923	11.1942	12.4217
ENSMUSG00000096923	A730071L15Rik	0.9791	0.05		3.183	3.3482	3.3669	4.5167	4.0629	4.2558
ENSMUSG00000028191	Bcl10	0.9789	0.004		10.0934	9.8893	10.3165	11.1881	10.9703	11.0776
ENSMUSG00000025938	Slco5a1	0.9785	0.3011		4.9746	6.5426	7.2521	6.0722	7.8631	7.7695
ENSMUSG00000109325	Krt8-ps	0.9783	0.0832		3.6006	3.2173	3.252	3.847	4.314	4.8438
ENSMUSG00000003824	Syce2	0.9777	0.0313		6.0881	6.6857	6.6822	7.196	7.6815	7.5118
ENSMUSG00000026064	Ptp4a1	0.9769	0.0524		6.1718	6.3529	6.9172	7.329	7.1031	7.9406
ENSMUSG00000110669	Gm10060	0.9767	0.136		4.7202	5.6673	6.0002	5.9672	6.2079	7.1427
ENSMUSG00000023979	Guca1b	0.9762	0.0986		4.1054	3.579	3.9121	4.4559	4.5279	5.5412
ENSMUSG00000084844	Hoxb3os	0.9756	0.0834		5.4475	5.9407	6.136	6.1121	7.1683	7.1705
ENSMUSG00000019986	Ahi1	0.9752	0.0123		10.0484	10.0897	9.8115	11.3472	10.9741	10.554
ENSMUSG00000046605	B3gntl1	0.9749	0.0122		7.3357	7.4543	7.7888	8.5035	8.3629	8.6369
ENSMUSG00000029784	Ssmem1	0.9746	0.072		3.336	3.579	3.9858	4.2564	4.5926	4.9755
ENSMUSG00000107085	Gm42883	0.9734	0.0751		3.0117	3.4682	2.671	3.847	3.9684	4.2558
ENSMUSG00000001542	Ell2	0.973	0.0068		9.3201	9.4803	9.1126	10.5445	10.1757	10.1119
ENSMUSG00000085633	Bloc1s6os	0.973	0.1214		2.8174	3.7779	3.9121	4.685	3.9684	4.7731
ENSMUSG00000111088	9430081H08Rik	0.9726	0.0537		4.6635	4.7997	4.947	5.9452	5.2839	6.0988
ENSMUSG00000102018	Iqank1	0.9721	0.2193		5.2689	5.6922	4.8712	7.5119	5.3226	5.914
ENSMUSG00000103308	Gm37800	0.9715	0.1152		5.4135	5.0121	5.7898	5.5967	6.5224	7.0107
ENSMUSG00000023800	Tiam2	0.9713	0.0098		8.5069	8.5338	8.7227	9.8279	9.6142	9.2352
ENSMUSG00000006638	Abhd1	0.9705	0.0332		5.9044	5.5634	5.5914	6.3479	6.9384	6.6846
ENSMUSG00000031004	Mki67	0.9704	0.0427		14.2751	13.5382	13.7239	15.3515	14.7549	14.3419
ENSMUSG00000014786	Slc9a5	0.9703	0.057		7.9117	8.1544	8.8065	9.8128	9.1964	8.7745
ENSMUSG00000034303	Ccdc15	0.97	0.0651		7.6003	7.0063	7.0434	8.7887	8.1853	7.5858
ENSMUSG00000019845	Tube1	0.9691	0.0159		8.3223	7.948	8.4954	8.9211	9.4556	9.2964
ENSMUSG00000085101	Platr16	0.9691	0.108		3.183	2.7334	3.5724	3.9387	3.7586	4.6988
ENSMUSG00000028189	Ctbs	0.9687	0.0094		8.345	8.1589	8.2924	9.2867	9.4707	8.9449
ENSMUSG00000022951	Rcan1	0.9686	0.0122		9.3178	9.6501	9.3317	10.789	10.0857	10.3307
ENSMUSG00000074513	Arfip1	0.9686	0.0132		7.9359	7.8954	8.0345	9.0882	8.554	9.1296
ENSMUSG00000054408	Spcs3	0.9679	0.0029		11.7936	11.5904	11.9721	12.7929	12.7227	12.744
ENSMUSG00000041992	Rapgef5	0.9677	0.1362		5.4135	5.5634	5.8304	7.3625	6.7238	5.6239
ENSMUSG00000118219	Gm29695	0.9669	0.1479		2.3266	2.9133	2.8396	4.5167	3.2167	3.2468
ENSMUSG00000087502	Gm16091	0.9664	0.0959		3.4743	3.6819	3.9858	4.0249	4.9793	5.0372
ENSMUSG00000102565	Gm37036	0.9661	0.1701		2.5928	3.7779	3.7522	3.749	4.2351	5.0372
ENSMUSG00000031478	Nek3	0.966	0.0408		6.5923	6.5963	6.4802	7.8848	7.7182	6.9639
ENSMUSG00000024664	Fads3	0.9656	0.0108		12.0468	12.273	12.3349	12.8047	13.1985	13.5482
ENSMUSG00000029790	Cep41	0.9655	0.0223		8.345	7.9937	8.4008	9.6763	8.9713	8.9885
ENSMUSG00000110586	4930578M07Rik	0.9653	0.0914		2.5928	3.3482	2.8396	3.749	4.314	3.6134
ENSMUSG00000025027	Xpnpep1	0.9652	0.0024		11.7142	11.81	11.6134	12.6044	12.8242	12.6046
ENSMUSG00000040430	Pitpnc1	0.9649	0.0313		7.0561	7.5458	7.9769	8.5624	8.6215	8.2898
ENSMUSG00000026790	Odf2	0.9648	0.0035		11.2162	10.9958	10.8934	11.8723	12.1663	11.9612
ENSMUSG00000002897	Il17ra	0.9641	0.0037		9.1576	9.027	9.2405	9.9773	10.1584	10.1818
ENSMUSG00000089827	1700023H06Rik	0.9629	0.2098		3.7167	3.2173	4.7064	5.7565	4.2351	4.5375
ENSMUSG00000110622	Iqcn	0.9629	0.113		3.183	3.0733	3.252	4.575	3.3724	4.4496
ENSMUSG00000055188	Rbm3os	0.9623	0.0718		3.336	3.579	3.6651	4.2564	4.2351	4.9755
ENSMUSG00000097587	4930578M01Rik	0.9623	0.1539		3.4743	3.868	4.5204	5.015	4.1515	5.5831
ENSMUSG00000031467	Agpat5	0.9622	0.0026		10.1292	10.2532	10.1867	11.3079	11.0234	11.1245
ENSMUSG00000034893	Cog3	0.962	0.0058		10.0608	10.1593	9.7625	11.0341	11.1117	10.7229
ENSMUSG00000021692	Dimt1	0.9619	0.0254		8.5069	8.4919	8.7989	9.0398	9.6846	9.9591
ENSMUSG00000024727	Trpm6	0.9617	0.1063		8.4743	8.7798	8.0258	9.6846	10.0121	8.4682
ENSMUSG00000029370	Rassf6	0.9617	0.0689		7.6811	7.79	7.0173	8.3698	9.0713	7.9325
ENSMUSG00000070520	Nsmce3	0.9616	0.0235		8.8497	9.0123	9.3701	9.862	9.7249	10.5301
ENSMUSG00000015143	Actn1	0.9612	0.004		12.3596	12.3141	12.5171	13.2638	13.5875	13.2231
ENSMUSG00000022369	Mtbp	0.9612	0.0048		9.8766	9.4478	9.8466	10.7404	10.6124	10.7017
ENSMUSG00000113303	4930423D22Rik	0.9611	0.1229		4.1054	3.0733	3.8344	5.2117	4.2351	4.4496
ENSMUSG00000105326	6030400A10Rik	0.9609	0.1519		3.8241	4.0328	2.48	4.575	4.3889	4.2558
ENSMUSG00000031578	Mak16	0.9606	0.0101		10.5041	10.3045	10.8601	11.2643	11.4818	11.8045
ENSMUSG00000051235	Gen1	0.9604	0.0066		9.1679	8.8805	9.3923	10.1718	9.9943	10.156
ENSMUSG00000073647	Gm10557	0.9603	0.0132		8.0174	7.5526	7.8786	8.9654	8.7829	8.5811
ENSMUSG00000038047	Haus6	0.9594	0.0062		10.3907	9.8662	10.2366	11.1651	11.2385	10.9681
ENSMUSG00000049800	Sertad2	0.9593	0.0057		10.7965	10.8618	10.3829	11.6689	11.774	11.4763
ENSMUSG00000022636	Alcam	0.959	0.1791		9.531	9.2589	7.9769	10.2984	10.3924	8.9529
ENSMUSG00000034088	Hdlbp	0.9587	0.0192		13.624	13.3408	12.9065	14.5565	14.2352	13.9556
ENSMUSG00000022292	Rrm2b	0.9579	0.0172		9.2327	9.5482	8.9585	10.3732	10.4228	9.817
ENSMUSG00000025757	Hspa4l	0.9578	0.0129		11.2261	10.818	10.9951	12.0964	12.272	11.5442
ENSMUSG00000103114	Gm32200	0.9578	0.2661		2.8174	2.9133	2.671	5.2117	3.0422	3.0214
ENSMUSG00000061607	Mdc1	0.9573	0.0231		11.3737	11.1039	10.9492	12.6503	11.9208	11.7277
ENSMUSG00000013629	Cad	0.9572	0.0075		11.5177	11.1926	11.8143	12.2976	12.539	12.5597
ENSMUSG00000038515	Grtp1	0.9568	0.0497		5.2303	5.265	5.0537	6.5792	6.1006	5.7396
ENSMUSG00000027412	Lpin3	0.9562	0.067		7.8303	8.0283	7.2446	9.2997	8.4874	8.1848
ENSMUSG00000038894	Irs2	0.9562	0.0229		10.8891	10.6686	10.6257	12.1933	11.6821	11.1767
ENSMUSG00000104960	Snhg8	0.9551	0.0558		8.8624	9.1193	9.8216	9.7744	10.1273	10.7668
ENSMUSG00000118107	Gm34455	0.9545	0.1049		3.0117	2.7334	2.9906	4.5167	3.641	3.4417
ENSMUSG00000020954	Strn3	0.9544	0.003		11.0961	11.0497	10.8159	12.0279	11.9949	11.8022
ENSMUSG00000030732	Chrdl2	0.9541	0.0801		4.3407	5.3298	4.3632	5.652	5.4678	5.7762
ENSMUSG00000045744	Bricd5	0.9541	0.2031		3.183	4.0328	3.4733	5.2834	4.8261	3.4417
ENSMUSG00000071181	3830408C21Rik	0.954	0.0883		4.8274	5.833	5.0537	6.314	6.5224	5.7396
ENSMUSG00000032497	Lrrfip2	0.9533	0.0053		10.3497	10.2353	9.9812	11.0132	11.3743	11.0386
ENSMUSG00000008393	Carhsp1	0.9532	0.0049		11.8335	11.5804	12.1021	12.7741	12.8707	12.7309
ENSMUSG00000018171	Vmp1	0.9531	0.01		11.7085	12.1854	11.9817	13.0042	12.5763	13.1544
ENSMUSG00000022094	Slc39a14	0.9529	0.022		11.5946	11.5135	11.3926	12.9631	12.4517	11.9447
ENSMUSG00000050854	Tmem125	0.9527	0.1317		5.065	5.089	3.7522	5.9003	5.3226	5.5412
ENSMUSG00000049516	Spty2d1	0.9526	0.0042		10.9265	11.007	10.5631	11.8344	11.8093	11.7106
ENSMUSG00000024803	Ankrd1	0.9519	0.012		12.4433	12.6689	12.9937	13.4929	13.4825	13.9864
ENSMUSG00000022052	Ppp2r2a	0.9518	0.4374		10.5894	10.3637	7.9859	11.6095	11.3268	8.8579
ENSMUSG00000029179	Zcchc4	0.9505	0.0141		9.4516	9.2796	9.9284	10.6677	10.2199	10.6235
ENSMUSG00000027613	Eif6	0.9504	0.0358		11.5899	11.7741	12.2626	12.3255	12.8111	13.3412
ENSMUSG00000022090	Pdlim2	0.9498	0.2349		5.1081	6.4289	5.5188	6.8746	7.5326	5.498
ENSMUSG00000030788	Rnf141	0.9494	0.0051		10.7563	10.4	10.8184	11.5994	11.7718	11.4517
ENSMUSG00000107455	Gm43868	0.9494	0.1754		4.0176	3.2173	5.019	5.1362	4.6546	5.3111
ENSMUSG00000078773	Rad54b	0.9486	0.0087		9.2592	9.0679	9.285	10.3967	10.2377	9.8236
ENSMUSG00000040195	Nemp1	0.9484	0.0055		10.3565	9.8275	10.145	11.058	10.9892	11.1271
ENSMUSG00000104925	Gm43061	0.9484	0.1485		4.6045	4.4375	5.019	4.685	5.9847	6.2365
ENSMUSG00000030287	Itpr2	0.9479	0.0297		11.3693	11.0818	10.8228	12.5354	12.0568	11.5255
ENSMUSG00000020715	Ern1	0.9478	0.0109		10.0415	10.0116	9.5915	11.0933	10.8726	10.5221
ENSMUSG00000117698	BC037704	0.9476	0.0926		5.3787	5.5084	5.0537	5.5393	6.7666	6.4779
ENSMUSG00000110303	Gm45328	0.9472	0.1011		3.7167	3.2173	4.1229	4.8358	4.1515	4.9112
ENSMUSG00000078995	Zfp456	0.9456	0.0714		5.722	6.5963	6.136	7.6128	6.9005	6.7778
ENSMUSG00000017831	Rab5a	0.9455	0.0084		10.9992	10.9136	10.5226	11.9449	11.848	11.479
ENSMUSG00000107877	Gm43951	0.9453	0.0608		5.9526	6.3685	6.6141	6.9426	7.0231	7.8054
ENSMUSG00000020523	Fam114a2	0.9451	0.0026		10.626	10.8313	10.8272	11.8179	11.7038	11.5982
ENSMUSG00000031709	Tbc1d9	0.9451	0.0227		10.1213	10.5063	11.0461	11.695	11.2555	11.5587
ENSMUSG00000108216	Gm44153	0.9449	0.1557		3.8241	3.4682	2.9906	3.6439	5.1178	4.3559
ENSMUSG00000093536	Smim17	0.9448	0.1441		3.0117	2.2879	2.8396	2.9594	3.7586	4.2558
ENSMUSG00000103703	Gm42568	0.9445	0.1081		3.4743	3.2173	3.8344	4.5167	3.8673	4.9755
ENSMUSG00000020812	Snhg16	0.9444	0.024		8.5777	9.075	9.0559	9.3999	9.9686	10.1732
ENSMUSG00000037259	Dzank1	0.9444	0.1663		4.9272	5.7876	3.9858	6.151	5.8848	5.498
ENSMUSG00000046449	Nexmif	0.944	0.1151		8.5584	7.2849	8.0899	9.6046	8.3951	8.7654
ENSMUSG00000041235	Chd7	0.9436	0.0222		6.4486	6.7102	6.7788	7.6404	7.789	7.339
ENSMUSG00000028655	Mfsd2a	0.9425	0.015		7.8622	7.4688	8.0773	8.6866	8.8205	8.7285
ENSMUSG00000070315	4930581F22Rik	0.9421	0.0871		5.8546	6.2892	6.7994	7.5341	6.6497	7.5858
ENSMUSG00000025337	Sbds	0.9419	0.0046		9.574	9.6148	9.2795	10.5159	10.4613	10.3168
ENSMUSG00000022280	Rnf19a	0.9417	0.0098		11.5523	11.7569	11.0547	12.4947	12.4087	12.2855
ENSMUSG00000020806	Rhbdf2	0.9416	0.0132		9.6213	9.8063	9.5646	10.936	10.694	10.1869
ENSMUSG00000024424	Ttc39c	0.9409	0.1018		5.8798	7.0646	7.1515	7.4431	8.0303	7.4451
ENSMUSG00000026924	Sec16a	0.9406	0.0022		11.9075	11.8643	11.6953	12.7768	12.7618	12.7503
ENSMUSG00000065418	Mir322	0.9402	0.0947		2.8174	3.2173	3.4733	3.6439	4.2351	4.4496
ENSMUSG00000020859	Spag9	0.9399	0.0061		11.8407	11.9548	11.668	12.9296	12.8905	12.463
ENSMUSG00000113984	Gm48890	0.9398	0.1253		3.183	2.7334	3.252	3.5306	3.7586	4.6988
ENSMUSG00000051378	Kif18b	0.9397	0.0047		10.8218	10.44	10.8832	11.6747	11.7229	11.5666
ENSMUSG00000022146	Osmr	0.9393	0.2496		4.7202	4.9308	6.0002	6.2257	5.0731	7.1705
ENSMUSG00000106680	Gm43852	0.9389	0.1034		4.5429	4.604	5.1531	5.015	6.0322	6.0696
ENSMUSG00000105607	Gm43513	0.9388	0.093		4.4786	4.6554	4.6164	4.8358	5.6913	6.0398
ENSMUSG00000040848	Sft2d2	0.9387	0.0055		11.6477	11.5222	11.1788	12.4982	12.4415	12.2252
ENSMUSG00000103632	Gm38329	0.9377	0.164		4.1054	3.2173	2.671	4.326	4.7141	3.7668
ENSMUSG00000031671	Setd6	0.9375	0.0641		8.5269	8.3701	8.8977	8.7826	9.8576	9.967
ENSMUSG00000033364	Usp37	0.9373	0.0116		10.6975	10.2311	10.7158	11.8126	11.2834	11.3605
ENSMUSG00000024436	Mrps18b	0.9372	0.0104		9.1265	9.1487	9.4937	10.0107	10.0587	10.5112
ENSMUSG00000041556	Fbxo2	0.9368	0.238		5.065	5.5901	4.7494	6.5934	6.8484	4.7731
ENSMUSG00000029161	Cgref1	0.9361	0.23		3.183	2.5278	3.7522	4.4559	3.0422	4.7731
ENSMUSG00000102780	Gm38253	0.9361	0.0332		5.9992	6.079	5.748	7.1866	6.6344	6.8135
ENSMUSG00000112096	A430103D13Rik	0.9361	0.1886		5.065	5.4219	4.4176	5.8539	6.8217	5.0372
ENSMUSG00000071103	1700029J07Rik	0.9354	0.067		5.8546	6.8929	6.6711	7.654	7.1031	7.4677
ENSMUSG00000078942	Naip6	0.935	0.1461		3.7167	3.6819	3.1272	4.7873	4.93	3.6134
ENSMUSG00000021203	Otub2	0.9349	0.0334		6.289	6.4436	6.388	7.7005	7.2609	6.9639
ENSMUSG00000053253	Ndfip2	0.9346	0.0053		9.574	9.6374	9.7023	10.8367	10.4839	10.3969
ENSMUSG00000010097	Nxf1	0.9344	0.0048		11.7508	11.8325	11.9271	12.497	12.9206	12.8959
ENSMUSG00000055865	Tafa3	0.9342	0.1689		3.336	4.1086	3.3669	5.318	3.7586	4.5375
[truncated: 12,674 more rows]

## Sheet: DESeq2
Row-names	Symbol	Treatment-Control___log2FoldChange	Treatment-Control___padj	data	N1	N2	N3	H1	H2	H3
ENSMUSG00000023045	Soat2	9.5317	0		2.3266	2.5278	2.2599	9.878	9.5585	9.8835
ENSMUSG00000022262	Dnah5	8.3213	0		2.3266	2.5278	2.2599	9.1779	8.5043	7.6758
ENSMUSG00000029727	Cyp3a13	7.8502	0		2.3266	2.9133	2.2599	8.0888	9.3704	8.2642
ENSMUSG00000029134	Plb1	7.8393	0		2.3266	2.7334	2.2599	8.8342	8.6823	7.3267
ENSMUSG00000025347	Mettl7b	7.5642	0		4.4786	4.6554	5.8892	12.888	12.0183	12.6407
ENSMUSG00000013483	Card14	7.5444	0		2.8174	3.2173	2.671	9.9417	9.7249	7.4565
ENSMUSG00000024912	Fosl1	7.3946	0		4.3407	3.868	5.6606	12.0393	12.2471	11.7457
ENSMUSG00000030790	Adm	7.3765	0		2.5928	5.3612	2.9906	11.6664	11.3245	10.413
ENSMUSG00000029334	Prkg2	7.3727	0		4.0176	3.868	5.3614	12.3942	11.3334	11.0234
ENSMUSG00000029378	Areg	7.2009	0		3.183	2.9133	2.48	9.6306	9.0798	7.1427
ENSMUSG00000109372	Gm19410	7.0975	0		2.3266	2.2879	2.2599	7.5044	5.7206	7.1567
ENSMUSG00000039238	Zfp750	7.086	0.0003		2.3266	2.2879	2.2599	8.4224	4.5279	3.2468
ENSMUSG00000030187	Klra2	7.0076	0		2.5928	2.2879	2.671	8.3195	8.2818	5.9783
ENSMUSG00000114554	5430425K12Rik	6.9027	0		2.8174	2.7334	2.2599	8.8783	7.6361	6.5849
ENSMUSG00000009687	Fxyd5	6.8858	0		3.183	2.5278	3.9858	9.3339	10.1039	9.0383
ENSMUSG00000104554	Gm4610	6.8694	0		4.3407	4.6554	3.252	10.9554	11.1785	9.4402
ENSMUSG00000036480	Prss56	6.8426			2.3266	2.2879	2.671	8.729	5.5679	5.3111
ENSMUSG00000116657	Gm49774	6.7433	0		2.5928	4.3148	3.6651	10.3209	10.0313	9.1817
ENSMUSG00000024388	Myo7b	6.6567	0		2.3266	3.9527	3.1272	9.8487	9.4707	7.0107
ENSMUSG00000005611	Irag1	6.6086	0		2.8174	3.0733	2.671	8.9897	7.8499	7.823
ENSMUSG00000074489	Bglap3	6.5727	0		2.5928	2.5278	2.671	7.6197	8.2867	6.5217
ENSMUSG00000021950	Anxa8	6.558	0		3.183	3.868	3.252	10.2555	9.3448	7.1286
ENSMUSG00000055333	Fat2	6.352	0		3.7167	5.8552	5.2758	11.6016	11.9696	9.8301
ENSMUSG00000028125	Abca4	6.3334	0		4.0176	5.2978	4.5692	11.0263	11.1752	10.0535
ENSMUSG00000042759	Apobr	6.2425	0		2.5928	2.2879	2.671	7.7646	5.7774	7.1427
ENSMUSG00000085912	Trp53cor1	6.1502	0		3.0117	3.3482	2.8396	9.3083	7.6815	6.9154
ENSMUSG00000039518	Cdsn	6.0357	0		3.183	3.2173	2.8396	8.9654	7.6206	7.5961
ENSMUSG00000029468	P2rx7	6.0155	0		3.0117	2.5278	2.48	7.7583	7.329	6.6054
ENSMUSG00000053141	Ptprt	5.898	0		3.8241	3.3482	2.2599	9.2713	7.8096	7.3512
ENSMUSG00000020256	Aldh1l2	5.8346	0		8.5739	8.6557	7.5604	14.3635	14.0964	13.985
ENSMUSG00000031844	Hsd17b2	5.6765	0		2.3266	2.9133	2.2599	6.8032	7.0348	5.3601
ENSMUSG00000085183	Wincr1	5.6726	0		4.4786	4.972	5.4682	11.155	10.0062	10.1262
ENSMUSG00000026981	Il1rn	5.6457	0		3.183	4.3148	4.3632	9.9376	8.9027	8.8451
ENSMUSG00000063767	S100a7a	5.6136	0		2.8174	4.4951	3.1272	9.2333	8.844	7.9406
ENSMUSG00000108179	Gm44274	5.5453	0		2.3266	2.9133	2.8396	7.5193	6.9508	6.183
ENSMUSG00000004540	Psg17	5.51	0		2.5928	2.7334	2.2599	6.6889	6.6033	5.7762
ENSMUSG00000024421	Lama3	5.4367	0		4.8782	6.3529	4.056	11.2324	10.7607	9.7837
ENSMUSG00000059434	Gckr	5.4339	0		2.3266	2.2879	2.48	6.5358	5.6913	4.2558
ENSMUSG00000027824	Vmn2r1	5.4338	0		2.5928	3.3482	2.2599	7.5044	7.465	5.3111
ENSMUSG00000086681	Gm16178	5.3595	0		2.8174	2.2879	2.671	6.9646	6.1445	6.1555
ENSMUSG00000037613	Tnfrsf23	5.3591	0		7.078	6.7463	6.6024	12.3516	12.497	11.2485
ENSMUSG00000040828	Catsperd	5.3572	0		2.3266	3.2173	2.48	7.8732	5.2032	6.0398
ENSMUSG00000021831	Ero1a	5.3262	0		10.3918	10.9267	9.9412	16.1336	15.9405	15.1422
ENSMUSG00000074796	Slc4a11	5.3227	0		7.3627	7.7726	8.1311	13.5332	13.1958	12.2514
ENSMUSG00000107458	Gm44040	5.3206	0		3.183	2.5278	3.252	8.1572	6.8616	6.7037
ENSMUSG00000005413	Hmox1	5.3181	0		8.8305	8.7445	8.859	14.4342	13.8388	14.0137
ENSMUSG00000116289	Gm31342	5.2982	0		2.8174	2.2879	2.48	6.7535	5.5353	6.0988
ENSMUSG00000096965	3300005D01Rik	5.2737	0		3.183	2.2879	2.8396	6.6488	7.605	5.9783
ENSMUSG00000054568	Usp17la	5.2635	0		2.5928	2.2879	2.2599	5.097	6.5715	4.3559
ENSMUSG00000038550	Ciart	5.2536	0		5.3064	6.1704	5.9458	10.8012	10.7483	11.3903
ENSMUSG00000038742	Angptl6	5.2401	0		4.8782	5.0121	4.947	10.1777	9.7176	10.0479
ENSMUSG00000035273	Hpse	5.2298	0		4.7748	5.6163	3.6651	9.9152	10.3403	9.3058
ENSMUSG00000029380	Cxcl1	5.1985	0		4.4786	5.089	5.9458	11.0158	10.3249	9.1576
ENSMUSG00000043388	Tmem130	5.1862	0		2.3266	2.7334	3.3669	6.4292	6.4717	7.7513
ENSMUSG00000084807	Gm13073	5.182	0		2.5928	2.2879	3.1272	7.0286	6.0086	6.6846
ENSMUSG00000005045	Chd5	5.151	0		6.4317	6.7815	6.6711	12.4479	11.9874	9.0644
ENSMUSG00000058966	Tlcd3b	5.1199	0		2.5928	2.2879	2.48	6.8153	5.4678	3.2468
ENSMUSG00000037411	Serpine1	5.0898	0		9.3132	9.5051	11.4881	15.5295	15.6797	15.4279
ENSMUSG00000037106	Fer1l6	5.0887	0.0001		3.183	4.4951	3.3669	9.2036	8.6673	5.153
ENSMUSG00000037716	Ccdc33	5.0769	0		2.3266	2.2879	3.1272	6.331	6.9753	5.2603
ENSMUSG00000025408	Ddit3	5.0709	0		7.4151	7.5662	7.6539	12.7877	12.3171	12.6276
ENSMUSG00000092216	Gm19345	5.0457	0		2.3266	3.0733	2.2599	6.8861	6.1227	4.8438
ENSMUSG00000017204	Gsdma	5.0312	0		3.336	3.4682	2.671	8.0169	7.8232	4.8438
ENSMUSG00000107768	Gm44275	5.0244	0		5.2303	5.265	5.1207	10.6752	9.9913	9.1541
ENSMUSG00000025383	Il23a	4.9784	0		2.5928	2.9133	2.671	5.806	6.4544	6.9154
ENSMUSG00000115406	Gm49300	4.9724	0.0005		2.3266	2.2879	2.2599	6.1317	3.9684	3.2468
ENSMUSG00000026271	Gpr35	4.9308	0		3.183	3.2173	2.8396	8.1619	5.9847	6.1555
ENSMUSG00000023120	Ldc1	4.9189	0		3.183	2.5278	2.8396	7.1773	6.9133	5.4535
ENSMUSG00000027737	Slc7a11	4.8855	0		8.1829	6.3529	7.9262	13.3464	11.0618	12.3703
ENSMUSG00000117571	4933433H22Rik	4.8834	0		2.3266	2.5278	2.8396	6.6351	5.5679	5.498
ENSMUSG00000026959	Grin1	4.882	0		3.4743	3.3482	3.9858	8.7918	7.3849	7.2112
ENSMUSG00000070498	Tmem132b	4.8702	0		2.5928	3.4682	2.2599	7.9413	5.2839	3.9054
ENSMUSG00000032548	Slco2a1	4.8451	0		4.4786	5.6673	3.9121	9.9988	9.714	8.3877
ENSMUSG00000022705	Drd3	4.815	0		2.5928	2.2879	3.1272	6.314	6.5874	5.8468
ENSMUSG00000074577	Ripor3	4.815	0		5.1907	5.877	5.5188	10.792	10.4828	8.8013
ENSMUSG00000047528	Flacc1	4.8103	0		3.336	3.0733	3.7522	7.5267	7.9522	7.1977
ENSMUSG00000026166	Ccl20	4.8041	0		3.0117	3.0733	4.5692	7.5704	8.4442	8.1363
ENSMUSG00000050914	Ankrd37	4.7886	0		5.343	7.9376	5.5434	11.9425	11.3846	11.1412
ENSMUSG00000026628	Atf3	4.7792	0		7.4823	7.6383	8.0773	13.5549	10.7233	11.8763
ENSMUSG00000047428	Dlk2	4.7696	0		2.5928	2.2879	2.2599	5.8302	5.2839	3.7668
ENSMUSG00000022218	Tgm1	4.7695	0		3.183	4.5506	2.9906	8.263	8.6176	6.4555
ENSMUSG00000086845	Gm13010	4.757	0		2.8174	4.0328	3.1272	8.1086	7.4736	6.7226
ENSMUSG00000004655	Aqp1	4.7451	0		3.7167	3.6819	3.6651	8.328	8.4486	5.7762
ENSMUSG00000115852	Gm52969	4.7235	0		3.183	3.0733	2.8396	7.4509	5.7493	6.831
ENSMUSG00000032715	Trib3	4.7179	0		8.0998	6.6094	7.9074	12.5468	11.945	12.5191
ENSMUSG00000046056	Sbsn	4.6815	0		4.0176	4.8447	4.056	9.1446	9.1433	7.2507
ENSMUSG00000034855	Cxcl10	4.68			4.6045	4.5506	6.1197	11.2737	6.9005	6.8822
ENSMUSG00000015766	Eps8	4.6707	0		3.6006	3.868	3.9858	8.9434	7.7959	6.2881
ENSMUSG00000052955	Cpvl	4.6656	0		3.183	3.3482	3.252	7.7457	7.5076	5.3601
ENSMUSG00000032057	Hoatz	4.6577	0		2.5928	2.5278	2.48	6.6074	5.0731	3.9054
ENSMUSG00000020399	Havcr2	4.6443	0		3.0117	2.7334	2.48	6.6213	6.3645	5.0372
ENSMUSG00000047963	Stbd1	4.6336	0		6.5459	6.5426	6.0526	10.73	11.013	11.112
ENSMUSG00000031538	Plat	4.631	0		7.7509	8.3468	8.9072	12.1396	13.8013	12.6078
ENSMUSG00000031026	Trim66	4.615	0		2.5928	2.2879	2.48	5.7565	4.8261	5.2603
ENSMUSG00000033730	Egr3	4.6021	0.0001		2.3266	2.2879	2.671	6.331	4.5279	3.7668
ENSMUSG00000063522	Ly6m	4.5891	0		2.5928	2.5278	2.671	5.652	6.1445	5.3111
ENSMUSG00000097098	9330111N05Rik	4.5655	0		2.8174	3.579	2.8396	7.9302	5.6309	5.7396
ENSMUSG00000047104	Pbp2	4.5634	0		4.1881	4.2493	4.5692	9.3776	8.3205	7.5546
ENSMUSG00000003279	Dlgap1	4.5572	0		2.3266	2.9133	2.8396	6.8393	5.8321	4.6204
ENSMUSG00000026639	Lamb3	4.5444	0		7.4407	7.9272	7.2521	12.4826	12.1384	11.4446
ENSMUSG00000020892	Aloxe3	4.5404	0		3.183	2.5278	2.671	7.4817	4.7141	4.1482
ENSMUSG00000034799	Unc13a	4.5404	0		6.3076	7.2767	5.6149	11.5804	10.8904	10.4086
ENSMUSG00000087028	Gm13387	4.5375	0		5.1081	4.4951	4.3068	9.2082	9.3956	7.9079
ENSMUSG00000022483	Col2a1	4.4854	0.0003		2.3266	2.2879	2.48	5.8773	3.641	4.2558
ENSMUSG00000024521	Pmaip1	4.4746	0		9.173	8.6237	9.7347	14.4512	13.0802	13.1734
ENSMUSG00000027456	Sdcbp2	4.4671	0		3.336	3.579	3.1272	6.4911	6.9133	7.7604
ENSMUSG00000021125	Arg2	4.4661	0		2.3266	2.7334	2.9906	5.9003	6.3077	5.5412
ENSMUSG00000003545	Fosb	4.466	0		4.2664	4.8884	4.1229	9.1203	8.8001	7.695
ENSMUSG00000020044	Timp3	4.4611	0		3.183	3.579	2.9906	7.0494	6.5874	7.2892
ENSMUSG00000039742	Fam71f1	4.4573	0		5.8798	6.2892	7.1515	10.9899	10.4806	11.2542
ENSMUSG00000086526	Gm12762	4.393	0		3.7167	4.2493	3.9858	8.8783	7.3385	7.1
ENSMUSG00000045349	Sh2d5	4.3831	0		3.8241	4.7997	4.3068	8.2894	9.1964	7.2765
ENSMUSG00000054855	Rnd1	4.3397	0		6.5301	6.0408	7.3461	11.2759	11.2448	10.4231
ENSMUSG00000003541	Ier3	4.3331	0		9.4724	10.4455	10.3888	15.0433	14.2283	13.99
ENSMUSG00000067219	Nipal1	4.3322	0		3.336	2.9133	3.5724	7.3375	6.9005	6.4096
ENSMUSG00000038295	Atg9b	4.3231	0		4.8274	6.7344	5.9641	11.0413	9.9973	9.222
ENSMUSG00000026674	Ddr2	4.3206	0		3.183	2.9133	2.9906	7.1196	5.6913	6.1274
ENSMUSG00000111343	Gm47175	4.3133	0		3.4743	3.868	3.3669	7.379	7.7821	6.6652
ENSMUSG00000038917	3930402G23Rik	4.3101	0		2.3266	2.7334	2.48	5.417	5.5019	4.8438
ENSMUSG00000040405	Havcr1	4.2973	0		2.8174	3.0733	2.9906	5.9229	6.1006	6.7778
ENSMUSG00000010051	Hyal1	4.2794	0		5.576	6.1704	5.2758	10.761	9.3888	8.8058
ENSMUSG00000026068	Il18rap	4.2533	0		2.5928	3.4682	4.3068	7.0182	6.6798	8.0567
ENSMUSG00000055994	Nod2	4.2351	0		2.3266	3.0733	2.2599	5.248	6.0782	4.5375
ENSMUSG00000048078	Tenm4	4.2298	0		4.8782	5.3918	5.3334	10.1635	8.719	8.3086
ENSMUSG00000006143	Upk3bl	4.22	0		3.336	4.8447	3.9121	8.2451	8.598	6.7037
ENSMUSG00000056271	Lman1l	4.2083	0		2.3266	2.9133	2.48	5.5097	5.8321	4.5375
ENSMUSG00000080152	H3f4	4.191	0.0002		3.0117	2.7334	2.9906	3.4076	5.0731	7.3512
ENSMUSG00000006411	Nectin4	4.17	0.0001		2.3266	3.7779	2.8396	7.6674	4.8261	4.9755
ENSMUSG00000050359	Sprr1a	4.1658	0		5.5132	6.399	7.1595	10.9192	9.6469	10.9462
ENSMUSG00000043421	Hilpda	4.1656	0		7.5227	7.6699	8.3975	12.3453	11.8897	11.9003
ENSMUSG00000020911	Krt19	4.1443	0		8.5739	10.2667	7.731	13.2893	13.7554	13.0082
ENSMUSG00000027611	Procr	4.1142	0.0001		2.3266	2.2879	2.671	4.326	4.7712	5.3601
ENSMUSG00000026536	Ifi211	4.0831	0		2.3266	2.7334	3.3669	6.0101	5.4678	6.3133
ENSMUSG00000116380	Gm39556	4.0694	0		3.336	4.2493	4.1229	7.5775	7.674	7.6854
ENSMUSG00000097282	5031415H12Rik	4.069	0		3.7167	2.7334	3.9121	6.9646	7.1894	6.9796
ENSMUSG00000105826	Gm42141	4.0684	0		2.3266	2.5278	2.9906	5.318	5.805	5.0372
ENSMUSG00000027071	P2rx3	4.0552	0		2.8174	2.2879	3.5724	7.0899	5.6913	4.5375
ENSMUSG00000059668	Krt4	4.0378	0		4.1054	4.2493	3.5724	8.8783	6.6946	4.8438
ENSMUSG00000035697	Arhgap45	4.0318	0		4.6045	5.0121	5.3614	9.7222	8.7513	7.1427
ENSMUSG00000096035	Odaph	4.0309	0		3.4743	3.7779	4.6164	6.3809	6.7944	8.7654
ENSMUSG00000041120	Nbl1	4.0301	0		4.3407	5.3918	4.6164	9.7556	7.8164	7.1705
ENSMUSG00000078606	Gvin2	4.0267	0		2.8174	2.5278	4.7912	5.9672	6.8351	8.2642
ENSMUSG00000051435	Fhad1	4.0137	0		4.1054	5.162	3.3669	8.511	8.2369	7.4222
ENSMUSG00000024486	Hbegf	4.0124	0		9.2592	9.1864	9.7962	13.3261	13.7545	13.1953
ENSMUSG00000087341	0610040F04Rik	4.0109	0		2.5928	2.5278	2.48	5.015	5.397	4.5375
ENSMUSG00000102893	Gm37855	4.0109	0		2.5928	2.9133	3.3669	7.1294	4.0629	5.6239
ENSMUSG00000032589	Bsn	4.0097	0		2.8174	3.9527	3.1272	7.7136	6.0553	5.5412
ENSMUSG00000066952	Myo1h	4.0067	0		2.5928	2.5278	2.48	5.318	4.9793	4.6988
ENSMUSG00000057098	Ebf1	3.9937	0		4.3407	4.5506	4.2481	8.4499	8.1958	7.4451
ENSMUSG00000006567	Atp7b	3.9932	0		4.6045	5.7876	4.056	9.1228	8.4573	8.788
ENSMUSG00000053581	Zfand2a	3.9907	0		9.4474	9.2939	9.6719	14.2969	12.9214	12.5459
ENSMUSG00000035775	Krt20	3.9711	0.0162		6.7229	5.7407	3.252	10.5554	9.8192	5.8468
ENSMUSG00000028943	Espn	3.9695	0		3.183	5.1259	2.9906	7.474	8.4917	6.6455
ENSMUSG00000057836	Xlr3a	3.9641	0.0006		2.5928	2.5278	2.48	5.1362	5.6913	3.0214
ENSMUSG00000037580	Gch1	3.9296	0		4.2664	4.1806	4.4176	7.9133	8.1427	7.6563
ENSMUSG00000094018	S100a2	3.9248	0.0005		2.3266	2.2879	2.48	4.6311	4.5926	4.0319
ENSMUSG00000040435	Ppp1r15a	3.9134	0		9.6026	9.6954	9.6105	13.8884	13.0207	13.5912
ENSMUSG00000032487	Ptgs2	3.8943	0		6.6518	6.4726	7.052	11.3664	10.0997	9.7926
ENSMUSG00000118257	9630014M24Rik	3.8889	0		2.8174	3.4682	3.4733	6.1317	6.8484	6.4327
ENSMUSG00000111341	Gm47111	3.8868	0		3.4743	4.7997	4.056	7.9469	7.789	7.5961
ENSMUSG00000097636	Mirt1	3.884	0		4.6045	4.3774	5.8304	8.0169	9.3211	8.819
ENSMUSG00000018906	P4ha2	3.8769	0.0008		5.9526	9.6196	7.1595	12.0722	12.2618	12.3408
ENSMUSG00000005089	Slc1a2	3.8718	0.0001		2.5928	2.5278	3.3669	6.728	4.3889	5.153
ENSMUSG00000051335	Gfod1	3.8657	0		5.7495	6.1525	6.0526	9.8473	10.3684	8.5863
ENSMUSG00000113159	Gm48771	3.8581	0		2.5928	3.2173	2.2599	5.417	5.5679	5.2603
ENSMUSG00000031027	Stk33	3.8575	0		2.3266	3.0733	3.3669	5.9888	5.5019	6.3133
ENSMUSG00000101549	Gm29630	3.8534	0		4.5429	4.0328	5.4937	8.0987	7.4211	9.2869
ENSMUSG00000008461	Fut1	3.8439	0		2.8174	2.9133	4.2481	7.1294	6.6344	6.4999
ENSMUSG00000001227	Sema6b	3.8358	0		4.1054	5.3918	3.4733	8.4104	8.6673	6.5849
ENSMUSG00000110537	Gm4316	3.8179	0.0004		2.5928	2.2879	2.48	5.1362	4.5926	3.9054
ENSMUSG00000027015	Cybrd1	3.8053	0		3.0117	2.9133	2.2599	5.806	5.0269	5.2077
ENSMUSG00000026872	Zeb2	3.7928	0		3.4743	4.7997	4.4699	7.879	8.0763	7.6063
ENSMUSG00000029410	Ppef2	3.7897	0		2.3266	2.7334	2.9906	5.8302	4.9793	4.9755
ENSMUSG00000079033	Mef2b	3.7856	0		2.3266	3.0733	2.671	5.6246	5.6614	4.3559
ENSMUSG00000089849	Runx2os2	3.7824	0.0071		2.3266	2.2879	2.2599	4.6311	3.5129	3.6134
ENSMUSG00000027435	Cd93	3.7822	0		4.0176	5.265	4.3068	8.3616	8.2165	7.9486
ENSMUSG00000037447	Arid5a	3.7794	0		4.8782	4.9308	5.4937	8.643	8.1154	9.2741
ENSMUSG00000018774	Cd68	3.7774	0		5.722	6.501	6.3466	10.4227	9.9471	9.1645
ENSMUSG00000024846	Cst6	3.7723	0		2.8174	2.7334	3.4733	6.1317	6.1227	5.6635
ENSMUSG00000117485	Gm19696	3.7672	0		3.9241	4.1086	3.4733	7.8379	7.0464	6.2625
ENSMUSG00000028970	Abcb1b	3.747	0		3.336	3.3482	3.9121	7.4509	6.3458	6.1555
ENSMUSG00000013846	St3gal1	3.7385	0		7.3082	7.619	6.8595	11.7624	11.0517	9.0792
ENSMUSG00000032776	Mctp2	3.7344	0.0008		2.3266	3.3482	2.2599	4.3924	6.2883	4.2558
ENSMUSG00000078566	Bnip3	3.7304	0		10.2866	11.6287	10.0266	14.6278	14.4046	14.6268
ENSMUSG00000028341	Nr4a3	3.7267	0.0452		3.183	4.0328	2.2599	7.7329	4.93	3.2468
ENSMUSG00000003955	Fam162a	3.717	0		9.2853	10.3432	9.7625	13.6684	13.5091	13.5379
ENSMUSG00000024210	Ip6k3	3.709	0		2.3266	3.7779	2.8396	6.17	6.4717	5.0963
ENSMUSG00000025515	Muc2	3.7045	0		3.336	3.0733	2.48	6.5934	5.6913	4.1482
ENSMUSG00000026069	Il1rl1	3.6994			3.9241	5.3298	8.5017	11.2072	8.8736	11.2607
ENSMUSG00000037868	Egr2	3.6966	0		3.7167	3.7779	2.671	7.5988	5.4329	5.5412
ENSMUSG00000102475	Gm37246	3.6961	0.0104		2.3266	2.2879	2.48	2.558	4.46	4.9112
ENSMUSG00000085105	Gm12758	3.6955	0		3.8241	5.1259	3.8344	8.4144	7.7109	6.9796
ENSMUSG00000040829	Zmynd15	3.6844	0		3.183	3.2173	3.1272	7.1098	4.7141	5.3601
ENSMUSG00000015533	Itga2	3.6741	0		6.4818	6.1163	5.8503	9.5655	10.2453	9.3244
ENSMUSG00000026414	Tnnt2	3.6713	0		3.9241	4.3774	4.947	7.196	7.7109	8.5014
ENSMUSG00000025064	Col17a1	3.6563	0.0083		2.5928	2.5278	2.2599	5.2834	4.5926	2.4258
ENSMUSG00000090066	1110002E22Rik	3.6521	0		4.9746	5.6673	7.052	10.5991	8.4659	9.379
ENSMUSG00000042622	Maff	3.6454	0		8.4948	9.0147	9.2139	12.8236	12.5993	12.2392
ENSMUSG00000038729	Pakap	3.6244	0		3.8241	4.0328	4.2481	7.2685	7.3849	7.3018
ENSMUSG00000037033	Clca3b	3.5961	0		2.8174	3.2173	3.5724	6.2793	6.3829	5.6635
ENSMUSG00000070313	Pate14	3.5945	0		2.8174	2.7334	2.9906	5.6788	5.2032	5.3601
ENSMUSG00000021765	Fst	3.5883	0		3.4743	3.2173	5.5676	8.5803	7.2205	7.3018
ENSMUSG00000052837	Junb	3.5799	0		9.0456	9.658	10.831	13.614	13.6193	13.6121
ENSMUSG00000107198	Gm19619	3.5756	0.0041		2.3266	2.9133	2.2599	5.3848	4.6546	3.0214
ENSMUSG00000001281	Itgb7	3.5624	0.0013		2.5928	2.2879	2.48	4.8358	4.46	3.7668
ENSMUSG00000019960	Dusp6	3.5529	0		10.4145	10.4582	10.1471	13.7986	13.9486	13.9328
ENSMUSG00000090576	Gm17055	3.5466	0.0001		2.5928	2.9133	2.2599	4.8827	4.5279	5.0372
ENSMUSG00000116617	Gm49767	3.5437	0.0004		2.3266	2.7334	2.48	4.2564	4.3889	5.0963
ENSMUSG00000085976	Gm13816	3.5435	0.0002		2.3266	2.2879	2.9906	4.9282	4.7141	4.6988
ENSMUSG00000030717	Nupr1	3.5425	0		4.8782	5.3612	5.4682	8.2451	8.9027	8.7654
ENSMUSG00000039126	Prune2	3.5194	0		4.5429	5.051	5.1207	8.798	8.5211	6.7778
ENSMUSG00000043811	Rtn4r	3.5145	0		3.0117	2.9133	3.3669	6.5211	5.6309	4.9112
ENSMUSG00000045868	Gvin1	3.5116	0		3.0117	3.4682	4.9096	6.151	6.8484	8.0037
ENSMUSG00000057321	Usp17ld	3.5094	0.0019		2.8174	2.2879	2.2599	4.2564	4.879	3.9054
ENSMUSG00000058420	Syt17	3.5032	0		2.3266	3.868	3.9858	5.652	6.7805	6.9479
ENSMUSG00000034765	Dusp5	3.4979	0		7.9359	8.0621	8.2924	10.872	12.0478	11.5982
ENSMUSG00000040380	Cbln3	3.4929	0		3.336	4.5506	2.671	7.0076	6.7944	6.4096
ENSMUSG00000004558	Ndrg2	3.4913	0.0001		2.3266	3.0733	3.7522	5.8539	4.46	6.7037
ENSMUSG00000022707	Gbe1	3.4849	0		9.1447	8.6173	8.9167	12.4768	12.3476	12.3165
ENSMUSG00000080115	Eef1akmt3	3.4714	0		2.5928	3.0733	3.252	4.8358	5.7493	6.0398
ENSMUSG00000037428	Vgf	3.4696	0.0003		2.3266	2.7334	2.671	5.1745	4.5279	4.3559
ENSMUSG00000061397	Krt79	3.4559	0.0006		3.4743	2.7334	2.671	6.5061	5.2839	3.6134
ENSMUSG00000020889	Nr1d1	3.4545	0.0142		7.6302	8.0086	6.0526	11.923	10.626	7.1144
ENSMUSG00000036499	Eea1	3.4481	0		10.9385	10.5478	10.4921	15.0022	13.5021	13.1247
ENSMUSG00000068874	Selenbp1	3.4431	0		8.5506	9.326	7.6874	12.2077	12.5387	11.2863
ENSMUSG00000027977	Ndst3	3.4414	0		4.7202	4.0328	4.9835	8.3365	7.6284	7.3989
ENSMUSG00000016552	Foxred2	3.438	0.0054		2.5928	3.7779	2.48	6.8746	4.93	3.0214
ENSMUSG00000029120	Ppp2r2c	3.4378	0.0028		2.5928	3.0733	2.48	5.9229	4.879	3.0214
ENSMUSG00000064080	Fbln2	3.436	0.0066		4.0176	5.2315	7.6929	9.3148	9.714	10.2646
ENSMUSG00000067203	H2-K2	3.4275	0		3.336	3.4682	4.3068	7.4273	6.1006	6.4327
ENSMUSG00000097134	1110002J07Rik	3.4168	0.001		2.3266	2.7334	2.671	5.3848	4.2351	4.0319
ENSMUSG00000097363	Gm26717	3.4137	0.0001		3.336	3.3482	3.1272	7.0494	5.2839	4.3559
ENSMUSG00000110697	Gm31718	3.4125	0		3.183	3.2173	4.4699	7.7393	6.0553	5.2603
ENSMUSG00000035105	Egln3	3.4098	0		9.7881	11.1529	8.3941	14.0531	13.6158	12.8729
ENSMUSG00000001021	S100a3	3.4047	0		3.7167	4.2493	5.019	7.0698	7.3572	8.1222
ENSMUSG00000022769	Sdf2l1	3.4047	0		8.2615	8.3777	9.0387	12.4951	11.6042	11.7089
ENSMUSG00000102419	Gm36940	3.3976	0		3.9241	4.4951	3.5724	6.331	7.6889	6.9154
ENSMUSG00000004105	Angptl2	3.3938	0		5.6064	5.8552	6.3325	9.3817	9.8158	8.1711
ENSMUSG00000034394	Lif	3.3843	0		8.5854	8.69	9.1491	12.8662	11.5088	11.8768
ENSMUSG00000112636	Gm47223	3.3781	0		3.0117	2.9133	2.48	5.097	5.5353	4.6204
ENSMUSG00000040511	Pvr	3.3701	0		9.7167	9.8289	10.0212	13.5951	13.227	12.7262
ENSMUSG00000095457	Gvin-ps5	3.3623	0.0001		2.5928	2.5278	4.2481	6.1121	5.3603	6.6455
ENSMUSG00000050395	Tnfsf15	3.3582	0		2.5928	3.4682	3.7522	6.5061	6.1006	5.5412
ENSMUSG00000057069	Ero1b	3.3505	0		7.8559	8.1136	7.6253	11.7644	10.9725	10.6434
ENSMUSG00000046169	Adamts6	3.3478	0.0002		3.183	3.579	5.2461	5.8302	6.4011	8.4682
ENSMUSG00000048388	Fam171b	3.3417	0		3.9241	3.579	3.6651	7.0596	6.4368	6.1555
ENSMUSG00000027994	Mcub	3.3376	0		3.4743	4.6554	3.7522	6.8032	7.2905	6.9952
ENSMUSG00000017724	Etv4	3.3367	0		8.3314	6.5831	7.8444	10.8778	11.1665	11.136
ENSMUSG00000026480	Ncf2	3.3336	0.0001		2.5928	2.7334	2.9906	4.2564	5.0269	5.6239
ENSMUSG00000048572	Tmem252	3.3333	0.0084		3.0117	2.5278	2.2599	4.7371	5.4329	2.7541
ENSMUSG00000003032	Klf4	3.3316	0		8.4068	9.075	8.0345	12.5003	11.5919	11.2839
ENSMUSG00000030103	Bhlhe40	3.3239	0		10.8153	11.0509	10.836	14.6574	14.0502	13.8413
ENSMUSG00000028217	Cdh17	3.3212	0.0002		2.5928	3.579	2.671	5.731	6.0086	4.1482
ENSMUSG00000024395	Lims2	3.3081	0		3.7167	3.579	3.7522	7.4352	5.805	5.498
ENSMUSG00000030000	Add2	3.3074	0.0025		3.183	2.2879	2.671	5.731	4.8261	3.4417
ENSMUSG00000114493	Gm47071	3.2814	0.0007		2.3266	3.0733	2.671	5.417	4.93	3.9054
ENSMUSG00000006462	A530013C23Rik	3.2786	0		2.8174	4.2493	3.7522	6.997	6.5874	5.8468
ENSMUSG00000021751	Acox2	3.2734	0		6.9174	6.1345	7.6021	10.8005	9.6957	9.9847
ENSMUSG00000028758	Kif17	3.2657	0.002		3.4743	4.1806	2.671	6.6488	6.9994	3.2468
ENSMUSG00000032238	Rora	3.262	0		5.2303	6.5831	5.5188	9.4318	9.116	8.5391
ENSMUSG00000052302	Tbc1d30	3.2498	0		2.8174	3.2173	2.8396	5.248	5.3226	5.4535
ENSMUSG00000108804	Gm30437	3.2485	0.0017		2.8174	2.2879	2.671	4.1063	4.1515	5.2077
ENSMUSG00000019997	Ccn2	3.2447	0		10.0921	9.7659	10.7975	13.1758	12.8705	14.1855
ENSMUSG00000110266	Gm32742	3.2354	0.0018		2.5928	2.5278	2.671	5.1362	4.3889	3.7668
ENSMUSG00000082247	Gm16074	3.2338	0		2.5928	3.9527	2.8396	5.0566	6.1227	6.0696
ENSMUSG00000055632	Hmcn2	3.2324	0		5.4135	5.8552	6.136	10.0601	7.9584	7.5651
ENSMUSG00000038412	Higd1a	3.2301	0		10.0745	10.5964	10.6163	13.6159	13.5941	13.8103
ENSMUSG00000084989	Crocc2	3.2268	0		4.1054	4.7997	5.1848	8.8696	7.1789	5.6635
ENSMUSG00000032942	Ucp3	3.2221	0.0001		3.9241	3.868	3.7522	7.6674	6.187	4.6988
ENSMUSG00000039236	Isg20	3.2188	0		5.2303	6.2395	5.3614	8.9709	9.146	8.0641
ENSMUSG00000048373	Fgfbp1	3.2159	0		7.0226	5.8552	7.1754	10.3252	9.9014	9.55
ENSMUSG00000020901	Pik3r5	3.2111	0		3.4743	3.4682	3.9858	6.5504	6.9133	5.3111
ENSMUSG00000085055	Gm15958	3.2084	0.0002		2.5928	2.5278	4.2481	6.4758	5.4329	5.8468
ENSMUSG00000105402	Gm3716	3.1927	0		6.0881	6.6857	6.5548	10.0356	9.2725	9.3671
ENSMUSG00000044330	Gm9790	3.1918	0		3.0117	3.2173	2.671	5.1745	5.5353	5.153
ENSMUSG00000032726	Bmp8a	3.1914	0		3.183	4.0328	3.252	6.9863	6.0086	4.9112
ENSMUSG00000106739	Gm43499	3.1838	0.0094		2.8174	2.2879	2.2599	3.749	4.7141	3.7668
ENSMUSG00000020151	Ptprr	3.1745	0		3.4743	3.3482	3.1272	6.0923	5.9847	5.3601
ENSMUSG00000004371	Il11	3.1742	0		4.2664	4.3148	4.3632	7.3205	6.5057	7.5961
ENSMUSG00000097028	Ptgs2os	3.1737	0.0001		3.0117	2.5278	3.252	5.731	5.2032	4.6204
ENSMUSG00000116114	Gm35853	3.172	0.0113		5.0205	6.4289	3.6651	9.2288	8.6292	6.4999
ENSMUSG00000026864	Hspa5	3.1695	0		13.5118	13.489	14.0343	17.0786	16.6845	16.8196
ENSMUSG00000112544	Gm48089	3.1666	0.0013		2.3266	3.3482	2.2599	4.9282	4.46	4.9755
ENSMUSG00000049985	Ankrd55	3.1646	0		3.0117	2.9133	4.4176	6.4449	5.6614	6.6846
ENSMUSG00000042745	Id1	3.1582	0		7.3082	7.1921	7.4861	10.4395	10.6614	10.2517
ENSMUSG00000020620	Abca8b	3.1509	0.0012		3.6006	2.9133	2.8396	6.6074	4.1515	4.6988
ENSMUSG00000097146	Gm4211	3.1487	0.0151		2.5928	2.5278	2.2599	4.7371	4.0629	3.0214
ENSMUSG00000038155	Gstp2	3.1411	0		2.8174	3.3482	3.3669	5.9452	5.6614	5.2603
ENSMUSG00000032502	Stac	3.1387	0.0155		2.3266	2.7334	2.2599	4.7371	3.8673	3.2468
ENSMUSG00000086631	Gm12784	3.1349	0		4.0176	4.4375	3.7522	7.312	7.0464	6.0094
ENSMUSG00000028121	Bcar3	3.1322	0		9.026	8.7084	7.9262	12.1229	12.0344	10.6582
ENSMUSG00000036533	Cdc42ep3	3.1289	0		5.5132	6.2562	7.0173	8.6998	9.4985	9.933
ENSMUSG00000026354	Lct	3.1268	0.0006		2.5928	3.9527	3.252	6.7408	5.7206	4.2558
ENSMUSG00000006494	Pdk1	3.1246	0		10.0745	11.7495	9.6451	14.1992	13.8185	13.6737
ENSMUSG00000061815	Rufy4	3.1182	0.0009		3.0117	2.5278	2.671	5.1745	4.93	3.9054
ENSMUSG00000056758	Hmga2	3.1002	0		10.0731	9.3939	9.5404	13.3728	12.552	12.193
ENSMUSG00000034205	Loxl2	3.0985	0		2.8174	3.3482	3.7522	6.6351	5.2839	5.153
ENSMUSG00000085511	Gm11738	3.0949	0.0012		2.5928	2.7334	2.8396	5.318	4.5926	3.9054
ENSMUSG00000110498	A630001O12Rik	3.092	0.0015		2.8174	2.2879	3.1272	5.5097	4.2351	4.4496
ENSMUSG00000031486	Adgra2	3.0842	0.0004		2.3266	3.7779	3.4733	6.314	5.9847	4.4496
ENSMUSG00000031886	Ces2e	3.0815	0.0057		2.5928	2.7334	2.2599	4.7371	3.9684	3.9054
ENSMUSG00000042216	Sgsm1	3.0814	0.001		3.336	3.6819	2.48	6.2617	5.8587	3.9054
ENSMUSG00000023067	Cdkn1a	3.0794	0		10.7504	10.7923	9.6774	14.3249	13.4915	12.0831
ENSMUSG00000037509	Arhgef4	3.075	0		4.6045	4.972	3.8344	7.9302	7.1361	6.8135
ENSMUSG00000030093	Wnt7a	3.0733	0		9.5836	9.802	10.1896	13.4388	12.7655	12.4637
ENSMUSG00000020108	Ddit4	3.0681	0		10.2449	11.5924	10.4625	14.476	13.776	13.4257
ENSMUSG00000024778	Fas	3.0563	0.005		3.336	2.2879	4.056	7.0076	4.6546	4.4496
ENSMUSG00000026726	Cubn	3.053	0		4.7202	5.3918	6.23	8.5624	8.3583	8.6616
ENSMUSG00000085282	Gm15663	3.0529	0		4.4786	4.604	5.2158	8.3153	6.9874	7.3633
ENSMUSG00000032515	Csrnp1	3.0486	0		7.3082	7.5526	7.9587	11.3325	10.2863	9.9808
ENSMUSG00000001946	Esam	3.041	0		3.336	3.0733	3.1272	5.9003	5.397	5.0963
ENSMUSG00000032322	Pstpip1	3.0405	0.0009		2.3266	3.0733	2.671	4.9723	4.3889	4.6204
ENSMUSG00000110404	Rnf223	3.0291	0		3.183	3.579	2.9906	5.7815	6.0086	4.9112
ENSMUSG00000020695	Mrc2	3.0259	0.0002		2.8174	4.2493	2.9906	6.5792	6.0322	4.9112
ENSMUSG00000111825	Gm10646	3.018	0		3.6006	2.9133	3.5724	6.0923	5.2839	5.9783
ENSMUSG00000091712	Sec14l5	3.0168	0.012		3.183	2.7334	2.8396	6.1317	4.46	2.7541
ENSMUSG00000110239	Gm45620	3.0145	0.0001		3.0117	2.7334	3.7522	4.8358	6.1006	5.5831
ENSMUSG00000104140	Gm37140	3.008	0.0025		2.5928	2.5278	2.671	4.326	4.6546	4.0319
ENSMUSG00000041168	Lonp1	3.001	0		11.5489	11.829	11.7552	14.775	14.6865	14.6829
ENSMUSG00000079173	Zan	2.9974	0		5.4475	4.972	4.5692	8.5147	8.0126	6.2625
ENSMUSG00000116270	Gm1600	2.9967	0.0246		3.336	3.579	2.2599	6.4911	5.0731	2.4258
ENSMUSG00000045679	Pqlc3	2.996	0		6.9884	6.2562	6.3325	9.9948	9.4921	8.7654
ENSMUSG00000026107	Nabp1	2.9914	0		8.8874	8.7206	9.03	12.2559	11.3516	11.8497
ENSMUSG00000023393	Slc17a9	2.9845	0.0002		3.6006	3.7779	3.252	6.9537	5.6309	4.4496
ENSMUSG00000046186	Cd109	2.9835	0		4.8782	6.1163	6.6933	9.0806	8.8374	9.0383
ENSMUSG00000071042	Rasgrp3	2.9822	0.0002		3.4743	3.579	6.1032	7.2417	8.267	7.5546
ENSMUSG00000046318	Ccbe1	2.981	0		8.0564	7.6762	10.2813	12.5301	11.9434	11.8182
ENSMUSG00000114409	Gm9042	2.9785	0.0662		2.5928	2.2879	2.2599	2.558	4.6546	3.2468
ENSMUSG00000085389	1700003M07Rik	2.9696	0.0059		2.8174	3.0733	2.671	5.5683	5.0269	3.0214
ENSMUSG00000117764	Gm50143	2.9675	0.0043		2.5928	2.2879	2.8396	3.9387	4.5279	4.4496
ENSMUSG00000086754	Gm16098	2.9654	0.0017		2.8174	2.7334	2.671	4.1833	4.2351	5.2603
ENSMUSG00000091635	Vmn2r13	2.9468	0.0005		3.0117	2.7334	2.8396	5.318	4.2351	4.8438
ENSMUSG00000020184	Mdm2	2.9452	0		11.2395	10.8236	11.0418	14.5773	13.8855	13.1598
ENSMUSG00000032374	Plod2	2.9401	0		9.3983	10.3953	9.6691	13.182	12.9431	12.1404
ENSMUSG00000062151	Unc13c	2.9399	0		6.577	6.5289	5.3614	9.6271	9.4024	7.6758
ENSMUSG00000117446	Gm35551	2.9333	0		2.8174	3.7779	3.1272	5.806	5.6614	5.3111
ENSMUSG00000019850	Tnfaip3	2.9295	0		8.7579	8.2285	9.1491	12.0108	11.0767	11.7917
ENSMUSG00000108472	Gm45212	2.9292	0		3.336	3.6819	4.3068	5.9452	6.7093	6.3861
ENSMUSG00000117270	Gm49953	2.9288	0.0007		2.5928	3.0733	2.8396	4.2564	4.7141	5.3601
ENSMUSG00000032261	Sh3bgrl2	2.9212	0		9.7948	9.6892	9.4175	12.8308	12.8098	11.8182
ENSMUSG00000032359	Ctsh	2.9157	0		7.9478	8.1273	6.9266	10.9136	10.8701	9.9749
ENSMUSG00000001627	Ifrd1	2.9124	0		9.8177	9.5068	10.3094	13.2392	12.5735	12.5469
ENSMUSG00000097081	Gm10425	2.9122	0		5.15	4.4375	6.0002	8.4104	7.9273	7.9881
ENSMUSG00000010751	Tnfrsf22	2.9064	0		7.8995	7.5113	7.1354	10.6458	10.8135	9.5043
ENSMUSG00000021118	Plek2	2.9061	0		5.0205	4.7532	5.4422	7.8963	8.4398	6.7596
ENSMUSG00000005087	Cd44	2.8976	0		9.2302	9.0392	9.2023	12.3858	11.9673	11.7095
ENSMUSG00000027956	Tmem144	2.8973	0		8.778	7.5795	9.3193	11.7255	11.4324	11.6577
ENSMUSG00000073771	Btbd19	2.896	0		7.9239	7.8409	7.8143	11.4482	10.145	10.2088
ENSMUSG00000109695	Gm31166	2.8882	0		4.0176	4.604	2.9906	7.0076	6.4544	5.9783
ENSMUSG00000062296	Trank1	2.8875	0		7.9117	7.5321	7.2219	10.8028	10.4678	9.9208
ENSMUSG00000066278	Vps37b	2.8861	0		9.5624	9.7949	9.3317	12.9708	12.3269	11.8433
ENSMUSG00000097651	4930461G14Rik	2.8784	0		8.5739	8.513	7.5051	11.5371	11.301	10.2838
ENSMUSG00000116321	Gm49522	2.8634	0		3.4743	3.3482	3.3669	5.097	6.1227	5.6635
ENSMUSG00000031770	Herpud1	2.8573	0		10.2057	9.9639	10.2442	13.1151	12.4886	13.2718
ENSMUSG00000111324	Gm31410	2.8475	0		4.0176	3.868	4.6164	7.3872	6.3829	6.21
ENSMUSG00000059900	Tmem40	2.8456	0.0018		3.183	4.0328	2.2599	5.6246	6.0553	4.6988
ENSMUSG00000024190	Dusp1	2.8439	0		7.6811	8.4812	8.9947	11.922	10.8545	10.892
ENSMUSG00000108563	Gm44686	2.8405	0.0012		2.3266	3.3482	3.1272	5.6246	4.7712	4.4496
ENSMUSG00000006445	Epha2	2.8274	0		11.168	11.1456	11.4921	14.0787	14.1386	14.0911
ENSMUSG00000086443	4933421A08Rik	2.8256	0.0015		3.183	3.0733	2.8396	5.5393	3.7586	5.3601
ENSMUSG00000030641	Ddias	2.8204	0		9.3631	8.5677	9.075	12.5609	11.5182	11.0291
ENSMUSG00000022598	Psca	2.8202	0.0006		3.336	3.9527	3.6651	6.4758	6.5224	4.0319
ENSMUSG00000021214	Akr1c18	2.8194	0.0034		2.8174	2.7334	2.48	4.6311	4.314	4.1482
ENSMUSG00000097715	Gpr137b-ps	2.8173	0		8.9598	8.7681	8.8242	11.8429	11.8571	11.1785
ENSMUSG00000036944	Tmem71	2.8158	0		5.8546	5.265	5.4937	8.446	8.2113	8.0934
ENSMUSG00000041827	Oasl1	2.8138	0		5.803	6.2225	4.2481	9.0398	8.3905	6.831
ENSMUSG00000000628	Hk2	2.8132	0		11.6055	11.828	12.5521	15.3356	14.4502	14.6585
ENSMUSG00000026822	Lcn2	2.8124	0		8.2945	8.3816	7.6707	10.9805	10.7981	11.0367
ENSMUSG00000043289	Mei4	2.8112	0.0002		3.6006	2.2879	3.6651	5.6246	5.2839	5.5831
ENSMUSG00000023951	Vegfa	2.8051	0		10.3764	11.0906	10.0408	13.3729	13.3677	13.3774
ENSMUSG00000045027	Prss22	2.8036	0.0025		2.3266	4.7051	2.8396	6.314	5.9104	5.8119
ENSMUSG00000097812	Gm26812	2.7991	0.0023		3.0117	2.7334	3.1272	3.749	5.0269	5.5412
ENSMUSG00000034457	Eda2r	2.7988	0		9.3316	8.2412	8.4891	12.2348	11.4994	10.3415
ENSMUSG00000044499	Hs3st5	2.7948	0.0163		3.0117	2.2879	2.8396	4.7371	5.0269	3.0214
ENSMUSG00000007379	Dennd2c	2.788	0		6.3798	6.2728	6.1032	9.3999	9.0397	8.2642
ENSMUSG00000020788	Atp2a3	2.7875	0.0001		4.1054	3.579	3.5724	6.9755	5.5679	5.2077
ENSMUSG00000050335	Lgals3	2.7848	0		11.5518	11.8406	10.8521	14.3182	14.3964	14.0218
ENSMUSG00000098433	Mir6391	2.7848	0.009		2.5928	2.7334	2.8396	3.4076	4.3889	5.153
ENSMUSG00000026479	Lamc2	2.7837	0		9.501	10.8439	8.0815	13.2525	12.7302	11.4942
ENSMUSG00000090248	Gm14027	2.7811	0.0071		2.3266	3.2173	2.9906	5.5097	4.6546	3.6134
ENSMUSG00000030730	Atp2a1	2.7808	0.0011		2.3266	3.2173	3.3669	4.4559	4.9793	5.5831
ENSMUSG00000072623	Zfp9	2.7802	0		5.7495	5.642	6.388	8.8162	8.4529	8.7191
ENSMUSG00000109299	Gm45164	2.7771	0.0092		2.5928	2.5278	2.8396	4.9282	3.9684	3.7668
ENSMUSG00000041920	Slc16a6	2.7734	0		6.0881	5.4801	5.683	9.304	7.3479	7.9881
ENSMUSG00000118367	Gm50277	2.7726	0		4.5429	4.3148	4.6164	7.902	6.3458	6.1555
ENSMUSG00000102148	Gm38059	2.7713	0.0087		3.183	3.2173	2.9906	5.015	6.1006	3.0214
ENSMUSG00000042678	Myo15	2.7564	0.0004		3.4743	4.1086	3.4733	6.8153	5.9604	4.4496
ENSMUSG00000021306	Gpr137b	2.7558	0		10.1435	10.0944	9.5631	13.1315	12.8401	11.8737
ENSMUSG00000101191	Gm28809	2.7555	0		5.803	5.5084	5.9083	8.4064	8.2818	8.5391
ENSMUSG00000030584	Dpf1	2.7542	0		6.1513	5.9407	6.3325	8.8696	9.127	8.4169
ENSMUSG00000085569	Gm12602	2.7538	0		5.15	5.7407	5.705	8.1714	8.4442	7.9645
ENSMUSG00000025791	Pgm1	2.7485	0		10.2437	11.0521	10.0938	13.3252	13.3454	13.1389
ENSMUSG00000052415	Tchh	2.7462	0.0006		2.8174	3.579	2.671	5.2834	5.2839	4.5375
ENSMUSG00000097998	Gm27019	2.7461	0		3.4743	4.1086	3.4733	6.0518	5.8848	6.1555
ENSMUSG00000072812	NA	2.7392	0		8.006	8.8366	7.8931	11.7044	11.1545	9.3879
ENSMUSG00000036611	Eepd1	2.7363	0		4.7202	5.1259	4.947	7.7329	7.7109	6.9479
ENSMUSG00000115882	Gm5481	2.7329	0.0003		3.336	3.0733	2.671	4.8358	5.3226	4.7731
ENSMUSG00000065610	Mir29a	2.7324	0.0002		3.7167	4.5506	5.4682	6.4911	6.2284	8.2707
ENSMUSG00000031450	Grk1	2.7318	0.0088		3.4743	2.5278	3.1272	6.0722	4.2351	3.9054
ENSMUSG00000048285	Frmd6	2.7296	0		9.2424	9.3977	9.7949	12.1962	12.3966	12.0489
ENSMUSG00000028645	Slc2a1	2.7277	0		12.5904	12.971	11.7513	15.4419	15.3164	14.9423
ENSMUSG00000017390	Aldoc	2.7265	0		6.817	7.5458	6.3743	9.8234	9.9014	9.2286
ENSMUSG00000024268	Celf4	2.7244	0		5.6064	4.6554	5.8503	7.8078	8.4398	7.8576
ENSMUSG00000025473	Adam8	2.7228	0		5.6362	6.1879	6.3605	8.9267	9.3187	7.3267
ENSMUSG00000005148	Klf5	2.7224	0		9.7289	9.8106	9.2386	12.7419	12.3878	11.6583
ENSMUSG00000036067	Slc2a6	2.7222	0		5.4475	5.265	4.947	8.263	7.7255	7.2765
ENSMUSG00000114285	Gm47773	2.7217	0.0035		3.4743	3.2173	2.2599	4.5167	5.6309	4.6204
ENSMUSG00000038418	Egr1	2.7191	0		9.5468	8.9284	8.3247	12.6676	10.9596	10.71
ENSMUSG00000024427	Spry4	2.7046	0		6.6518	5.7876	5.3049	8.378	9.1133	8.2961
ENSMUSG00000018920	Cxcl16	2.702	0		7.0995	7.425	6.9996	10.5867	9.3377	9.2053
ENSMUSG00000028755	Cda	2.702	0		5.8546	6.8713	5.6149	9.0705	9.3933	7.4899
ENSMUSG00000003865	Gys1	2.7007	0		10.2497	11.0424	9.6885	13.3868	13.0856	12.8763
ENSMUSG00000021281	Tnfaip2	2.6962	0		11.0049	10.8734	10.8459	13.8946	13.76	13.0067
ENSMUSG00000026880	Stom	2.6962	0		8.8624	9.2979	8.6734	11.6987	12.05	11.0423
ENSMUSG00000064023	Klk8	2.6899	0.0855		2.3266	2.5278	2.48	3.4076	4.5926	2.4258
ENSMUSG00000081562	Gm11575	2.6887	0.0239		2.5928	2.5278	2.48	3.4076	4.3889	3.9054
ENSMUSG00000035818	Plekhs1	2.687	0.0003		5.2303	6.7102	4.7064	7.7201	9.3796	7.1427
ENSMUSG00000109366	Gm44698	2.6848	0.0002		3.183	3.2173	3.252	4.8358	5.8321	4.8438
ENSMUSG00000008129	Brme1	2.6834	0		4.9272	5.4513	5.5914	8.7096	7.0579	7.4106
ENSMUSG00000087141	Plcxd2	2.6812	0		9.976	9.7949	10.0277	13.4828	11.641	12.0168
ENSMUSG00000034845	Plvap	2.6767	0		3.6006	3.2173	3.9858	5.9003	6.0322	5.6239
ENSMUSG00000096655	1700065D16Rik	2.6758	0.0007		2.8174	2.7334	3.252	5.015	4.7141	4.6988
ENSMUSG00000021196	Pfkp	2.6729	0		11.5832	11.6064	10.9486	14.2822	13.8613	14.0682
ENSMUSG00000081137	BC022960	2.6725	0		3.336	4.5506	4.8317	6.6889	7.1252	6.5217
ENSMUSG00000104917	Gm43289	2.6725	0		4.2664	4.2493	4.1229	6.7021	6.5057	6.5641
ENSMUSG00000108736	Gm45151	2.6695	0		4.5429	3.9527	3.7522	7.0899	6.3077	5.6239
ENSMUSG00000095280	NA	2.6663	0.0056		4.1054	3.9527	5.019	5.806	4.3889	8.1007
ENSMUSG00000105528	Gm43519	2.6654	0		4.4113	3.4682	4.3632	6.2617	6.7382	6.4555
ENSMUSG00000086665	Gm13067	2.6585	0		4.4113	4.7051	4.7494	7.2417	7.2807	6.6256
ENSMUSG00000025969	Nrp2	2.6506	0		7.7509	8.774	8.0475	10.9629	11.2858	10.237
ENSMUSG00000022952	Runx1	2.6475	0		8.7545	9.5669	9.9845	12.5329	11.9427	11.924
ENSMUSG00000043488	Frmd8os	2.6469	0		3.8241	4.4951	3.7522	7.1098	5.6614	5.9465
ENSMUSG00000117310	Ptp4a1	2.6458	0.0015		2.5928	2.7334	3.3669	4.8358	4.93	4.5375
ENSMUSG00000041798	Gck	2.6446	0.0032		3.7167	5.2978	2.8396	6.0722	7.549	5.7762
ENSMUSG00000100158	Gm28119	2.643	0.0075		2.3266	3.2173	2.9906	4.1833	5.3603	4.1482
ENSMUSG00000074625	Arhgap40	2.6429	0.0031		4.0176	4.7051	3.4733	7.3205	6.539	4.0319
ENSMUSG00000044471	Lncpint	2.6399	0		7.8239	7.5252	7.5724	10.322	10.3626	10.0793
ENSMUSG00000015981	Stk32c	2.6398	0.0023		3.336	3.4682	3.4733	6.2793	5.5353	3.7668
ENSMUSG00000097779	4833407H14Rik	2.6356	0.0305		3.7167	2.5278	2.2599	5.5967	4.5279	3.4417
ENSMUSG00000118386	Gm50149	2.6356	0.0485		2.5928	2.2879	2.48	3.4076	3.3724	4.2558
ENSMUSG00000074945	Olfr1314	2.6342	0.0009		4.1054	2.9133	3.3669	6.0311	6.0322	4.4496
ENSMUSG00000079575	Rbpj-ps3	2.6342	0.0005		3.0117	3.0733	3.5724	5.6788	5.3603	4.4496
ENSMUSG00000078653	Cntd1	2.6328	0		3.7167	4.4951	4.1868	6.8976	6.6946	5.6239
ENSMUSG00000050022	Amz1	2.6326	0		4.9746	5.2315	4.8712	7.4509	7.8164	7.1842
ENSMUSG00000114687	Gm5452	2.6313	0.0058		3.0117	3.3482	2.2599	4.4559	5.2032	4.3559
ENSMUSG00000049128	Ivl	2.6273	0.018		3.6006	2.7334	2.48	5.7815	3.7586	4.1482
ENSMUSG00000055926	Gm14137	2.6188	0		4.3407	6.1704	5.2158	7.9957	8.1958	7.544
ENSMUSG00000037855	Zfp365	2.6163	0		5.9992	5.642	6.3466	9.2197	8.5001	7.4677
ENSMUSG00000108668	Gm32816	2.6163	0.0473		2.5928	2.2879	2.8396	2.7726	4.314	4.5375
ENSMUSG00000078249	Hmga1b	2.616	0.0023		3.183	3.6819	2.48	5.0566	5.6614	4.4496
ENSMUSG00000013089	Etv5	2.6151	0		8.7847	7.4175	7.9356	10.6509	10.8595	10.745
ENSMUSG00000075569	Rsph10b	2.6134	0.0005		3.0117	3.868	3.1272	6.0311	5.2839	4.6988
ENSMUSG00000074065	Gm10617	2.6126	0.0005		3.0117	3.3482	2.8396	5.1745	5.0269	4.6204
ENSMUSG00000093042	Mir3109	2.6097	0		4.1881	4.1086	3.1272	6.1121	6.1445	6.0398
ENSMUSG00000008136	Fhl2	2.6089	0		7.8933	7.9167	9.1789	10.9512	11.0781	11.1447
ENSMUSG00000024610	Cd74	2.6051	0.0218		2.5928	3.0733	2.2599	3.5306	4.314	4.6204
ENSMUSG00000087684	1200007C13Rik	2.6037	0.0162		2.3266	2.9133	3.252	5.4486	4.0629	3.7668
ENSMUSG00000025432	Avil	2.602	0		5.343	5.8985	5.1531	8.1331	7.605	8.1711
ENSMUSG00000044017	Adgrd1	2.6011	0.0124		2.5928	3.2173	3.4733	5.8302	5.0731	3.2468
ENSMUSG00000088552	Mir1957a	2.5976	0		3.8241	4.7997	3.3669	6.2074	6.5553	6.4555
ENSMUSG00000098055	Gm26947	2.5969	0.012		2.8174	2.7334	2.671	4.4559	4.7712	3.4417
ENSMUSG00000043822	Adamtsl5	2.5968	0		5.722	6.8713	5.8102	8.496	8.9864	8.779
ENSMUSG00000075704	Txnrd2	2.5913	0		9.3961	8.8505	9.3838	12.4682	11.2889	11.365
ENSMUSG00000010067	Rassf1	2.5888	0		9.0372	9.2837	9.2832	12.2399	11.6415	11.3254
ENSMUSG00000022051	Bnip3l	2.5869	0		11.3145	12.253	11.2535	14.3047	14.4903	13.9645
ENSMUSG00000025020	Slit1	2.5869	0		3.9241	4.4951	3.1272	6.3809	6.4011	5.6239
ENSMUSG00000086003	B230206L02Rik	2.5845	0		4.8782	5.089	4.5692	7.3625	7.3849	7.0107
ENSMUSG00000044313	Mab21l3	2.5811	0.0024		5.1081	3.7779	5.3889	8.4104	5.3226	6.6256
ENSMUSG00000087159	Gm15246	2.5795	0.0001		2.8174	4.1806	3.4733	5.3518	5.8848	5.8808
ENSMUSG00000023034	Nr4a1	2.5777	0		6.3798	6.2728	5.4422	8.887	8.9122	7.6365
ENSMUSG00000115505	Gm9247	2.5768	0.0017		3.0117	3.0733	2.8396	4.3924	5.2032	4.5375
ENSMUSG00000036091	Hyal3	2.5754	0.0315		3.6006	3.0733	3.252	6.5792	3.7586	3.2468
ENSMUSG00000046133	C130073F10Rik	2.572	0.0005		3.4743	2.9133	3.4733	5.318	5.7493	4.5375
ENSMUSG00000063229	Ldha	2.5706	0		13.198	14.3307	12.9254	16.2974	16.2426	16.0167
ENSMUSG00000046711	Hmga1	2.5682	0		10.2901	10.3481	9.6221	12.76	12.9767	12.2189
ENSMUSG00000111079	Gm47112	2.5624	0		4.0176	3.0733	3.6651	5.5683	5.7206	5.914
ENSMUSG00000062753	AI413582	2.5596	0		7.0339	6.7463	7.3461	9.1056	9.9173	9.6271
ENSMUSG00000104701	Gm42555	2.559	0.0113		3.0117	2.2879	3.9858	5.5393	4.0629	5.6239
ENSMUSG00000042807	Hecw2	2.5584	0.0103		3.0117	3.0733	2.8396	5.015	5.2441	3.2468
ENSMUSG00000055493	Epm2a	2.5574	0		3.8241	4.8447	5.0537	7.3459	6.3077	7.2377
ENSMUSG00000021798	Ldb3	2.5567	0.0136		2.8174	3.3482	2.671	5.5967	3.7586	4.1482
ENSMUSG00000010362	Rdm1	2.5536	0		7.6595	7.9167	7.731	10.0524	10.7105	10.046
ENSMUSG00000040675	Mthfd1l ENSMUSG00000040675	2.5534	0		10.0718	9.9106	10.1073	12.6611	12.359	12.7003
ENSMUSG00000110730	Gm19385	2.5533	0.0237		2.3266	2.5278	3.3669	4.9723	4.5926	3.4417
ENSMUSG00000005057	Sh2b2	2.5522	0.0001		3.4743	3.7779	3.9121	5.8773	6.4191	4.9755
ENSMUSG00000027313	Chac1	2.5501	0		8.3762	7.5729	8.8091	10.722	10.7843	11.0904
ENSMUSG00000067212	H2-T23	2.546	0		4.5429	6.2225	5.2461	7.9957	8.0303	7.7876
ENSMUSG00000021123	Rdh12	2.5433	0		5.6362	4.8884	5.3614	8.0888	7.9645	6.8989
ENSMUSG00000050931	Sgms2	2.5424	0		10.5894	10.3618	9.9178	13.0665	12.8136	12.6512
ENSMUSG00000086719	Gm16275	2.5419	0.0188		3.336	2.5278	2.2599	3.9387	4.3889	4.6204
ENSMUSG00000097021	4933433G15Rik	2.5419	0		4.1054	4.1806	3.7522	6.3972	6.3458	5.8808
ENSMUSG00000042751	Nmnat2	2.54	0		6.5459	5.9198	5.9823	9.192	8.8473	7.2892
ENSMUSG00000034773	Hrob	2.5387	0		8.0286	7.425	8.0773	10.8217	10.207	10.0138
ENSMUSG00000029797	Sspo	2.5375	0.0055		3.336	3.868	3.252	6.4758	3.8673	5.2077
ENSMUSG00000100291	2310069B03Rik	2.5338	0.001		3.8241	3.6819	4.3068	6.997	5.9604	4.5375
ENSMUSG00000108456	4732496C06Rik	2.5315	0.0001		4.8782	4.7051	4.1229	7.7265	6.5874	5.7396
ENSMUSG00000022346	Myc	2.5299	0		9.7306	10.1118	9.9178	12.5735	12.0874	12.6398
ENSMUSG00000102380	Gm38140	2.5297	0		3.8241	4.0328	4.6164	6.9755	5.8321	6.3133
ENSMUSG00000117648	Gm32282	2.5291	0.0113		2.8174	3.2173	2.2599	4.3924	4.6546	4.1482
ENSMUSG00000026456	Cyb5r1	2.5246	0		9.3429	9.1442	9.6047	11.7577	11.5094	12.2998
ENSMUSG00000105356	Gm42603	2.5239	0		5.4807	5.3612	6.1032	7.654	8.0067	8.5603
ENSMUSG00000034640	Tiparp	2.522	0		10.012	9.6245	10.0386	12.6304	12.7311	11.691
ENSMUSG00000026452	Syt2	2.5208	0.0488		2.3266	2.9133	3.252	5.5097	2.8436	4.1482
ENSMUSG00000114053	Gm35330	2.5187	0.0028		3.336	3.0733	3.6651	6.2074	4.46	4.6988
ENSMUSG00000086775	Snhg7os	2.5164	0		4.1881	5.051	5.3889	6.9863	7.0231	7.8142
ENSMUSG00000004791	Pgf	2.5152	0.0243		2.3266	3.2173	2.9906	4.1833	5.397	3.4417
ENSMUSG00000021411	Pxdc1	2.5143	0		8.3629	8.22	8.6565	10.853	11.1123	10.7916
ENSMUSG00000024164	C3	2.5081	0.002		3.183	3.3482	3.4733	4.8358	6.0782	4.3559
ENSMUSG00000005125	Ndrg1	2.507	0		12.8906	13.5146	11.8916	15.8746	15.3329	14.8668
ENSMUSG00000019852	Arfgef3	2.5034	0		8.8337	8.9258	9.3562	11.6307	11.5088	11.5147
ENSMUSG00000085771	C230066G23Rik	2.5022	0.0197		2.8174	2.7334	2.9906	3.847	5.3226	3.6134
ENSMUSG00000064267	Hvcn1	2.5002	0.0035		4.8782	5.1971	2.9906	7.6874	6.8616	5.2603
ENSMUSG00000017943	Gdap1l1	2.4987	0.0083		2.3266	3.7779	3.1272	5.731	4.3889	4.6988
ENSMUSG00000028680	Plk3	2.4981	0		7.7711	7.2518	7.2596	10.3742	10.0885	8.9206
ENSMUSG00000109708	Gm45809	2.4957	0		4.1054	3.7779	3.9121	5.9003	6.5874	5.5412
ENSMUSG00000039191	Rbpj	2.4862	0		10.9636	10.7352	10.7447	13.5446	13.3628	12.9309
ENSMUSG00000085274	BC046401	2.4851	0		4.1054	3.2173	3.9858	5.9229	5.7493	6.0696
ENSMUSG00000022176	Rem2	2.4831	0		4.1881	4.1806	4.8712	6.4911	6.9133	6.7037
ENSMUSG00000000223	Drp2	2.4823	0.0005		4.2664	4.604	4.4176	7.4969	6.5874	4.9112
ENSMUSG00000002983	Relb	2.4817	0		7.9655	8.5025	8.6366	10.9171	10.7634	10.9106
ENSMUSG00000084616	NA	2.4816	0		4.8782	4.972	3.9858	7.1391	6.8616	6.8135
ENSMUSG00000014905	Dnajb9	2.4811	0		8.6956	8.8697	8.508	11.3659	10.8644	11.228
ENSMUSG00000115249	Gm49085	2.4751	0		3.4743	3.3482	3.7522	5.4794	5.6309	5.498
ENSMUSG00000085395	Gm13056	2.475	0		5.8546	5.877	5.6379	7.694	8.7263	7.8997
ENSMUSG00000103183	Gm37090	2.4738	0		5.343	6.1163	4.3632	7.2507	8.262	7.714
ENSMUSG00000116771	Gm49691	2.472	0.0961		2.5928	2.2879	2.671	4.3924	3.8673	2.4258
ENSMUSG00000097921	Gm26576	2.4693	0.0137		3.0117	2.5278	3.5724	5.5393	4.879	3.6134
ENSMUSG00000102278	Gm37145	2.4693	0		4.4113	4.4951	4.7494	6.2793	7.0231	7.0411
ENSMUSG00000016239	Lonrf3	2.4684	0		8.4619	7.8901	7.8786	10.7428	10.6163	10.255
ENSMUSG00000028862	Map3k6	2.4658	0		5.4135	5.1971	4.056	7.7457	6.6798	7.2765
ENSMUSG00000010095	Slc3a2	2.4646	0		11.8606	11.6762	11.8416	13.9797	14.2992	14.4564
ENSMUSG00000012519	Mlkl	2.4596	0		7.2026	6.501	6.7994	9.1661	9.5826	9.027
ENSMUSG00000063011	Msln	2.4584	0		11.0995	11.8803	11.3509	14.0889	14.2609	13.2909
ENSMUSG00000056501	Cebpb	2.4564	0		8.006	8.2454	8.5572	10.8111	10.3924	10.9331
ENSMUSG00000025092	Hspa12a	2.4559	0.0014		4.8782	5.5634	5.3334	8.7161	6.9133	5.5412
ENSMUSG00000041801	Phlda3	2.4552	0		9.8306	9.2038	10.0792	12.8547	11.6918	11.7271
ENSMUSG00000039384	Dusp10	2.4495	0		8.8655	8.5372	8.9493	11.4961	11.1179	11.0442
ENSMUSG00000046814	Gchfr	2.4462	0.0023		2.5928	2.9133	3.8344	4.8827	5.2032	5.0963
ENSMUSG00000051022	Hs3st1	2.4457	0.0002		5.2303	5.4219	3.8344	7.2144	7.9398	6.0398
ENSMUSG00000051457	Spn	2.4456	0.0021		3.183	3.4682	4.1229	5.097	6.5057	4.7731
ENSMUSG00000087381	Gm16008	2.4351	0		5.9287	6.079	5.5676	7.8379	8.6408	8.0715
ENSMUSG00000112937	Gm17746	2.4332	0.0048		3.336	2.7334	2.8396	5.0566	4.314	4.4496
ENSMUSG00000039911	Spsb1	2.4317	0		7.0888	7.8847	7.7575	9.5031	10.2591	10.2021
ENSMUSG00000076448	Mir763	2.4308	0.008		2.5928	2.5278	3.4733	4.575	4.6546	4.5375
ENSMUSG00000040249	Lrp1	2.4262	0		7.1623	7.6447	7.5422	10.4326	10.0414	8.4849
ENSMUSG00000041842	Fhdc1	2.4258	0		7.6883	7.6383	8.5692	10.4512	10.4284	10.446
ENSMUSG00000086290	Snhg12	2.4204	0		8.006	8.081	8.69	10.3027	10.6105	11.0794
ENSMUSG00000021668	Polk	2.4117	0		9.1343	8.8778	8.69	11.7597	11.3143	10.6619
ENSMUSG00000087633	Gm14455	2.4089	0.0172		2.3266	2.9133	2.9906	4.6311	4.0629	4.0319
ENSMUSG00000113015	Gm6296	2.4048	0.0047		3.183	2.5278	3.5724	4.3924	5.3603	4.8438
ENSMUSG00000097440	Gm6277	2.4042	0.0664		2.3266	3.0733	2.2599	3.9387	4.314	3.2468
ENSMUSG00000041642	Kif21b	2.4025	0.0001		3.183	4.1806	3.7522	6.2617	5.5353	5.3601
ENSMUSG00000048779	P2ry6	2.4025	0.0482		2.5928	2.5278	2.8396	4.7371	3.641	3.2468
ENSMUSG00000004936	Map2k1	2.4019	0		10.2425	10.8173	10.3281	13.0156	12.877	12.7477
ENSMUSG00000025006	Sorbs1	2.4019	0		8.4619	8.0429	8.1672	11.0745	10.7394	9.7403
ENSMUSG00000029576	Radil	2.4008	0.0087		2.8174	2.9133	3.1272	3.749	4.93	4.8438
ENSMUSG00000027397	Slc20a1	2.3976	0		9.5131	9.304	10.0558	12.3715	11.9546	11.7617
ENSMUSG00000079334	Naa80	2.3927	0		7.4491	7.8901	7.5237	10.8698	9.3658	9.0937
ENSMUSG00000118032	Gm50147	2.3921	0.0752		2.3266	2.7334	2.8396	4.7873	3.7586	2.7541
ENSMUSG00000097145	9230114K14Rik	2.3903	0		6.5615	6.1704	6.0697	9.4803	7.9948	7.6563
ENSMUSG00000084399	Gm15666	2.3866	0.0065		3.0117	2.5278	3.4733	4.326	5.1611	4.6204
ENSMUSG00000089371	Mir1938	2.3857	0.0006		3.0117	3.4682	3.1272	4.9723	5.0731	4.9112
ENSMUSG00000011148	Adssl1	2.3807	0.0036		4.4113	4.1806	3.1272	6.5211	6.4191	4.3559
ENSMUSG00000018800	Abca5	2.3802	0		4.7202	5.2978	4.7912	7.4586	7.43	6.4327
ENSMUSG00000097039	Pvt1	2.3801	0		7.983	8.2028	7.9632	10.7171	10.4015	10.0516
ENSMUSG00000103622	Gm38391	2.3798	0		4.3407	5.3918	5.0537	7.5988	6.4888	7.3633
ENSMUSG00000082016	Pgam1-ps2	2.3766	0.0014		2.8174	3.4682	3.5724	5.015	5.6309	4.6204
ENSMUSG00000035678	Tnfsf9	2.376	0		6.0443	6.6857	5.3614	8.598	8.6598	7.9406
ENSMUSG00000111394	Gm49759	2.3721	0		8.5428	9.4127	8.8736	11.3388	11.5234	11.1707
ENSMUSG00000027858	Tspan2	2.369	0.0214		2.8174	3.0733	2.9906	5.3518	4.2351	3.4417
ENSMUSG00000064344	mt-Tm	2.3687	0.0104		3.183	2.2879	3.5724	4.7873	4.314	5.2077
ENSMUSG00000096917	2500002B13Rik	2.3658	0		5.4135	6.2562	6.0353	8.8696	7.7681	7.7604
ENSMUSG00000020388	Pdlim4	2.3654	0.0426		2.8174	2.9133	2.671	5.1362	3.5129	3.4417
ENSMUSG00000031557	Plekha2	2.3611	0		8.9947	9.669	9.8342	12.1486	11.485	11.9805
ENSMUSG00000031987	Egln1	2.3597	0		10.6232	11.1343	10.1581	13.3455	13.0768	12.6429
ENSMUSG00000042349	Ikbke	2.358	0		8.3495	8.5542	8.3702	11.3112	10.5967	10.1732
ENSMUSG00000029102	Hgfac	2.3557	0		10.3282	10.3314	9.8317	12.8554	12.4517	12.2202
ENSMUSG00000019916	P4ha1	2.3544	0		11.8031	12.3512	11.9526	14.5551	14.3609	14.295
ENSMUSG00000095186	Gm10718	2.352	0.0439		3.0117	3.0733	2.8396	3.749	3.2167	5.6239
ENSMUSG00000031273	Col4a6	2.3516	0.0333		3.0117	2.5278	3.1272	5.2834	3.9684	3.4417
ENSMUSG00000053746	Ptrh1	2.3442	0		7.7372	7.9008	8.3907	10.0841	10.4239	10.5501
ENSMUSG00000110165	Btf3-ps18	2.3415	0.0044		2.5928	3.4682	2.9906	4.6311	4.5926	4.9112
ENSMUSG00000090582	Gm17024	2.3406	0		4.7748	5.2315	4.947	7.2507	7.1789	7.1286
ENSMUSG00000021890	Eaf1	2.3397	0		10.2303	10.2842	10.2338	12.5372	12.8347	12.3412
ENSMUSG00000104591	Gm43145	2.3368	0.0987		2.5928	2.7334	2.48	2.558	4.5926	3.7668
ENSMUSG00000034751	Mast4	2.3318	0		10.2279	10.0542	9.4439	12.948	12.3084	10.8689
ENSMUSG00000032724	Abtb2	2.3295	0		7.4151	8.2538	7.7416	10.3326	10.1463	9.9631
ENSMUSG00000103364	Gm38157	2.3292	0.0018		3.0117	3.6819	3.5724	4.3924	5.6913	5.498
ENSMUSG00000090173	Fbxw10	2.3277	0.0031		2.5928	3.2173	3.3669	4.8827	4.7141	4.6988
ENSMUSG00000006205	Htra1	2.3249	0.0001		3.7167	4.3774	4.5204	6.8861	6.1006	5.6635
ENSMUSG00000115483	Gm9732	2.3249	0.0003		5.15	4.7051	4.9096	7.9904	6.6648	5.7396
ENSMUSG00000087366	Junos	2.3243	0.0019		3.7167	3.6819	3.5724	6.314	5.2839	4.4496
ENSMUSG00000031762	Mt2	2.3221	0.0003		7.0671	8.0763	8.4795	9.3423	9.0882	11.3262
ENSMUSG00000044005	Gls2	2.3221	0		4.8274	4.9308	5.6149	7.556	7.549	6.8822
ENSMUSG00000025089	Gfra1	2.3161	0.025		3.8241	4.972	3.252	6.8512	6.6344	3.4417
ENSMUSG00000020048	Hsp90b1	2.3151	0		13.9902	13.4942	13.8399	16.611	15.8483	15.6728
ENSMUSG00000024883	Rin1	2.3133	0		10.8813	10.8452	11.068	12.9042	13.4383	13.3414
ENSMUSG00000031381	Piga	2.313	0		8.5349	8.7971	8.1869	11.1285	10.9024	10.3415
ENSMUSG00000028642	Tmem269	2.3118	0.0348		2.5928	3.3482	2.2599	4.4559	4.0629	4.1482
ENSMUSG00000097960	A330074K22Rik	2.3074	0		4.0176	4.972	5.2461	6.8153	7.2807	6.7957
ENSMUSG00000031490	Eif4ebp1	2.2977	0		10.8194	10.5672	11.2656	13.0871	13.1271	13.3931
ENSMUSG00000085929	Gm13421	2.2953	0		5.2303	4.9308	5.6606	7.5193	7.4121	7.5226
ENSMUSG00000116604	Gm49745	2.2942	0.0472		2.3266	2.9133	2.671	3.5306	4.314	3.9054
ENSMUSG00000052525	Spdya	2.2933	0		3.8241	3.6819	4.1229	5.4794	6.2284	5.7021
ENSMUSG00000021701	Plk2	2.2886	0		12.5052	12.4583	13.5338	15.7048	14.5868	15.127
ENSMUSG00000115762	Gm34907	2.2869	0.0161		3.183	3.7779	2.48	5.5967	4.46	4.3559
ENSMUSG00000025225	Nfkb2	2.2833	0		10.4443	10.928	10.8964	12.6644	13.3001	13.1236
ENSMUSG00000028542	Slc6a9	2.2807	0		9.5111	9.1798	8.593	11.4966	11.3714	11.371
ENSMUSG00000007035	Msh5	2.2804	0		6.4146	5.9613	6.7259	9.3381	8.201	7.9243
ENSMUSG00000114282	5330431K02Rik	2.2771	0.0001		4.0176	3.9527	3.7522	5.0566	6.2284	6.0094
ENSMUSG00000105466	Gm42998	2.2766	0.0004		4.1881	3.4682	4.9096	5.731	6.1006	6.9318
ENSMUSG00000027356	Fermt1	2.2759	0.0015		5.803	7.1657	8.1869	8.0326	9.4985	10.3984
ENSMUSG00000049580	Tsku	2.2749	0		9.6833	9.5984	9.3562	11.8156	11.8714	11.7731
ENSMUSG00000075014	Gm10800	2.2748	0.054		6.5615	6.3529	7.36	7.8848	7.0464	10.2695
ENSMUSG00000003746	Man1a	2.2744	0		10.0947	9.4441	10.2619	12.6873	12.0895	11.8138
ENSMUSG00000111933	Gm36660	2.2719	0.0027		3.7167	3.0733	3.3669	5.652	5.1611	4.3559
ENSMUSG00000060621	Nkpd1	2.2713	0.0073		2.5928	4.0328	2.9906	5.417	4.879	4.8438
ENSMUSG00000023175	Bsg	2.2669	0		13.3104	13.5324	13.6586	15.705	15.6958	15.9112
ENSMUSG00000103731	Gm17530	2.2625	0.0311		2.3266	2.9133	2.9906	4.4559	4.1515	3.7668
ENSMUSG00000031530	Dusp4	2.2604	0		9.9977	9.5685	10.2656	12.2427	11.9427	12.4535
ENSMUSG00000009108	Gnat2	2.2601	0.0009		3.8241	3.6819	3.9858	6.3972	4.7712	5.5831
ENSMUSG00000023272	Creld2	2.2549	0		9.8063	9.7541	9.7937	12.5697	11.6164	11.7165
ENSMUSG00000004952	Rasa4	2.2539	0.0038		3.7167	4.4951	4.5204	6.8153	6.6648	4.3559
ENSMUSG00000109460	Gm45591	2.2529	0.0004		3.7167	3.0733	4.056	5.8302	5.4329	5.2077
ENSMUSG00000107741	Gm2011	2.2452	0		4.1054	4.7997	4.3068	6.5649	6.6344	6.0988
ENSMUSG00000109864	Eid3	2.2446	0		6.3621	6.2395	6.6372	8.1619	8.558	9.0078
ENSMUSG00000047810	Ccdc88b	2.2422	0.0184		3.0117	4.5506	4.1229	6.1888	6.6497	3.7668
ENSMUSG00000032231	Anxa2	2.2408	0		13.4339	13.7006	13.3599	15.7449	16.0053	15.4312
ENSMUSG00000041974	Spidr	2.2404	0		9.3896	9.1599	9.5661	11.847	11.6096	11.3446
ENSMUSG00000059040	Eno1b	2.2403	0		4.3407	4.8884	4.5692	5.652	6.8747	7.1
ENSMUSG00000045319	Proser2	2.2394	0		8.57	9.4331	8.3941	11.1309	11.5015	10.5112
ENSMUSG00000088015	Mir1932	2.2393	0.0262		3.183	2.5278	2.671	3.9387	4.1515	4.4496
ENSMUSG00000053714	4732471J01Rik	2.2381	0		6.4317	6.9963	6.6024	8.798	9.1648	8.6616
ENSMUSG00000073198	Bnip3l-ps	2.236	0		4.4786	4.4375	3.7522	5.8773	6.539	6.183
ENSMUSG00000045817	Zfp36l2	2.2339	0		11.3676	11.2393	11.1635	13.4449	13.7523	13.2277
ENSMUSG00000103251	Gm37519	2.2339	0.0081		3.183	2.9133	3.3669	4.1833	5.3603	4.5375
ENSMUSG00000010760	Phlda2	2.2337	0.0011		3.9241	3.6819	3.5724	5.731	6.0322	4.5375
ENSMUSG00000057454	Lypd3	2.2333	0.0605		3.183	4.7532	2.48	6.2968	5.9356	3.4417
ENSMUSG00000015962	1700016C15Rik	2.2321	0.0137		2.8174	2.9133	3.5724	4.7371	5.2839	3.9054
ENSMUSG00000103114	Gm32200	2.2314	0.0999		2.8174	2.9133	2.671	5.2117	3.0422	3.0214
ENSMUSG00000098146	Gm26935	2.2302	0.001		3.0117	3.6819	3.3669	5.248	5.1611	4.8438
ENSMUSG00000074305	Peak1	2.2248	0		9.8672	10.0446	8.9585	12.3337	12.259	10.5672
ENSMUSG00000037679	Inf2	2.2228	0		9.2993	9.206	8.8712	11.7199	11.5629	10.4894
ENSMUSG00000028654	Mycl	2.2207	0.0002		3.7167	3.3482	3.9121	5.731	5.5679	5.0963
ENSMUSG00000062070	Pgk1	2.2206	0		12.9478	13.5977	13.0233	15.4799	15.5081	15.3255
ENSMUSG00000019301	Hsd17b1	2.2184	0.0092		3.336	4.0328	4.1229	6.7021	4.3889	5.153
ENSMUSG00000097792	Gm27042	2.2126	0.0005		3.336	3.868	3.4733	5.1362	5.1178	5.7396
ENSMUSG00000041180	Hectd2	2.2119	0		4.6635	3.7779	4.3632	6.2438	6.2284	6.338
ENSMUSG00000044098	Rsbn1	2.2108	0		9.7427	9.669	9.394	12.02	11.8208	11.5646
ENSMUSG00000069808	Tlcd3a	2.2105	0		7.9888	7.7491	7.9402	10.1407	10.1368	9.9769
ENSMUSG00000026435	Slc45a3	2.2095	0		5.0205	5.4219	4.8317	7.1583	7.5971	6.6256
ENSMUSG00000021250	Fos	2.2092	0		7.2026	7.6699	6.8496	9.3735	9.7012	9.2645
ENSMUSG00000044006	Cilp2	2.2087	0.0696		2.8174	3.2173	2.2599	4.7371	3.2167	4.1482
ENSMUSG00000002602	Axl	2.2077	0		11.0629	11.8364	12.5653	13.8427	14.5412	13.9838
ENSMUSG00000002791	Pdxk-ps	2.2071	0.0006		3.7167	3.579	3.3669	5.652	5.3603	4.7731
ENSMUSG00000024661	Fth1	2.2066	0		13.5766	13.5368	12.3949	15.7596	15.8868	14.2873
ENSMUSG00000010830	Kdelr3	2.2041	0		7.6883	8.4267	7.4861	9.9974	10.3403	9.9651
ENSMUSG00000008384	Sertad1	2.1975	0		9.0372	9.2755	9.2253	11.0996	11.6662	11.295
ENSMUSG00000085156	Snhg15	2.1939	0		8.3405	7.9219	8.9969	11.0013	10.2802	10.641
ENSMUSG00000042851	Zc3h6	2.1933	0.0009		7.5227	7.79	7.0606	10.6593	9.2119	7.7045
ENSMUSG00000090207	4930524O07Rik	2.1933	0.0084		2.8174	3.6819	3.9121	4.685	4.7141	6.0696
ENSMUSG00000074415	Mir100hg	2.1912	0		6.7229	7.6125	6.518	9.0731	9.8125	8.2898
ENSMUSG00000029385	Ccng2	2.1907	0		10.362	11.4494	10.8083	13.4053	13.2954	12.5548
ENSMUSG00000044636	Csrnp2	2.1894	0.0002		9.6082	9.8594	9.8441	13.0103	10.9238	10.7747
ENSMUSG00000100865	Gm9320	2.1894	0		4.3407	4.604	4.8317	6.0722	6.4717	7.1
ENSMUSG00000086539	Gm16759	2.1893	0.0337		2.5928	2.9133	2.8396	3.6439	4.46	4.1482
ENSMUSG00000056771	Gm10010	2.1884	0.0049		3.8241	3.9527	3.7522	6.5792	5.0269	4.6204
ENSMUSG00000117975	Itprip	2.1871	0		9.9643	9.9614	10.3448	12.4055	12.5454	11.8
ENSMUSG00000053470	Kdm3a	2.1847	0		10.9985	11.7498	10.8838	14.1365	13.0304	12.7995
ENSMUSG00000100599	1700120C14Rik	2.1823	0		4.4113	4.7051	5.1848	7.2236	6.7944	6.2881
ENSMUSG00000107879	9330102E08Rik	2.182	0.0051		4.2664	3.7779	3.7522	6.6074	5.5997	4.3559
ENSMUSG00000032575	Manf	2.1804	0		10.6527	10.4326	10.9024	12.9221	12.5553	13.0391
ENSMUSG00000021025	Nfkbia	2.1802	0		8.385	8.4006	8.4109	11.0971	10.6689	9.5043
ENSMUSG00000028545	Bend5	2.1791	0		8.3762	8.4451	7.9216	10.8771	10.3427	9.9002
ENSMUSG00000104684	5430427N15Rik	2.1787	0.0286		3.336	3.3482	2.671	5.318	4.7141	3.4417
ENSMUSG00000029814	Igf2bp3	2.1672	0.0606		2.5928	2.5278	3.7522	5.417	3.8673	3.9054
ENSMUSG00000041515	Irf8	2.1647	0.002		5.5132	5.8104	4.7064	7.7393	8.0819	5.498
ENSMUSG00000025130	P4hb	2.1586	0		13.5668	13.8543	13.4831	16.1572	15.6587	15.5072
ENSMUSG00000004864	Mapk13	2.1572	0.0008		4.4786	5.162	4.1229	6.6351	7.2509	5.4076
ENSMUSG00000015312	Gadd45b	2.1546	0		8.203	9.2316	10.3013	11.7788	11.5649	11.5633
ENSMUSG00000031098	Syt8	2.1456	0		7.7164	8.6962	8.5752	10.6885	10.627	10.2088
ENSMUSG00000023952	Gtpbp2	2.1442	0		10.2242	10.4363	10.2376	12.4733	12.2683	12.5725
ENSMUSG00000110148	5830408C22Rik	2.1419	0		4.1054	4.7997	4.3632	6.314	6.0553	6.7037
ENSMUSG00000056671	Prelid2	2.1412	0.0172		3.183	2.9133	2.8396	4.7873	4.1515	4.1482
ENSMUSG00000044854	1700056E22Rik	2.1397	0		4.4113	5.0121	5.1531	7.3708	6.4717	6.6256
ENSMUSG00000107477	Gm44366	2.1386	0.002		3.0117	3.579	3.6651	4.685	5.2441	5.3601
ENSMUSG00000028128	F3	2.1345	0		8.9716	8.9569	9.1868	10.996	11.0219	11.4446
ENSMUSG00000104253	Gm37174	2.1325	0		4.0176	4.3148	4.5692	6.4449	5.5997	6.4555
ENSMUSG00000035179	Ppp1r32	2.1311	0.0029		3.4743	3.579	3.3669	5.248	5.5353	4.3559
ENSMUSG00000066632	Pgk1-rs7	2.1295	0.0438		2.5928	3.0733	2.9906	3.4076	4.8261	4.2558
ENSMUSG00000028801	Stpg1	2.1256	0.0942		2.3266	2.9133	3.252	4.8358	4.3889	2.7541
ENSMUSG00000085665	Gm12059	2.1256	0.0164		4.1054	2.9133	3.7522	6.2617	4.6546	4.5375
ENSMUSG00000000706	Btn1a1	2.1255	0.0161		2.5928	3.9527	2.9906	5.2117	4.879	4.4496
ENSMUSG00000105848	Gm42683	2.1189	0		4.2664	4.7051	4.4699	5.6788	6.7238	6.6054
ENSMUSG00000047153	Khnyn	2.1187	0		9.7597	10.4753	9.9342	12.3199	12.3662	11.8779
ENSMUSG00000110631	Gm42047	2.1159	0		6.289	6.0978	6.1521	8.7418	8.0419	7.714
ENSMUSG00000054150	Syne3	2.1139	0		8.9058	9.3613	8.056	11.3777	11.3143	9.6884
ENSMUSG00000097835	Gm26910	2.1136	0		4.5429	4.604	5.019	7.0286	6.187	6.7037
ENSMUSG00000026809	Spaca9	2.1117	0.0004		3.7167	4.7532	3.7522	5.9672	6.3645	5.5412
ENSMUSG00000117013	Gm30531	2.1083	0.0324		2.5928	3.4682	2.9906	4.326	5.1178	3.7668
ENSMUSG00000034825	Nrip3	2.1074	0		6.2316	6.0214	5.9641	7.8199	7.8299	8.5707
ENSMUSG00000039942	Ptger4	2.107	0		6.251	6.2892	6.4282	8.1428	8.3395	8.6169
ENSMUSG00000039563	2210406O10Rik	2.1065	0.029		2.8174	3.0733	2.671	3.9387	4.314	4.2558
ENSMUSG00000039099	Wdr93	2.105	0.0001		3.9241	4.4951	4.7494	6.7909	6.2284	5.7396
ENSMUSG00000109541	Gm6112	2.1048	0.0659		2.5928	3.2173	2.48	3.5306	3.8673	4.6204
ENSMUSG00000104114	Gm37297	2.1043	0.0005		3.183	3.7779	4.1229	5.3848	5.6309	5.4535
ENSMUSG00000084899	Gm15344	2.1038	0		4.9272	5.3918	5.3614	7.1773	6.8877	7.5546
ENSMUSG00000016356	Col20a1	2.1028	0.0008		3.9241	4.4951	4.2481	6.6757	5.0731	6.0988
ENSMUSG00000054409	Tmem74	2.1011	0.0007		3.9241	3.4682	4.4176	5.731	5.2441	6.2365
ENSMUSG00000061232	H2-K1	2.0955	0		10.0401	9.9264	10.7968	12.3079	12.1145	12.7148
ENSMUSG00000118550	Gm52965	2.0953	0.1057		2.8174	3.0733	2.48	4.8358	3.8673	2.7541
ENSMUSG00000103696	Gm37531	2.094	0		4.4786	3.868	4.7064	5.806	6.4888	6.4096
ENSMUSG00000026819	Slc25a25	2.0922	0		9.5291	9.5277	10.0057	12.1686	11.5998	11.5194
ENSMUSG00000022203	Efs	2.0896	0.2542		2.3266	2.9133	2.2599	4.5167	2.6132	2.4258
ENSMUSG00000027605	Acss2	2.0882	0.0001		8.3806	8.0037	7.747	10.9213	10.0298	8.6269
ENSMUSG00000116498	Gm38563	2.087	0.0104		3.0117	2.9133	3.7522	4.685	4.46	5.2603
ENSMUSG00000042549	Map2k3os	2.084	0		4.4786	4.4375	4.7064	6.4292	6.539	6.3133
ENSMUSG00000088892	NA	2.0828	0.1181		2.3266	2.9133	2.671	2.9594	3.641	4.4496
ENSMUSG00000019055	Plod1	2.0823	0		9.2759	10.87	9.3193	12.2377	12.2484	11.7821
ENSMUSG00000085457	1110046J04Rik	2.082	0		5.2303	5.642	5.3334	7.4893	7.4992	7.1427
ENSMUSG00000035109	Shc4	2.0797	0.0015		3.7167	4.3774	3.7522	6.3645	5.0731	5.498
ENSMUSG00000085250	Gm15234	2.0778	0.001		4.1881	3.0733	3.9858	5.7815	5.3603	5.4535
ENSMUSG00000089706	B230216N24Rik	2.0773	0.0291		3.336	3.0733	2.9906	4.3924	5.2839	3.6134
ENSMUSG00000098068	Gm7909	2.0746	0.0316		2.5928	3.6819	2.8396	4.1063	5.0731	4.3559
ENSMUSG00000102191	Gm36569	2.0738	0.1395		2.8174	2.5278	3.4733	4.3924	2.339	5.2077
ENSMUSG00000001156	Mxd1	2.0726	0.0002		8.8111	8.7999	8.0082	11.454	10.4796	9.161
ENSMUSG00000068547	Clca4a	2.0709	0.0371		3.183	2.7334	3.1272	5.097	3.8673	3.9054
ENSMUSG00000109341	Gm30873	2.0705	0.1645		2.8174	2.5278	4.7912	3.9387	3.0422	6.7778
ENSMUSG00000054342	Kcnn4	2.0676	0.0741		3.0117	4.8447	2.8396	5.9003	6.2284	3.4417
ENSMUSG00000026305	Lrrfip1	2.0665	0		12.4864	11.6633	12.4155	14.4423	14.239	14.2034
ENSMUSG00000011632	Pinlyp	2.0664	0.0047		3.9241	3.9527	3.3669	5.9229	5.6614	4.3559
ENSMUSG00000029771	Irf5	2.0651	0.0117		3.0117	2.9133	3.9858	4.8358	4.5926	5.4076
ENSMUSG00000108732	2310043P16Rik	2.0609	0.0019		3.6006	3.6819	4.3632	5.731	4.879	6.1555
ENSMUSG00000028211	Trp53inp1	2.0601	0		12.2831	12.1917	12.1689	15.1325	13.8102	13.1628
ENSMUSG00000029314	Gpat3	2.0595	0		6.6074	6.8821	6.6933	8.7607	8.8866	8.5863
ENSMUSG00000074340	Ovgp1	2.0544	0.0007		3.6006	4.3148	3.9121	5.6246	6.187	5.153
ENSMUSG00000074968	Ano3	2.0534	0.0049		5.1081	4.3774	4.056	7.2144	6.2883	4.9755
ENSMUSG00000046223	Plaur	2.0533	0		9.9317	10.1187	9.9913	12.0337	11.9829	12.1725
ENSMUSG00000062991	Nrg1	2.0525	0		10.1266	9.2274	10.4786	12.4547	11.6634	12.0182
ENSMUSG00000075015	Gm10801	2.0518	0.0997		3.336	3.2173	4.2481	4.3924	2.8436	6.5641
ENSMUSG00000086841	2410006H16Rik	2.0508	0		10.1781	10.9901	10.7846	12.2201	12.8567	13.0216
ENSMUSG00000084817	Gm5526	2.0504	0		4.9746	4.7051	5.2461	7.1773	6.1006	7.1842
ENSMUSG00000040472	Rabggta	2.0502	0		9.0893	9.1886	9.3614	11.0464	11.6106	11.0489
ENSMUSG00000073274	Gm14636	2.0479	0		6.8299	6.7698	6.7151	8.5147	9.0627	8.7049
ENSMUSG00000030659	Nucb2	2.0476	0		8.6156	8.0185	8.4176	10.6777	10.2802	10.2105
ENSMUSG00000000627	Sema4f	2.0475	0.073		2.3266	3.2173	3.1272	4.9723	3.9684	3.4417
ENSMUSG00000030134	Rasgef1a	2.0433	0.0004		5.4135	5.089	4.7064	7.7956	6.4717	6.183
ENSMUSG00000113423	Gm3791	2.0427	0.041		2.8174	2.9133	2.9906	3.5306	4.314	4.6204
ENSMUSG00000030208	Emp1	2.0415	0		12.3632	11.9311	11.4714	14.2627	14.4595	12.8191
ENSMUSG00000036006	Ripor2	2.0386	0		9.3808	8.7115	9.6134	11.431	11.3725	11.1227
ENSMUSG00000003355	Fkbp11	2.0367	0		4.2664	4.1806	4.3632	6.1317	5.6913	6.3133
ENSMUSG00000025912	Mybl1	2.0362	0		9.1831	8.4705	9.008	11.6705	10.651	10.0271
ENSMUSG00000056055	Sag	2.0321	0.0001		4.0176	3.868	4.9835	6.2617	6.1227	6.21
ENSMUSG00000071332	E230015B07Rik	2.0213	0.0962		2.8174	2.2879	3.4733	4.9282	3.3724	4.0319
ENSMUSG00000057948	Unc13d	2.0202	0		9.6689	10.0116	9.7267	11.9835	11.6807	11.7967
ENSMUSG00000087424	5730405O15Rik	2.0198	0		4.7202	4.8447	4.8317	6.5504	6.3645	6.9952
ENSMUSG00000109784	Gm45493	2.0193	0		4.3407	4.4375	4.2481	5.7815	6.0086	6.5217
ENSMUSG00000065904	Gm26109	2.0169	0.0007		3.7167	3.3482	3.9121	5.2834	5.2441	5.4076
ENSMUSG00000025650	Col7a1	2.0118	0.0086		4.8782	6.0978	8.2024	8.9013	9.0656	9.0644
ENSMUSG00000041957	Pkp2	2.0094	0		9.9833	10.2268	9.9991	12.2603	12.1107	11.8351
ENSMUSG00000028108	Ecm1	2.0089	0		7.2126	7.3172	7.3738	9.4397	9.7158	8.3817
ENSMUSG00000097015	Gm26705	2.004	0.1042		2.5928	2.9133	2.8396	4.7371	3.2167	3.4417
ENSMUSG00000056749	Nfil3	2.0037	0		7.3266	8.1409	8.72	9.7382	10.0801	10.5501
ENSMUSG00000112449	Srp54b	2.0026	0.0432		2.8174	2.9133	3.5724	3.6439	4.46	5.2077
[truncated: 13,909 more rows]
